# Supplementary material for: Chemoselective catalytic hydrodefluorination of trifluoromethylalkenes towards mono-/gem-di-fluoroalkenes under metal-free conditions
Source: PubMed Central journal article supplement (PMC8121801; doi:10.1038/s41467-021-23101-3), 2021-05-14
Supplement: 41467_2021_23101_MOESM1_ESM.pdf [file 41467_2021_23101_MOESM1_ESM.pdf]

## **Supplementary Information**

**Chemoselective Catalytic Hydrodefluorination of Trifluoromethylalkenes towards  
Mono-/*gem*-Di-Fluoroalkenes under Metal-free Conditions**

*Zhang et al.*

## Supplementary Methods

### General information

**Chemicals:** Catalyst **1** has been synthesized and characterized in our previous paper.<sup>1</sup> Trifluoromethyl alkenes **2** were synthesized according to references. Other reagents and solvent were purchased from J&K or TCI Chemicals and used without further purification unless specified otherwise. Acetonitrile was purchased from J&K Chemical (99.9 %, Extra dry, water < 10 ppm, J&K seal) and degassed and distilled by standard methods. Reaction temperature refers to the temperature of an aluminum heating block or a silicon oil bath, which was controlled by an electronic temperature modulator from IKA.

**Reactions:** All hydrodefluorination reactions were carried out in dry glass wares under an argon atmosphere using Schlenk technique throughout the reaction procedures.

**Analytcs:** <sup>1</sup>H and <sup>13</sup>C NMR, <sup>19</sup>F NMR spectra were recorded in CDCl<sub>3</sub> ( $\delta = 7.26$  for <sup>1</sup>H NMR,  $\delta = 77.16$  ppm for <sup>13</sup>C NMR) on 400 MHz NMR instrument at Center of Basic Molecular Science (CBMS) of Tsinghua University.

**DFT calculations:** Geometry optimizations and frequency computations were performed using Gaussian 09<sup>2</sup> at the M06-2X<sup>3,4</sup>/6-31+G(d) level of theory, in conjunction with the SMD<sup>5</sup> model to account for the solvation effect of acetonitrile. To obtain more accurate electronic energies, single point energy calculations were performed at the SMD-M06-2X/[6-311++G(2df, 2p)] level with the SMD-M06-2X/[6-31+G(d)] structures.

### Experimental procedure

#### The reaction of trifluoromethyl alkene **2a** with stoichiometric catalyst **1**

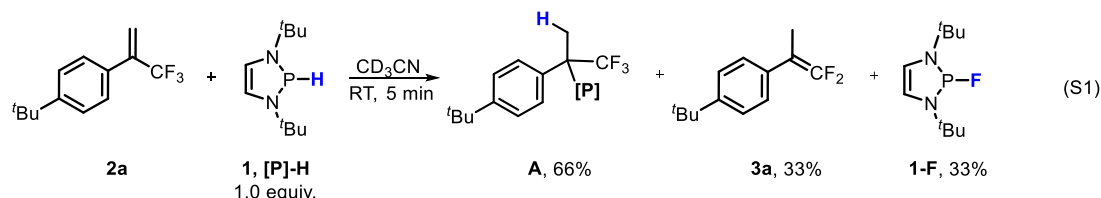

Trifluoromethyl alkene **2a** (0.5 mmol), diazaphospholene **1** (0.5 mmol) and CD<sub>3</sub>CN (1.0 mL) were taken in a Schlenk tube under argon. The mixture was stirred at room temperature for 5 minutes. The reaction were monitored by <sup>19</sup>F NMR and <sup>31</sup>P NMR spectra, confirming the generation of intermediate **A** as the major product with a small number of **3a** and **1-F**. The <sup>19</sup>F NMR and <sup>31</sup>P NMR spectra were shown as below:

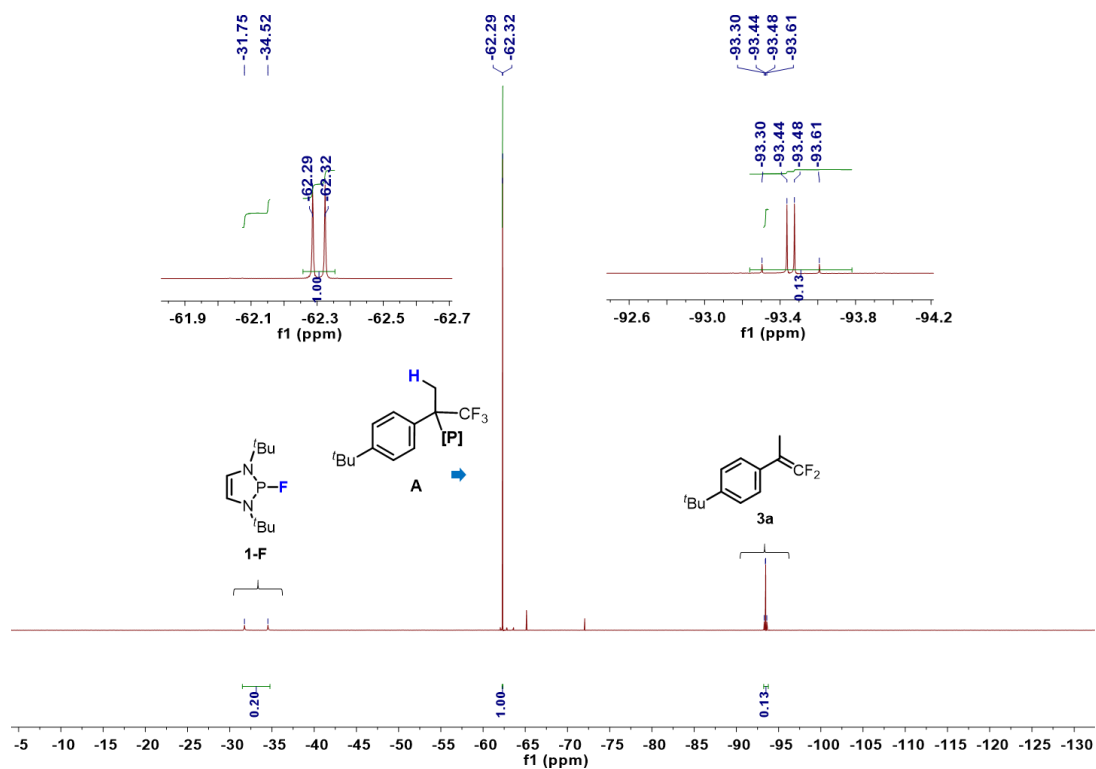

**Supplementary Figure 1.** The <sup>19</sup>F NMR spectrum (with <sup>1</sup>H decoupling) of the reaction mixture in CD<sub>3</sub>CN.

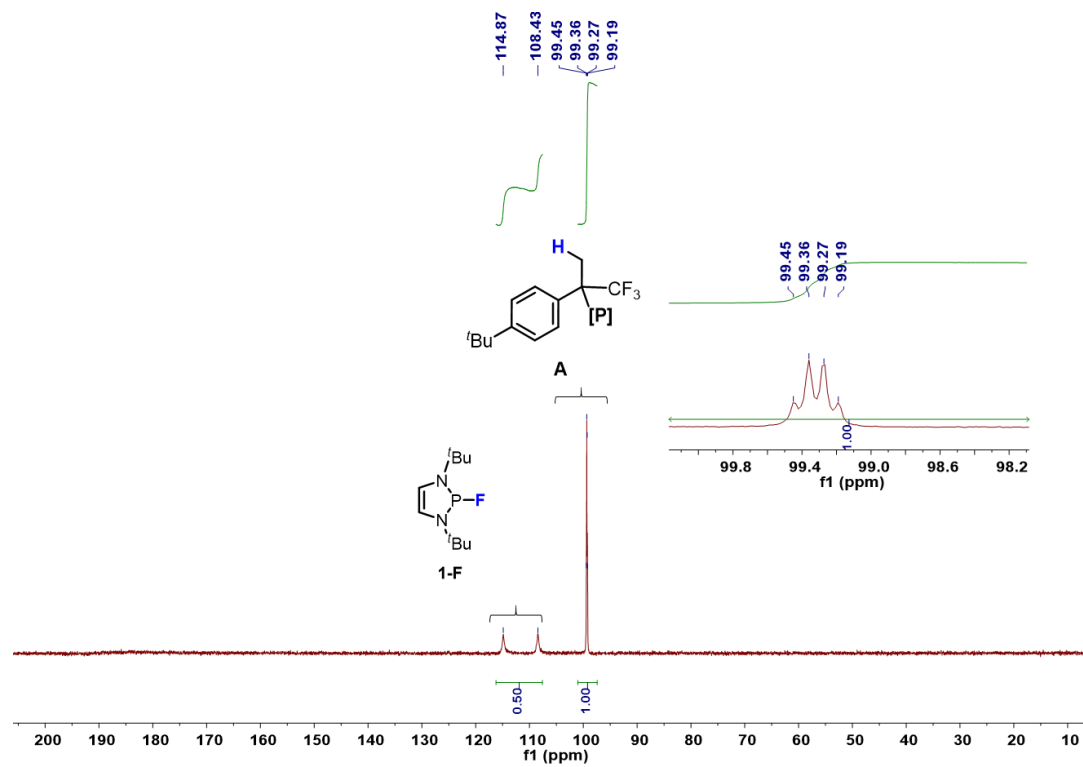

**Supplementary Figure 2.** The <sup>31</sup>P NMR spectrum (with <sup>1</sup>H decoupling) of the reaction mixture in CD<sub>3</sub>CN.

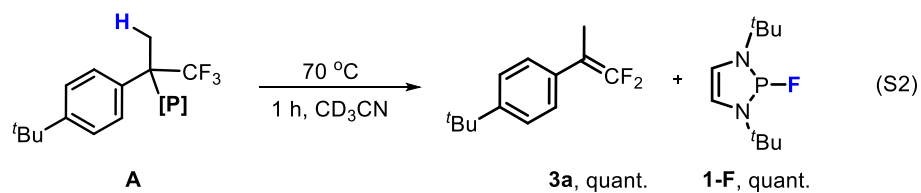

The mixture of Eq. S1 was stirred at 70 °C for one hour. The reaction were monitored by  $^{19}\text{F}$  NMR and  $^{31}\text{P}$  NMR spectra. The  $^{19}\text{F}$  NMR and  $^{31}\text{P}$  NMR spectra were shown as below:

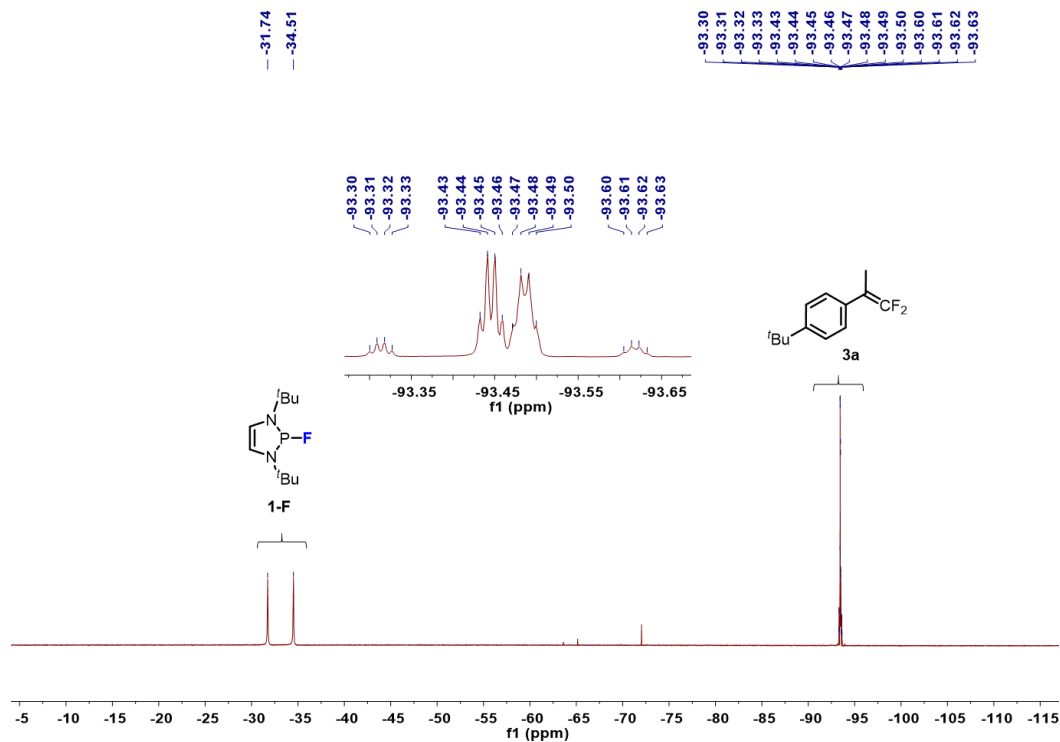

**Supplementary Figure 3.** The  $^{19}\text{F}$  NMR spectrum of the reaction mixture in  $\text{CD}_3\text{CN}$ .

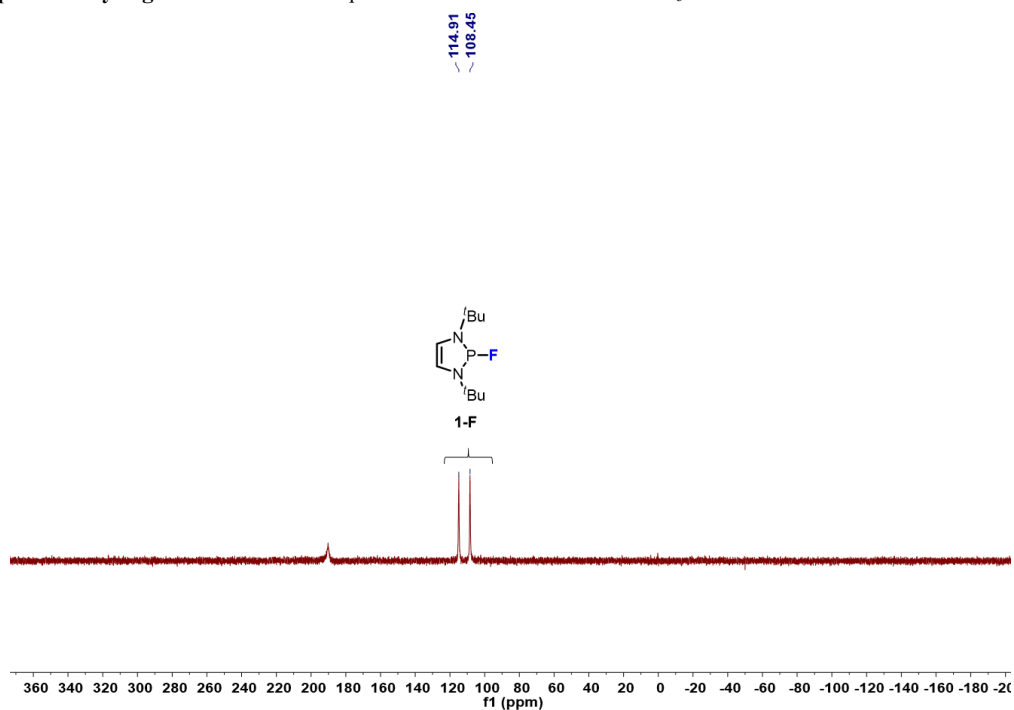

**Supplementary Figure 4.** The  $^{31}\text{P}$  NMR spectrum of the reaction mixture in  $\text{CD}_3\text{CN}$ .

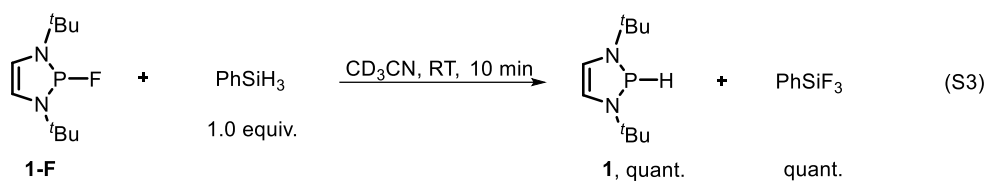

PhSiH<sub>3</sub> was added to the CD<sub>3</sub>CN solution of **1-F** at room temperature for 10 minutes. The reactions were monitored by <sup>31</sup>P NMR spectra. The <sup>31</sup>P NMR spectrum was shown as below:

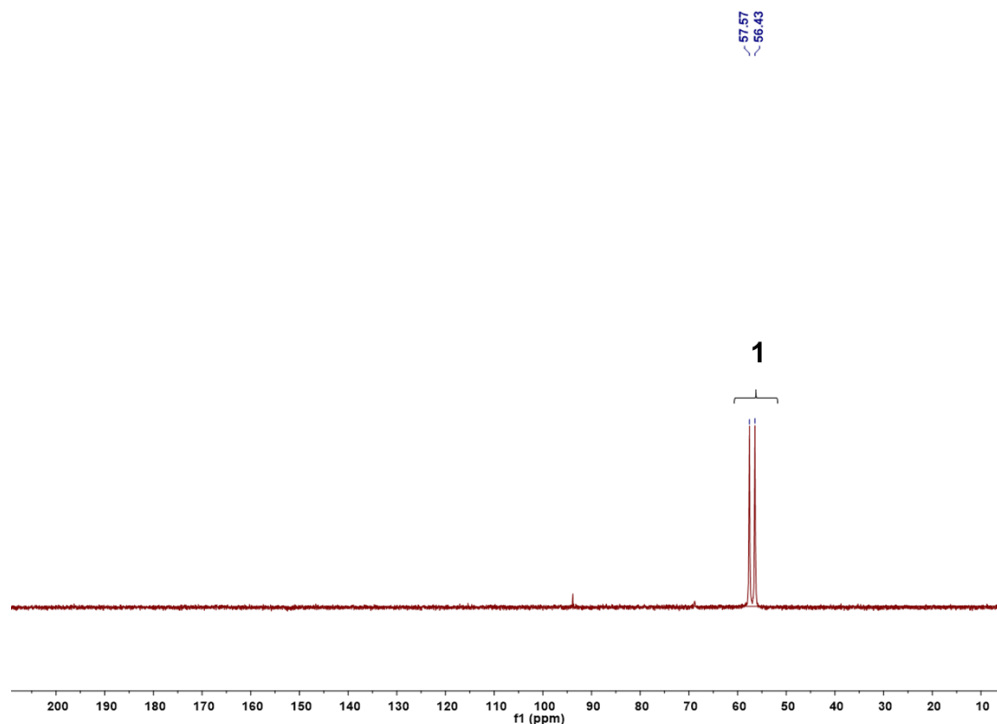

**Supplementary Figure 5.** The <sup>31</sup>P NMR spectrum of the reaction mixture in CD<sub>3</sub>CN.

### The synthesis and analysis of trifluoromethyl alkenes **2** and **5**

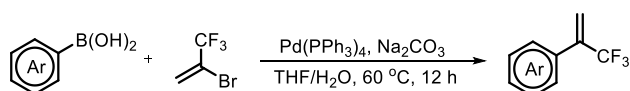

The trifluoromethyl alkenes **2** were synthesized according to reported methods.<sup>6</sup> The **2s** was obtained with a mixture of the olefins (*E/Z* 1/1), and the NMR spectra were consistent with that reported in the reference.<sup>7</sup>

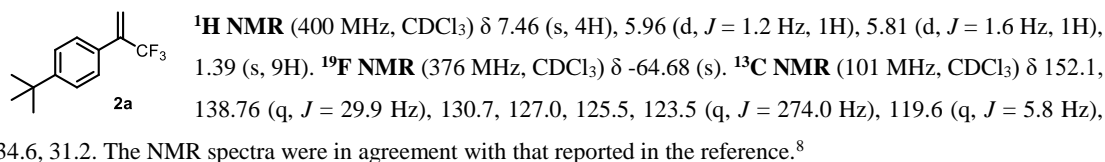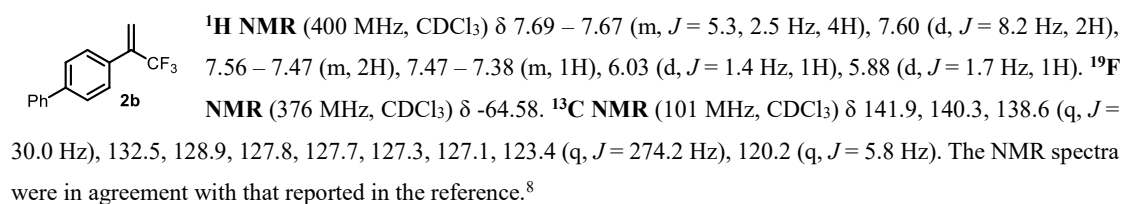

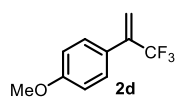

**<sup>1</sup>H NMR** (400 MHz, CDCl<sub>3</sub>) δ 7.51 – 7.37 (m, 2H), 6.95 (d, *J* = 8.9 Hz, 2H), 5.91 (q, *J* = 1.3 Hz, 1H), 5.73 (q, *J* = 1.7 Hz, 1H), 3.86 (s, 3H). **<sup>19</sup>F NMR** (376 MHz, CDCl<sub>3</sub>) δ -64.85. **<sup>13</sup>C NMR** (101 MHz, CDCl<sub>3</sub>) δ 160.2, 138.4 (q, *J* = 29.8 Hz), 128.6, 126.0, 123.5 (q, *J* = 274.0 Hz), 118.8 (q, *J* = 5.8 Hz), 114.0, 55.3. The NMR spectra were in agreement with that reported in the reference.<sup>9</sup>

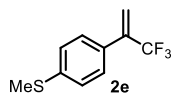

**<sup>1</sup>H NMR** (400 MHz, CDCl<sub>3</sub>) δ 7.42 (d, *J* = 8.2 Hz, 2H), 7.28 (d, *J* = 8.5 Hz, 2H), 5.99 – 5.89 (m, 1H), 5.79 (d, *J* = 1.7 Hz, 1H), 2.53 (s, 3H). **<sup>19</sup>F NMR** (376 MHz, CDCl<sub>3</sub>) δ -64.71. **<sup>13</sup>C NMR** (101 MHz, CDCl<sub>3</sub>) δ 140.1, 138.4 (q, *J* = 29.9 Hz), 130.1, 127.6, 126.1, 123.4 (q, *J* = 274.0 Hz), 119.7 (q, *J* = 5.8 Hz), 15.4. The NMR spectra were in agreement with that reported in the reference.<sup>10</sup>

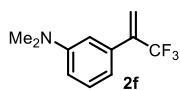

**<sup>1</sup>H NMR** (400 MHz, CDCl<sub>3</sub>) δ 7.31 – 7.26 (m, 1H), 6.88 – 6.75 (m, 3H), 5.96 (q, *J* = 1.4 Hz, 1H), 5.79 (q, *J* = 1.7 Hz, 1H), 3.01 (s, 6H). **<sup>19</sup>F NMR** (376 MHz, CDCl<sub>3</sub>) δ -64.69. **<sup>13</sup>C NMR** (101 MHz, CDCl<sub>3</sub>) δ 150.6, 139.8 (q, *J* = 29.8 Hz), 134.6, 129.2, 123.5 (q, *J* = 274.1 Hz), 120.1 (q, *J* = 5.7 Hz), 115.7, 113.1, 111.5, 40.5.

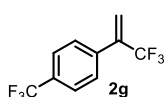

**<sup>1</sup>H NMR** (400 MHz, CDCl<sub>3</sub>) δ 7.68 (d, *J* = 8.3 Hz, 2H), 7.60 (d, *J* = 8.2 Hz, 2H), 6.09 (d, *J* = 1.5 Hz, 1H), 5.87 (d, *J* = 1.7 Hz, 1H). **<sup>19</sup>F NMR** (376 MHz, CDCl<sub>3</sub>) δ -62.97, -64.94. **<sup>13</sup>C NMR** (101 MHz, CDCl<sub>3</sub>) δ 138.1 (q, *J* = 30.4 Hz), 137.1, 131.1 (q, *J* = 32.8 Hz), 127.8, 125.6 (q, *J* = 3.7 Hz), 123.9 (q, *J* = 272.1 Hz), 122.1 (q, *J* = 5.7 Hz), 123.0 (q, *J* = 273.9 Hz). The NMR spectra were in agreement with that reported in the reference.<sup>9</sup>

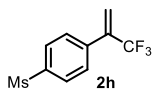

**<sup>1</sup>H NMR** (400 MHz, CDCl<sub>3</sub>) δ 7.97 (d, *J* = 8.5 Hz, 2H), 7.73 – 7.59 (m, 2H), 6.12 (s, 1H), 5.91 (s, 1H), 3.08 (s, 3H). **<sup>19</sup>F NMR** (376 MHz, CDCl<sub>3</sub>) δ -64.74. **<sup>13</sup>C NMR** (101 MHz, CDCl<sub>3</sub>) δ 141.0, 138.9, 137.7 (q, *J* = 31.0 Hz), 128.4, 127.8, 122.8 (d, *J* = 274.1 Hz), 123.1 (q, *J* = 5.7 Hz), 44.5. The NMR spectra were in agreement with that reported in the reference.<sup>11</sup>

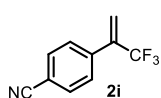

**<sup>1</sup>H NMR** (400 MHz, CDCl<sub>3</sub>) δ 7.71 (d, *J* = 8.5 Hz, 2H), 7.59 (d, *J* = 8.2 Hz, 2H), 6.12 (d, *J* = 1.5 Hz, 1H), 5.91 (d, *J* = 1.7 Hz, 1H). **<sup>19</sup>F NMR** (376 MHz, CDCl<sub>3</sub>) δ -64.71. **<sup>13</sup>C NMR** (101 MHz, CDCl<sub>3</sub>) δ 137.9, 137.7 (q, *J* = 30.8 Hz), 132.4, 128.1, 122.82 (q, *J* = 5.6 Hz), 122.80 (q, *J* = 273.9 Hz), 118.2, 112.9. The NMR spectra were in agreement with that reported in the reference.<sup>12</sup>

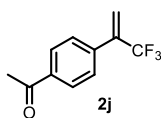

**<sup>1</sup>H NMR** (400 MHz, CDCl<sub>3</sub>) δ 7.97 (d, *J* = 8.6 Hz, 2H), 7.65 – 7.47 (m, 2H), 6.05 (d, *J* = 1.4 Hz, 1H), 5.87 (d, *J* = 1.7 Hz, 1H), 2.61 (s, 3H). **<sup>19</sup>F NMR** (376 MHz, CDCl<sub>3</sub>) δ -64.67. **<sup>13</sup>C NMR** (101 MHz, CDCl<sub>3</sub>) δ 197.3, 138.2 (q, *J* = 30.4 Hz), 137.9, 137.2, 128.5, 127.5, 123.0 (q, *J* = 274.0 Hz), 121.9 (q, *J* = 5.7 Hz), 26.5. The NMR spectra were in agreement with that reported in the reference.<sup>13</sup>

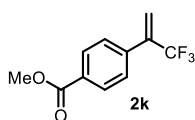

**<sup>1</sup>H NMR** (400 MHz, CDCl<sub>3</sub>) δ 8.07 (d, *J* = 8.8 Hz, 2H), 7.55 (d, *J* = 8.0 Hz, 2H), 6.06 (d, *J* = 1.4 Hz, 1H), 5.88 (d, *J* = 1.7 Hz, 1H), 3.95 (s, 3H). **<sup>19</sup>F NMR** (376 MHz, CDCl<sub>3</sub>) δ -64.69. **<sup>13</sup>C NMR** (101 MHz, CDCl<sub>3</sub>) δ 166.5, 138.3 (q, *J* = 30.4 Hz), 137.8, 130.6, 129.8, 127.4, 123.1 (q, *J* = 274.0 Hz), 121.8 (q, *J* = 5.7 Hz), 52.2. The NMR spectra were in agreement with that reported in the reference.<sup>8</sup>

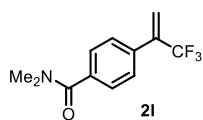

**<sup>1</sup>H NMR** (400 MHz, CDCl<sub>3</sub>) δ 7.50 (d, *J* = 8.2 Hz, 2H), 7.45 (d, *J* = 8.4 Hz, 2H), 6.01 (d, *J* = 1.4 Hz, 1H), 5.82 (d, *J* = 1.7 Hz, 1H), 3.13 (s, 3H), 3.00 (s, 3H). **<sup>19</sup>F NMR** (376 MHz, CDCl<sub>3</sub>) δ -64.77. **<sup>13</sup>C NMR** (101 MHz, CDCl<sub>3</sub>) δ 170.8, 138.3 (q, *J* = 30.3 Hz), 136.9, 134.7, 127.4, 127.3, 123.1 (q, *J* = 274.0 Hz), 121.2 (q, *J* = 5.8 Hz), 39.5, 35.3. The NMR spectra were in agreement with that reported in the reference.<sup>14</sup>

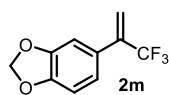

**<sup>1</sup>H NMR** (400 MHz, CDCl<sub>3</sub>) δ 7.03 – 6.95 (m, 2H), 6.88 – 6.79 (m, 1H), 6.02 (s, 2H), 5.91 (d, *J* = 1.3 Hz, 1H), 5.71 (d, *J* = 1.7 Hz, 1H). **<sup>19</sup>F NMR** (376 MHz, CDCl<sub>3</sub>) δ -64.90. **<sup>13</sup>C NMR** (101 MHz, CDCl<sub>3</sub>) δ 148.3, 147.9, 138.5 (q, *J* = 29.9 Hz), 127.5, 123.3 (q, *J* = 273.9 Hz), 121.5, 119.6 (q, *J* = 5.7 Hz), 108.3, 107.8, 101.4. The NMR spectra were in agreement with that reported in the reference.<sup>11</sup>

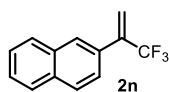

**<sup>1</sup>H NMR** (400 MHz, CDCl<sub>3</sub>) δ 7.99 (s, 1H), 7.93 – 7.87 (m, 3H), 7.65 – 7.59 (m, 1H), 7.60 – 7.52 (m, 2H), 6.10 (d, *J* = 1.4 Hz, 1H), 5.94 (d, *J* = 1.7 Hz, 1H). **<sup>19</sup>F NMR** (376 MHz, CDCl<sub>3</sub>) δ -64.39. **<sup>13</sup>C NMR** (101 MHz, CDCl<sub>3</sub>) δ 139.0 (q, *J* = 30.0 Hz), 133.3, 133.1, 130.9, 128.5, 128.3, 127.6, 127.0, 126.8, 126.6, 123.5 (q, *J* = 274.0 Hz), 124.7, 120.7 (q, *J* = 5.8 Hz). The NMR spectra were in agreement with that reported in the reference.<sup>15</sup>

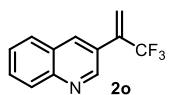

**<sup>1</sup>H NMR** (400 MHz, CDCl<sub>3</sub>) δ 9.00 (d, *J* = 2.3 Hz, 1H), 8.35 – 8.21 (m, 1H), 8.14 (d, *J* = 8.5 Hz, 1H), 7.86 (dd, *J* = 8.3, 1.3 Hz, 1H), 7.77 (ddd, *J* = 8.4, 6.8, 1.4 Hz, 1H), 7.60 (td, *J* = 7.4, 6.8, 1.1 Hz, 1H), 6.17 (d, *J* = 1.6 Hz, 1H), 5.99 (d, *J* = 1.7 Hz, 1H). **<sup>19</sup>F NMR** (376 MHz, CDCl<sub>3</sub>) δ -64.97. **<sup>13</sup>C NMR** (101 MHz, CDCl<sub>3</sub>) δ 148.9, 147.9, 136.3 (q, *J* = 30.9 Hz), 134.4, 130.3, 129.3, 128.3, 127.4, 127.1, 126.4, 123.1 (q, *J* = 274.1 Hz), 122.1 (q, *J* = 5.7 Hz). The NMR spectra were in agreement with that reported in the reference.<sup>16</sup>

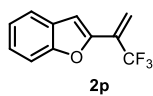

**<sup>1</sup>H NMR** (400 MHz, CDCl<sub>3</sub>) δ 7.62 (dt, *J* = 7.7, 1.0 Hz, 1H), 7.52 (dq, *J* = 8.3, 0.9 Hz, 1H), 7.38 (ddd, *J* = 8.3, 7.3, 1.3 Hz, 1H), 7.28 (td, *J* = 7.5, 1.0 Hz, 1H), 6.93 (s, 1H), 6.34 (d, *J* = 1.8 Hz, 1H), 6.03 (d, *J* = 1.3 Hz, 1H). **<sup>19</sup>F NMR** (376 MHz, CDCl<sub>3</sub>) δ -65.58. **<sup>13</sup>C NMR** (101 MHz, CDCl<sub>3</sub>) δ 154.7, 148.5, 129.4 (q, *J* = 32.3 Hz), 128.4, 125.7, 123.3, 122.4 (q, *J* = 273.1 Hz), 121.8, 118.1 (q, *J* = 5.3 Hz), 111.1, 106.3. The NMR spectra were in agreement with that reported in the reference.<sup>17</sup>

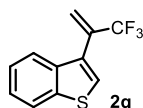

**<sup>1</sup>H NMR** (400 MHz, CDCl<sub>3</sub>) δ 7.99 – 7.93 (m, 1H), 7.92 – 7.87 (m, 1H), 7.60 (d, *J* = 1.1 Hz, 1H), 7.54 – 7.36 (m, 2H), 6.32 (d, *J* = 1.5 Hz, 1H), 5.90 (d, *J* = 1.5 Hz, 1H). **<sup>19</sup>F NMR** (376 MHz, CDCl<sub>3</sub>) δ -66.51. **<sup>13</sup>C NMR** (101 MHz, CDCl<sub>3</sub>) δ 140.0, 138.1, 133.1 (q, *J* = 31.6 Hz), 128.7, 126.3, 124.8, 124.7, 122.7 (q, *J* = 5.5 Hz), 122.9, 122.7 (q, *J* = 231.0 Hz), 122.5. The NMR spectra were in agreement with that reported in the reference.<sup>18</sup>

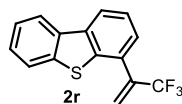

**<sup>1</sup>H NMR** (400 MHz, CDCl<sub>3</sub>) δ 8.25 – 8.11 (m, 2H), 7.96 – 7.81 (m, 1H), 7.62 – 7.44 (m, 4H), 6.38 (d, *J* = 1.5 Hz, 1H), 6.10 (d, *J* = 1.5 Hz, 1H). **<sup>19</sup>F NMR** (376 MHz, CDCl<sub>3</sub>) δ -65.85. **<sup>13</sup>C NMR** (101 MHz, CDCl<sub>3</sub>) δ 140.1, 139.2, 137.8 (q, *J* = 31.2 Hz), 136.4, 135.7, 128.7, 127.1, 126.5, 124.6, 124.6, 123.7 (q, *J* = 5.4 Hz), 123.0 (q, *J* = 274.2 Hz), 122.7, 122.0, 121.8. The NMR spectra were in agreement with that reported in the reference.<sup>19</sup>

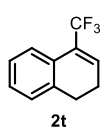

**<sup>1</sup>H NMR** (400 MHz, CDCl<sub>3</sub>) δ 7.55 – 7.49 (m, 1H), 7.35 – 7.21 (m, 4H), 6.81 – 6.77 (m, 1H), 2.88 (t, *J* = 8.1 Hz, 2H), 2.49 (ddd, *J* = 8.6, 5.1, 2.6 Hz, 2H). **<sup>19</sup>F NMR** (376 MHz, CDCl<sub>3</sub>) δ -63.88. The NMR spectra were in agreement with that reported in the reference.<sup>16</sup>

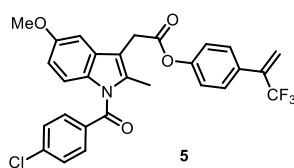

The trifluoromethyl alkenes **5** were synthesized according to reported methods.<sup>20</sup> **<sup>1</sup>H NMR** (400 MHz, CDCl<sub>3</sub>) δ 7.75 – 7.66 (m, 2H), 7.55 – 7.44 (m, 4H), 7.17 – 7.06 (m, 3H), 6.93 (d, *J* = 9.0 Hz, 1H), 6.73 (dd, *J* = 9.0, 2.5 Hz, 1H), 6.01 – 5.96 (m, 1H), 5.77 (d, *J* = 1.6 Hz, 1H), 3.95 (s, 2H), 3.87 (s, 3H), 2.49 (s, 3H). **<sup>19</sup>F NMR** (376 MHz, CDCl<sub>3</sub>) δ -64.88. **<sup>13</sup>C NMR** (101 MHz, CDCl<sub>3</sub>) δ 169.1, 168.3, 156.2, 151.2, 139.4, 138.0 (q, *J* = 30.3 Hz), 136.3, 133.8, 131.4, 131.2, 130.9, 130.5, 129.2, 128.6, 123.2 (q, *J* = 273.8 Hz), 121.6, 120.8 (q, *J* = 5.7 Hz), 115.1, 111.8, 101.2, 55.7, 30.6, 13.5. The NMR spectra were in agreement with that reported in the reference.<sup>20</sup>

### The HDF of trifluoromethyl alkenes **2** to furnish gem-difluoroalkenes **3**

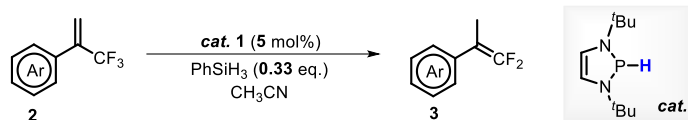

Trifluoromethyl alkenes **2** (0.3 mmol), diazaphospholene **1** (0.015 mmol, 5 mol%), PhSiH<sub>3</sub> (0.1 mmol) and CH<sub>3</sub>CN (1.0 mL) were taken in a Schlenk tube under argon. The mixture was stirred at the specified temperature. The reactions were monitored by <sup>19</sup>F NMR spectra to ensure conversion to desired products. The resulting mixture was cooling down to room temperature and concentrated under vacuum (Note: due to the low boiling point of products, the solvent was evaporated by the rotary evaporator at about 450 mbar). The crude products were purified by flash column chromatography through a silica plug using petroleum ether as the eluent.

The *E* isomer of the **2s** did not react at all. The yield from the *Z* isomer was determined by <sup>19</sup>F NMR. Spectral data matches the reported data in the literature.<sup>21</sup>

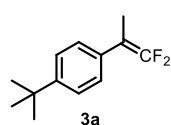

Colorless liquid, 62.3 mg, 0.3 mmol, 99% yield. **<sup>1</sup>H NMR** (400 MHz, CDCl<sub>3</sub>) δ 7.47 – 7.29 (m, 4H), 2.01 (t, *J* = 3.4 Hz, 3H), 1.37 (s, 9H). **<sup>19</sup>F NMR** (376 MHz, CDCl<sub>3</sub>) δ -90.76 (d, *J* = 44.8 Hz), -91.05 (d, *J* = 44.9 Hz). **<sup>13</sup>C NMR** (101 MHz, CDCl<sub>3</sub>) δ 153.5 (dd, *J* = 289.8, 285.5 Hz), 150.0, 131.9, 127.1 (t, *J* = 4.0 Hz), 125.3, 87.2 (dd, *J* = 22.0, 14.4 Hz), 34.5, 31.3, 13.1. The NMR spectra were in agreement with that reported in the reference.<sup>22</sup>

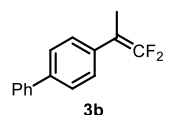

White solid, 68.2 mg, 0.3 mmol, 99% yield. **<sup>1</sup>H NMR** (400 MHz, CDCl<sub>3</sub>) δ 7.70 – 7.61 (m, 4H), 7.55 – 7.47 (m, 4H), 7.45 – 7.38 (m, 1H), 2.08 (t, *J* = 3.4 Hz, 3H). **<sup>19</sup>F NMR** (376 MHz, CDCl<sub>3</sub>) δ -89.72 (d, *J* = 42.9 Hz), -90.11 (d, *J* = 42.9 Hz). **<sup>13</sup>C NMR** (101 MHz, CDCl<sub>3</sub>) δ 153.63 (dd, *J* = 290.8, 286.3 Hz), 140.6, 139.9, 133.9 (t, *J* = 4.3 Hz), 128.9, 127.9 (t, *J* = 4.1 Hz), 127.4, 127.1, 127.0, 87.3 (dd, *J* = 22.7, 14.1 Hz), 13.2. **M.P.** 64 – 65 °C. The NMR spectra were in agreement with that reported in the reference.<sup>23</sup>



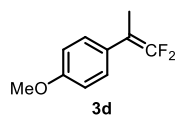

Colorless liquid, 54.7 mg, 0.3 mmol, 99% yield.  $^1\text{H NMR}$  (400 MHz,  $\text{CDCl}_3$ )  $\delta$  7.36 – 7.27 (m, 2H), 6.97 – 6.86 (m, 2H), 3.84 (s, 3H), 1.97 (t,  $J = 3.4$  Hz, 3H).  $^{19}\text{F NMR}$  (376 MHz,  $\text{CDCl}_3$ )  $\delta$  -91.74 (d,  $J = 47.0$  Hz), -91.97 (d,  $J = 47.0$  Hz).  $^{13}\text{C NMR}$  (101 MHz,  $\text{CDCl}_3$ )  $\delta$  158.5, 153.3 (dd,  $J = 288.6, 285.1$  Hz), 128.6 (dd,  $J = 4.3, 3.6$  Hz), 127.1 (t,  $J = 3.5$  Hz), 113.8, 86.9 (dd,  $J = 22.1, 15.1$  Hz), 55.3, 13.4 (t,  $J = 1.8$  Hz). The NMR spectra were in agreement with that reported in the reference.<sup>24</sup>

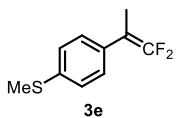

Colorless liquid, 59.1 mg, 0.29 mmol, 98% yield.  $^1\text{H NMR}$  (400 MHz,  $\text{CDCl}_3$ )  $\delta$  7.35 – 7.30 (m, 2H), 7.29 – 7.25 (m, 2H), 2.52 (s, 3H), 1.98 (t,  $J = 3.4$  Hz, 3H).  $^{19}\text{F NMR}$  (376 MHz,  $\text{CDCl}_3$ )  $\delta$  -90.17 (d,  $J = 43.6$  Hz), -90.44 (d,  $J = 43.6$  Hz).  $^{13}\text{C NMR}$  (101 MHz,  $\text{CDCl}_3$ )  $\delta$  153.5 (dd,  $J = 290.1, 286.1$  Hz), 137.3, 131.6 (t,  $J = 4.0$  Hz), 127.8 (t,  $J = 4.2$  Hz), 126.5, 87.1 (dd,  $J = 22.5, 14.4$  Hz), 15.8, 13.1. The NMR spectra were in agreement with that reported in the reference.<sup>6</sup>

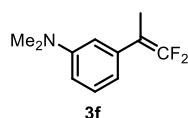

Colorless liquid, 57.9 mg, 0.3 mmol, 99% yield.  $^1\text{H NMR}$  (400 MHz,  $\text{CDCl}_3$ )  $\delta$  7.31 – 7.21 (m, 1H), 6.80 – 6.66 (m, 3H), 2.99 (s, 6H), 2.00 (t,  $J = 3.4$  Hz, 3H).  $^{19}\text{F NMR}$  (376 MHz,  $\text{CDCl}_3$ )  $\delta$  -90.96 (d,  $J = 45.0$  Hz), -91.25 (d,  $J = 45.3$  Hz).  $^{13}\text{C NMR}$  (101 MHz,  $\text{CDCl}_3$ )  $\delta$  153.4 (dd,  $J = 285.1, 286.1$  Hz), 150.6, 135.7 (t,  $J = 3.8$  Hz), 129.0, 116.1 (t,  $J = 3.6$  Hz), 111.9 (t,  $J = 3.4$  Hz), 111.6, 88.1 (dd,  $J = 21.9, 14.8$  Hz), 40.6, 13.6. **ESI-HR** calcd for  $\text{C}_{11}\text{H}_{14}\text{F}_2\text{N}^+$ : 198.1089, found 198.1092.

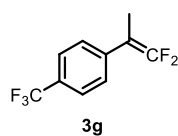

Colorless liquid, 60.6 mg, 0.27 mmol, 91% yield.  $^1\text{H NMR}$  (400 MHz,  $\text{CDCl}_3$ )  $\delta$  7.65 – 7.58 (m, 2H), 7.53 – 7.44 (m, 2H), 2.00 (t,  $J = 3.4$  Hz, 3H).  $^{19}\text{F NMR}$  (376 MHz,  $\text{CDCl}_3$ )  $\delta$  -62.7, -88.0 (d,  $J = 38.8$  Hz), -88.8 (d,  $J = 38.8$  Hz). The NMR spectra were in agreement with that reported in the reference.<sup>25</sup>

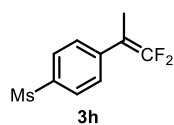

Colorless liquid, 68.6 mg, 0.3 mmol, 99% yield.  $^1\text{H NMR}$  (400 MHz,  $\text{CDCl}_3$ )  $\delta$  7.98 – 7.87 (m, 2H), 7.63 – 7.50 (m, 2H), 3.06 (s, 3H), 2.01 (t,  $J = 3.4$  Hz, 3H).  $^{19}\text{F NMR}$  (376 MHz,  $\text{CDCl}_3$ )  $\delta$  -86.45 (d,  $J = 35.5$  Hz), -87.49 (d,  $J = 35.4$  Hz).  $^{13}\text{C NMR}$  (101 MHz,  $\text{CDCl}_3$ )  $\delta$  154.0 (dd,  $J = 293.3, 288.7$  Hz), 140.7 (t,  $J = 4.8$  Hz), 138.9, 128.3 (dd,  $J = 5.3, 3.4$  Hz), 127.5, 87.0 (dd,  $J = 24.2, 13.2$  Hz), 44.5, 12.9. **ESI-HR** calcd for  $\text{C}_{10}\text{H}_{11}\text{F}_2\text{O}_2\text{S}^+$ : 233.0442, found 233.0450.

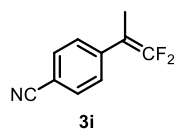

Colorless liquid, 50.5 mg, 0.28 mmol, 94% yield.  $^1\text{H NMR}$  (400 MHz,  $\text{CDCl}_3$ )  $\delta$  7.66 (d,  $J = 8.4$  Hz, 2H), 7.55 – 7.46 (m, 2H), 2.02 (d,  $J = 3.4$  Hz, 3H).  $^{19}\text{F NMR}$  (376 MHz,  $\text{CDCl}_3$ )  $\delta$  -86.19 (d,  $J = 34.8$  Hz), -87.07 (d,  $J = 34.8$  Hz).  $^{13}\text{C NMR}$  (101 MHz,  $\text{CDCl}_3$ )  $\delta$  154.0 (dd,  $J = 293.8, 288.8$  Hz), 139.7 (t,  $J = 4.8$  Hz), 132.1, 128.0 (dd,  $J = 5.5, 3.4$  Hz), 118.7, 110.7, 87.0 (dd,  $J = 24.1, 13.0$  Hz), 12.7. The NMR spectra were in agreement with that reported in the reference.<sup>26</sup>

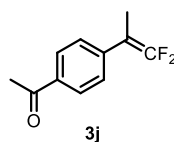

Colorless liquid, 55.9 mg, 0.285 mmol, 95% yield.  $^1\text{H NMR}$  (400 MHz,  $\text{CDCl}_3$ )  $\delta$  7.94 (d,  $J = 8.4$  Hz, 2H), 7.51 – 7.42 (m, 2H), 2.60 (s, 3H), 2.00 (t,  $J = 3.4$  Hz, 3H).  $^{19}\text{F NMR}$  (376 MHz,  $\text{CDCl}_3$ )  $\delta$  -87.39 (d,  $J = 37.4$  Hz), -88.02 (d,  $J = 37.4$  Hz).  $^{13}\text{C NMR}$  (101 MHz,  $\text{CDCl}_3$ )  $\delta$  197.4, 153.9 (dd,  $J = 292.9, 287.9$  Hz), 139.8 (t,  $J = 4.7$  Hz), 135.6, 128.4, 127.5 (dd,  $J = 5.2, 3.4$  Hz), 87.3 (dd,  $J = 23.4, 13.3$  Hz), 26.5, 12.9 (t,  $J = 1.8$  Hz). The NMR spectra were in agreement with that reported in the reference.<sup>6</sup>

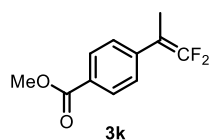

White solid, 62.8 mg, 0.3 mmol, 99% yield.  $^1\text{H NMR}$  (400 MHz,  $\text{CDCl}_3$ )  $\delta$  8.03 (d,  $J = 8.4$  Hz, 2H), 7.50 – 7.41 (m, 2H), 3.93 (d,  $J = 0.7$  Hz, 3H), 2.01 (t,  $J = 3.4$  Hz, 3H).  $^{19}\text{F NMR}$  (376 MHz,  $\text{CDCl}_3$ )  $\delta$  -87.68 (d,  $J = 37.6$  Hz), -88.22 (d,  $J = 37.6$  Hz).  $^{13}\text{C NMR}$  (101 MHz,  $\text{CDCl}_3$ )  $\delta$  166.7, 153.8 (dd,  $J = 292.7, 287.7$  Hz), 139.6 (t,  $J = 4.6$  Hz), 129.8, 129.6, 127.3 (dd,  $J = 5.3, 3.4$  Hz), 87.3 (dd,  $J = 23.3, 13.4$  Hz), 52.1, 12.9 (d,  $J = 1.8$  Hz). **M.P.** 38 - 39 °C. The NMR spectra were in agreement with that reported in the reference.<sup>23</sup>

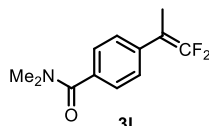

White solid, 62.7 mg, 0.28 mmol, 93% yield.  $^1\text{H NMR}$  (400 MHz,  $\text{CDCl}_3$ )  $\delta$  7.48 – 7.35 (m, 4H), 3.06 (s, 6H), 1.98 (t,  $J = 3.4$  Hz, 3H).  $^{19}\text{F NMR}$  (376 MHz,  $\text{CDCl}_3$ )  $\delta$  -89.06 (d,  $J = 40.9$  Hz), -89.63 (d,  $J = 40.8$  Hz).  $^{13}\text{C NMR}$  (101 MHz,  $\text{CDCl}_3$ )  $\delta$  171.3, 153.7 (dd,  $J = 291.4, 286.9$  Hz), 136.3 (t,  $J = 4.5$  Hz), 134.5, 127.4, 127.3, 87.2 (dd,  $J = 23.1, 13.9$  Hz), 37.6, 13.0. **M.P.** 57 - 58 °C. **ESI-HR** calcd for  $\text{C}_{12}\text{H}_{14}\text{F}_2\text{NO}^+$ : 226.1038, found 226.1041.

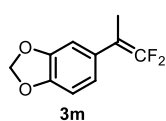

Colorless liquid, 58.0 mg, 0.3 mmol, 99% yield.  $^1\text{H NMR}$  (400 MHz,  $\text{CDCl}_3$ )  $\delta$  6.92 – 6.77 (m, 3H), 5.99 (s, 2H), 1.95 (t,  $J = 3.4$  Hz, 3H).  $^{19}\text{F NMR}$  (376 MHz,  $\text{CDCl}_3$ )  $\delta$  -91.24 (d,  $J = 3.4$  Hz), -91.26 (d,  $J = 3.4$  Hz).  $^{13}\text{C NMR}$  (101 MHz,  $\text{CDCl}_3$ )  $\delta$  153.3 (t,  $J = 287.2$  Hz), 147.6, 146.5, 128.7, 121.0 (t,  $J = 4.0$  Hz), 108.2, 108.1 (t,  $J = 4.2$  Hz), 101.1, 87.3 (dd,  $J = 19.2, 18.4$  Hz), 13.6 (t,  $J = 1.7$  Hz). **ESI-HR** calcd for  $\text{C}_{10}\text{H}_9\text{F}_2\text{O}_2^+$ : 199.0565, found 199.0570.

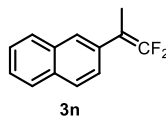

White solid 60.1 mg, 0.29 mmol, 98% yield.  $^1\text{H NMR}$  (400 MHz,  $\text{CDCl}_3$ )  $\delta$  7.84 – 7.70 (m, 4H), 7.53 – 7.40 (m, 3H), 2.04 (t,  $J = 3.4$  Hz, 3H).  $^{19}\text{F NMR}$  (376 MHz,  $\text{CDCl}_3$ )  $\delta$  -89.64 (d,  $J = 42.6$  Hz), -90.28 (d,  $J = 42.9$  Hz). **M.P.** 65 - 66 °C. The NMR spectra were in agreement with that reported in the reference.<sup>27</sup>

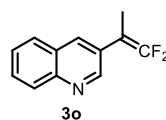

White solid, 61.2 mg, 0.3 mmol, 99% yield.  $^1\text{H NMR}$  (400 MHz,  $\text{CDCl}_3$ )  $\delta$  8.96 (t,  $J = 2.1$  Hz, 1H), 8.22 – 8.00 (m, 2H), 7.90 – 7.73 (m, 1H), 7.70 (ddd,  $J = 8.4, 6.9, 1.5$  Hz, 1H), 7.55 (ddd,  $J = 8.1, 6.9, 1.2$  Hz, 1H), 2.09 (t,  $J = 3.4$  Hz, 3H).  $^{19}\text{F NMR}$  (376 MHz,  $\text{CDCl}_3$ )  $\delta$  -87.92 (d,  $J = 39.5$  Hz), -88.79 (d,  $J = 39.0$  Hz).  $^{13}\text{C NMR}$  (101 MHz,  $\text{CDCl}_3$ )  $\delta$  154.0 (dd,  $J = 291.6, 288.3$  Hz), 149.7 (dd,  $J = 6.5, 2.7$  Hz), 146.9, 133.8 (t,  $J = 4.2$  Hz), 129.5, 129.2, 128.1 (t,  $J = 4.6$  Hz), 127.7, 127.6, 127.0, 85.3 (dd,  $J = 24.4, 14.6$  Hz), 13.0. **M.P.** 65 - 66 °C. The NMR spectra were in agreement with that reported in the reference.<sup>6</sup>

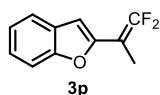

Colorless liquid, 57.8 mg, 0.29 mmol, 98% yield.  $^1\text{H NMR}$  (400 MHz,  $\text{CDCl}_3$ )  $\delta$  7.61 – 7.54 (m, 1H), 7.51 – 7.48 (m, 1H), 7.34 – 7.20 (m, 2H), 6.72 (p,  $J = 0.7$  Hz, 1H), 2.07 (t,  $J = 3.3$  Hz, 3H).  $^{19}\text{F NMR}$  (376 MHz,  $\text{CDCl}_3$ )  $\delta$  -81.04 (d,  $J = 27.3$  Hz), -87.84 (d,  $J = 27.2$  Hz).  $^{13}\text{C NMR}$  (101 MHz,  $\text{CDCl}_3$ )  $\delta$  154.4 (t,  $J = 1.6$  Hz), 154.3 (dd,  $J = 297.7, 287.9$  Hz), 150.7 (dd,  $J = 7.3, 5.6$  Hz), 128.7, 124.1, 122.9, 120.6, 111.0, 103.9 (dd,  $J = 8.5, 6.3$  Hz), 81.8 (dd,  $J = 29.0, 13.2$  Hz), 10.0 (t,  $J = 1.5$  Hz). **M.P.** 42 - 43 °C. **ESI-HR** calcd for  $\text{C}_{11}\text{H}_8\text{F}_2\text{NaO}^+$ : 217.0435, found 217.0439.

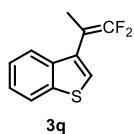

Colorless liquid, 62.5 mg, 0.3 mmol, 99% yield.  $^1\text{H NMR}$  (400 MHz,  $\text{CDCl}_3$ )  $\delta$  7.95 – 7.88 (m, 1H), 7.78 – 7.72 (m, 1H), 7.49 – 7.39 (m, 2H), 7.35 (s, 1H), 2.07 (t,  $J = 3.4$  Hz, 3H).  $^{19}\text{F NMR}$  (376 MHz,  $\text{CDCl}_3$ )  $\delta$  -87.50 (d,  $J = 41.5$  Hz), -91.55 (d,  $J = 41.0$  Hz).  $^{13}\text{C NMR}$  (101 MHz,  $\text{CDCl}_3$ )  $\delta$  153.40 (t,  $J = 287.7$  Hz), 140.0, 137.6, 130.5 (dd,  $J = 4.8, 2.0$  Hz), 124.7 (dd,  $J = 4.2, 1.8$  Hz), 124.5, 124.3, 122.9, 122.7 (d,  $J = 2.6$  Hz), 82.5 (dd,  $J = 25.5, 18.5$  Hz), 14.5. **ESI-HR** calcd for  $\text{C}_{11}\text{H}_8\text{F}_2\text{NaS}^+$ :

233.0207, found 233.0210.

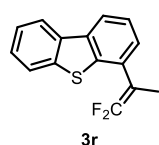

3r

White solid, 77.2 mg, 0.3 mmol, 99% yield.  $^1\text{H NMR}$  (400 MHz,  $\text{CDCl}_3$ )  $\delta$  8.22 – 8.17 (m, 1H), 8.15 (dd,  $J = 7.9, 1.1$  Hz, 1H), 7.95 – 7.85 (m, 1H), 7.54 – 7.47 (m, 3H), 7.39 (dd,  $J = 7.5, 1.1$  Hz, 1H), 2.13 (t,  $J = 3.4$  Hz, 3H).  $^{19}\text{F NMR}$  (376 MHz,  $\text{CDCl}_3$ )  $\delta$  -87.61 (d,  $J = 40.3$  Hz), -92.04 (d,  $J = 40.3$  Hz).  $^{13}\text{C NMR}$  (101 MHz,  $\text{CDCl}_3$ )  $\delta$  153.0 (t,  $J = 288.3$  Hz), 139.3, 139.2, 136.1, 135.7, 130.1 (d,  $J = 5.0$  Hz), 127.1 (t,  $J = 2.5$  Hz), 127.0, 124.8, 124.5, 122.8, 121.8, 121.0, 87.0 (dd,  $J = 24.5, 18.4$  Hz), 13.6. **M.P.** 72 – 73 °C. **ESI-HR** calcd for  $\text{C}_{15}\text{H}_{10}\text{F}_2\text{NaS}^+$ : 283.0363, found 283.0361.

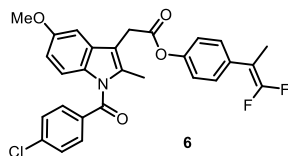

6

White solid, 129.8 mg, 0.255 mmol, 85% yield.  $^1\text{H NMR}$  (400 MHz,  $\text{CDCl}_3$ )  $\delta$  7.75 – 7.67 (m, 2H), 7.55 – 7.47 (m, 2H), 7.37 (dd,  $J = 8.8, 1.1$  Hz, 2H), 7.13 – 7.04 (m, 3H), 6.93 (d,  $J = 9.0$  Hz, 1H), 6.73 (dd,  $J = 9.0, 2.6$  Hz, 1H), 3.93 (s, 2H), 3.87 (s, 3H), 2.48 (s, 3H), 1.97 (t,  $J = 3.4$  Hz, 3H).  $^{19}\text{F NMR}$  (376 MHz,  $\text{CDCl}_3$ )  $\delta$  -89.98 (d,  $J = 42.9$  Hz), -90.46 (d,  $J = 42.9$  Hz).  $^{13}\text{C NMR}$  (101 MHz,  $\text{CDCl}_3$ )  $\delta$  169.3, 168.3, 156.1, 153.5 (dd,  $J = 290.4, 286.2$  Hz), 149.5, 139.4, 136.2, 133.8, 132.6 (t,  $J = 4.3$  Hz), 131.2, 130.9, 130.5, 129.2, 128.5 (dd,  $J = 4.8, 3.4$  Hz), 121.3, 115.0, 111.9, 111.8, 101.2, 86.9 (dd,  $J = 23.3, 14.2$  Hz), 55.8, 30.6, 13.5, 13.3 (t,  $J = 1.9$  Hz). **ESI-HR** calcd for  $\text{C}_{28}\text{H}_{23}\text{ClF}_2\text{NO}_4^+$ : 510.1278, found 510.1281. **IR** (thin film,  $\text{cm}^{-1}$ ) 649, 723, 903, 1091, 1133, 1239, 1317, 1732. **M.P.** 106 – 107 °C.

#### The HDF of trifluoromethyl alkenes **2** to furnish monofluoroalkenes **4**

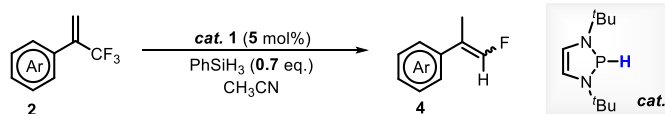

Trifluoromethyl alkenes **2** (0.3 mmol), diazaphospholene **1** (0.015 mmol, 5 mol%),  $\text{PhSiH}_3$  (0.21 mmol) and  $\text{CH}_3\text{CN}$  (1.0 mL) were taken in a Schlenk tube under argon. The mixture was stirred at the specified temperature. The reactions were monitored by  $^{19}\text{F NMR}$  spectra to ensure conversion to desired products. The resulting mixture was cooling down to room temperature and concentrated under vacuum (Note: due to the low boil of products, the solvent was evaporated by the rotary evaporator at about 450 mbar). The crude products were purified by flash column chromatography through a silica plug using petroleum ether as the eluent.

The *E* isomer of the **2s** did not react at all. The yield from the *Z* isomer was determined by  $^{19}\text{F NMR}$ . Spectral data matches the reported data in the literature.<sup>28</sup>

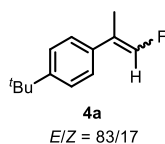

4a  
*E/Z* = 83/17

Colorless liquid, 57.0 mg, 0.3 mmol, 99% yield.  $^1\text{H NMR}$  (400 MHz,  $\text{CDCl}_3$ , major *E* isomer)  $\delta$  7.42 – 7.36 (m, 2H), 7.27 (d,  $J = 8.5$  Hz, 2H), 6.93 (dq,  $J = 85.4, 1.5$  Hz, 1H), 2.06 (dd,  $J = 3.8, 1.6$  Hz, 3H), 1.35 (s, 9H).  $^{19}\text{F NMR}$  (376 MHz,  $\text{CDCl}_3$ )  $\delta$  -129.39 (*Z*), -132.16 (*E*). **ESI-HR** calcd for  $\text{C}_{13}\text{H}_{18}\text{F}^+$ : 193.1387, found 193.1388.

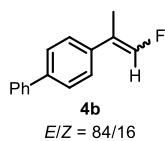

4b  
*E/Z* = 84/16

White solid, 63.1 mg, 0.3 mmol, 99% yield.  $^1\text{H NMR}$  (400 MHz,  $\text{CDCl}_3$ , major *E* isomer)  $\delta$  7.65 – 7.56 (m, 4H), 7.47 (dd,  $J = 8.4, 6.8$  Hz, 2H), 7.44 – 7.37 (m, 3H), 7.00 (dq,  $J = 85.0, 1.6$  Hz, 1H), 2.11 (dd,  $J = 3.8, 1.5$  Hz, 3H).  $^{19}\text{F NMR}$  (376 MHz,  $\text{CDCl}_3$ )  $\delta$  -128.13 (*Z*), -130.84 (*E*).  $^{13}\text{C NMR}$  (101 MHz,  $\text{CDCl}_3$ , major *E* isomer)  $\delta$  146.1 (d,  $J = 258.3$  Hz), 140.6, 140.3, 136.5 (d,  $J = 8.9$  Hz), 128.8, 127.4, 127.3, 127.0, 126.2 (d,  $J = 3.3$  Hz), 119.7 (d,  $J = 10.0$  Hz), 12.2 (d,  $J = 5.9$  Hz). **M.P.** 51 – 52 °C. The NMR spectra were in agreement with that reported in the reference.<sup>29</sup>

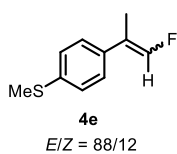

Colorless liquid, 53.9 mg, 0.3 mmol, 99% yield. **<sup>1</sup>H NMR** (400 MHz, CDCl<sub>3</sub>, major *E* isomer) δ 7.26 (s, 4H), 6.93 (dd, *J* = 85.0, 1.6 Hz, 1H), 2.52 (s, 3H), 2.06 (dd, *J* = 3.8, 1.6 Hz, 3H). **<sup>19</sup>F NMR** (376 MHz, CDCl<sub>3</sub>) δ -128.36 (*Z*), -131.40 (*E*). The NMR spectra were in agreement with that reported in the reference.<sup>30</sup>

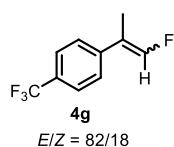

Colorless liquid, 56.3 mg, 0.276 mmol, 92% yield. **<sup>1</sup>H NMR** (400 MHz, CDCl<sub>3</sub>) δ 7.61 (d, *J* = 8.5 Hz, 2H), 7.44 (d, *J* = 8.1 Hz, 2H), 6.98 (dd, *J* = 83.9, 1.7 Hz, 1H), 2.09 (dd, *J* = 3.9, 1.5 Hz, 3H). **<sup>19</sup>F NMR** (376 MHz, CDCl<sub>3</sub>) δ -63.09 (*E*), -63.16 (*Z*), -127.06 (*Z*), -128.50 (*E*). The NMR spectra were in agreement with that reported in the reference.<sup>29</sup>

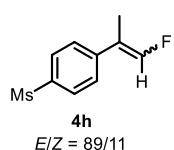

White solid, 63.3 mg, 0.3 mmol, 99% yield. **<sup>1</sup>H NMR** (400 MHz, CDCl<sub>3</sub>, major *E* isomer) δ 7.91 (d, *J* = 8.5 Hz, 2H), 7.50 (d, *J* = 8.5 Hz, 2H), 7.00 (dq, *J* = 83.3, 1.4 Hz, 1H), 3.06 (s, 3H), 2.08 (dd, *J* = 3.8, 1.5 Hz, 3H). **<sup>19</sup>F NMR** (376 MHz, CDCl<sub>3</sub>) δ -124.95 (*Z*), -125.88 (*E*). **M.P.** 59 - 60 °C. **ESI-HR** calcd for C<sub>10</sub>H<sub>11</sub>FN<sub>2</sub>O<sub>2</sub>S<sup>+</sup>: 237.0356, found 237.0354.

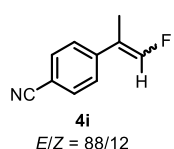

Colorless liquid, 44.4 mg, 0.276 mmol, 92% yield. **<sup>1</sup>H NMR** (400 MHz, CDCl<sub>3</sub>, major *E* isomer) δ 7.64 (d, *J* = 8.4 Hz, 2H), 7.42 (d, *J* = 8.4 Hz, 2H), 7.00 (dq, *J* = 83.2, 1.6 Hz, 1H), 2.07 (dd, *J* = 3.9, 1.5 Hz, 3H). **<sup>19</sup>F NMR** (376 MHz, CDCl<sub>3</sub>) δ -124.46 (*Z*), -126.12 (*E*). The NMR spectra were in agreement with that reported in the reference.<sup>30</sup>

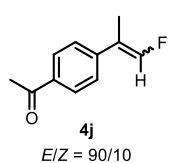

Colorless liquid, 49.7 mg, 0.28 mmol, 93% yield. **<sup>1</sup>H NMR** (400 MHz, CDCl<sub>3</sub>, major *E* isomer) δ 7.94 (d, *J* = 8.4 Hz, 2H), 7.41 (d, *J* = 8.5 Hz, 2H), 7.01 (dq, *J* = 83.9, 1.5 Hz, 1H), 2.61 (s, 3H), 2.08 (dd, *J* = 3.8, 1.5 Hz, 3H). **<sup>19</sup>F NMR** (376 MHz, CDCl<sub>3</sub>) δ -125.62 (*Z*), -127.62 (*E*). **<sup>13</sup>C NMR** (101 MHz, CDCl<sub>3</sub>, major *E* isomer) δ 197.5, 147.2 (d, *J* = 261.4 Hz), 142.4 (d, *J* = 9.2 Hz), 136.0 (d, *J* = 1.4 Hz), 128.7, 125.8 (d, *J* = 3.3 Hz), 119.5 (d, *J* = 10.6 Hz), 26.5, 11.9 (d, *J* = 6.0 Hz). **ESI-HR** calcd for C<sub>11</sub>H<sub>11</sub>FN<sub>2</sub>O<sup>+</sup>: 201.0686, found 201.0687.

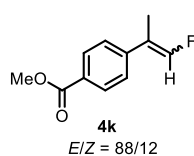

Colorless liquid, 53.5 mg, 0.276 mmol, 92% yield. **<sup>1</sup>H NMR** (400 MHz, CDCl<sub>3</sub>) δ 8.01 (d, *J* = 8.2 Hz, 2H), 7.38 (d, *J* = 8.2 Hz, 2H), 7.01 (d, *J* = 83.3 Hz, 1H), 3.93 (s, 3H), 2.07 (dd, *J* = 4.0, 1.4 Hz, 3H). **<sup>19</sup>F NMR** (376 MHz, CDCl<sub>3</sub>) δ -125.83 (*Z*), -128.00 (*E*). **<sup>13</sup>C NMR** (101 MHz, CDCl<sub>3</sub>, major *E* isomer) δ 166.8, 147.1 (d, *J* = 260.8 Hz), 142.2 (d, *J* = 9.1 Hz), 129.9, 129.1, 125.6 (d, *J* = 3.3 Hz), 119.6 (d, *J* = 10.5 Hz), 52.1, 11.9 (d, *J* = 6.0 Hz). **M.P.** 40 - 41 °C. **ESI-HR** calcd for C<sub>11</sub>H<sub>11</sub>FN<sub>2</sub>O<sub>2</sub><sup>+</sup>: 217.0635, found 217.0632.

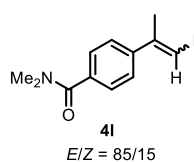

White solid, 61.8 mg, 0.3 mmol, 99% yield. **<sup>1</sup>H NMR** (400 MHz, CDCl<sub>3</sub>, major *E* isomer) δ 7.39 (d, *J* = 8.3 Hz, 2H), 7.33 (d, *J* = 8.3 Hz, 2H), 6.93 (dq, *J* = 84.4, 1.5 Hz, 1H), 3.11 (s, 3H), 3.00 (s, 3H), 2.04 (dd, *J* = 3.8, 1.5 Hz, 3H). **<sup>19</sup>F NMR** (376 MHz, CDCl<sub>3</sub>) δ -127.51 (*Z*), -129.60 (*E*). **<sup>13</sup>C NMR** (101 MHz, CDCl<sub>3</sub>, major *E* isomer) δ 171.2, 146.5 (d, *J* = 259.4 Hz), 138.9 (d, *J* = 9.0 Hz), 135.3, 127.5, 125.7 (d, *J* = 3.3 Hz), 119.6 (d, *J* = 10.3 Hz), 39.6, 35.4, 12.1 (d, *J* = 5.9 Hz). **M.P.** 60 - 61 °C. **ESI-HR** calcd for C<sub>12</sub>H<sub>14</sub>FNN<sub>2</sub>O<sup>+</sup>: 230.0952, found 230.0946.

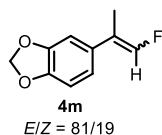

Colorless liquid, 53.4 mg, 0.3 mmol, 99% yield.  $^1\text{H NMR}$  (400 MHz,  $\text{CDCl}_3$ , major *E* isomer)  $\delta$  6.85 (dd,  $J = 85.2, 1.5$  Hz, 4H), 6.83 – 6.77 (m, 3H), 5.98 (s, 2H), 2.02 (dd,  $J = 3.8, 1.6$  Hz, 3H).  $^{19}\text{F NMR}$  (376 MHz,  $\text{CDCl}_3$ )  $\delta$  -129.33 (*Z*), -132.17 (*E*). The NMR spectra were in agreement with that reported in the reference.<sup>30</sup>

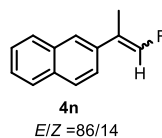

White solid, 55.2 mg, 0.3 mmol, 99% yield.  $^1\text{H NMR}$  (400 MHz,  $\text{CDCl}_3$ , major *E* isomer)  $\delta$  7.91 – 7.75 (m, 4H), 7.58 – 7.45 (m, 3H), 7.09 (dq,  $J = 84.9, 1.5$  Hz, 1H), 2.19 (dd,  $J = 3.8, 1.5$  Hz, 3H).  $^{19}\text{F NMR}$  (376 MHz,  $\text{CDCl}_3$ )  $\delta$  -128.37 (*Z*), -130.39 (*E*). **M.P.** 59 - 60 °C. The NMR spectra were in agreement with that reported in the reference.<sup>30</sup>

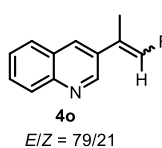

White solid, 55.6 mg, 0.3 mmol, 99% yield.  $^1\text{H NMR}$  (400 MHz,  $\text{CDCl}_3$ , major *E* isomer)  $\delta$  8.90 (d,  $J = 2.3$  Hz, 1H), 8.08 (d,  $J = 8.5$  Hz, 1H), 7.99 (d,  $J = 2.3$  Hz, 1H), 7.84 – 7.78 (m, 1H), 7.73 – 7.62 (m, 1H), 7.59 – 7.49 (m, 1H), 7.08 (dd,  $J = 83.5, 1.6$  Hz, 1H), 2.15 (dd,  $J = 3.7, 1.5$  Hz, 3H).  $^{19}\text{F NMR}$  (376 MHz,  $\text{CDCl}_3$ )  $\delta$  -126.13 (*Z*), -127.10 (*E*). **M.P.** 55 - 56 °C. **ESI-HR** calcd for  $\text{C}_{12}\text{H}_{11}\text{FN}^+$ : 188.0870, found 188.0865.

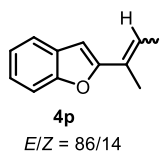

White solid, 40.6 mg, 0.23 mmol, 77% yield.  $^1\text{H NMR}$  (400 MHz,  $\text{CDCl}_3$ , *E* isomer)  $\delta$  7.51 – 7.46 (m, 1H), 7.43 (d,  $J = 84.0$  Hz, 1H), 7.39 (d,  $J = 8.1$  Hz, 1H), 7.28 – 7.21 (m, 1H), 7.18 (t,  $J = 7.5$  Hz, 1H), 6.58 (s, 1H), 2.01 (dd,  $J = 3.5, 1.4$  Hz, 3H).  $^{19}\text{F NMR}$  (376 MHz,  $\text{CDCl}_3$ , *E* isomer)  $\delta$  -132.54.  $^{13}\text{C NMR}$  (101 MHz,  $\text{CDCl}_3$ , *E* isomer)  $\delta$  154.4, 154.1 (d,  $J = 8.8$  Hz), 148.2 (d,  $J = 261.7$  Hz), 128.6, 124.4, 122.8, 120.5, 111.3 (d,  $J = 15.0$  Hz), 110.8, 103.0 (d,  $J = 10.0$  Hz), 9.5 (d,  $J = 5.6$  Hz). White solid, 6.3 mg, 0.036 mmol, 12% yield.  $^1\text{H NMR}$  (400 MHz,  $\text{CDCl}_3$ , *Z* isomer)  $\delta$  7.57 (dd,  $J = 7.8, 2.9$  Hz, 1H), 7.48 (dd,  $J = 8.2, 2.9$  Hz, 1H), 7.30 – 7.13 (m, 2H), 6.95 (s, 1H), 6.70 (d,  $J = 80.0$  Hz, 1H), 2.03 – 1.94 (m, 3H).  $^{19}\text{F NMR}$  (376 MHz,  $\text{CDCl}_3$ , *Z* isomer)  $\delta$  -120.12. **M.P.** 45 - 46 °C. **ESI-HR** calcd for  $\text{C}_{11}\text{H}_9\text{FNaO}^+$ : 199.0530, found 199.0532.

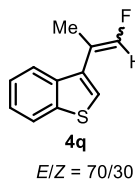

Colorless liquid, 46.0 mg, 0.24 mmol, 80% yield.  $^1\text{H NMR}$  (400 MHz,  $\text{CDCl}_3$ , major *E* isomer)  $\delta$  7.93 – 7.86 (m, 3H), 7.47 – 7.39 (m, 3H), 7.28 (s, 1H), 6.94 (d,  $J = 85.1$  Hz, 1H), 2.17 (dd,  $J = 3.7, 1.5$  Hz, 3H).  $^{19}\text{F NMR}$  (376 MHz,  $\text{CDCl}_3$ )  $\delta$  -124.65 (*Z*), -128.26 (*E*). **ESI-HR** calcd for  $\text{C}_{11}\text{H}_9\text{FNaO}^+$ : 215.0301, found 215.0308.

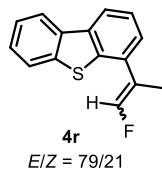

White solid, 46.5 mg, 0.19 mmol, 64% yield for *E* isomer of **4r**.  $^1\text{H NMR}$  (400 MHz,  $\text{CDCl}_3$ , *E* isomer)  $\delta$  8.22 – 8.15 (m, 1H), 8.12 (dd,  $J = 7.8, 1.1$  Hz, 1H), 7.93 – 7.84 (m, 1H), 7.54 – 7.46 (m, 3H), 7.35 (dd,  $J = 7.4, 1.2$  Hz, 1H), 7.06 (dq,  $J = 84.5, 1.6$  Hz, 1H), 2.22 (dd,  $J = 3.8, 1.6$  Hz, 3H).  $^{19}\text{F NMR}$  (376 MHz,  $\text{CDCl}_3$ )  $\delta$  -125.12 (*Z*), -128.23 (*E*).  $^{13}\text{C NMR}$  (101 MHz,  $\text{CDCl}_3$ , *E* isomer)  $\delta$  147.72 (d,  $J = 262.0$  Hz), 139.3, 138.7 (d,  $J = 2.5$  Hz), 136.1, 135.7, 133.0 (d,  $J = 9.9$  Hz), 126.9, 126.3 (d,  $J = 3.4$  Hz), 124.8, 124.5, 122.7, 121.7, 120.7, 119.7 (d,  $J = 10.5$  Hz), 13.2 (d,  $J = 5.0$  Hz). **M.P.** 67 - 68 °C. **ESI-HR** calcd for  $\text{C}_{15}\text{H}_{11}\text{FNaS}^+$ : 265.0458, found 265.0460.

## NMR spectra

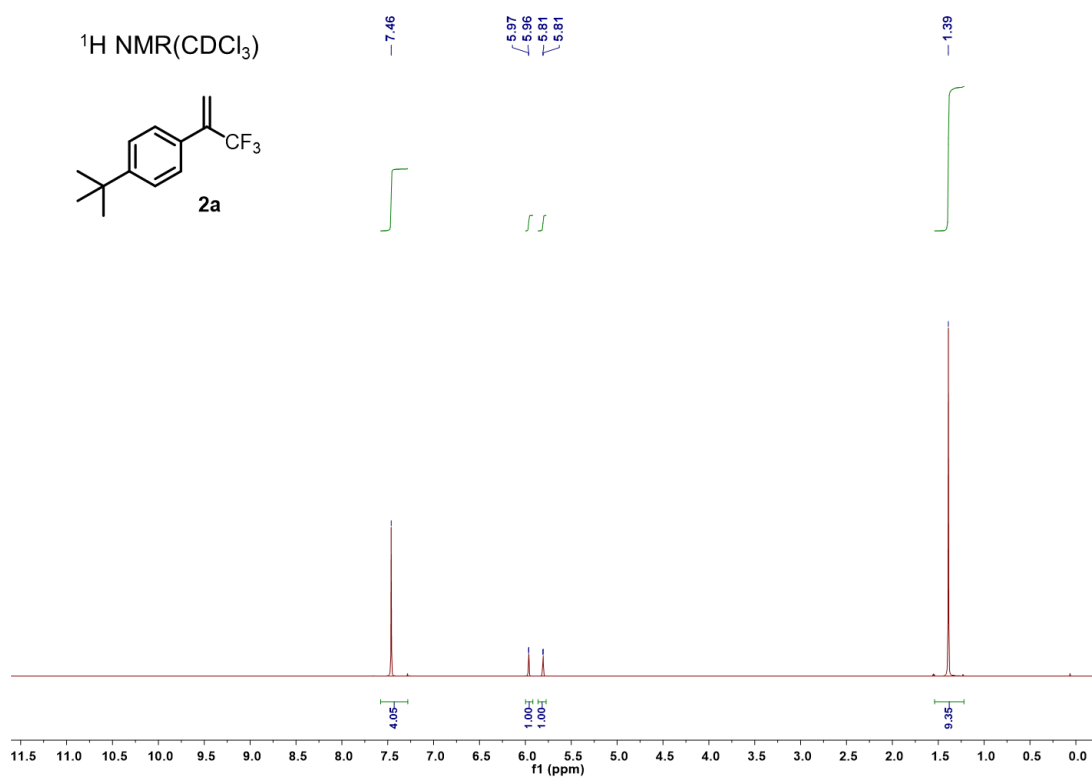

Supplementary Figure 6. <sup>1</sup>H NMR Spectrum of **2a**.

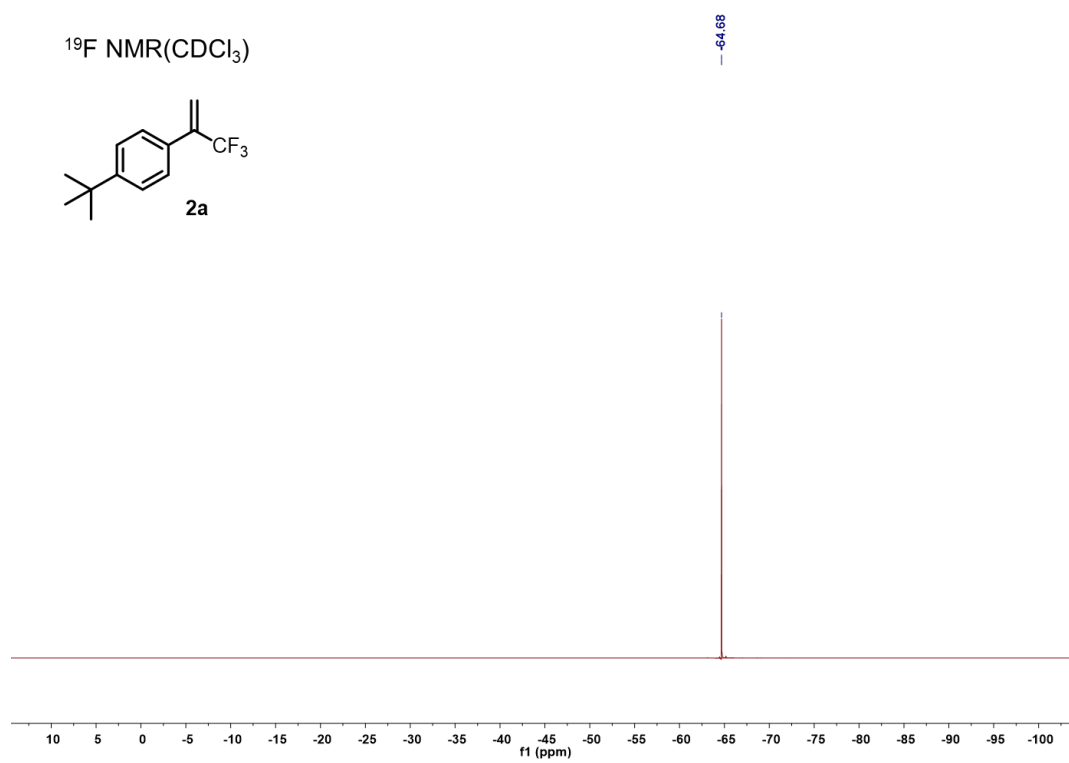

Supplementary Figure 7. <sup>19</sup>F NMR Spectrum of **2a**.

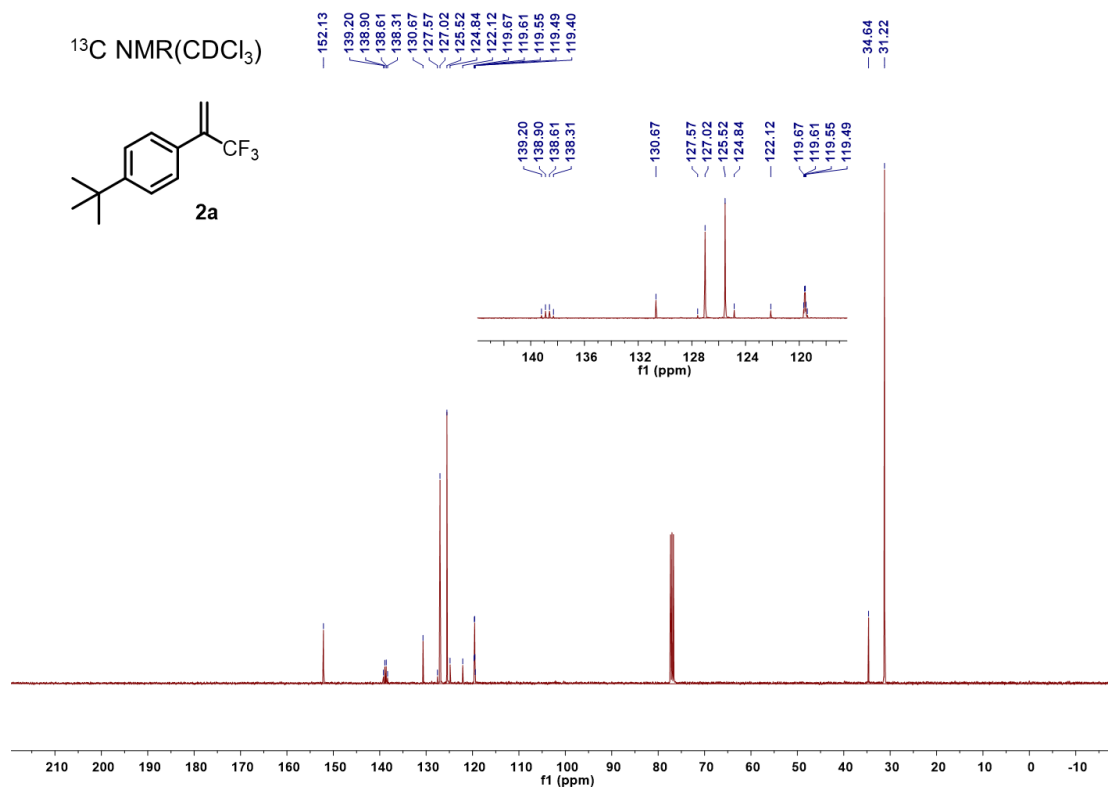

Supplementary Figure 8. <sup>13</sup>C NMR Spectrum of **2a**.

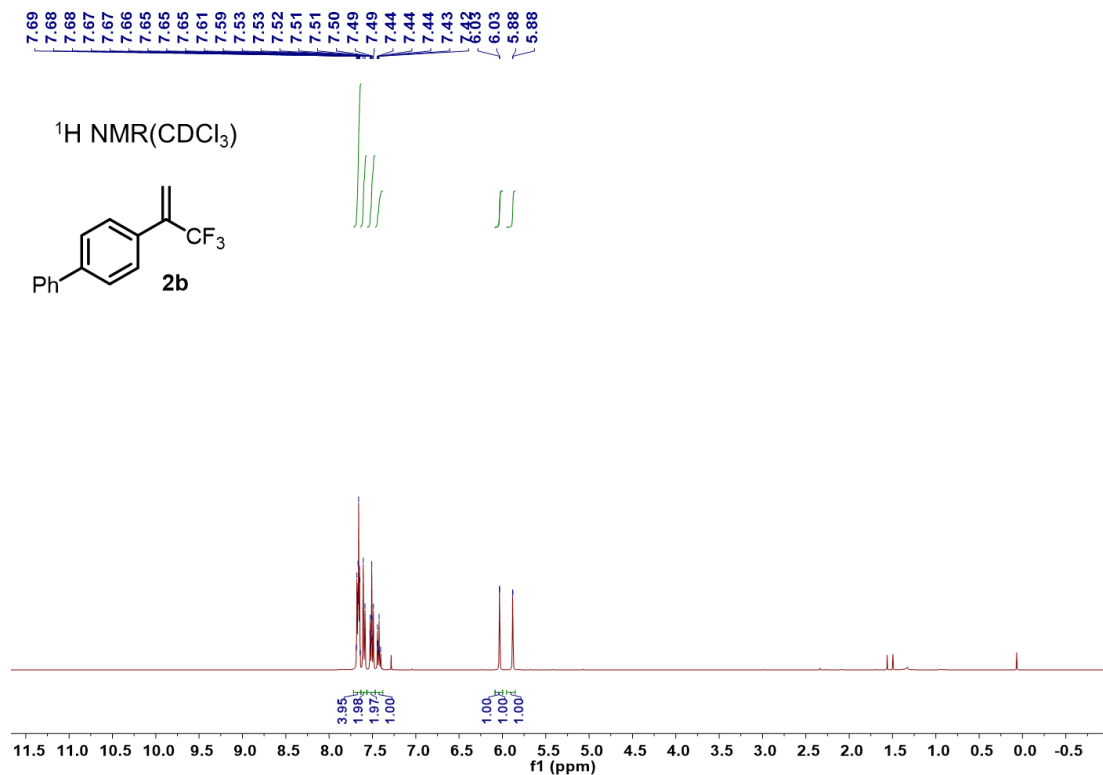

Supplementary Figure 9. <sup>1</sup>H NMR Spectrum of **2b**.

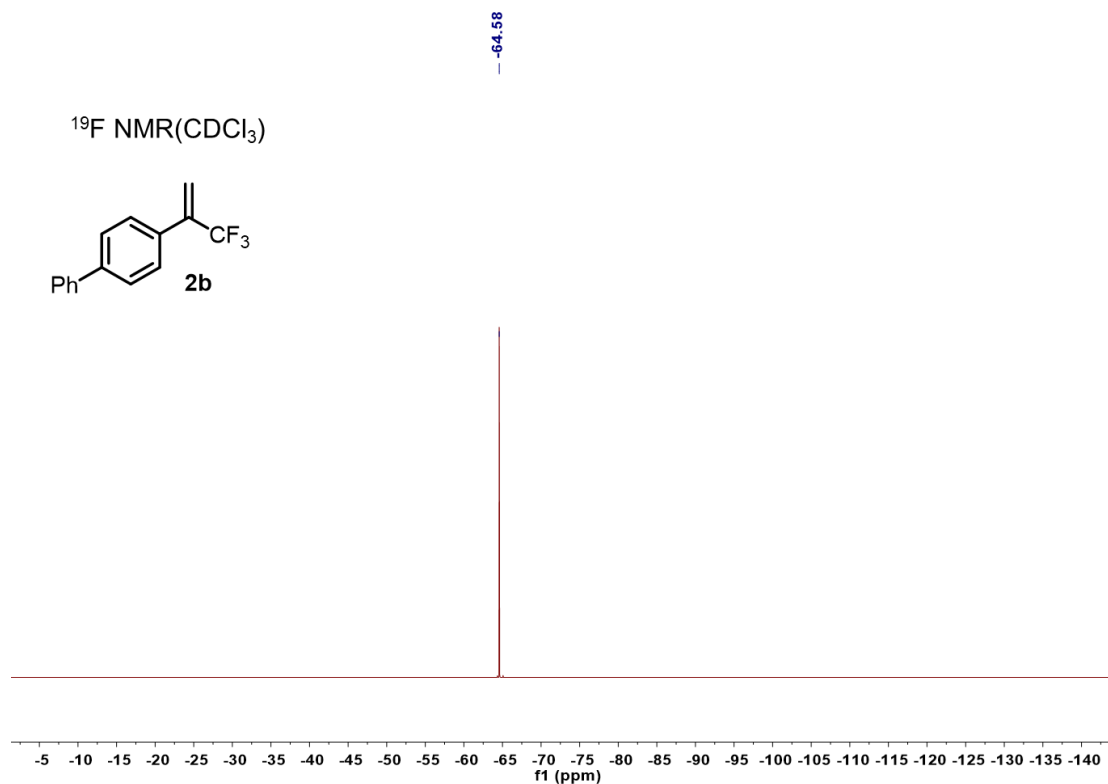

Supplementary Figure 10. <sup>19</sup>F NMR Spectrum of **2b**.

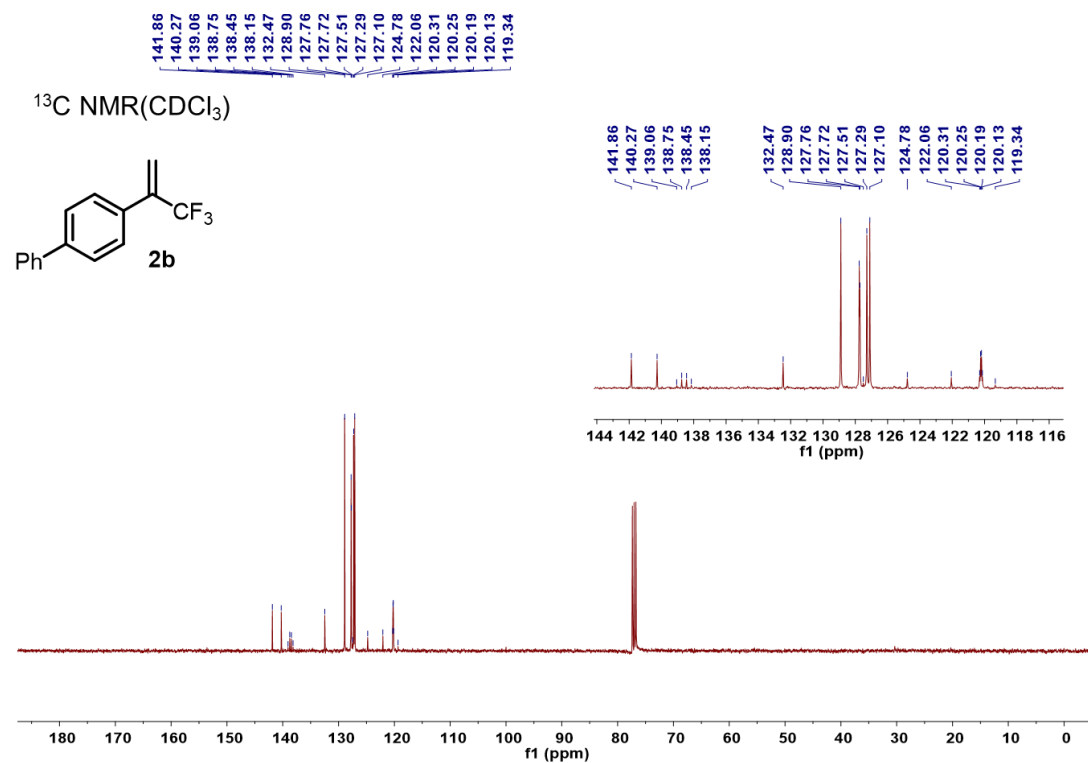

Supplementary Figure 11. <sup>13</sup>C NMR Spectrum of **2b**.



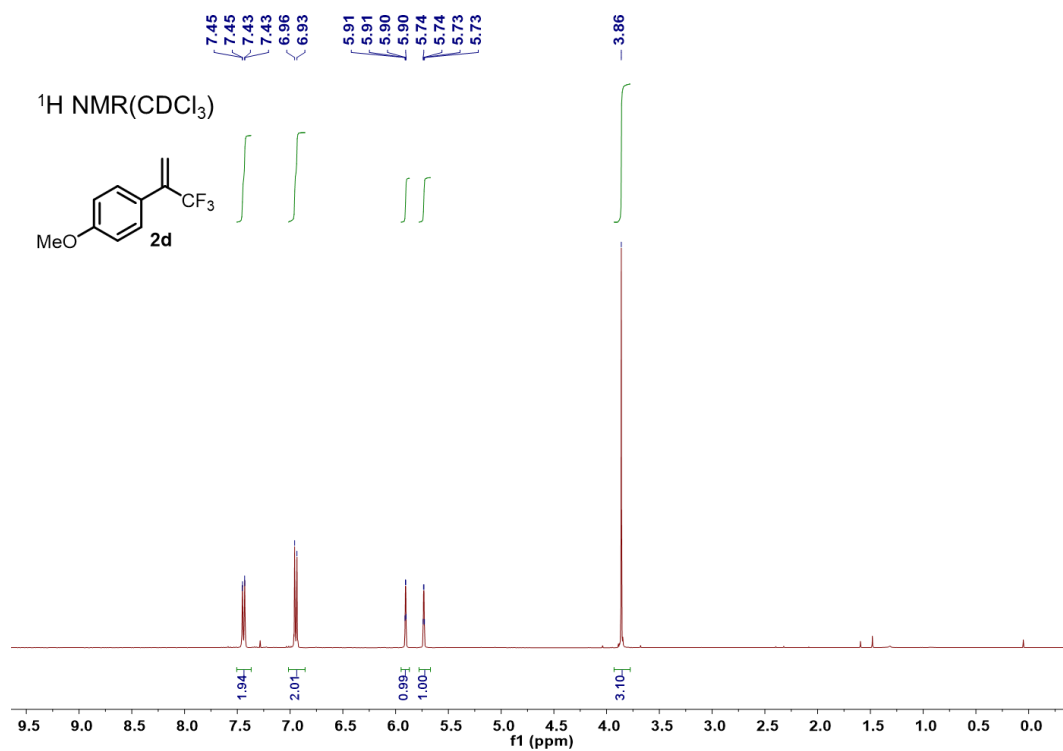

Supplementary Figure 12. <sup>1</sup>H NMR Spectrum of **2d**.

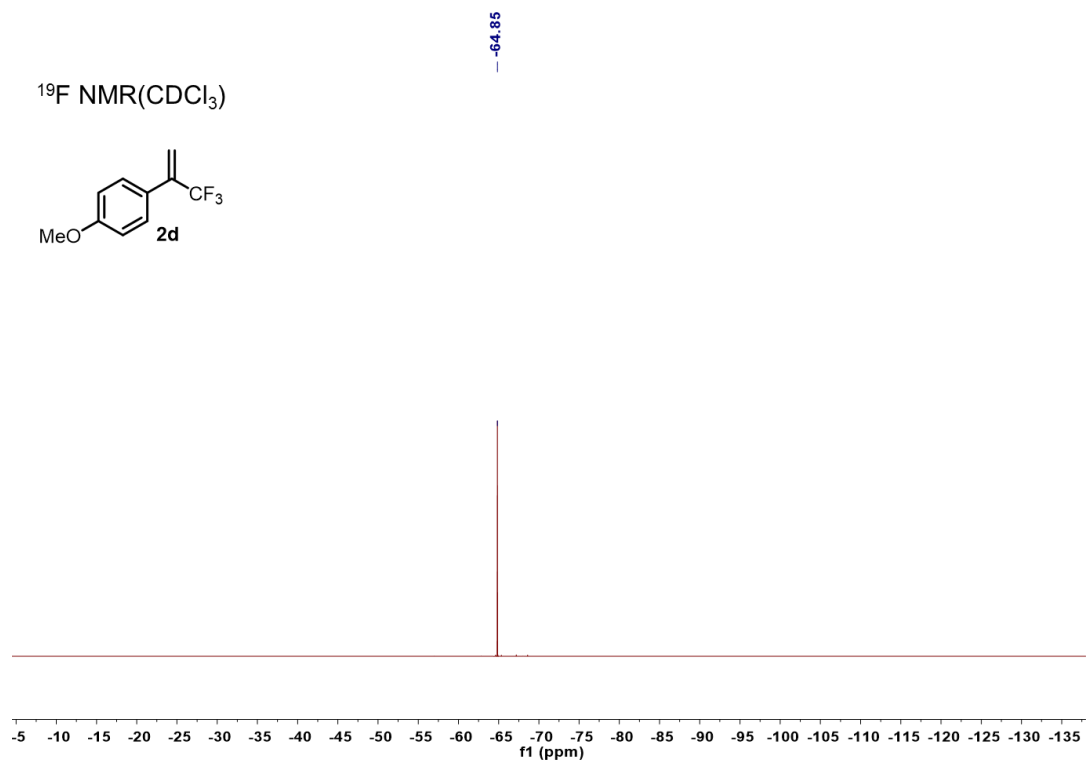

Supplementary Figure 13. <sup>19</sup>F NMR Spectrum of **2d**.

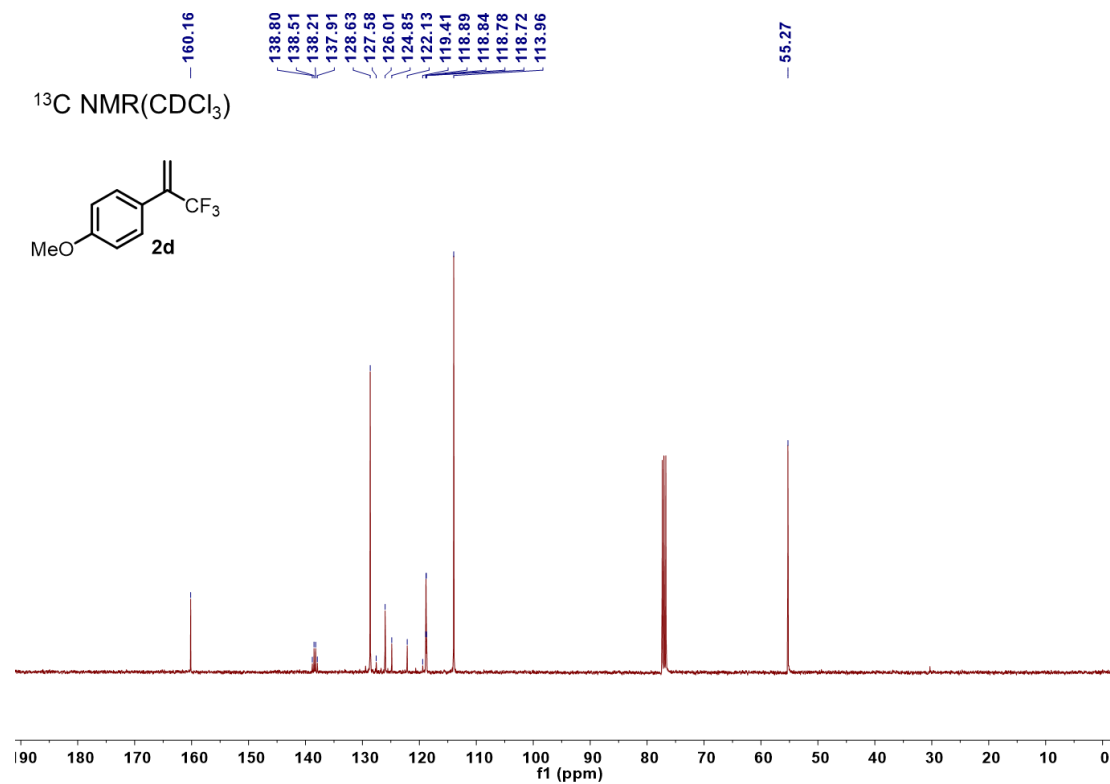

Supplementary Figure 14. <sup>13</sup>C NMR Spectrum of **2d**.

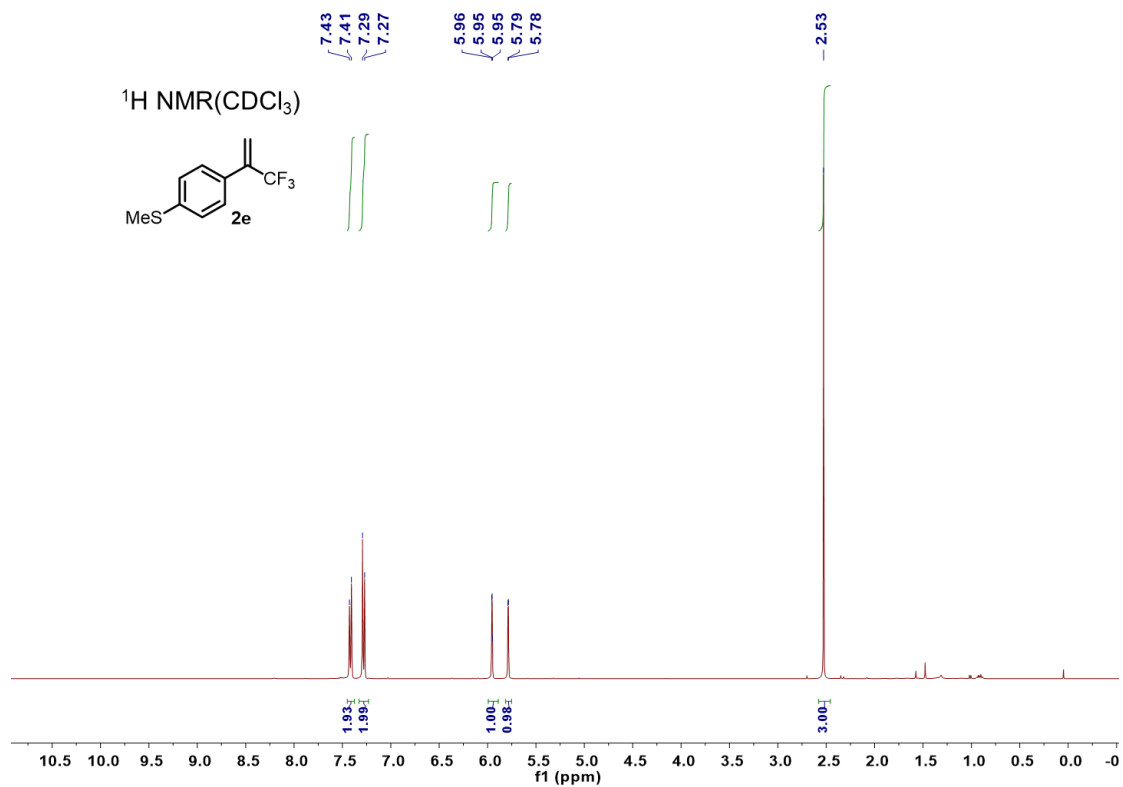

Supplementary Figure 15. <sup>1</sup>H NMR Spectrum of **2e**.

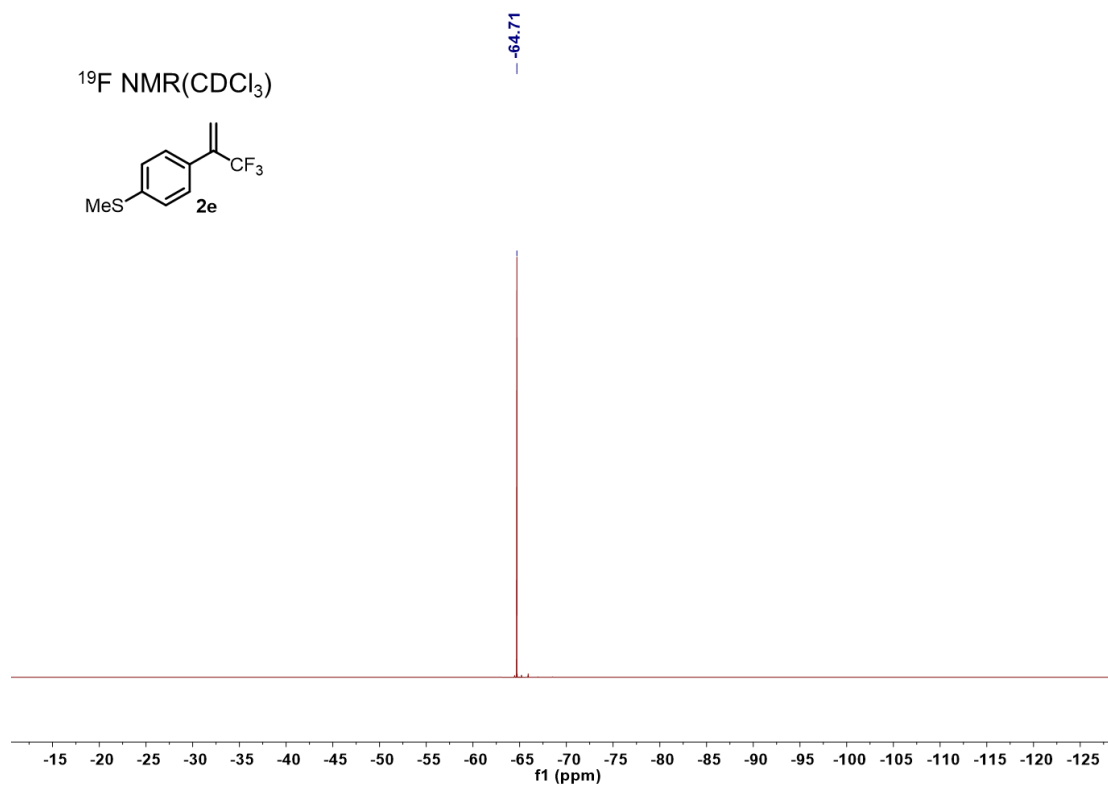

Supplementary Figure 16. <sup>19</sup>F NMR Spectrum of 2e.

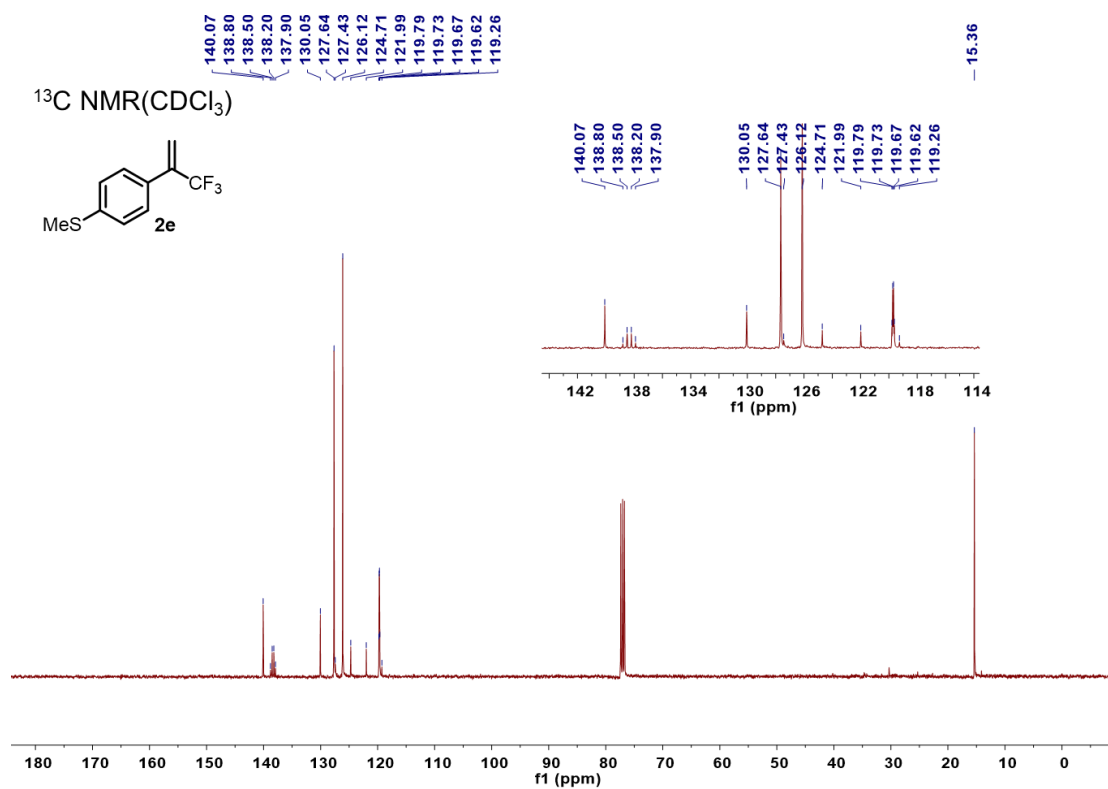

Supplementary Figure 17. <sup>13</sup>C NMR Spectrum of 2e.

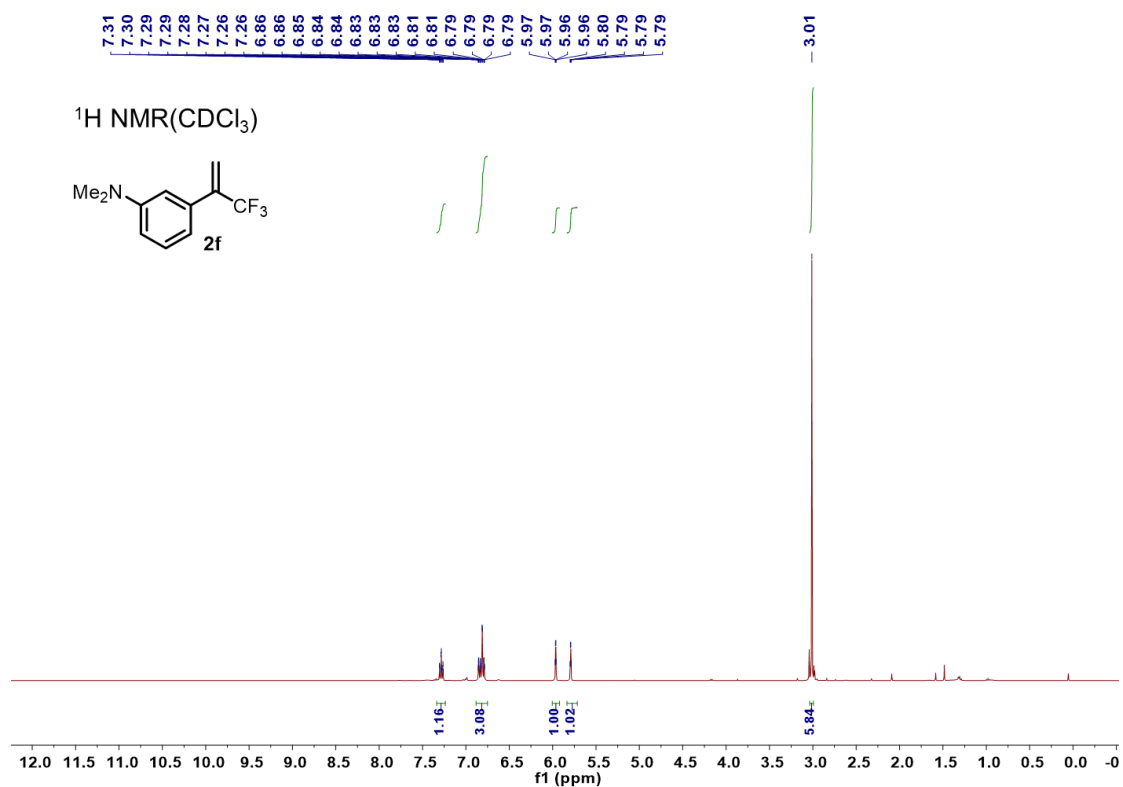

Supplementary Figure 18. <sup>1</sup>H NMR Spectrum of 2f.

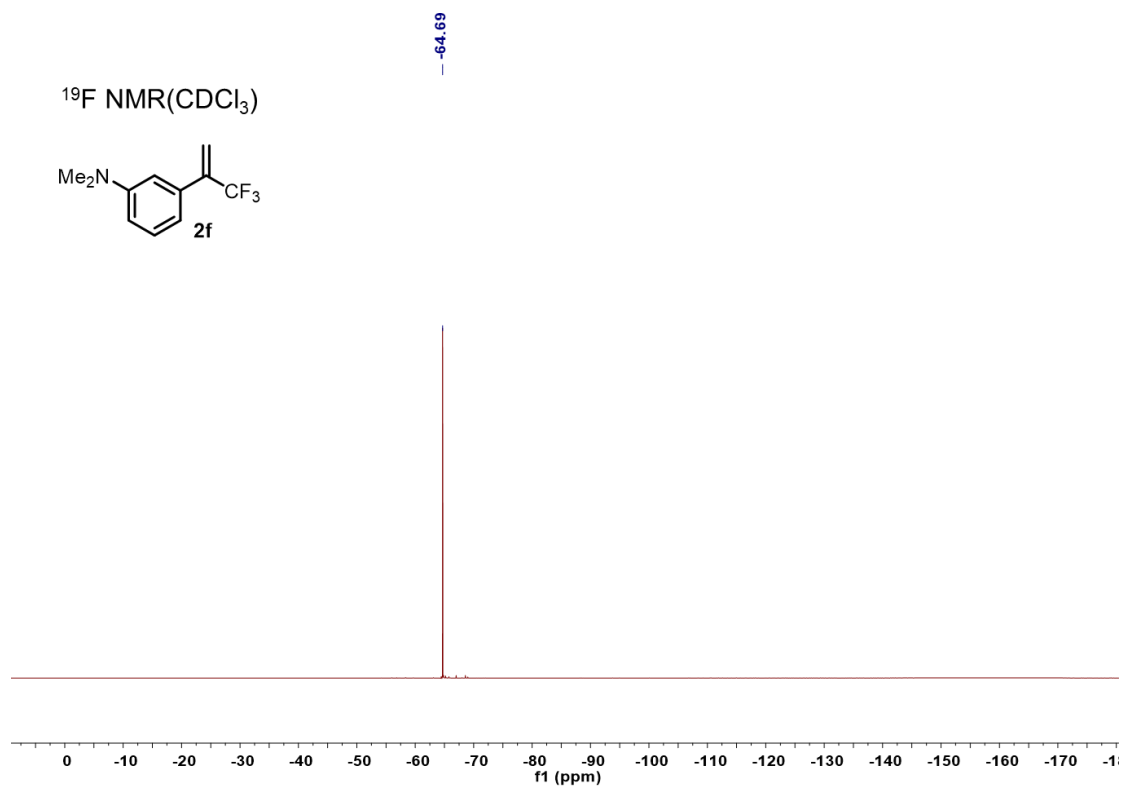

Supplementary Figure 19. <sup>19</sup>F NMR Spectrum of 2f.

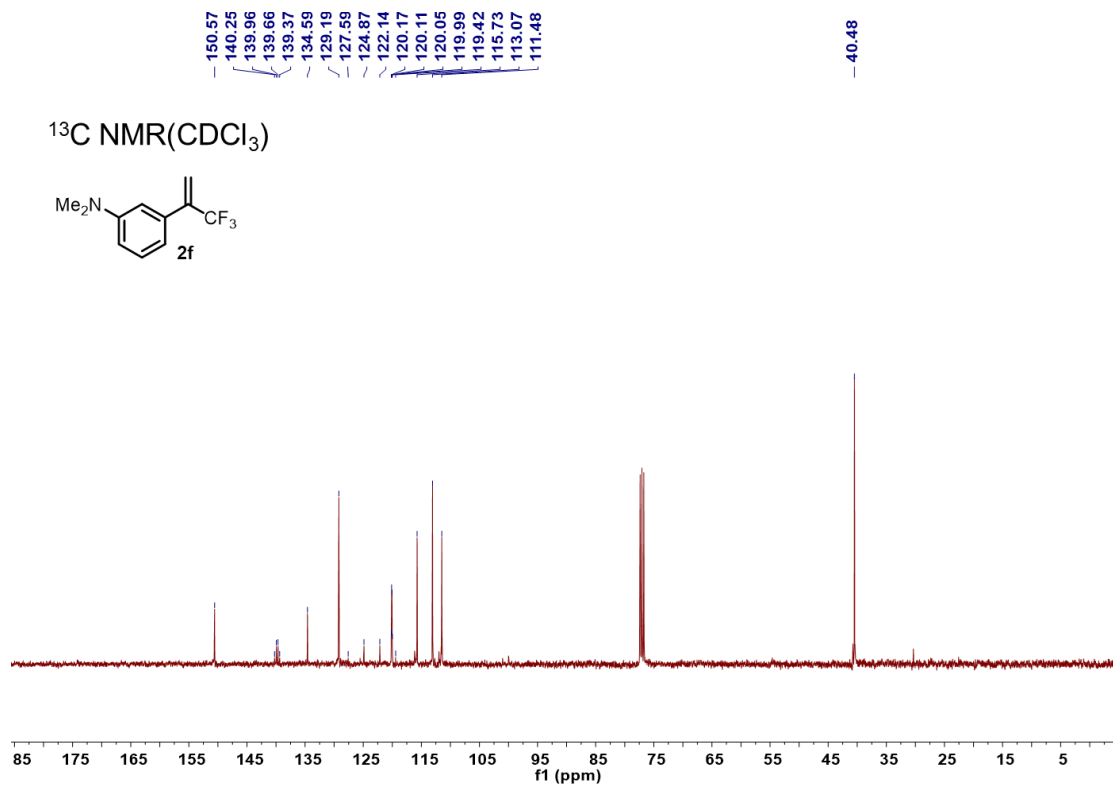

Supplementary Figure 20. <sup>13</sup>C NMR Spectrum of 2f.

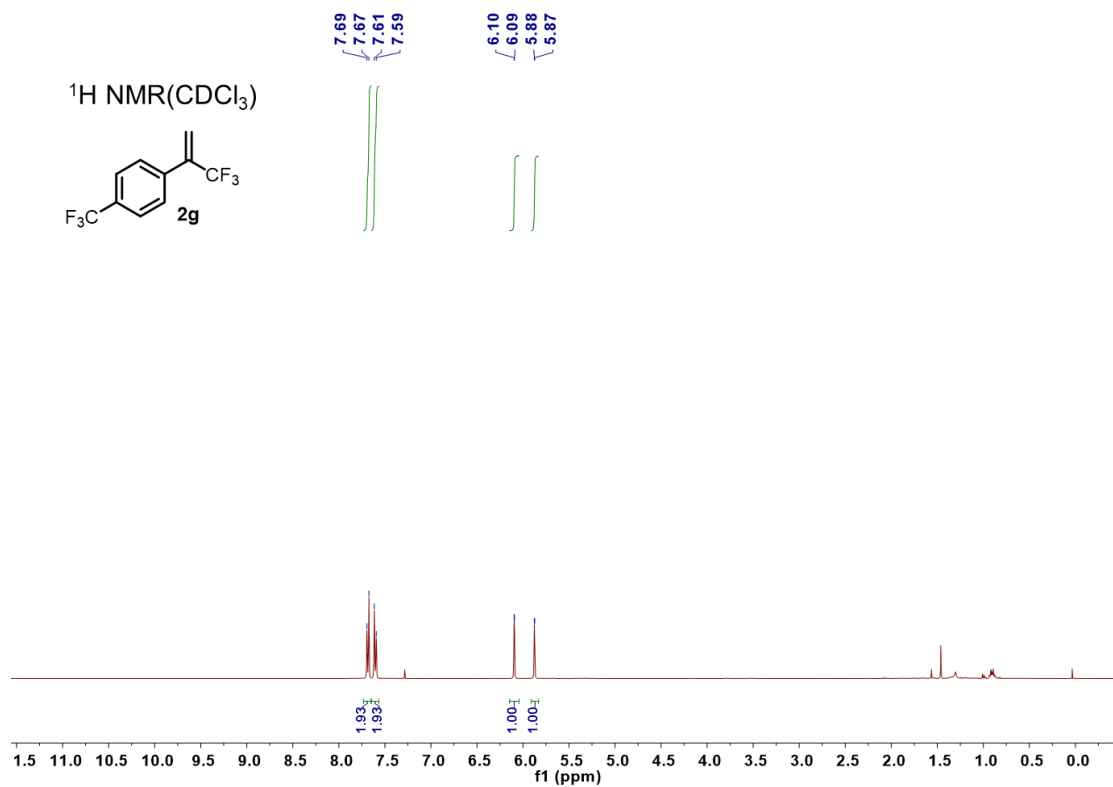

Supplementary Figure 21. <sup>1</sup>H NMR Spectrum of 2g.

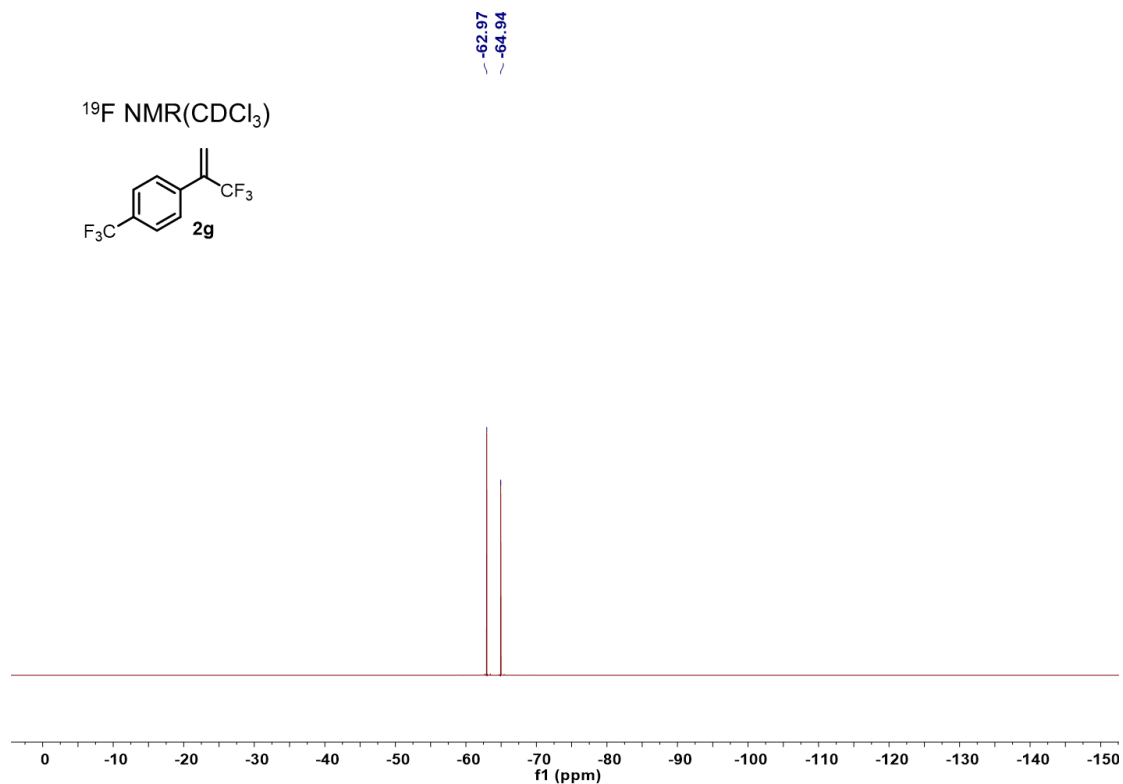

Supplementary Figure 22. <sup>19</sup>F NMR Spectrum of **2g**.

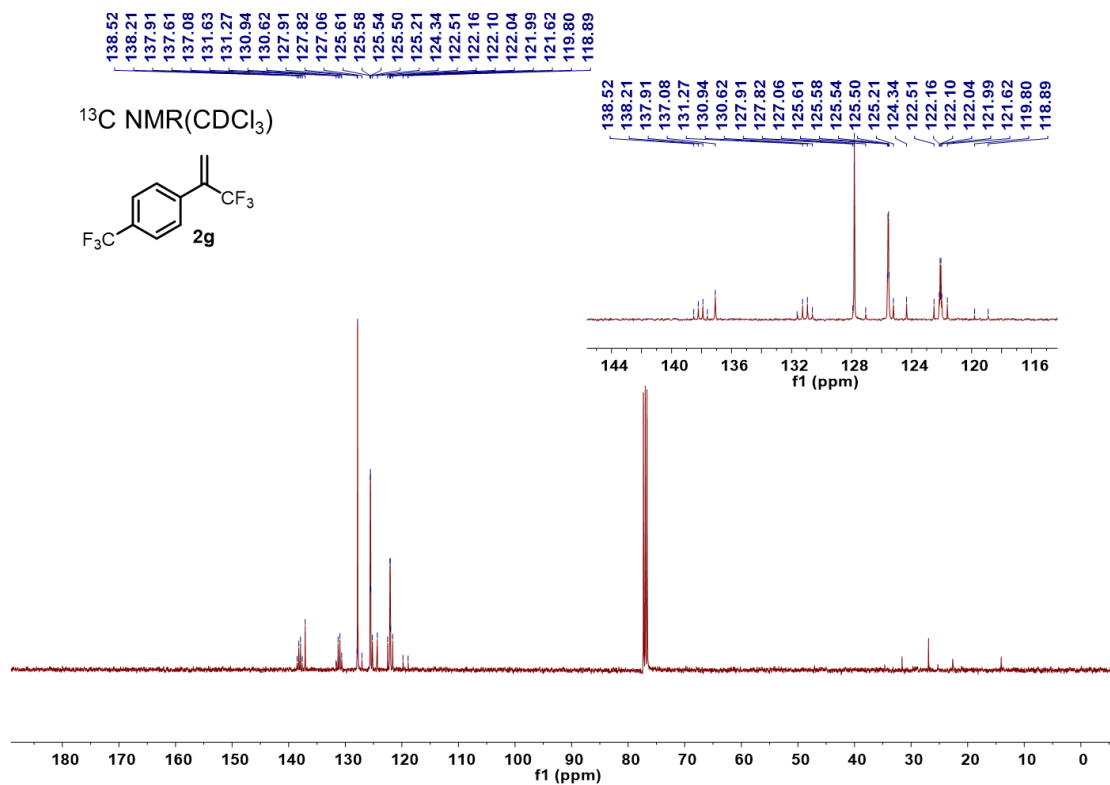

Supplementary Figure 23. <sup>13</sup>C NMR Spectrum of **2g**.

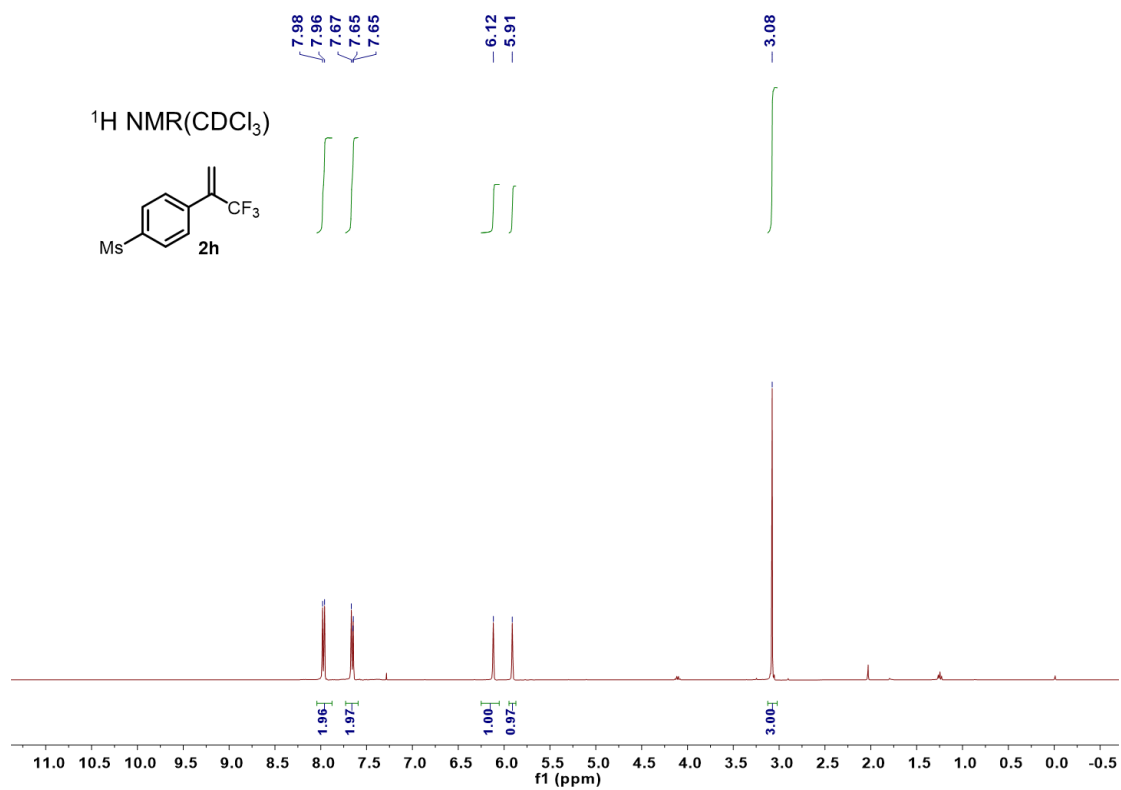

Supplementary Figure 24. <sup>1</sup>H NMR Spectrum of 2h.

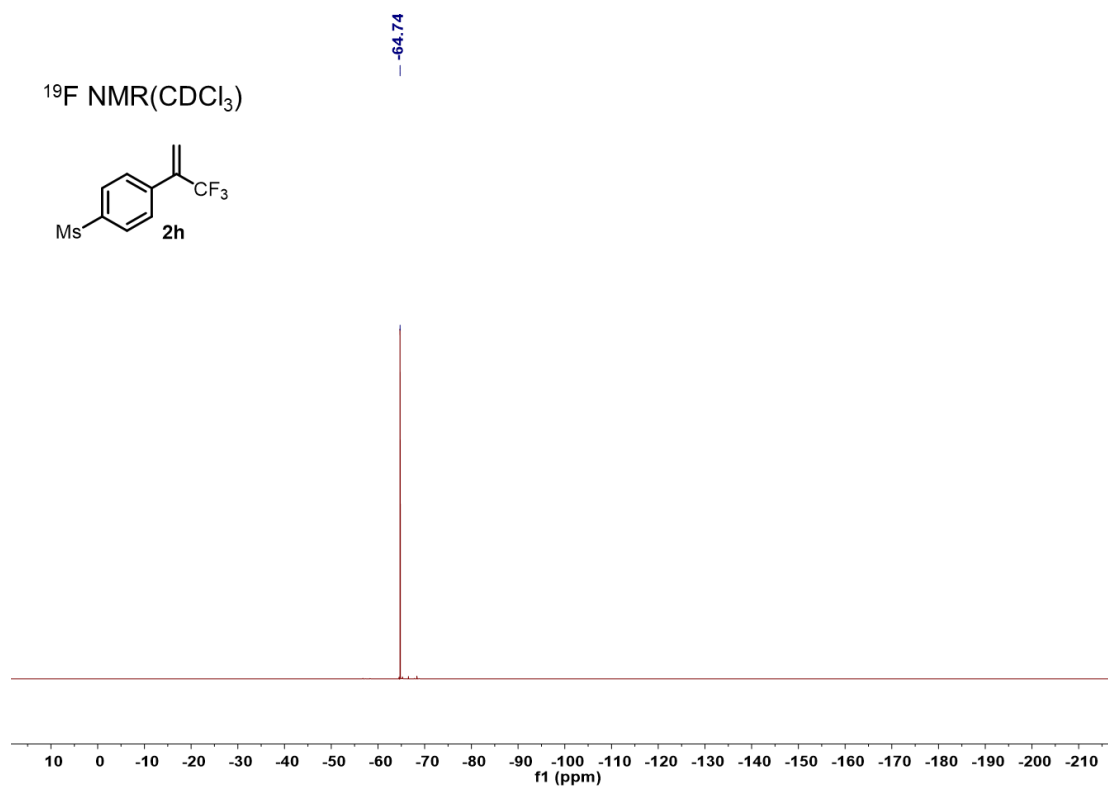

Supplementary Figure 25. <sup>19</sup>F NMR Spectrum of 2h.

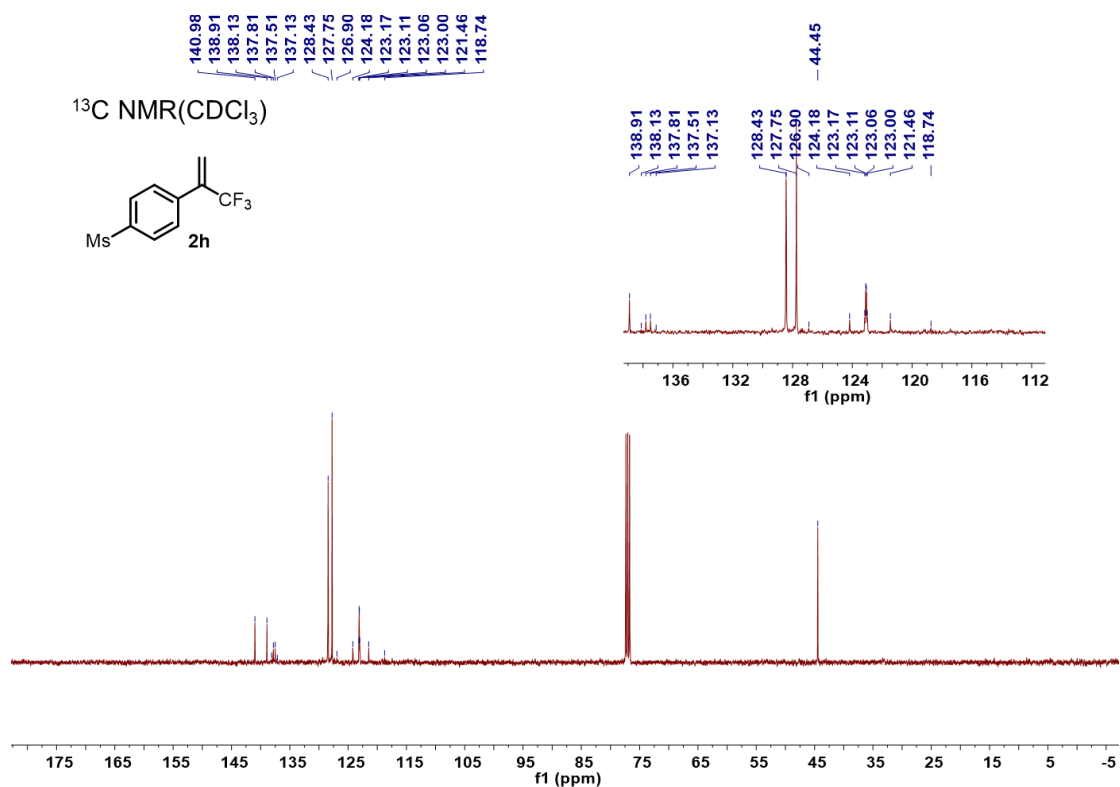

Supplementary Figure 26. <sup>13</sup>C NMR Spectrum of **2h**.

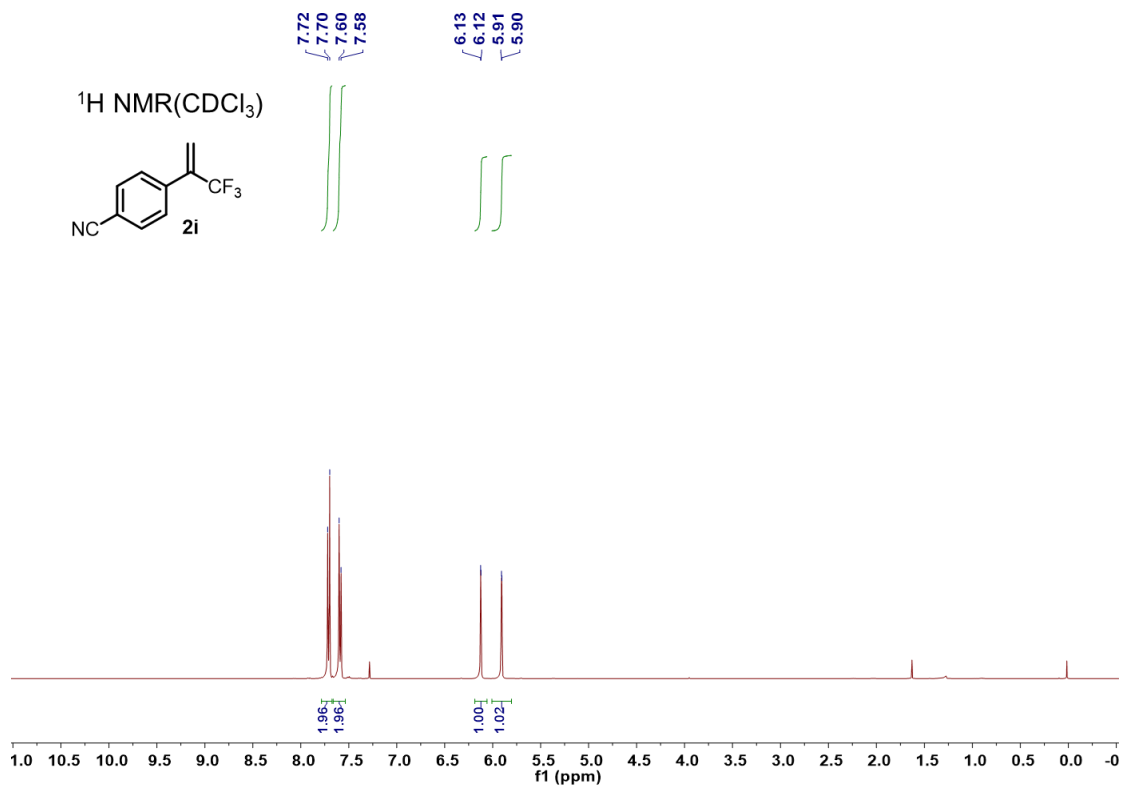

Supplementary Figure 27. <sup>1</sup>H NMR Spectrum of **2i**.



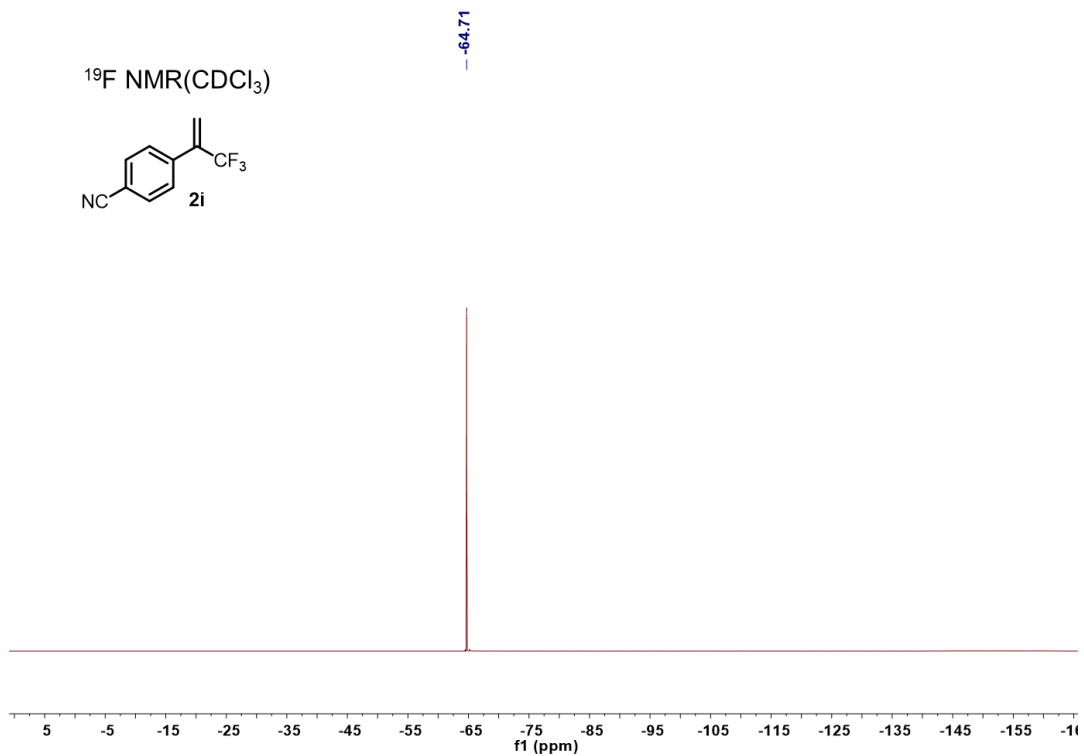

Supplementary Figure 28. <sup>19</sup>F NMR Spectrum of 2i.

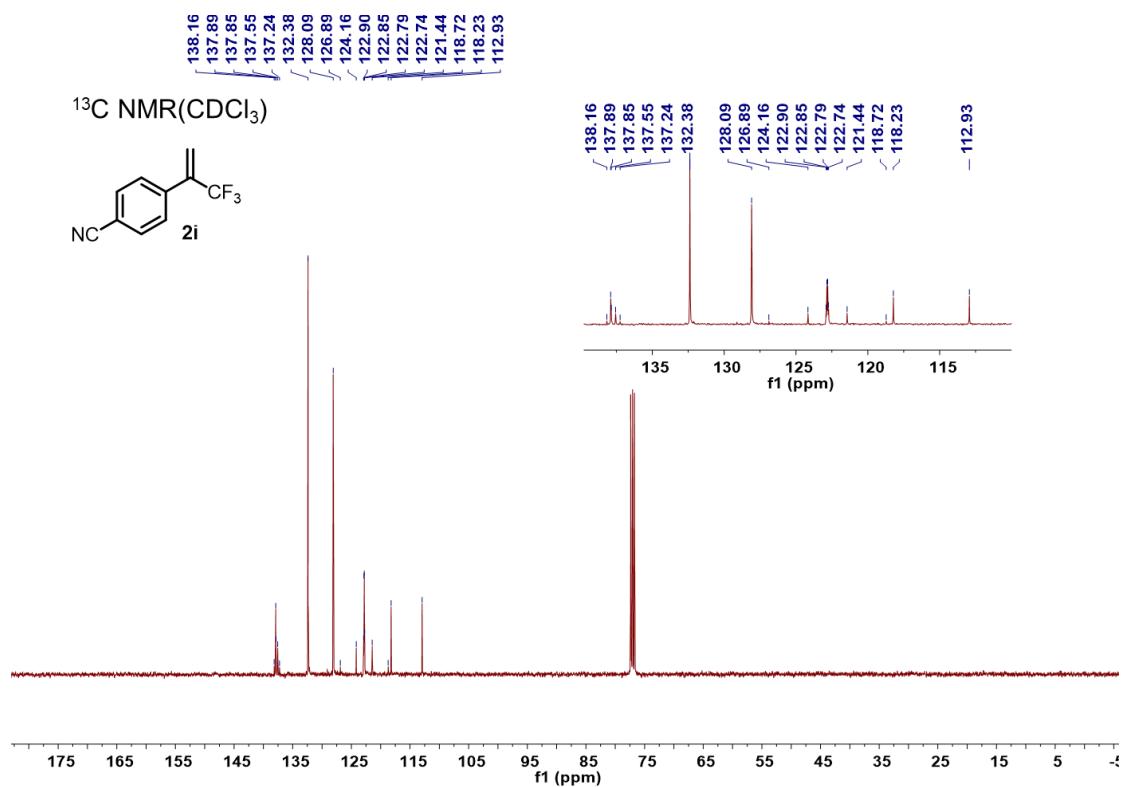

Supplementary Figure 29. <sup>13</sup>C NMR Spectrum of 2i.

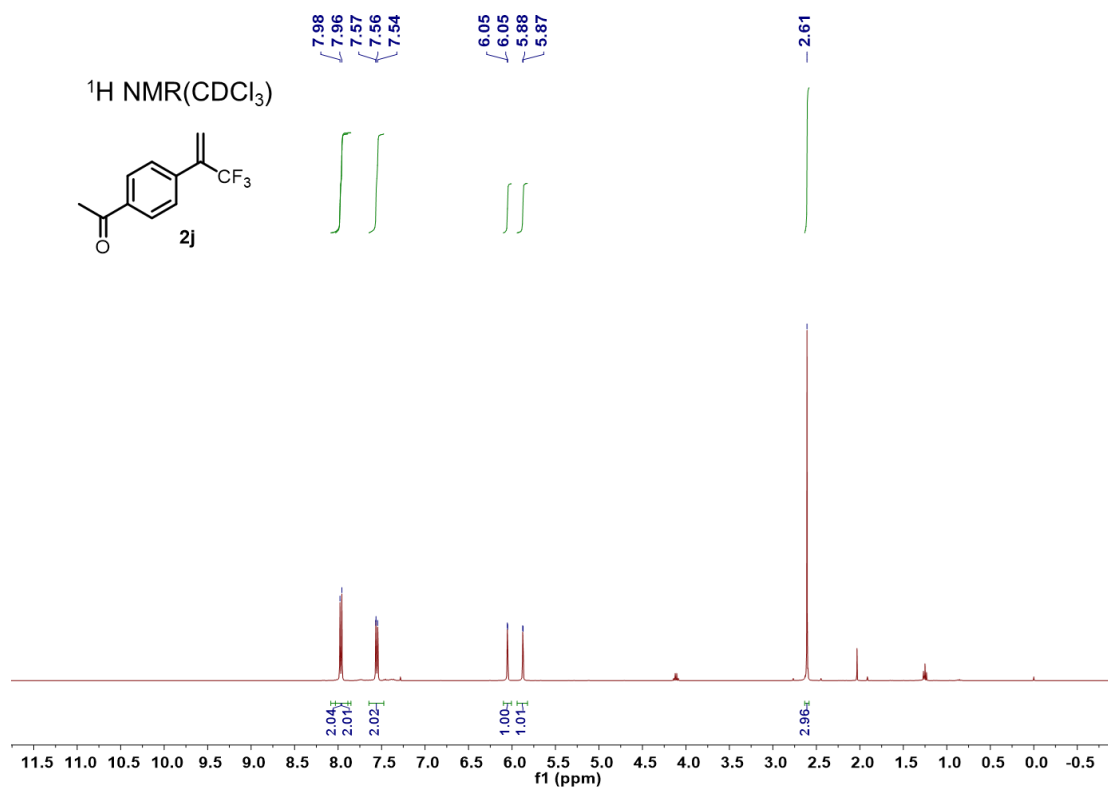

Supplementary Figure 30. <sup>1</sup>H NMR Spectrum of 2j.

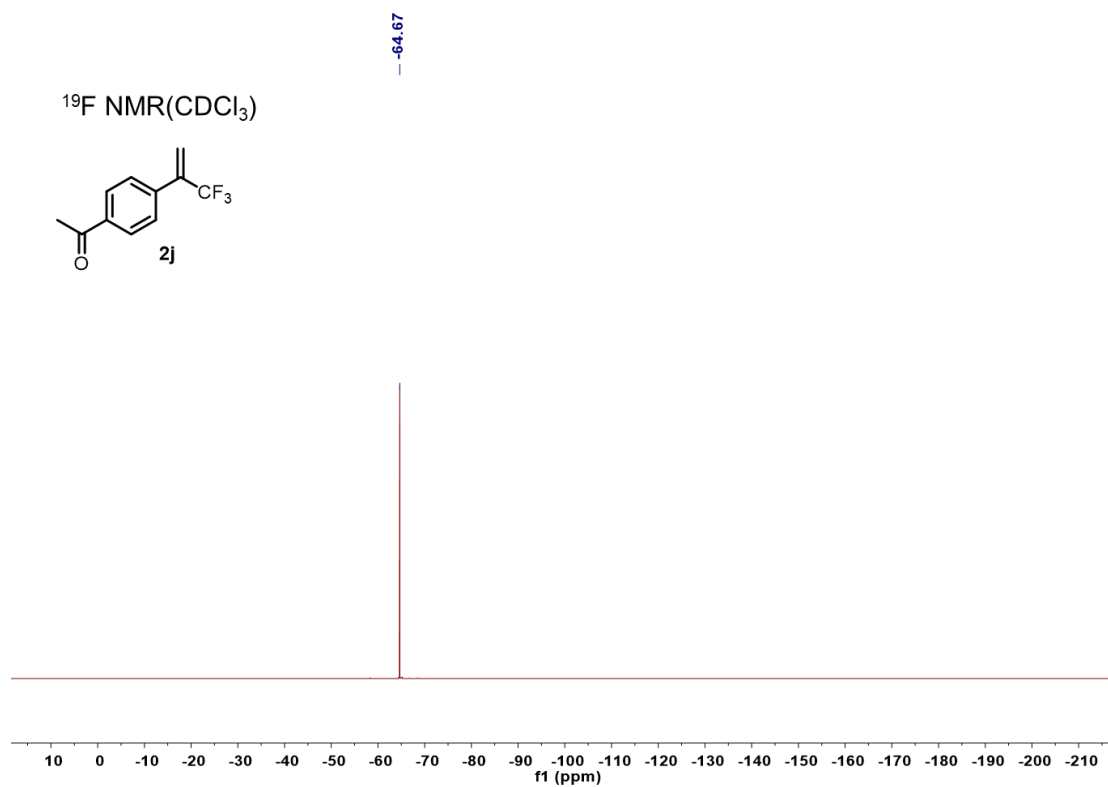

Supplementary Figure 31. <sup>19</sup>F NMR Spectrum of 2j.

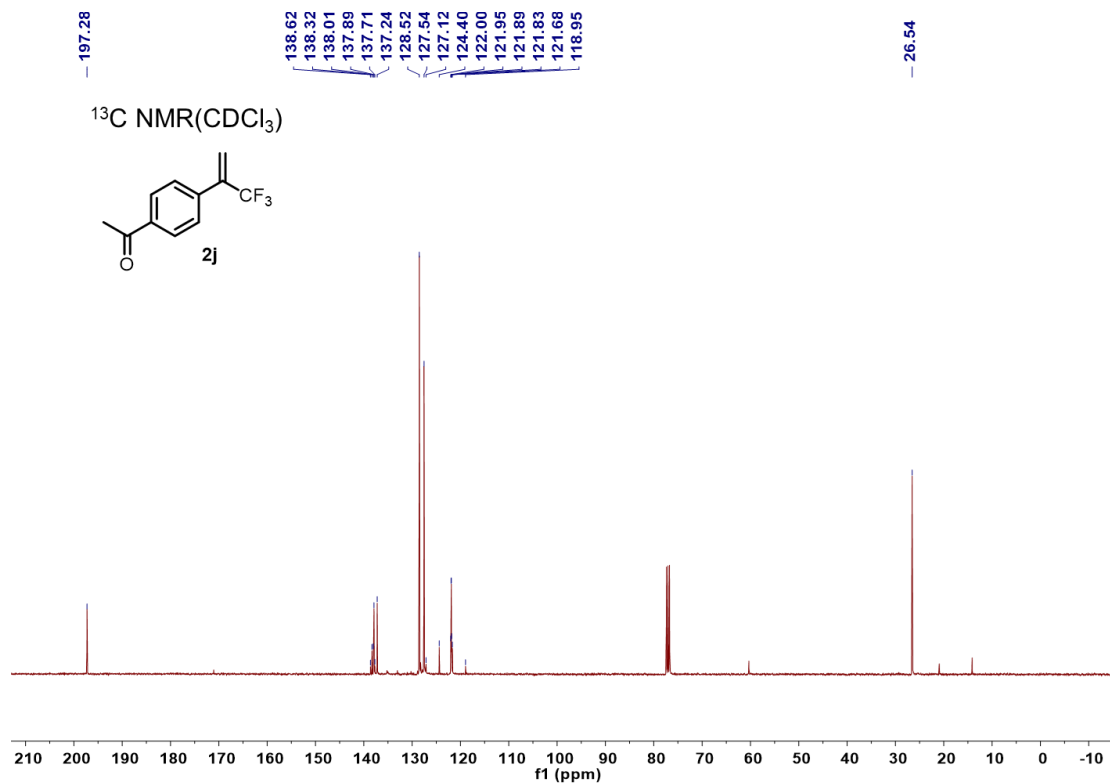

Supplementary Figure 32. <sup>13</sup>C NMR Spectrum of 2j.

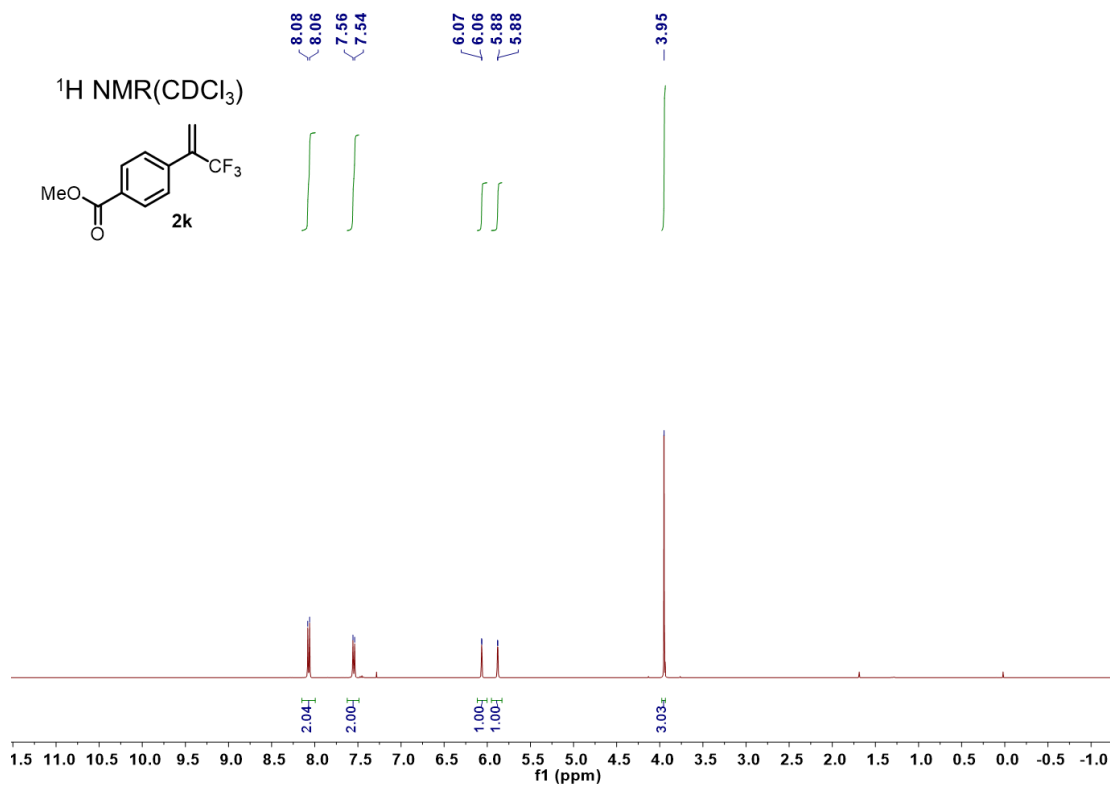

Supplementary Figure 33. <sup>1</sup>H NMR Spectrum of 2k.

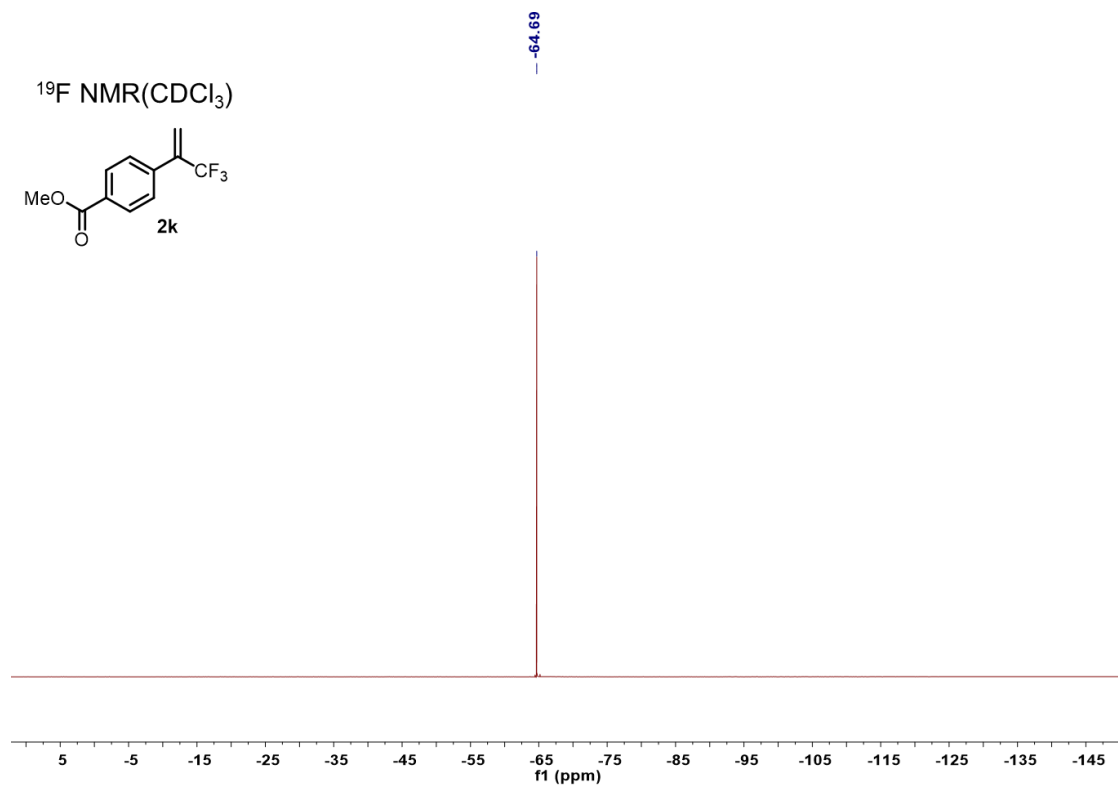

Supplementary Figure 34. <sup>19</sup>F NMR Spectrum of **2k**.

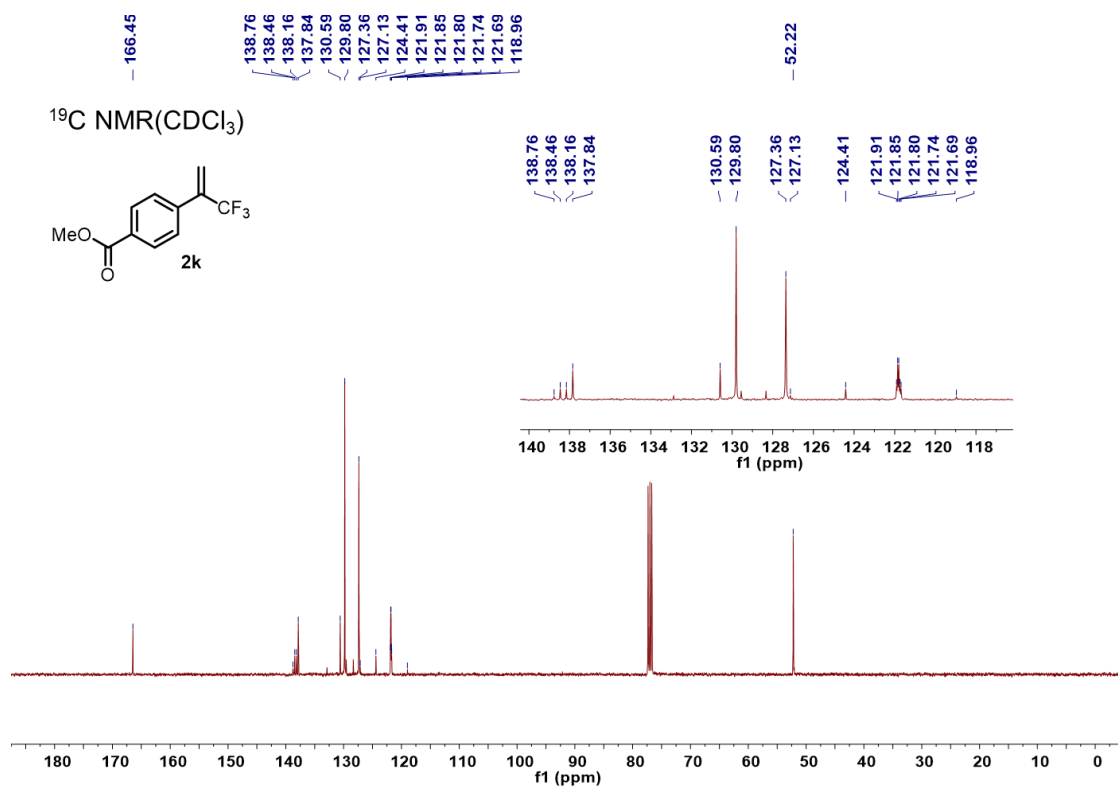

Supplementary Figure 35. <sup>13</sup>C NMR Spectrum of **2k**.

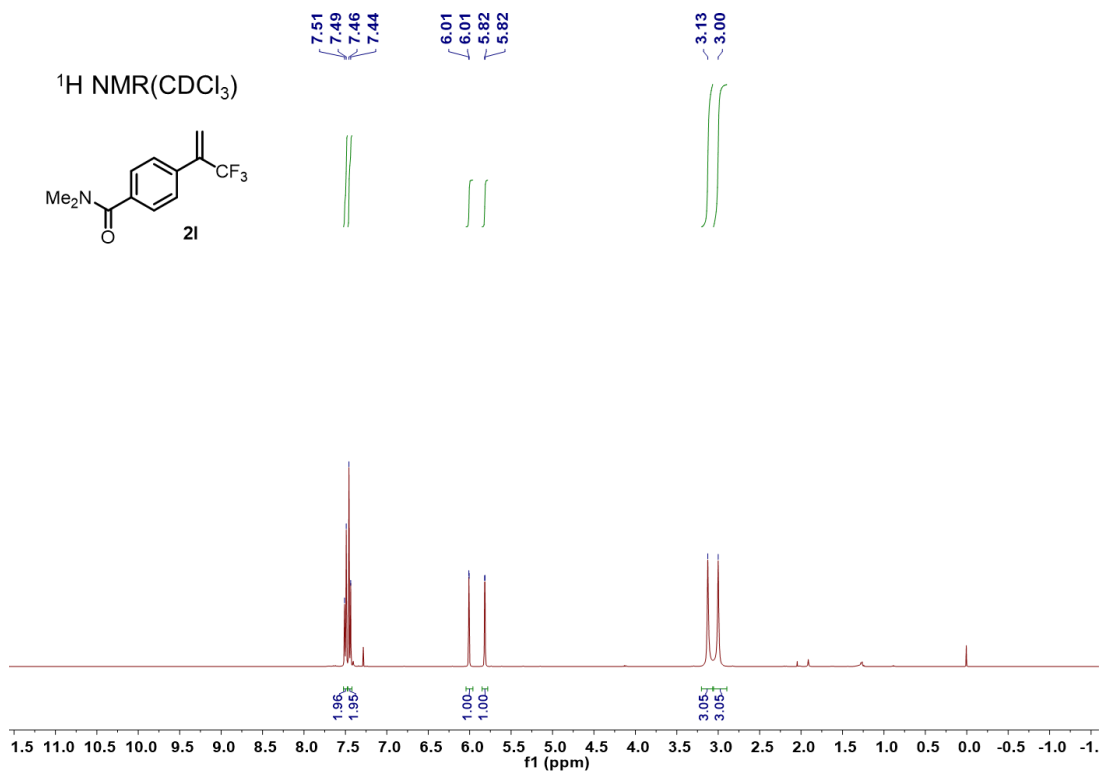

Supplementary Figure 36. <sup>1</sup>H NMR Spectrum of 21.

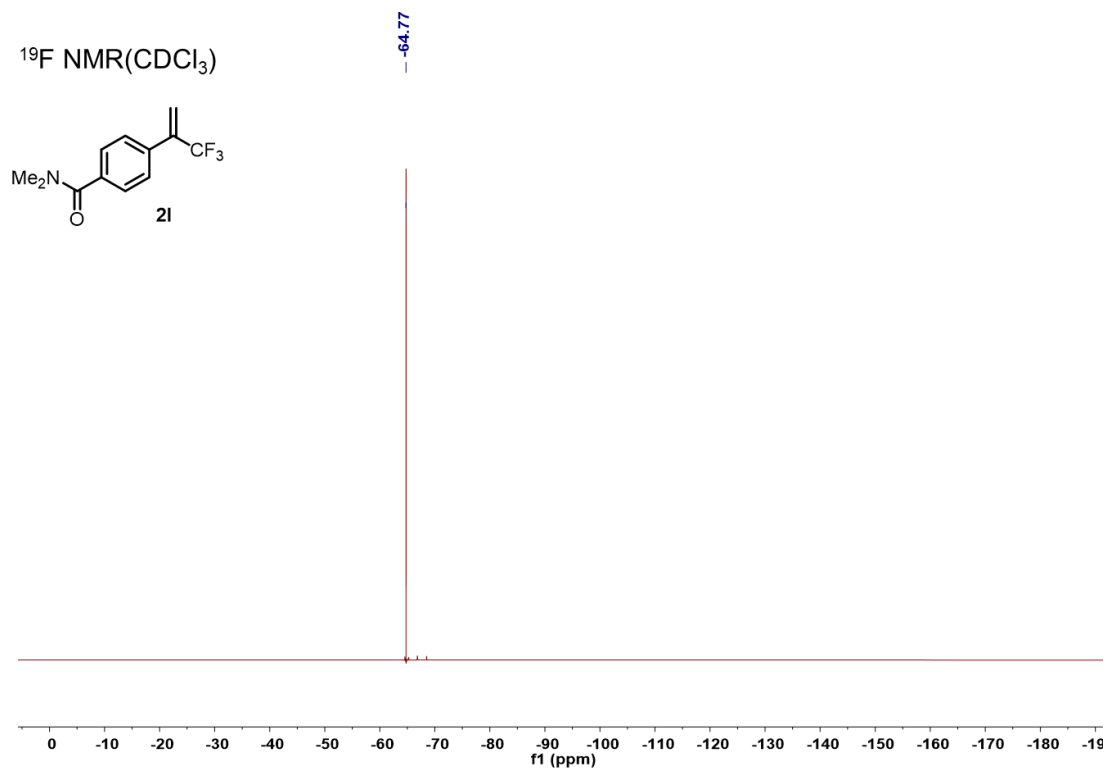

Supplementary Figure 37. <sup>19</sup>F NMR Spectrum of 21.

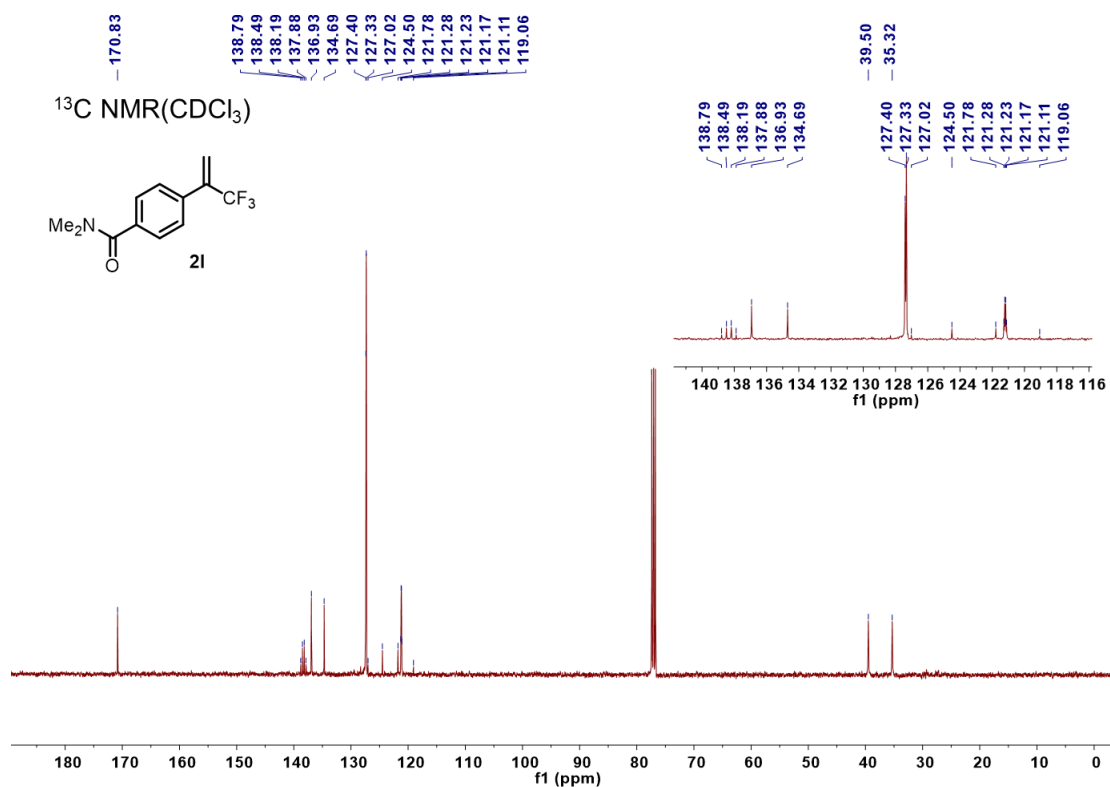

Supplementary Figure 38. <sup>13</sup>C NMR Spectrum of **2l**.

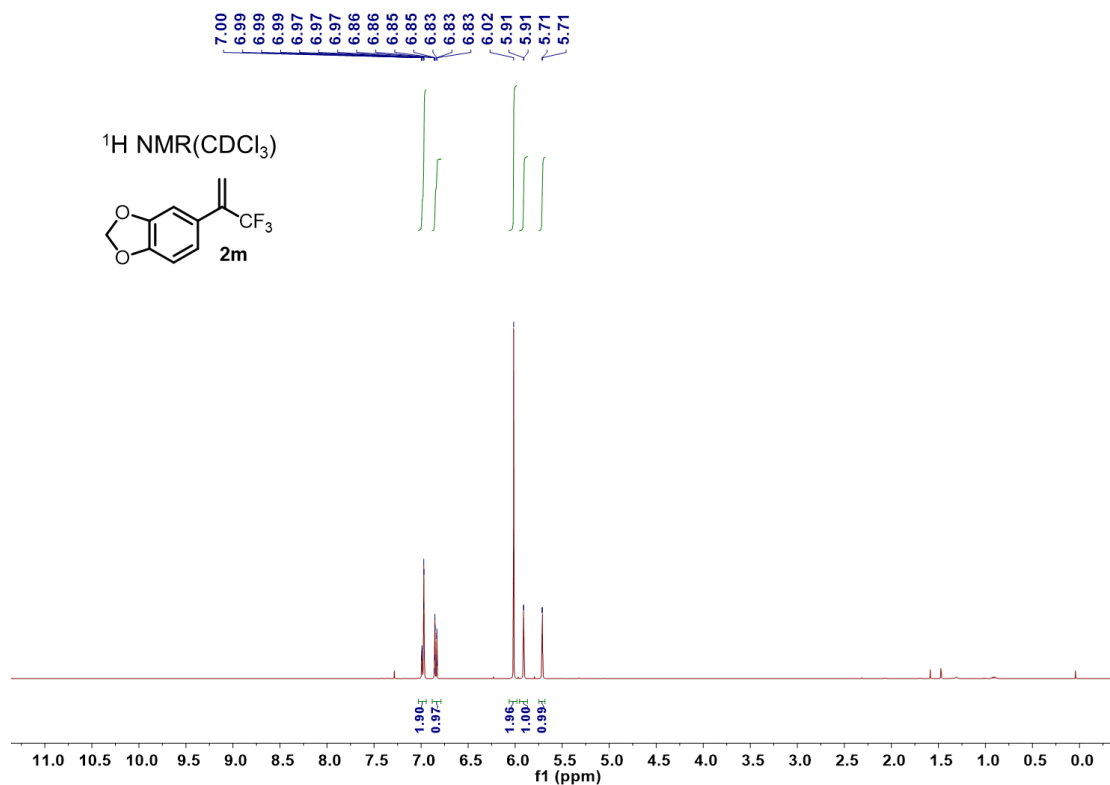

Supplementary Figure 39. <sup>1</sup>H NMR Spectrum of **2m**.

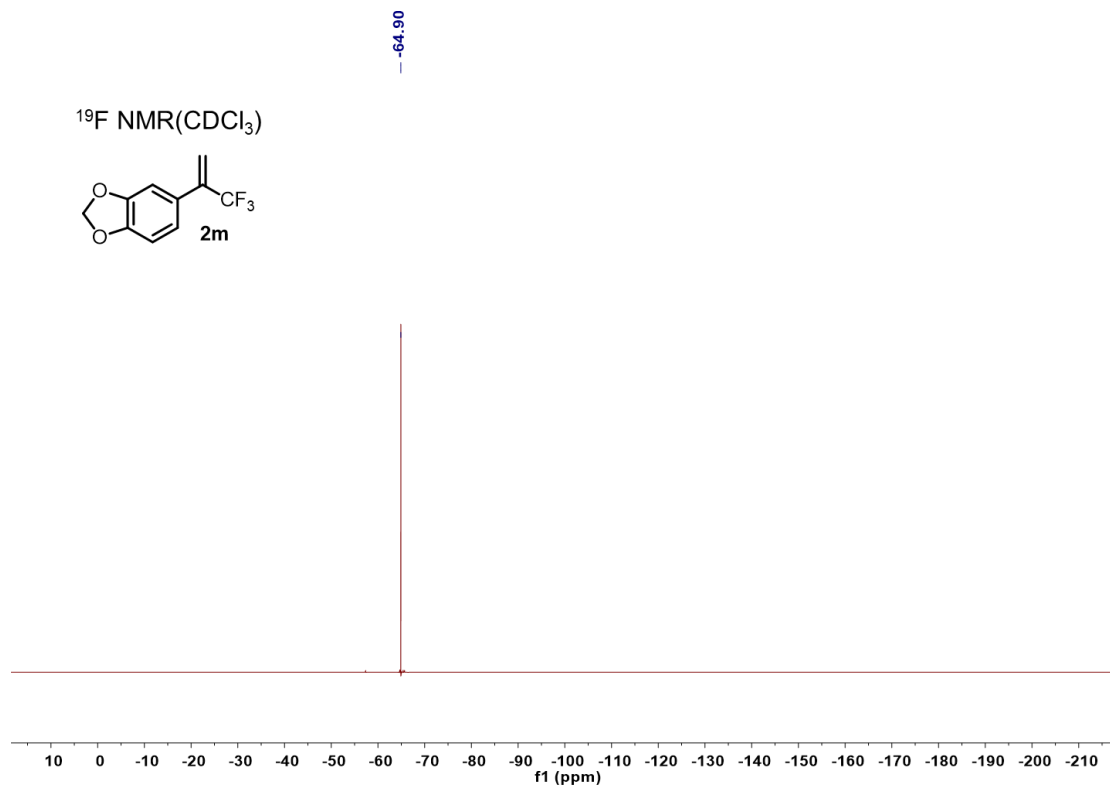

Supplementary Figure 40. <sup>19</sup>F NMR Spectrum of **2m**.

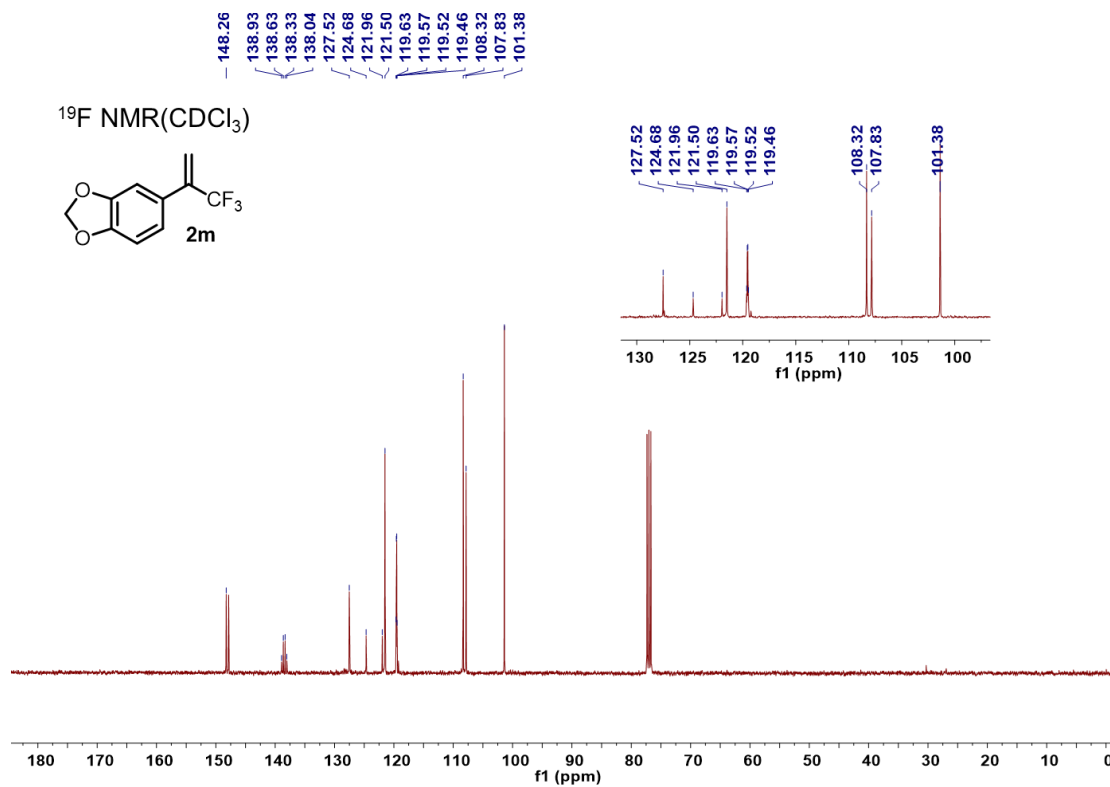

Supplementary Figure 41. <sup>13</sup>C NMR Spectrum of **2m**.

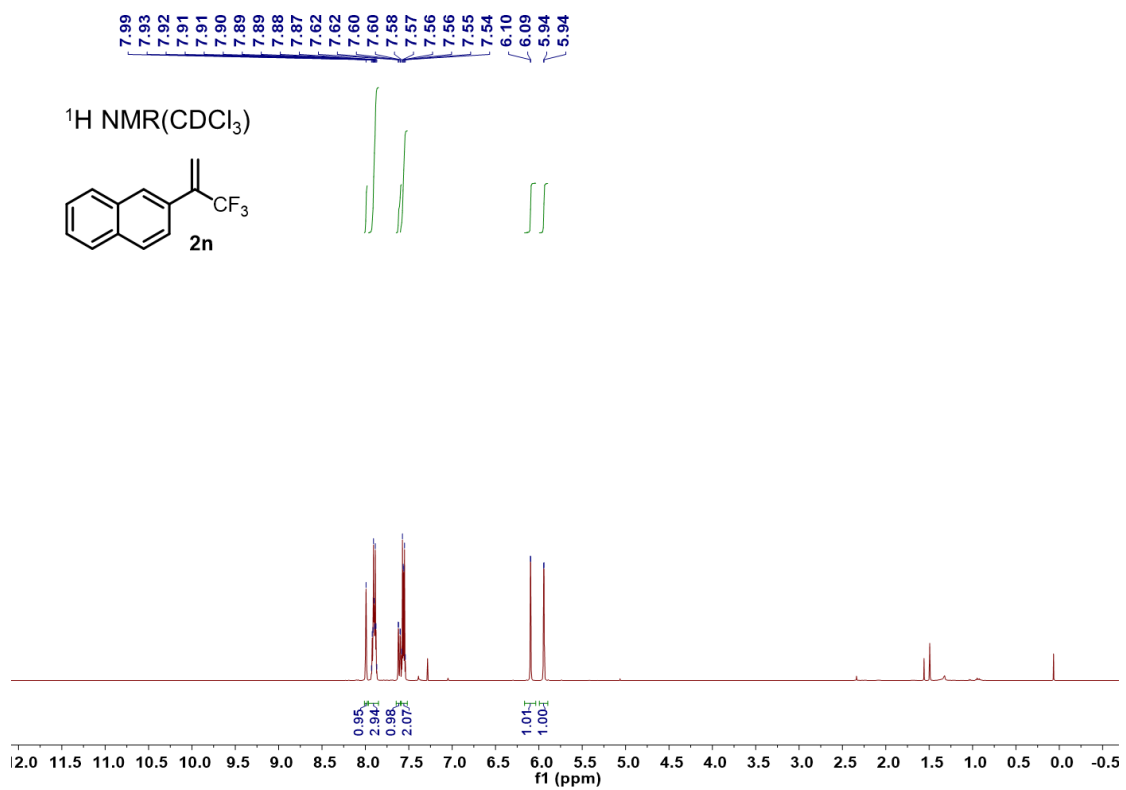

Supplementary Figure 42. <sup>1</sup>H NMR Spectrum of 2n.

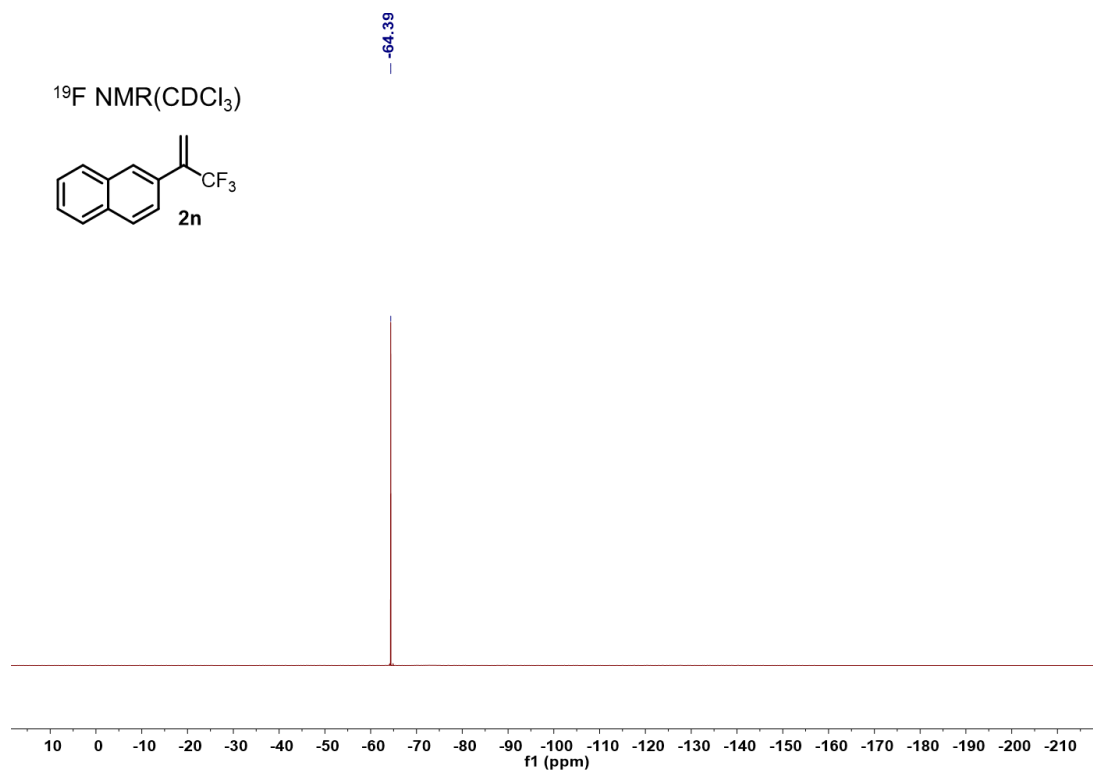

Supplementary Figure 43. <sup>19</sup>F NMR Spectrum of 2n.



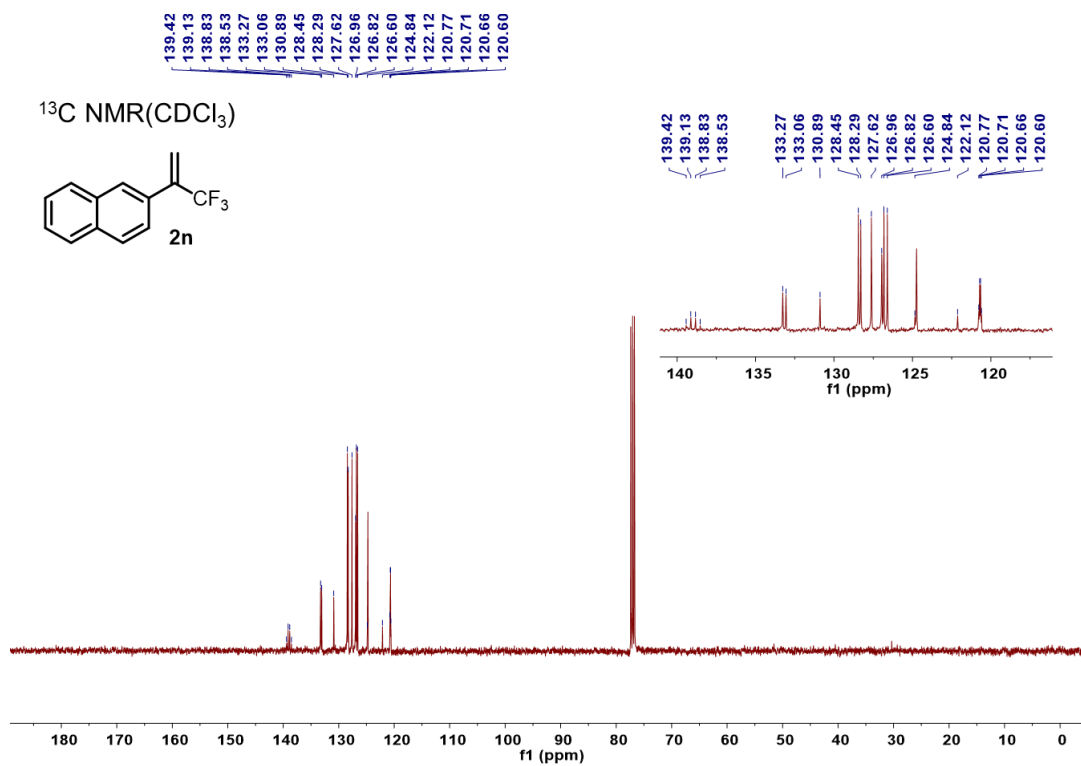

Supplementary Figure 44. <sup>13</sup>C NMR Spectrum of 2n.

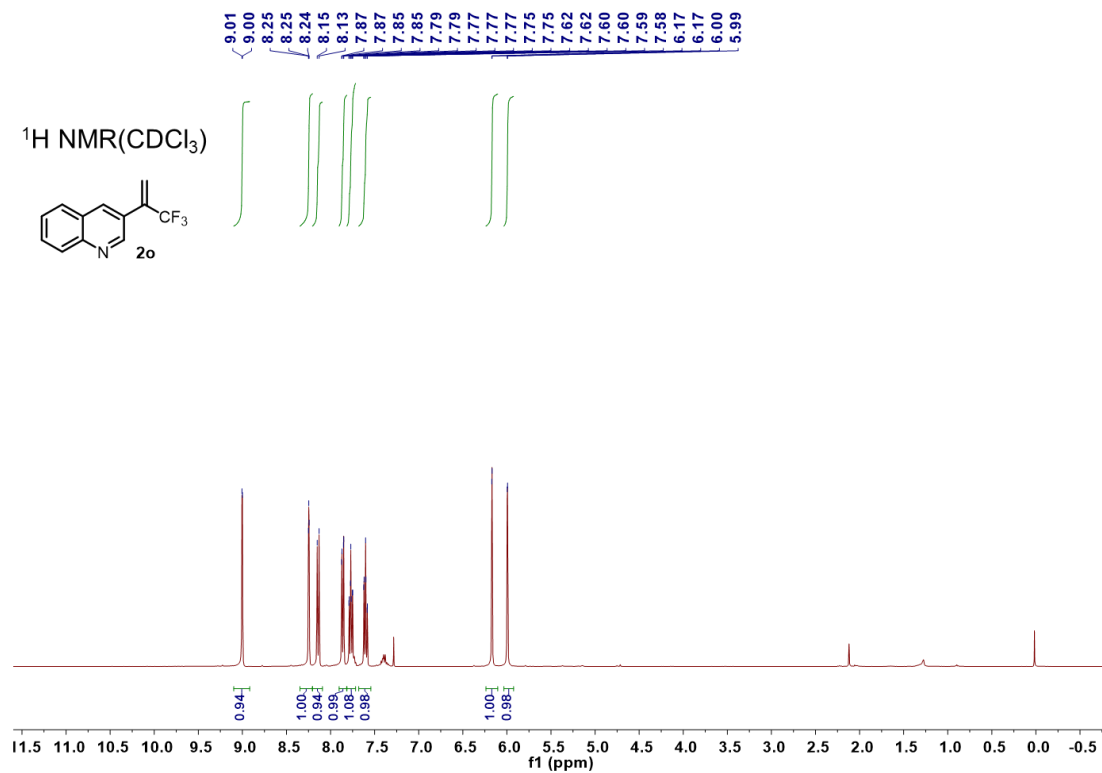

Supplementary Figure 45. <sup>1</sup>H NMR Spectrum of 2o.

$^{19}\text{F}$  NMR( $\text{CDCl}_3$ )

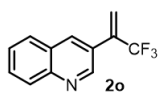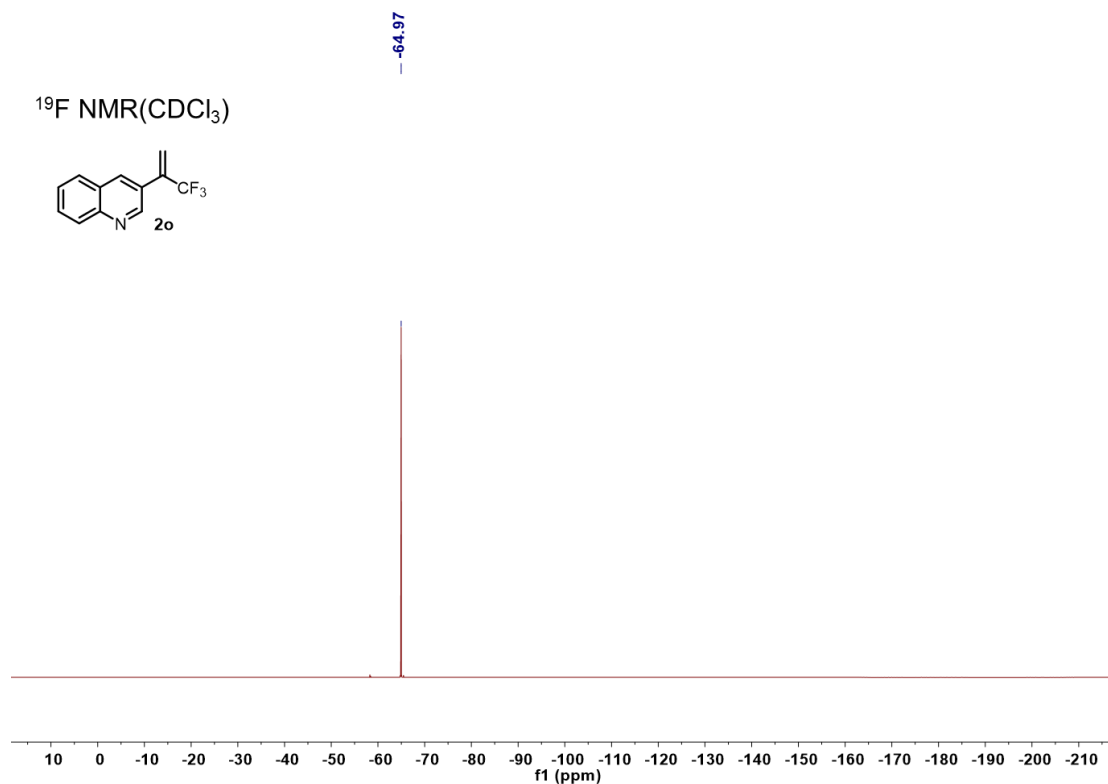

Supplementary Figure 46.  $^{19}\text{F}$  NMR Spectrum of 2o.

$^{13}\text{C}$  NMR( $\text{CDCl}_3$ )

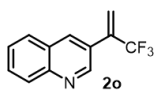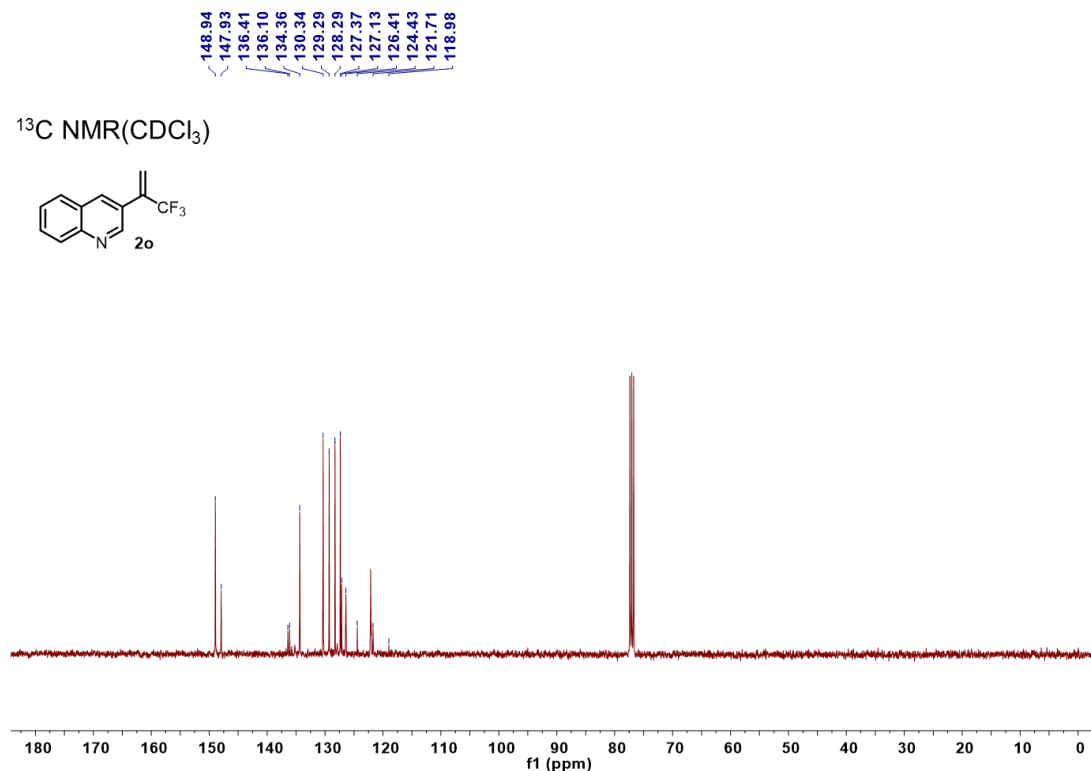

Supplementary Figure 47.  $^{13}\text{C}$  NMR Spectrum of 2o.

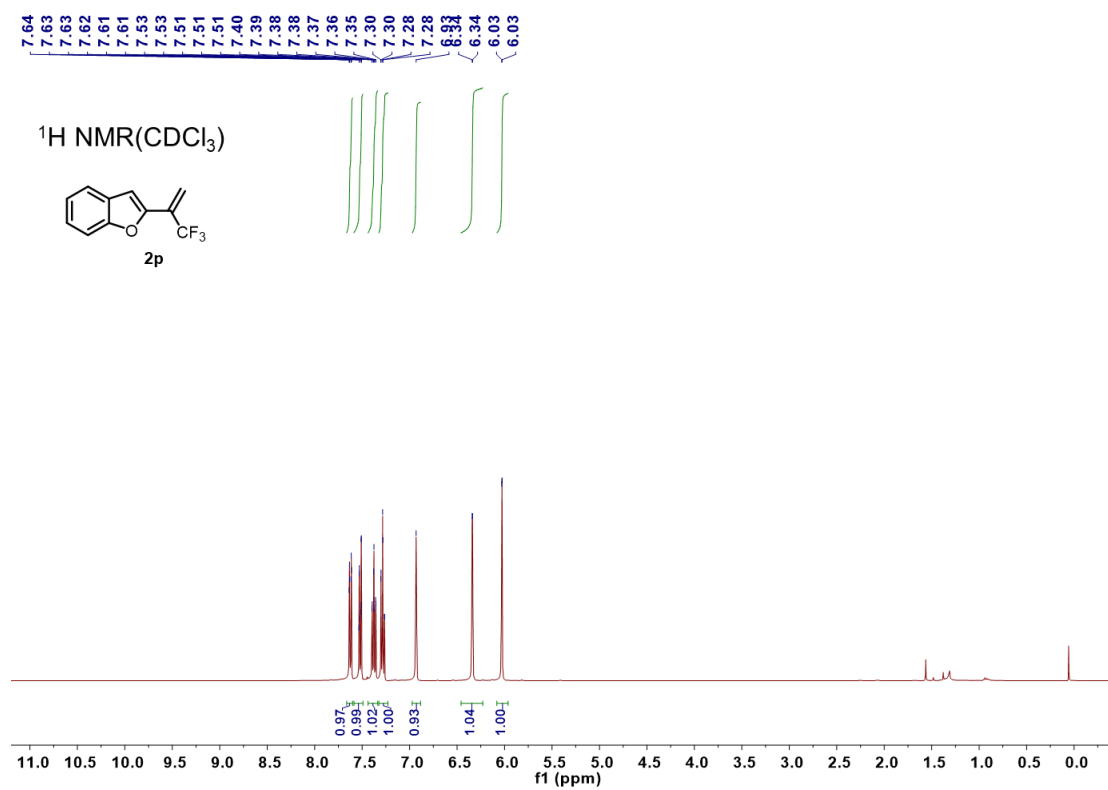

Supplementary Figure 48. <sup>1</sup>H NMR Spectrum of 2p.

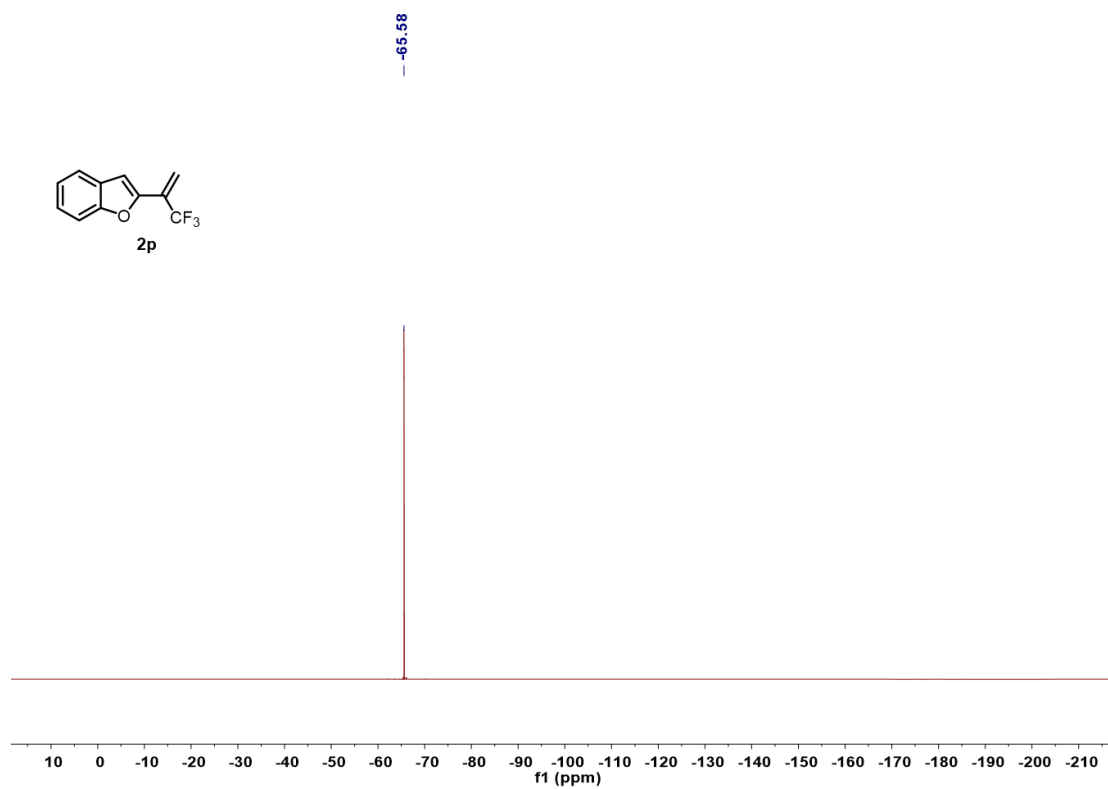

Supplementary Figure 49. <sup>19</sup>F NMR Spectrum of 2p.

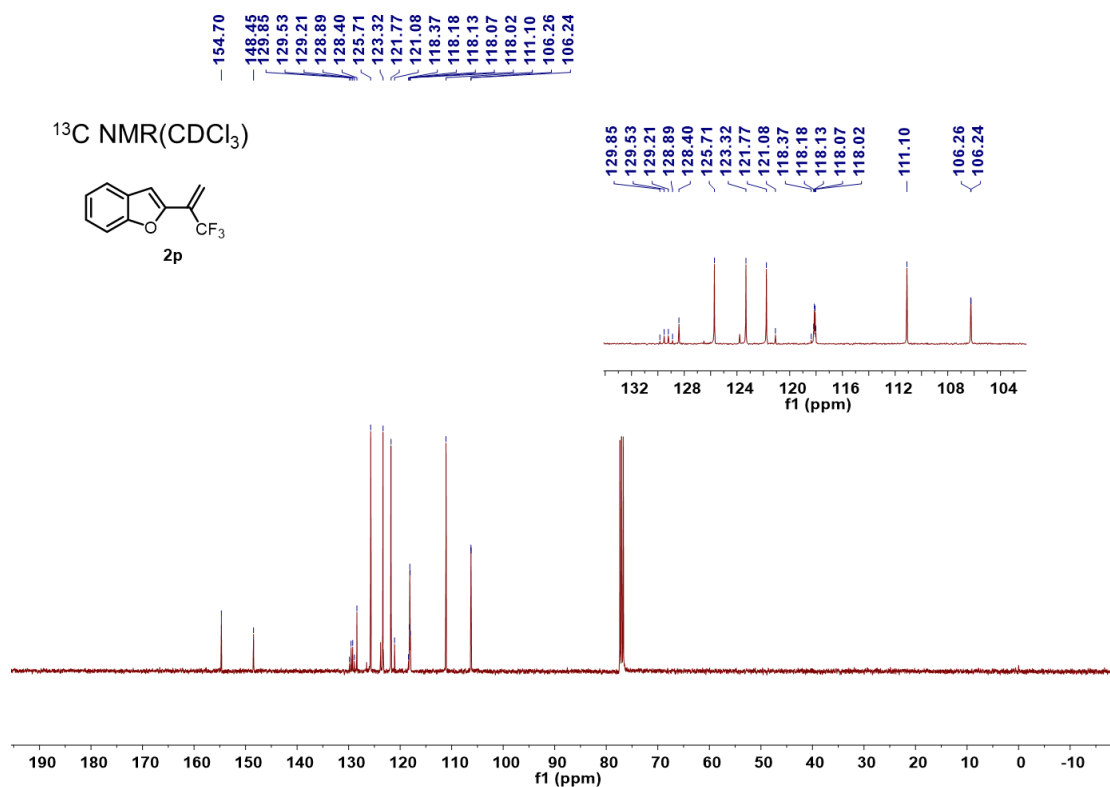

Supplementary Figure 50. <sup>13</sup>C NMR Spectrum of 2p.

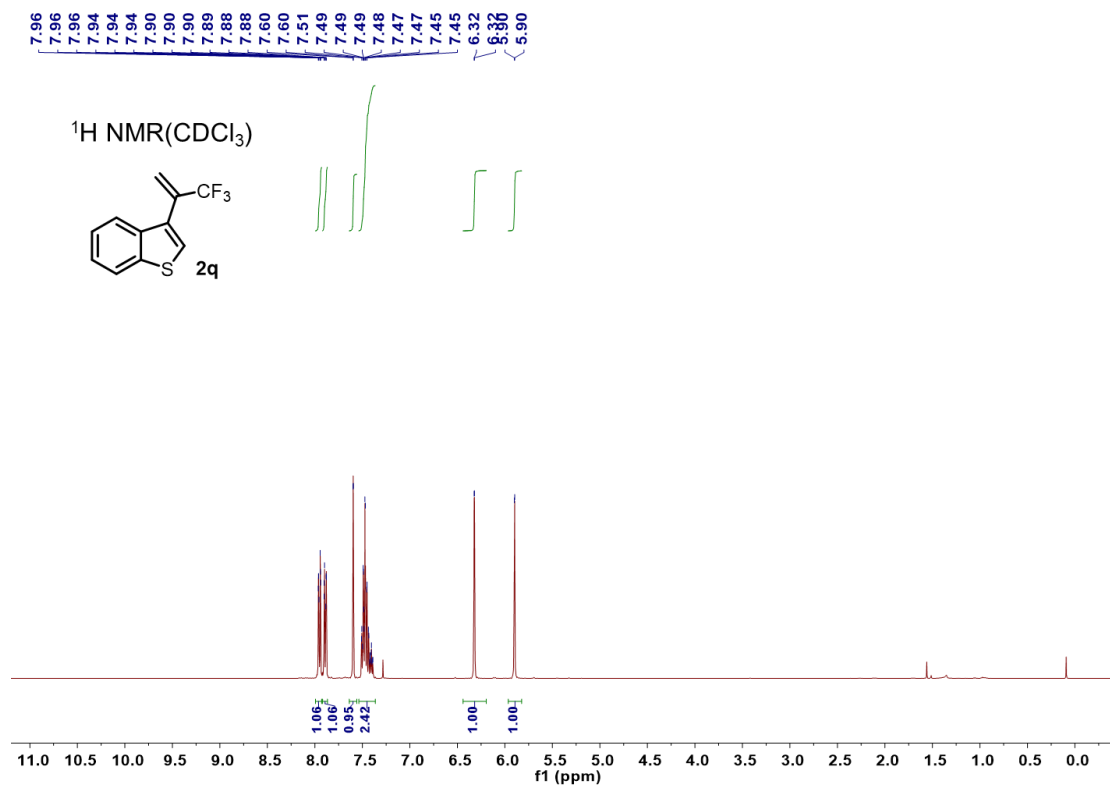

Supplementary Figure 51. <sup>1</sup>H NMR Spectrum of 2q.

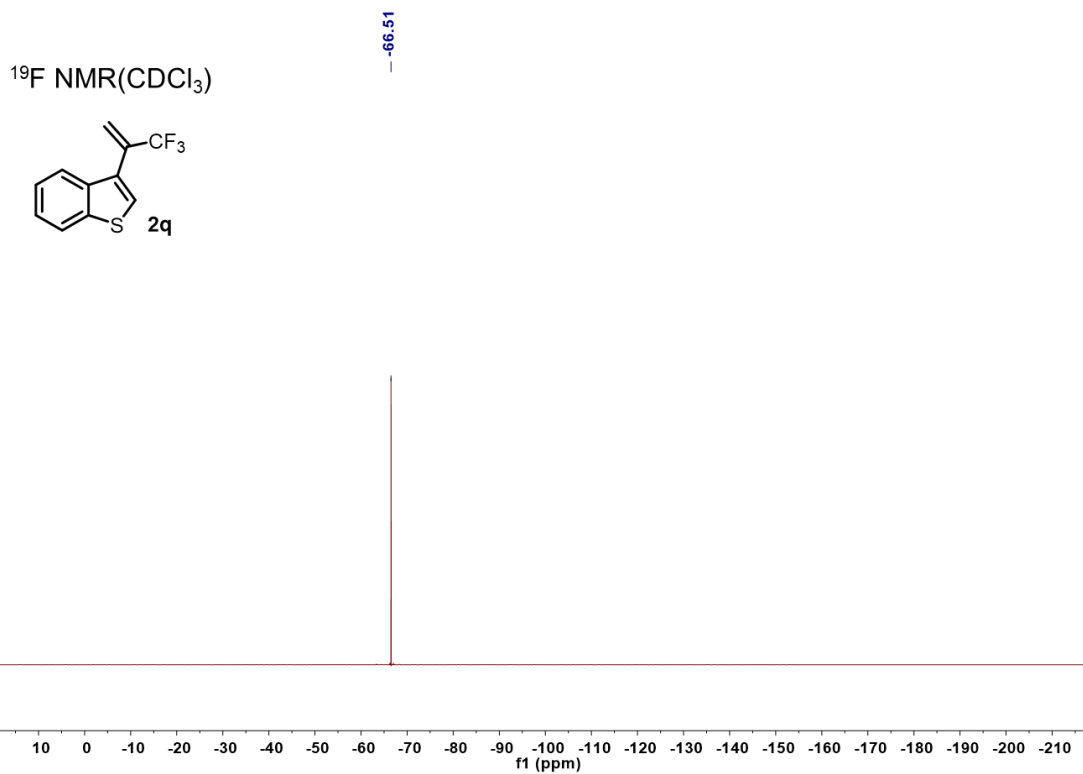

Supplementary Figure 52. <sup>19</sup>F NMR Spectrum of **2q**.

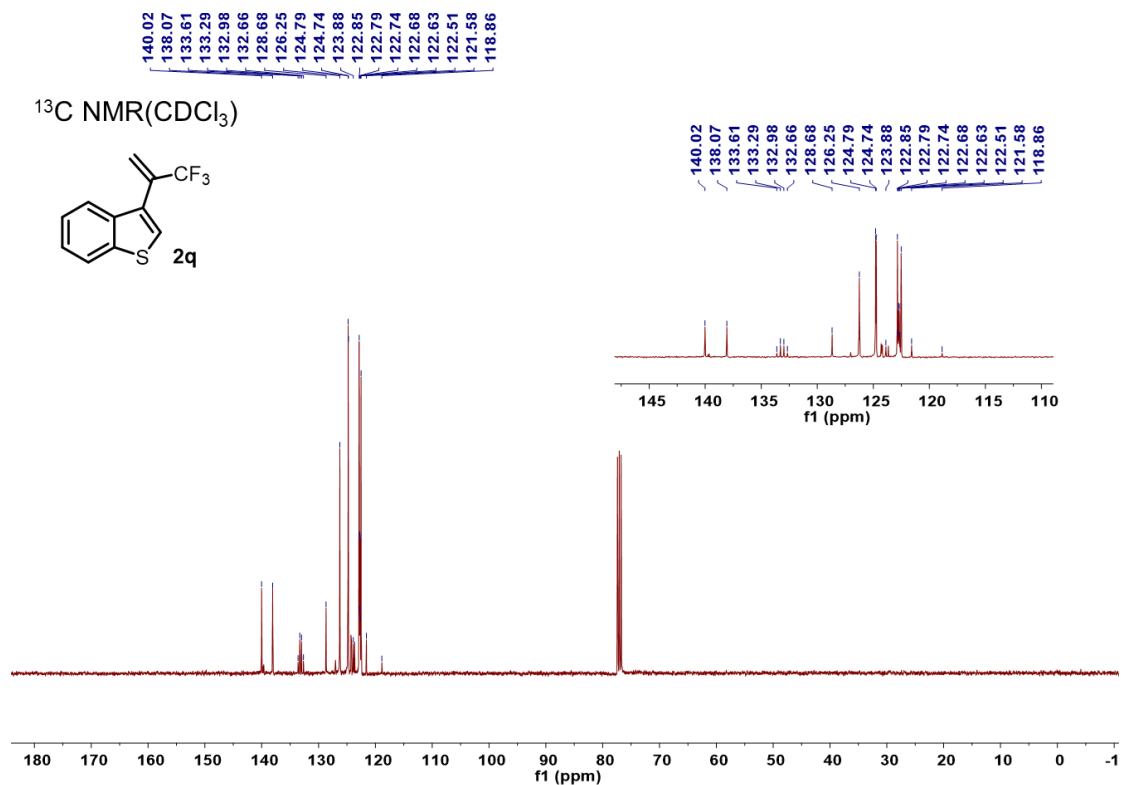

Supplementary Figure 53. <sup>13</sup>C NMR Spectrum of **2q**.

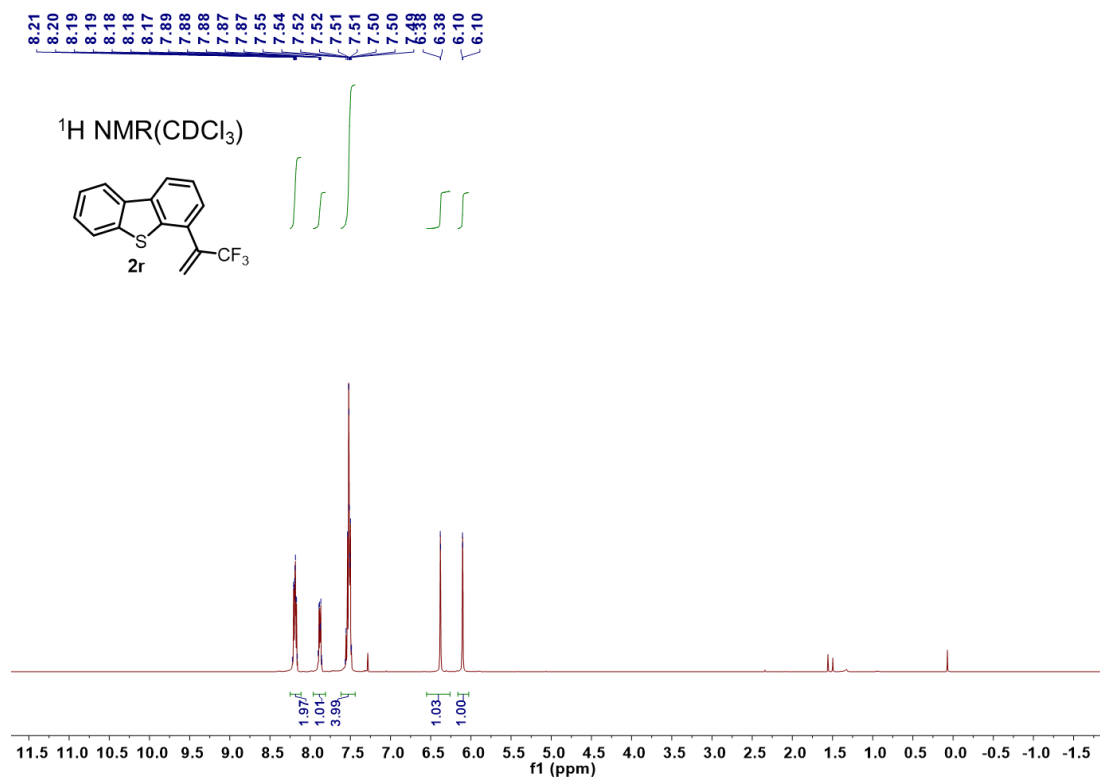

Supplementary Figure 54. <sup>1</sup>H NMR Spectrum of 2r.

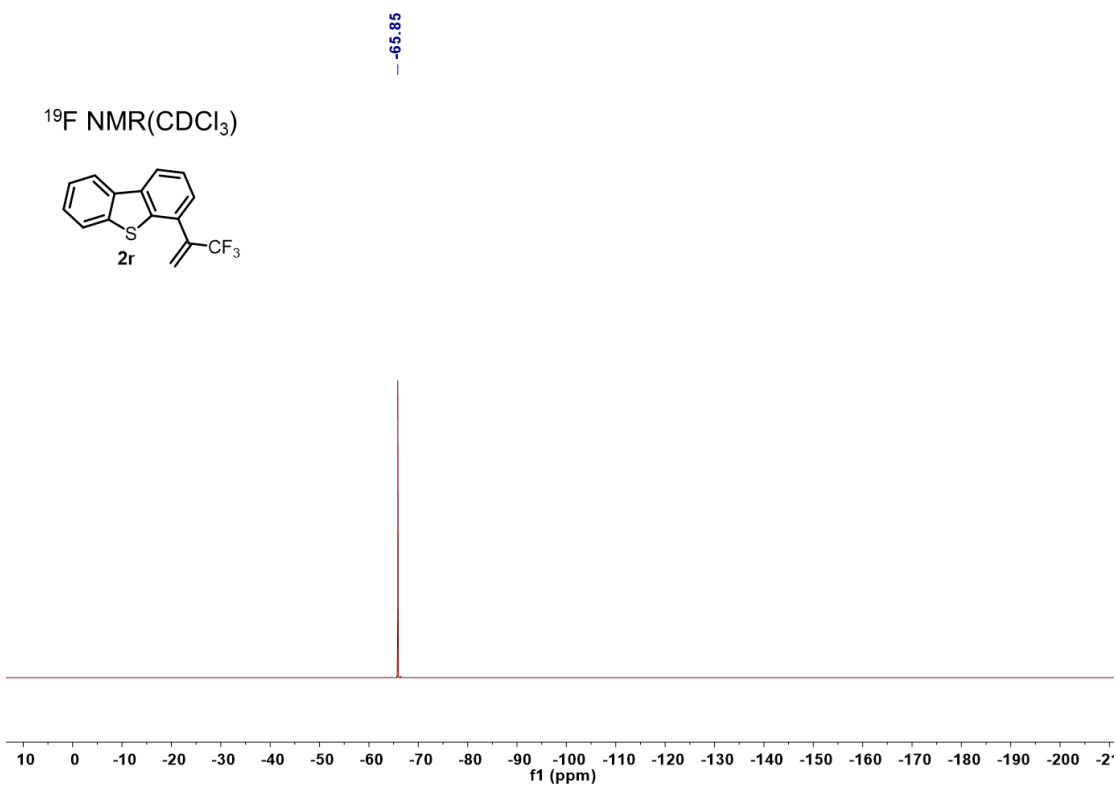

Supplementary Figure 55. <sup>19</sup>F NMR Spectrum of 2r.

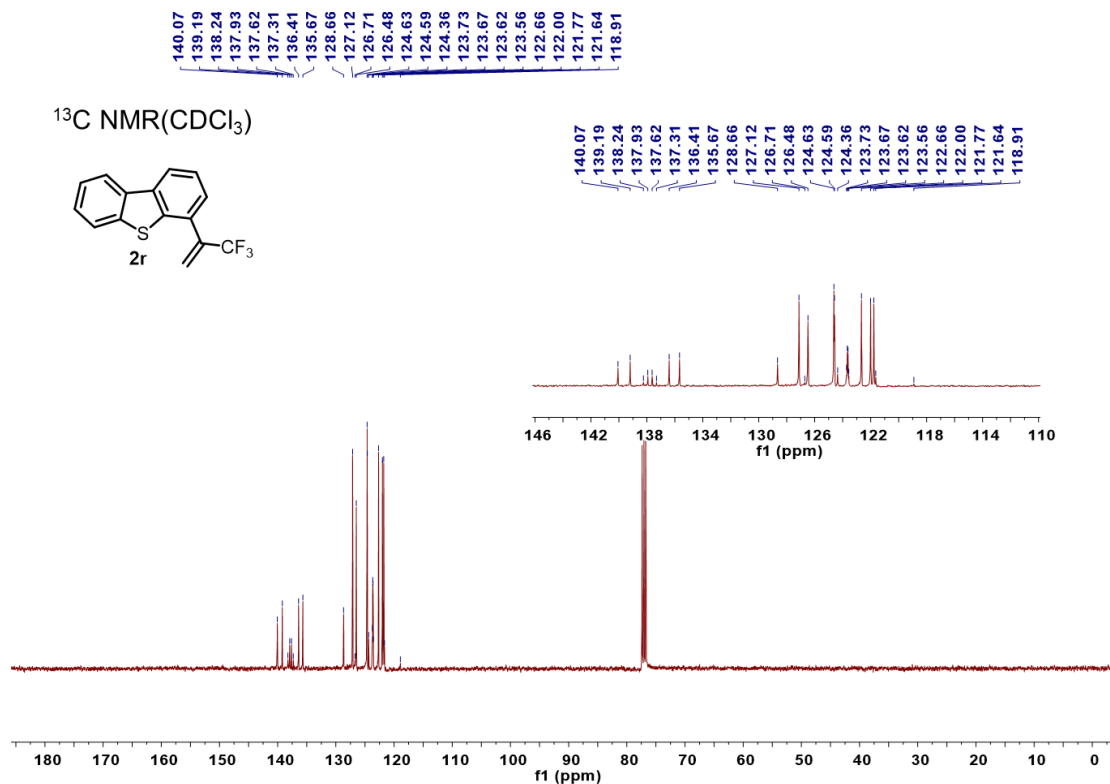

Supplementary Figure 56. <sup>13</sup>C NMR Spectrum of 2r.

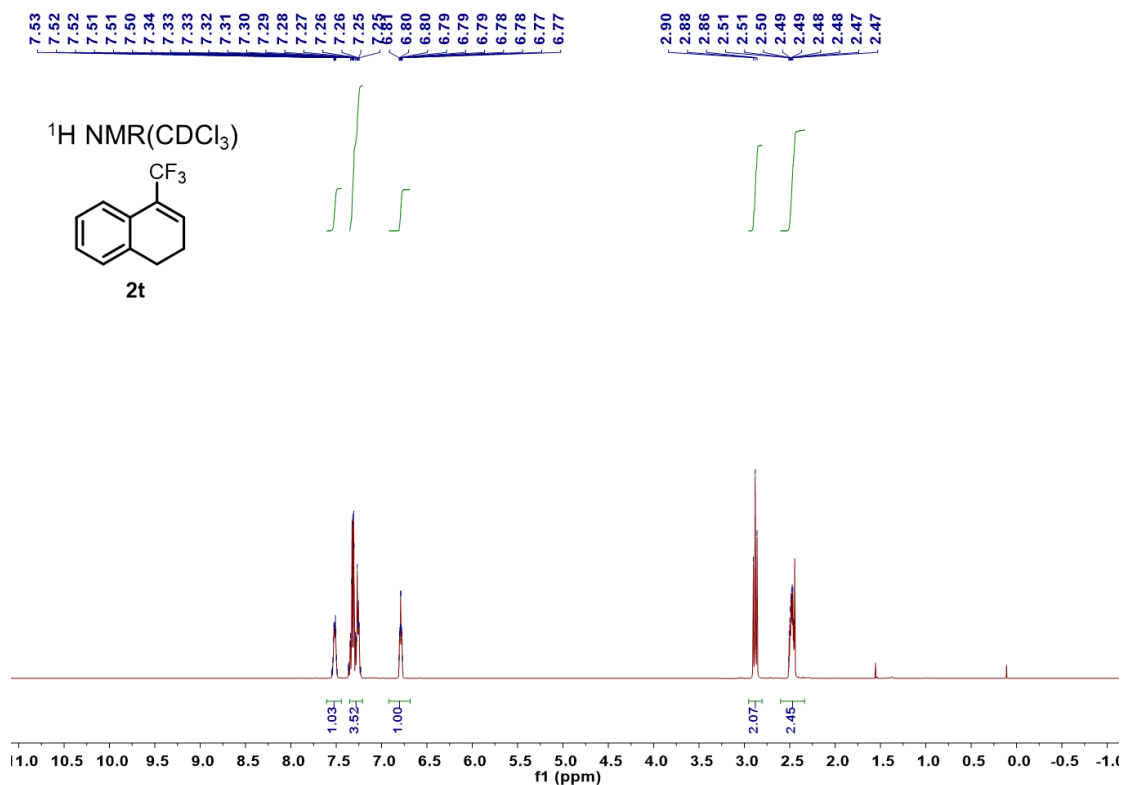

Supplementary Figure 57. <sup>1</sup>H NMR Spectrum of 2t.

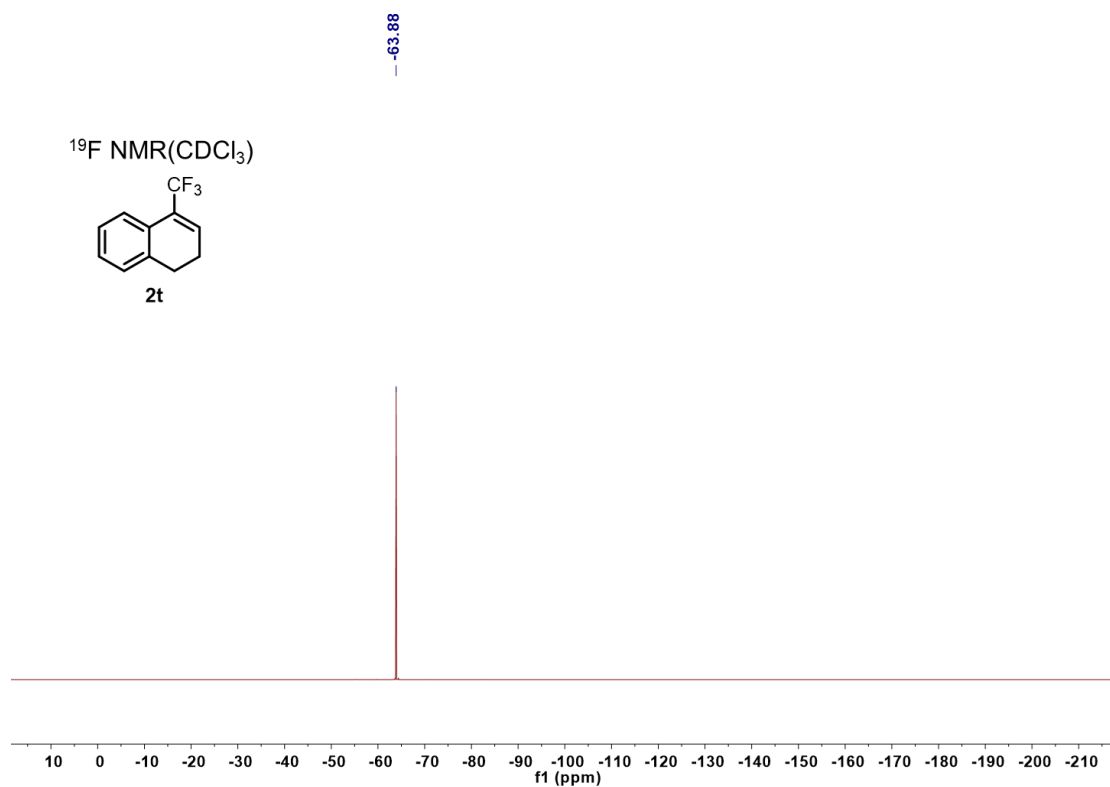

Supplementary Figure 58. <sup>19</sup>F NMR Spectrum of 2t.

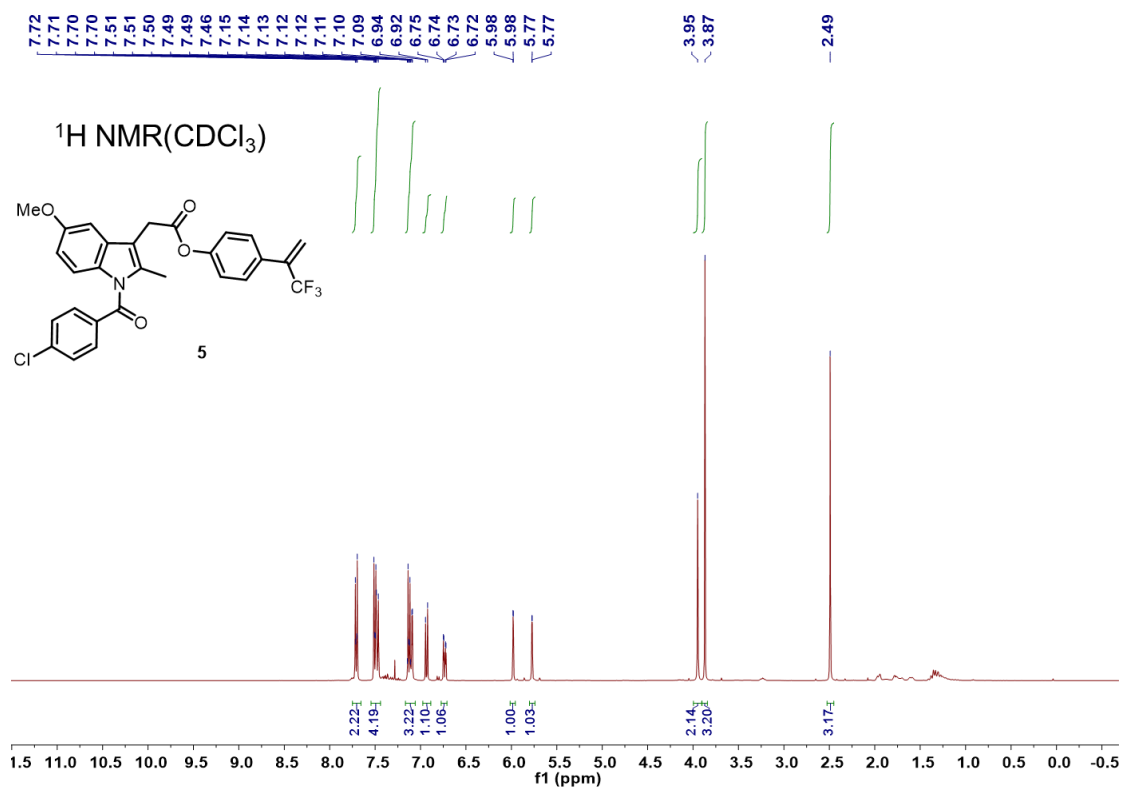

Supplementary Figure 59. <sup>1</sup>H NMR Spectrum of 5.



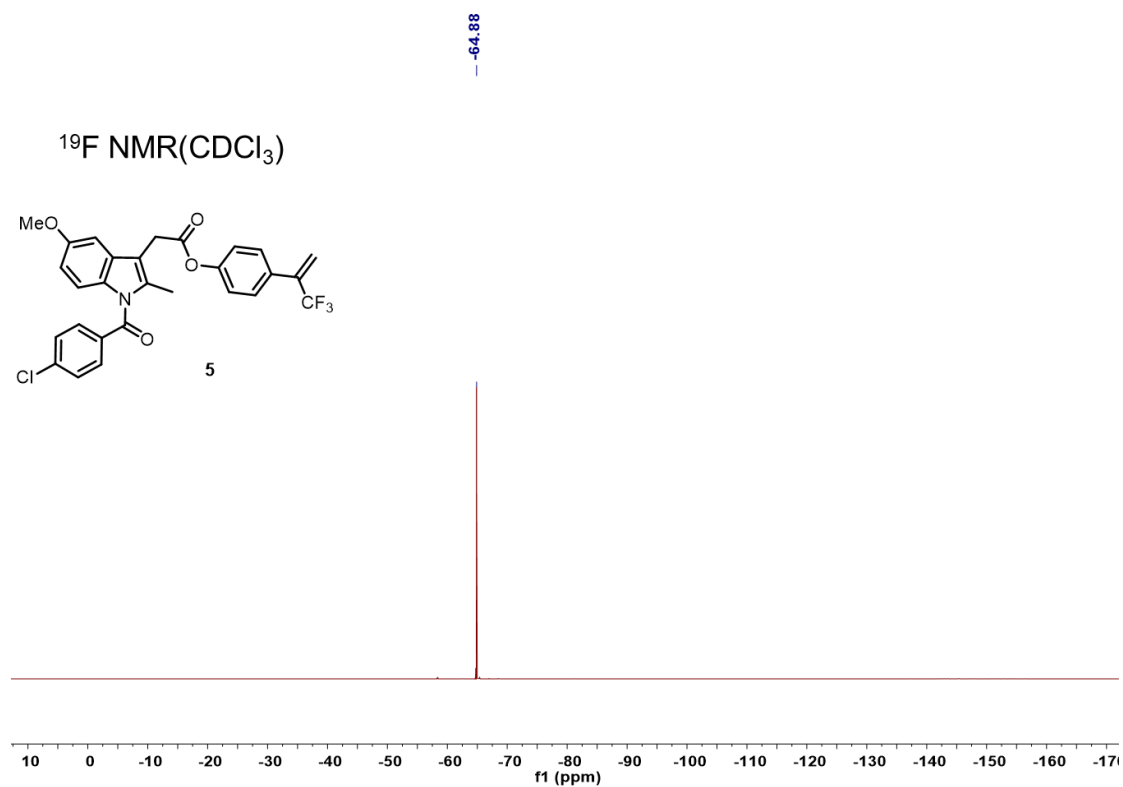

Supplementary Figure 60. <sup>19</sup>F NMR Spectrum of **5**.

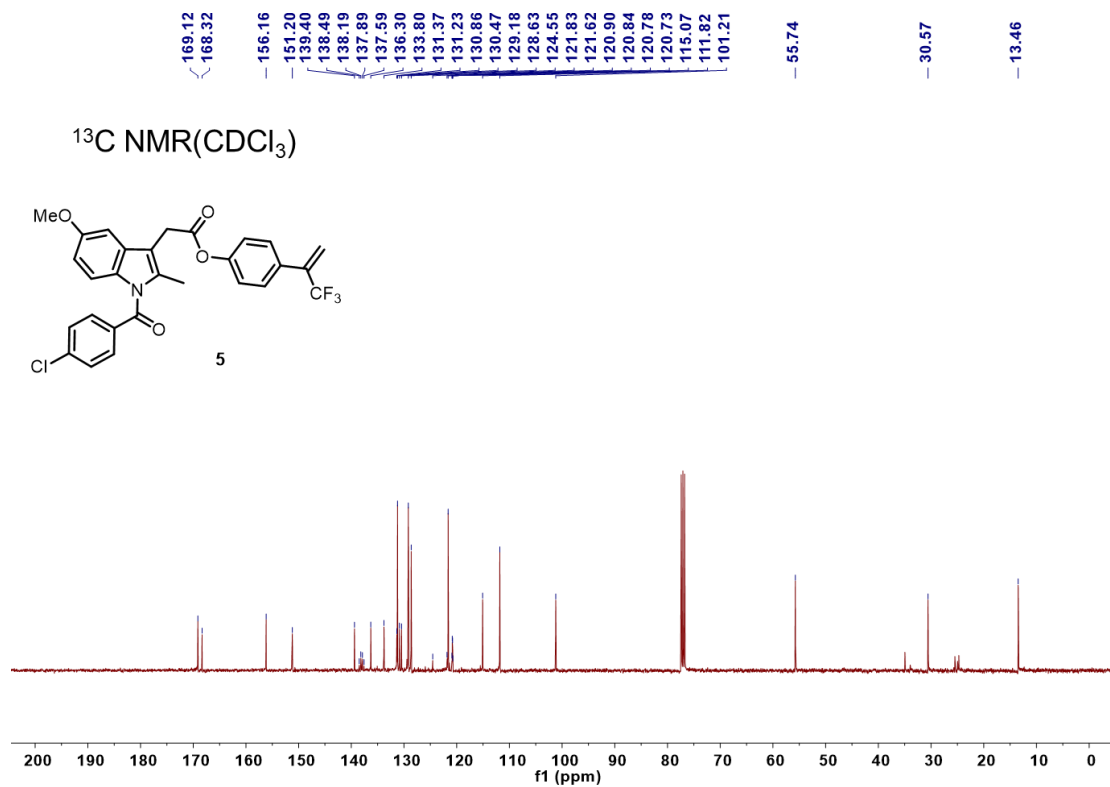

Supplementary Figure 61. <sup>13</sup>C NMR Spectrum of **5**.

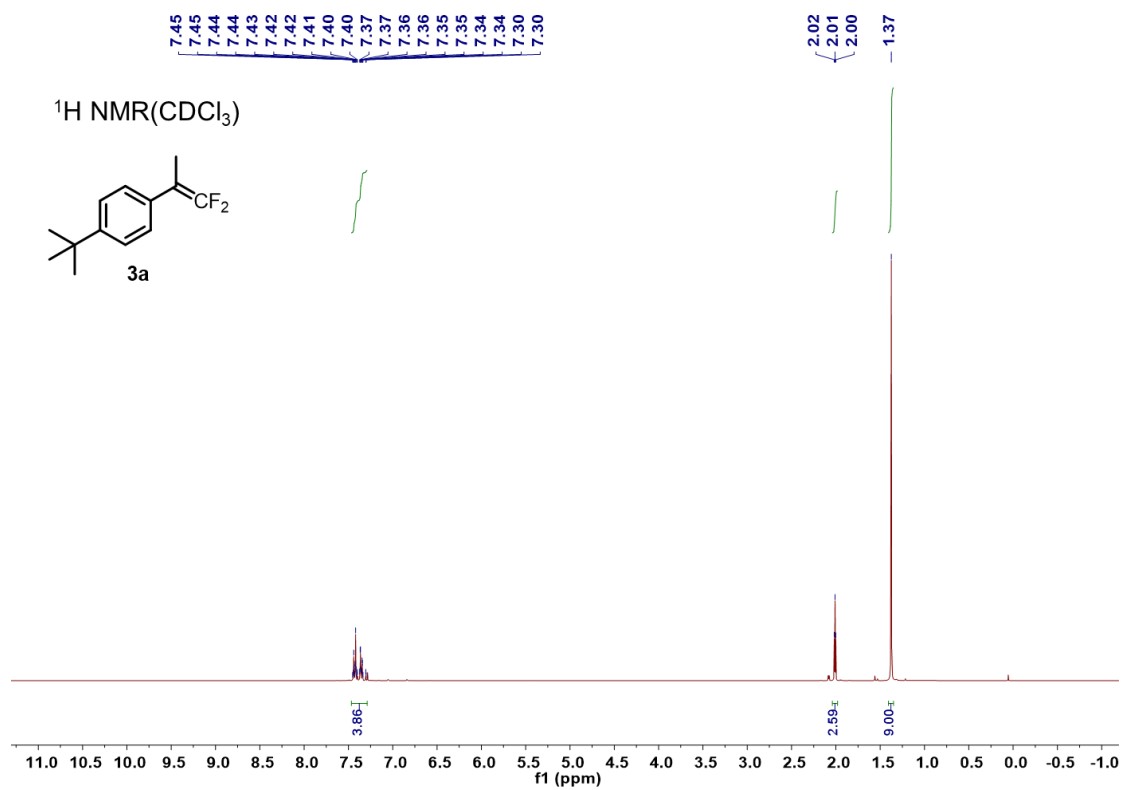

Supplementary Figure 62. <sup>1</sup>H NMR Spectrum of **3a**.

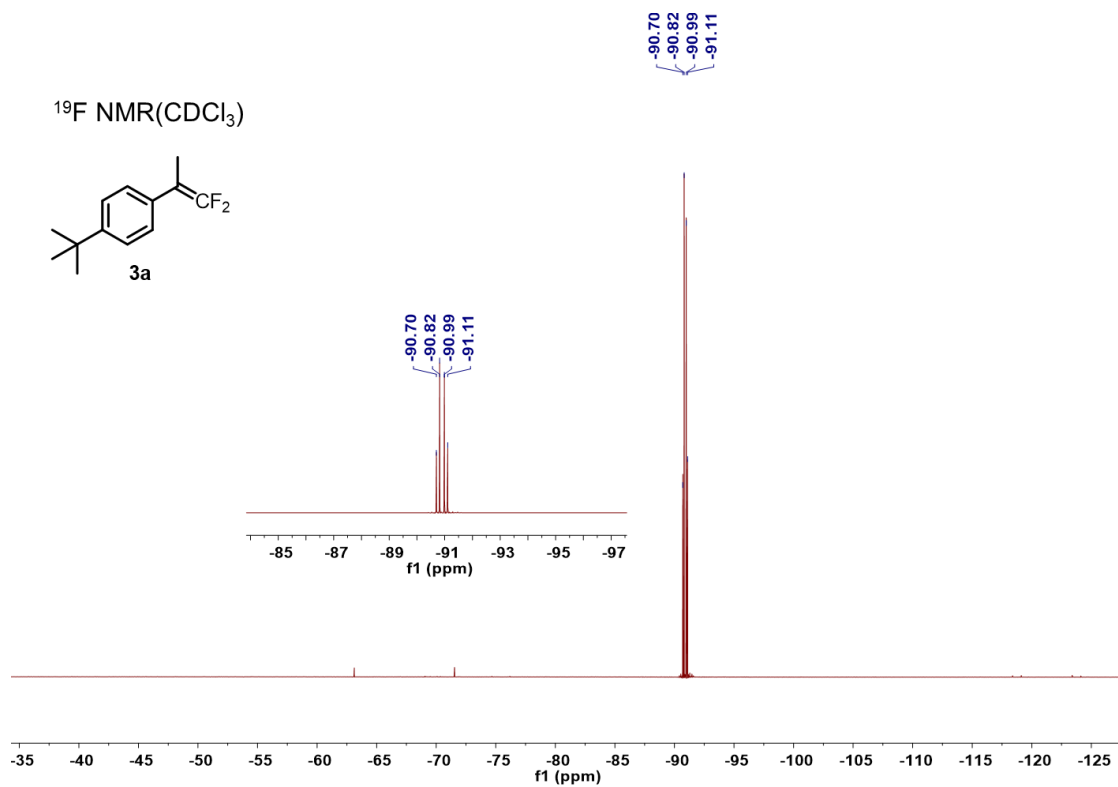

Supplementary Figure 63. <sup>19</sup>F NMR Spectrum of **3a**.

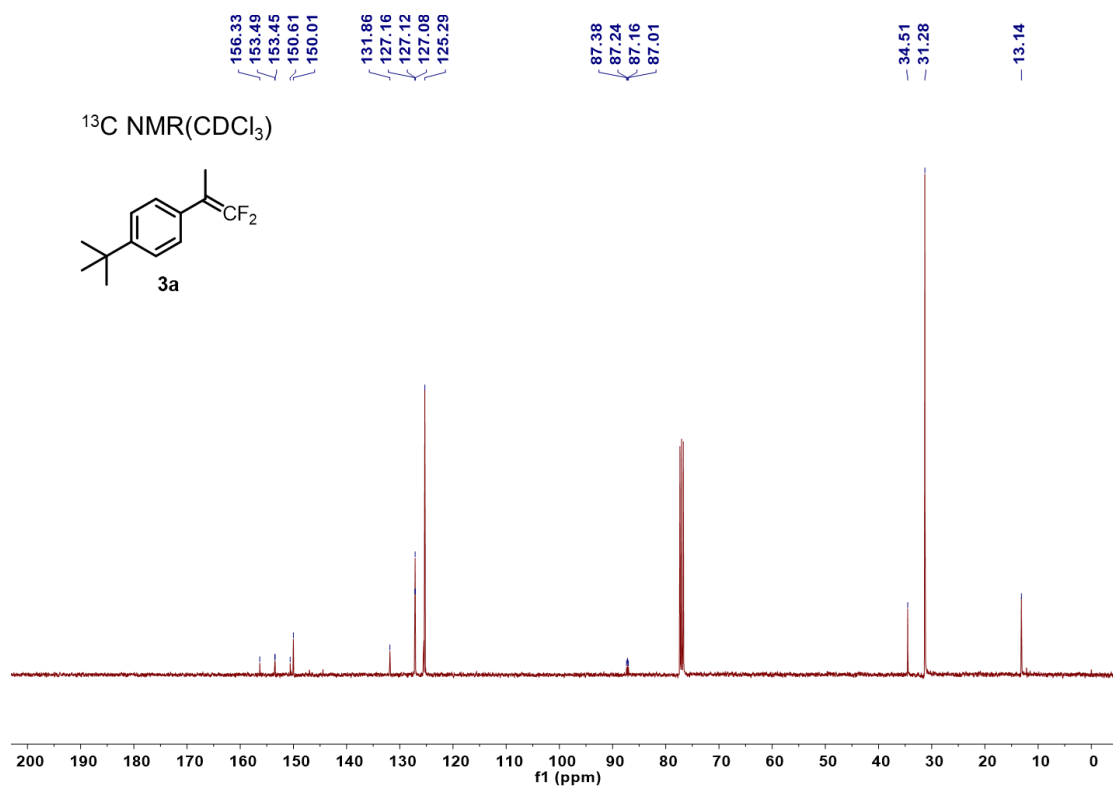

Supplementary Figure 64. <sup>13</sup>C NMR Spectrum of **3a**.

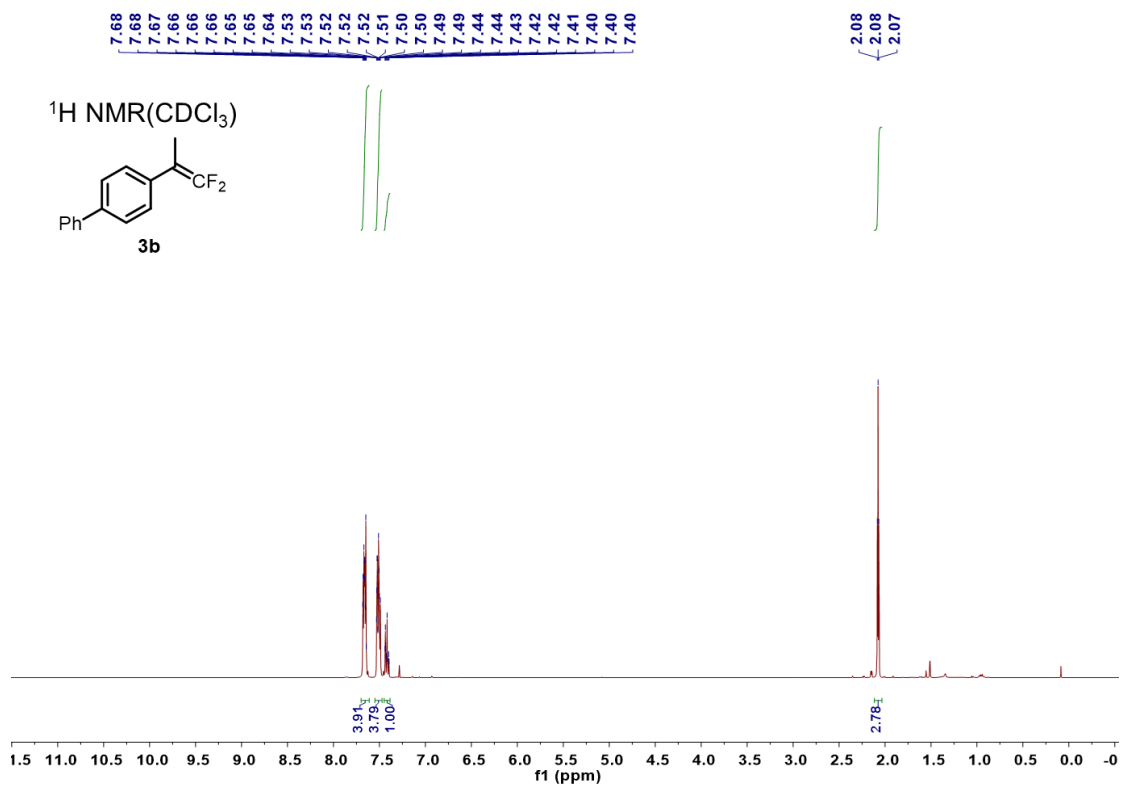

Supplementary Figure 65. <sup>1</sup>H NMR Spectrum of **3b**.

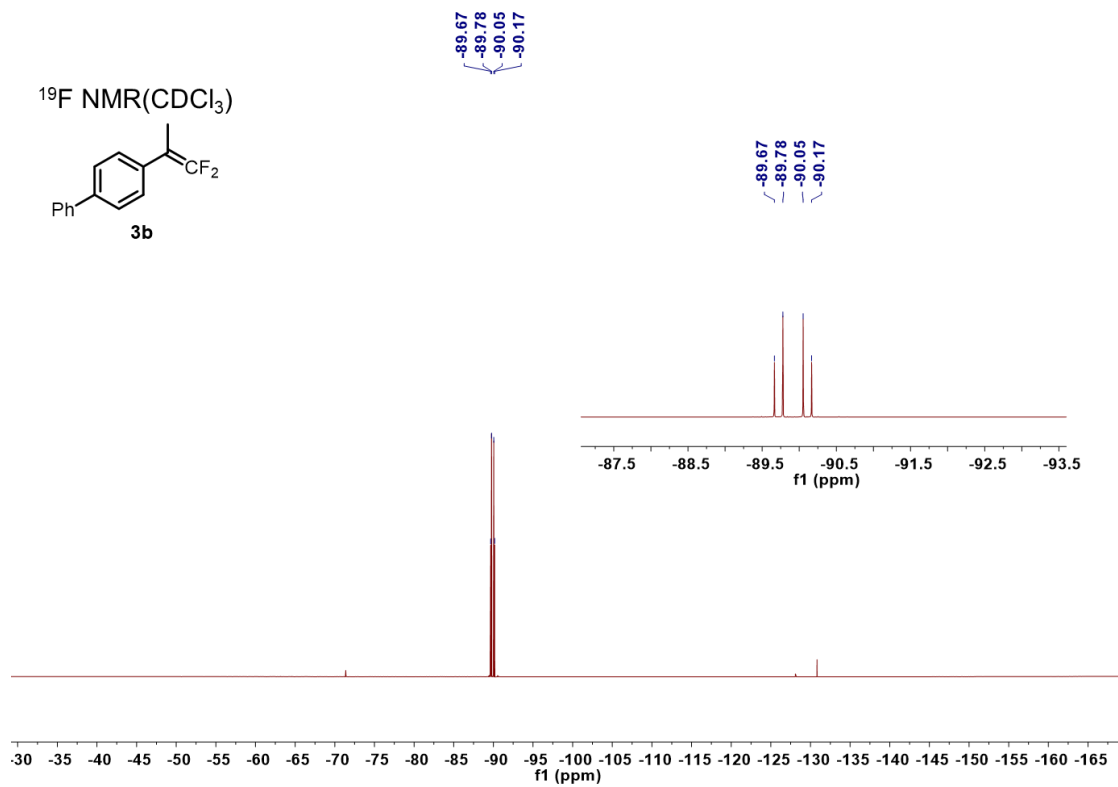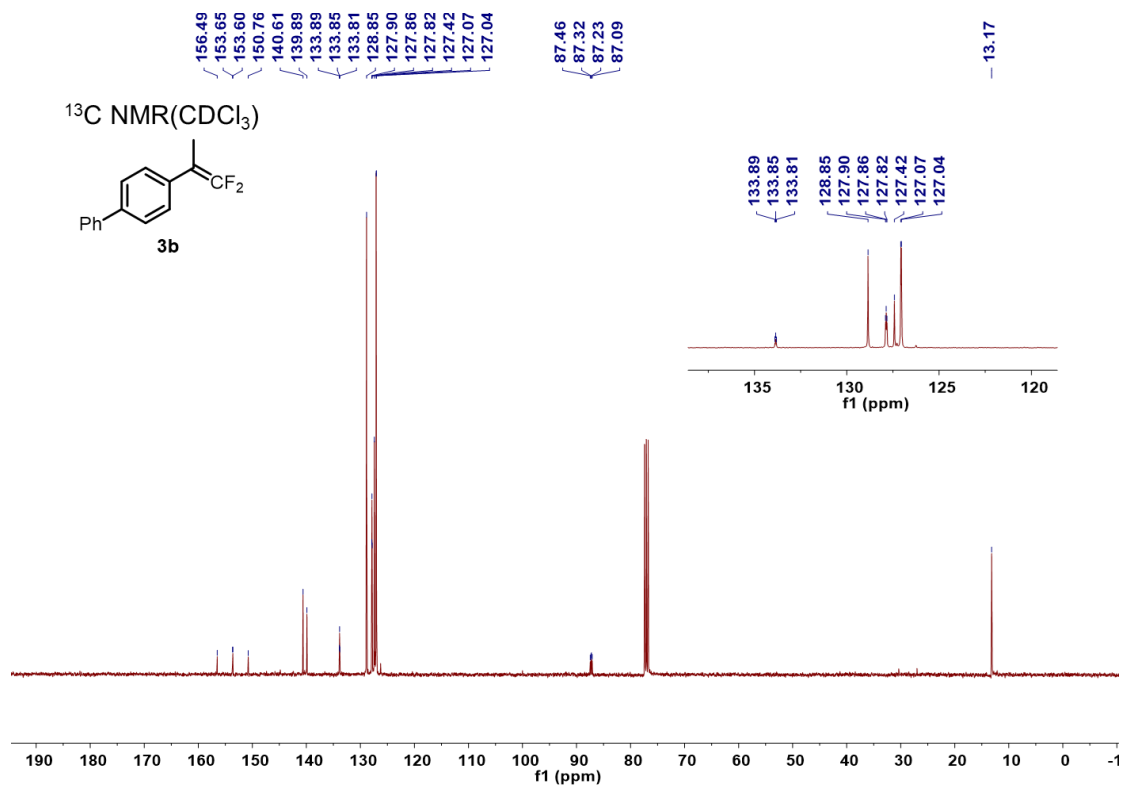

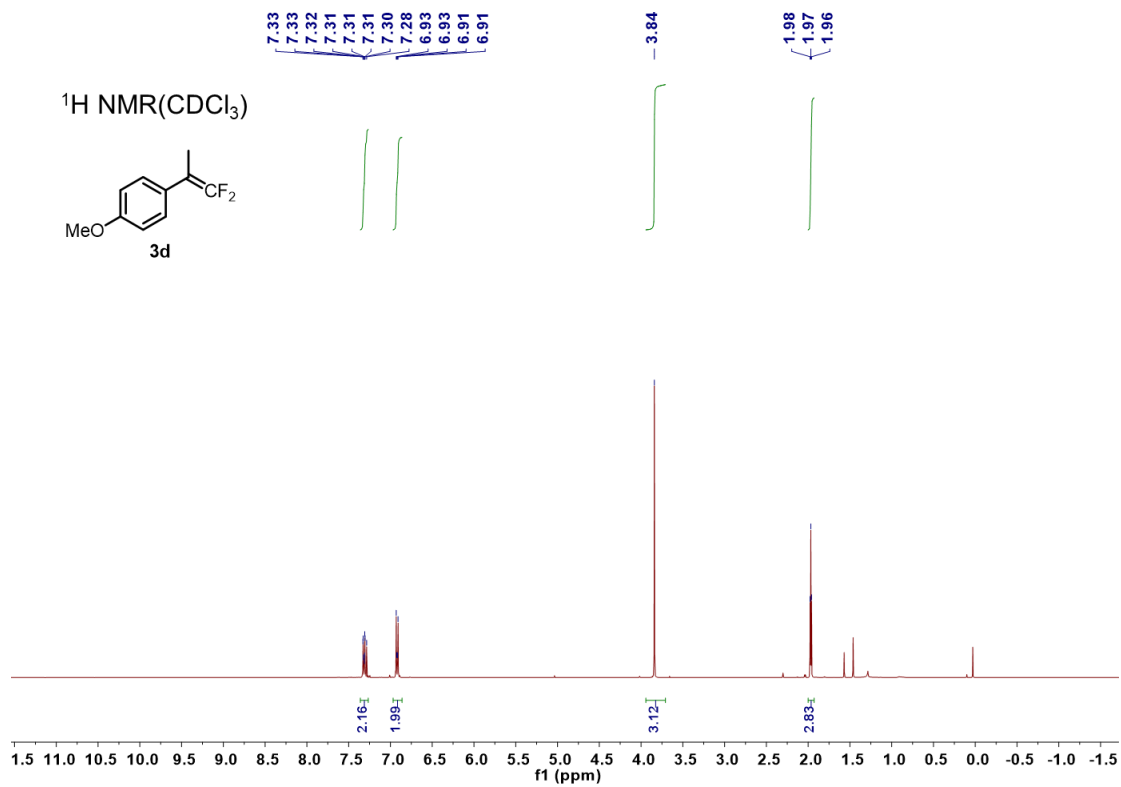

Supplementary Figure 68. <sup>1</sup>H NMR Spectrum of 3d.

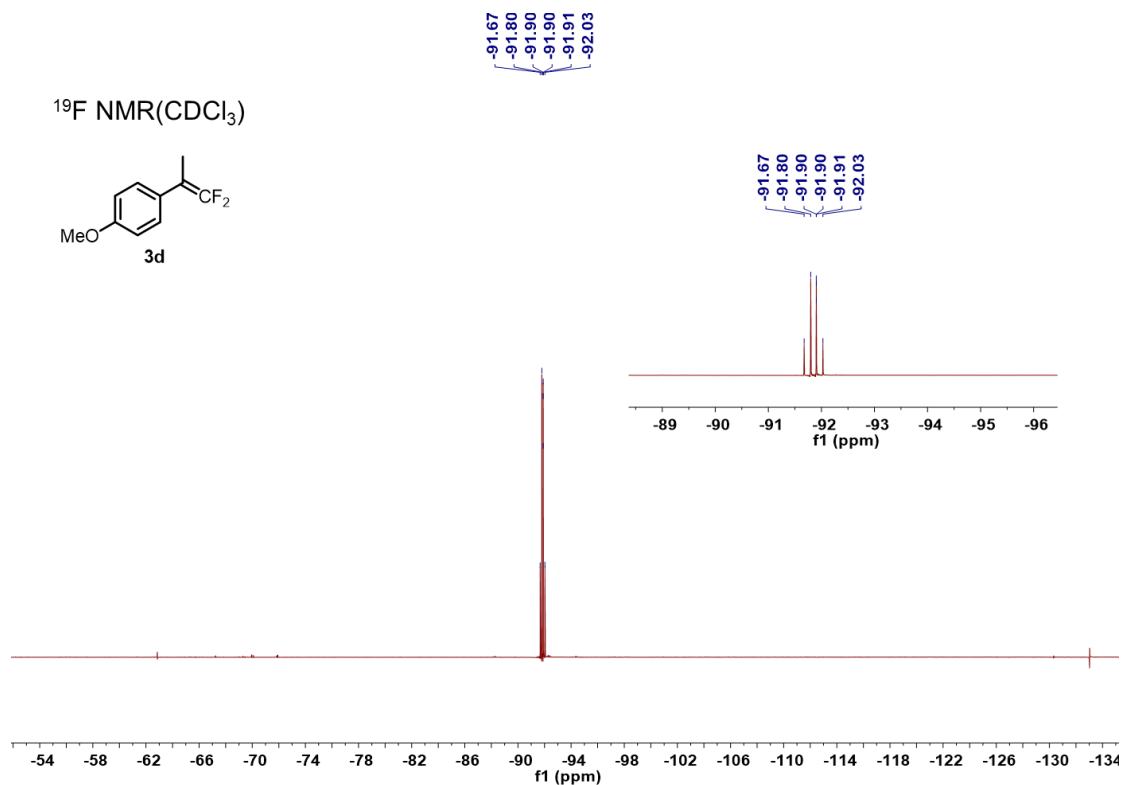

Supplementary Figure 69. <sup>19</sup>F NMR Spectrum of 3d.

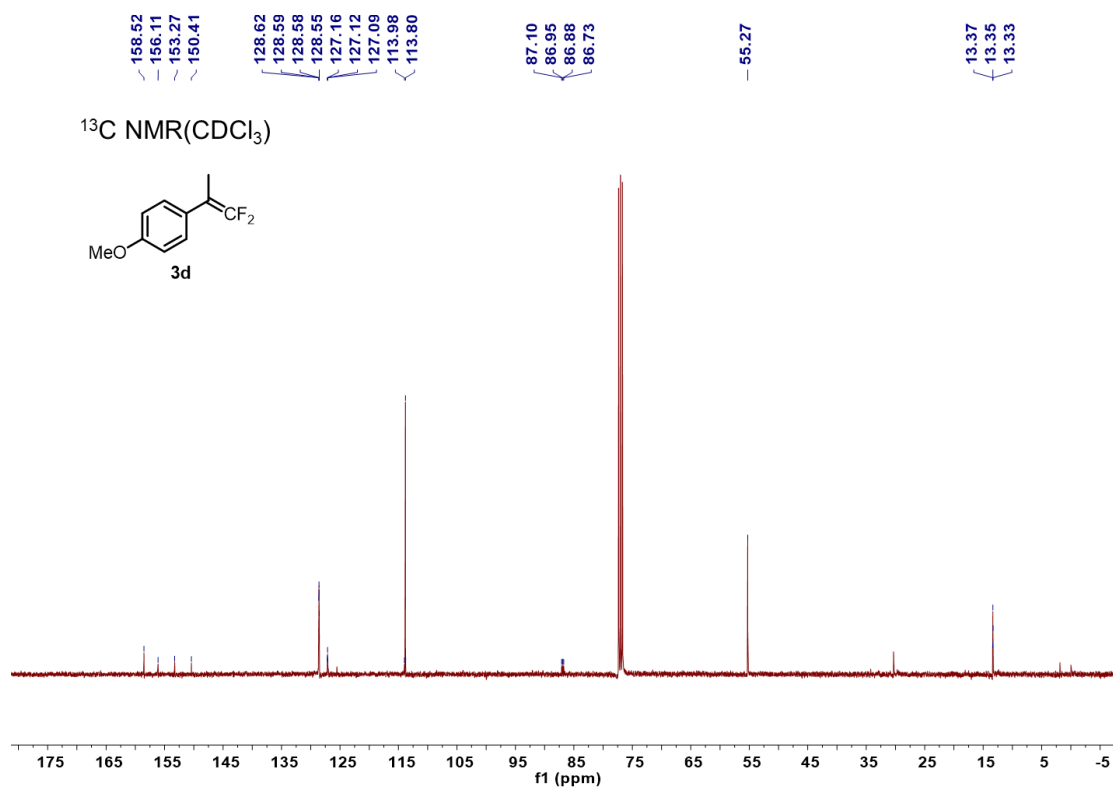

Supplementary Figure 70. <sup>13</sup>C NMR Spectrum of 3d.

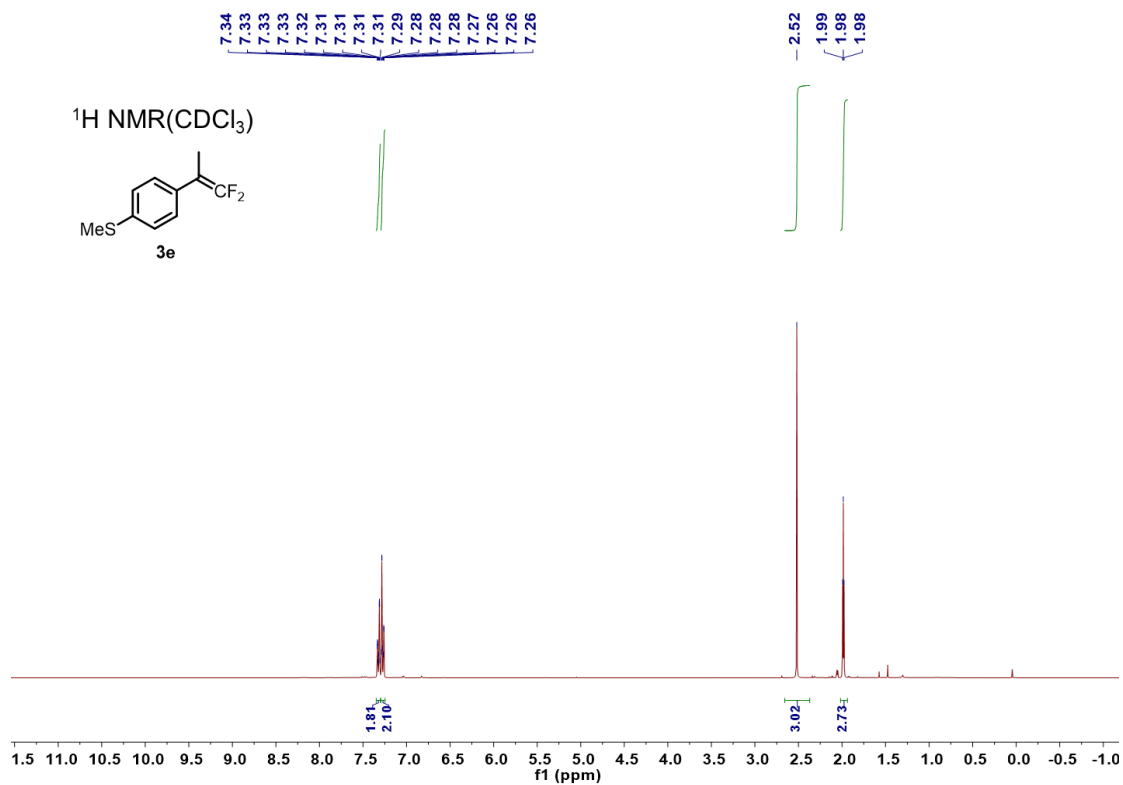

Supplementary Figure 71. <sup>1</sup>H NMR Spectrum of 3e.

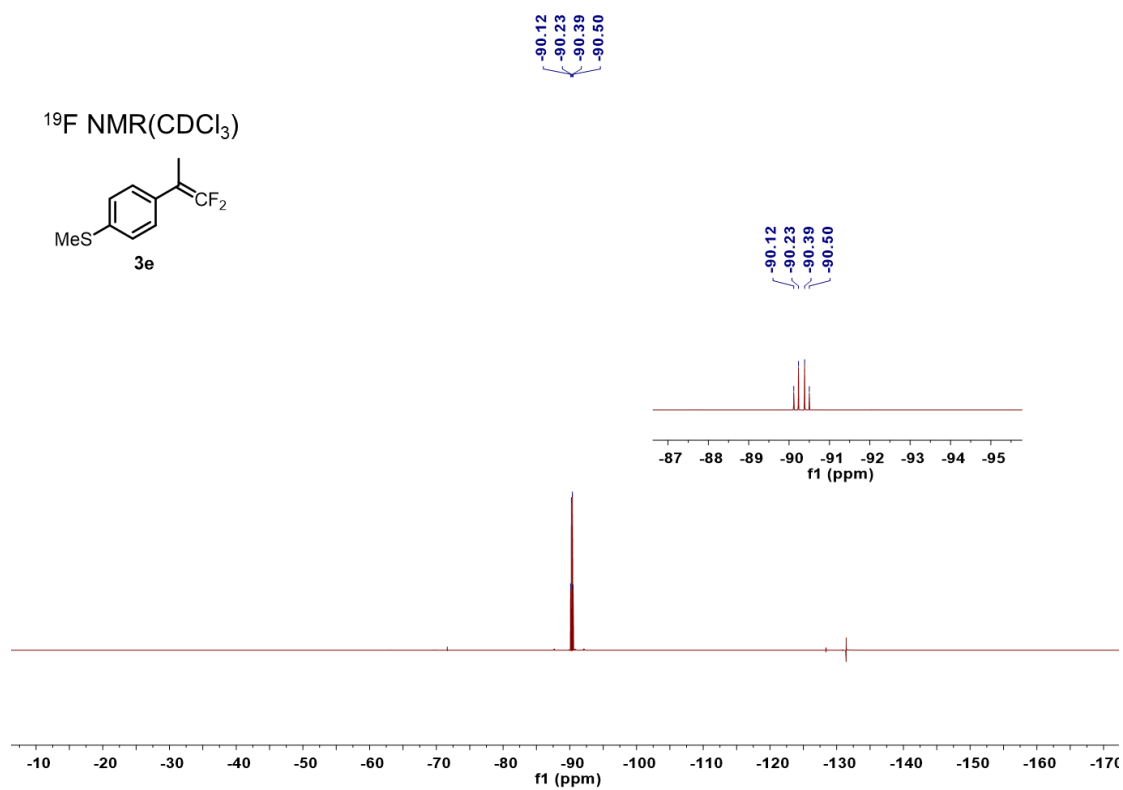

Supplementary Figure 72. <sup>19</sup>F NMR Spectrum of **3e**.

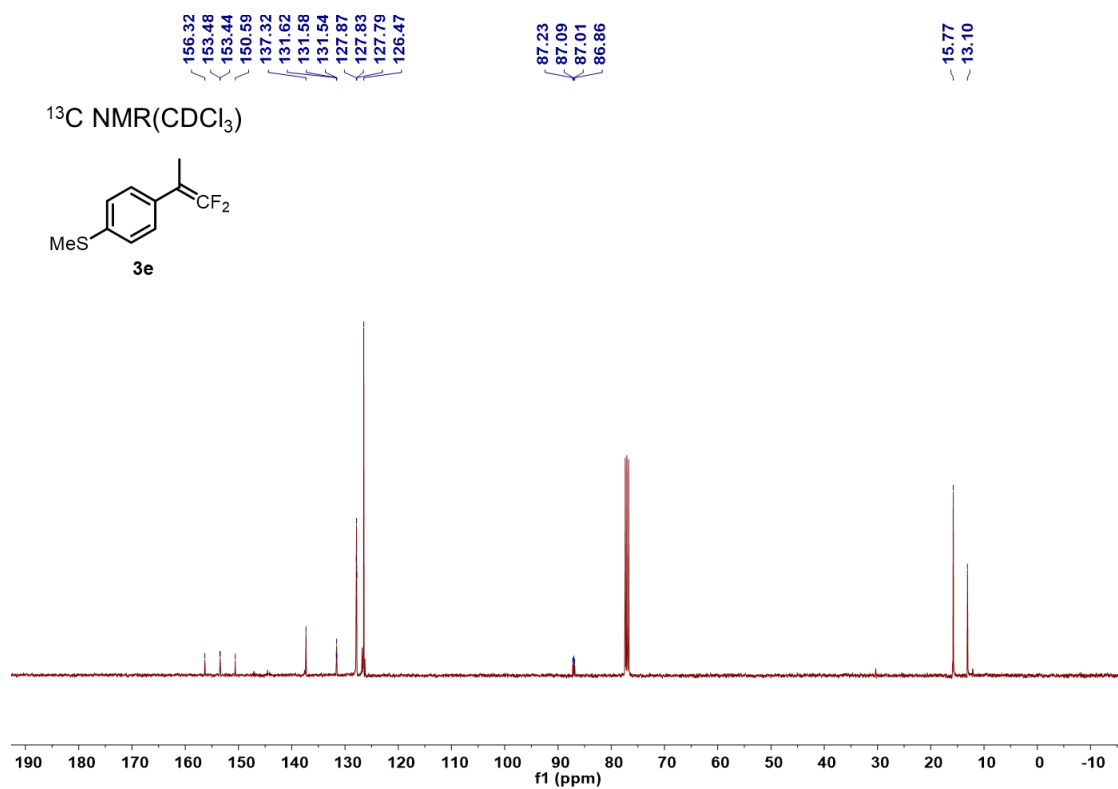

Supplementary Figure 73. <sup>13</sup>C NMR Spectrum of **3e**.

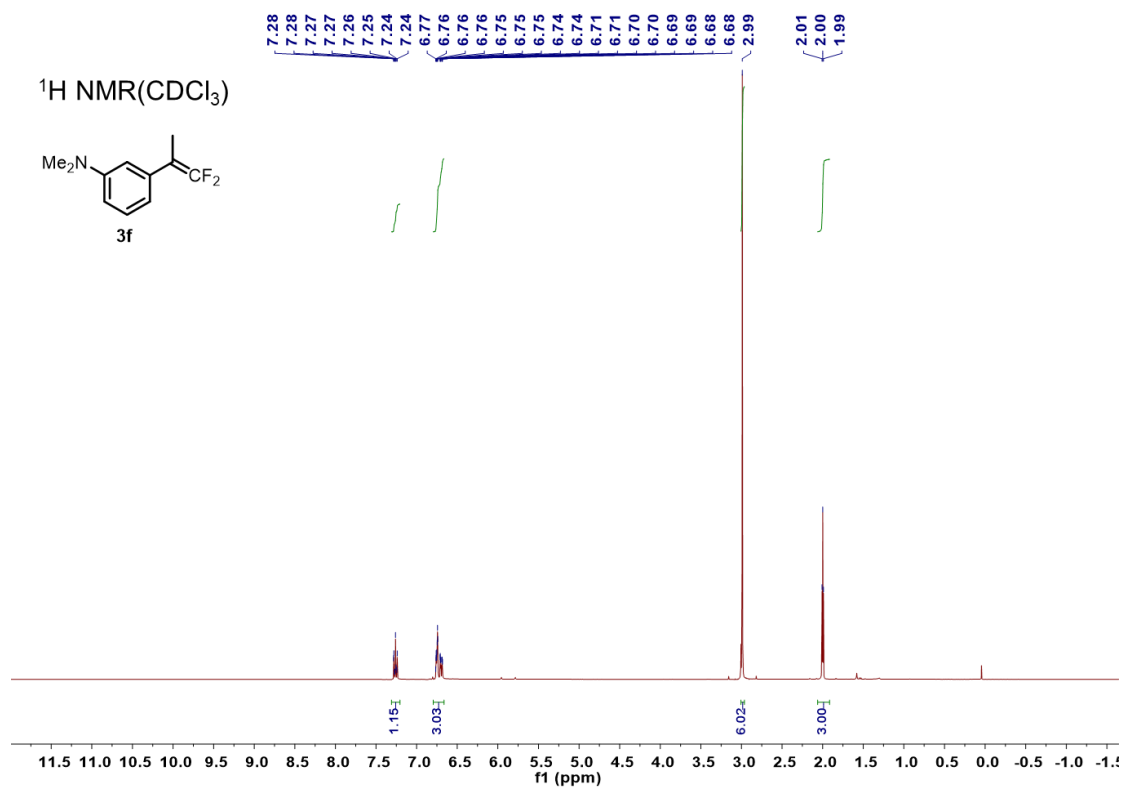

Supplementary Figure 74. <sup>1</sup>H NMR Spectrum of 3f.

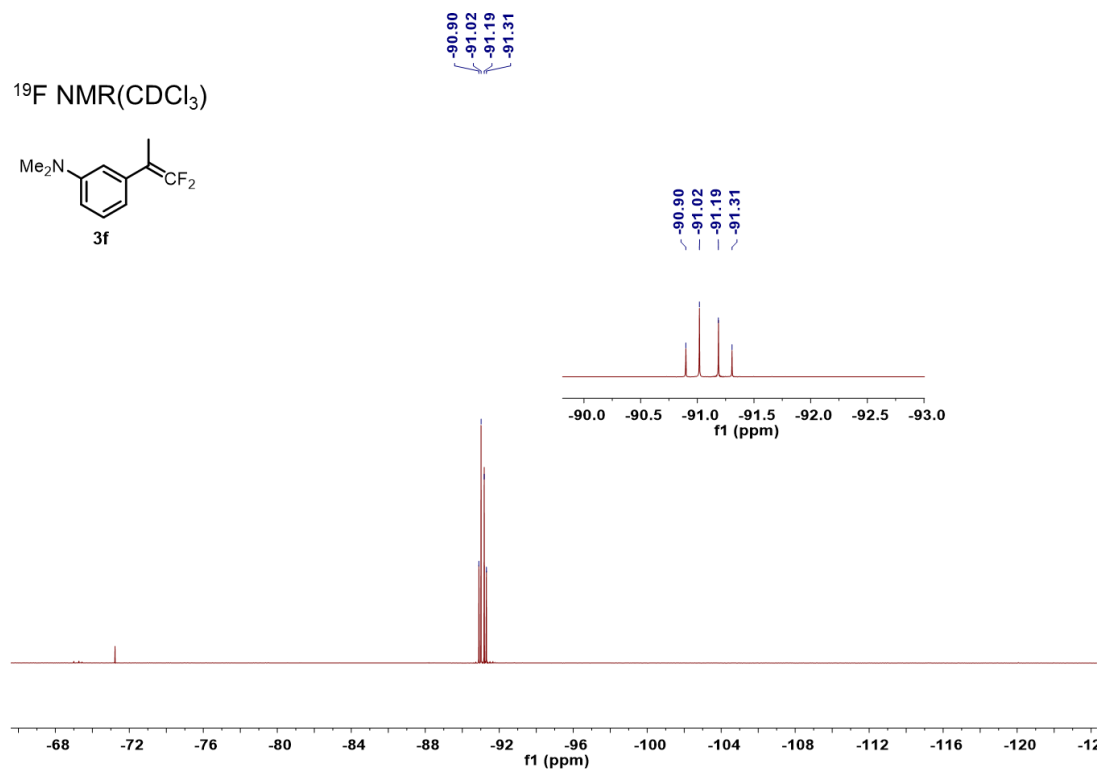

Supplementary Figure 75. <sup>19</sup>F NMR Spectrum of 3f.



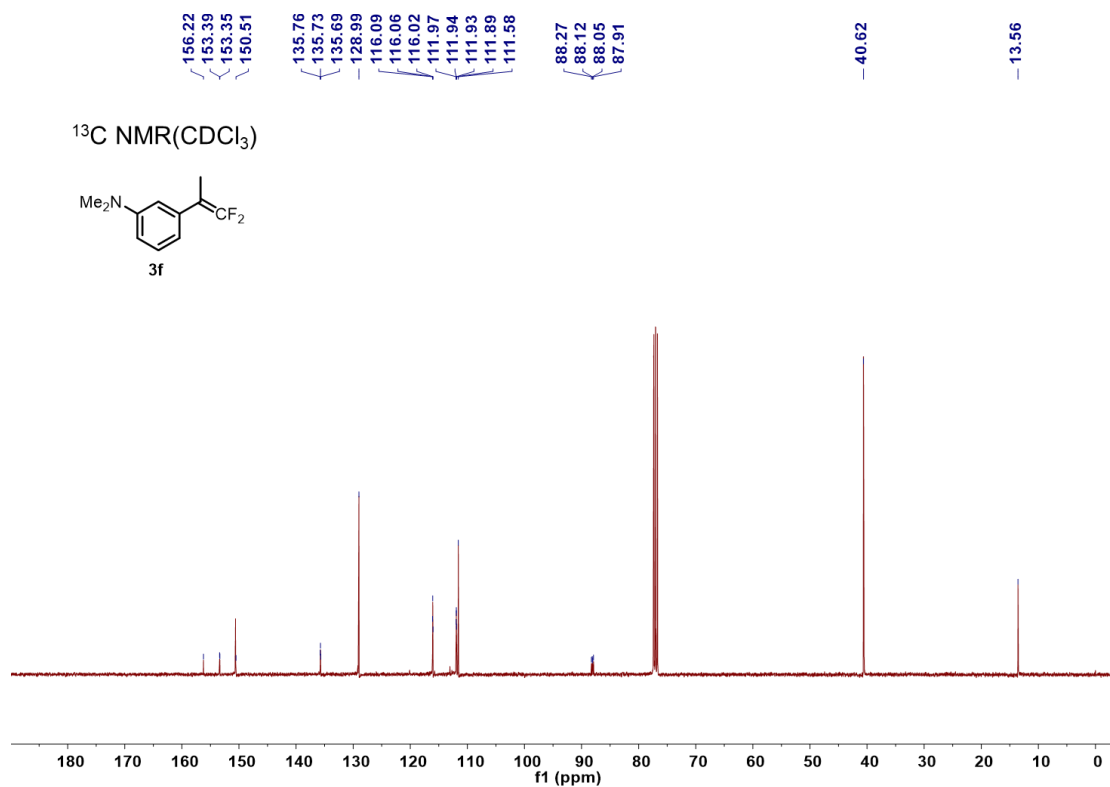

Supplementary Figure 76. <sup>13</sup>C NMR Spectrum of 3f.

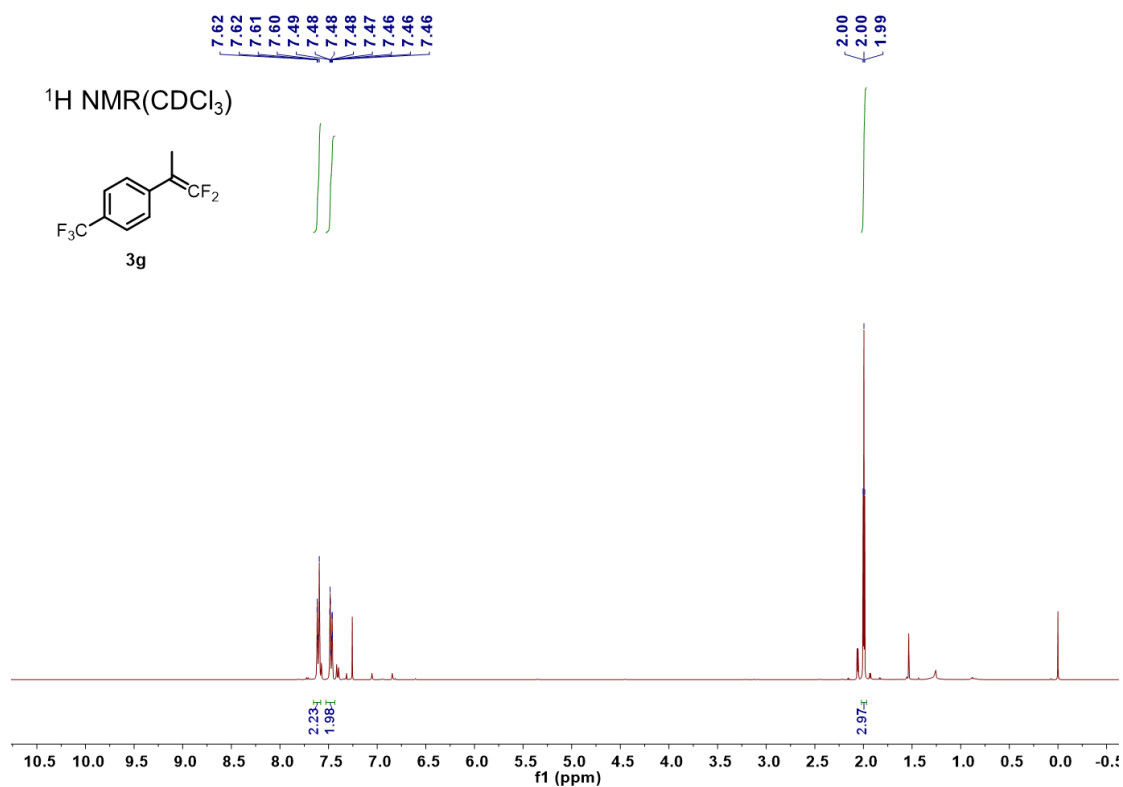

Supplementary Figure 77. <sup>1</sup>H NMR Spectrum of 3g.

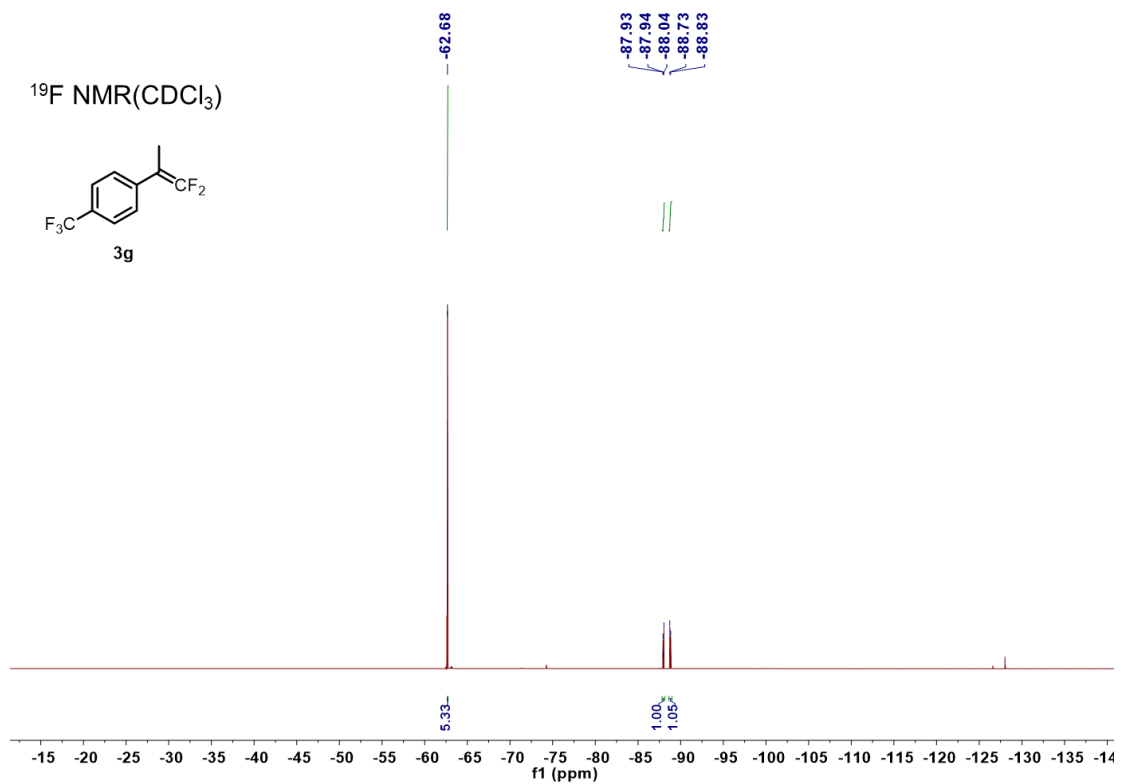

Supplementary Figure 78. <sup>19</sup>F NMR Spectrum of 3g.

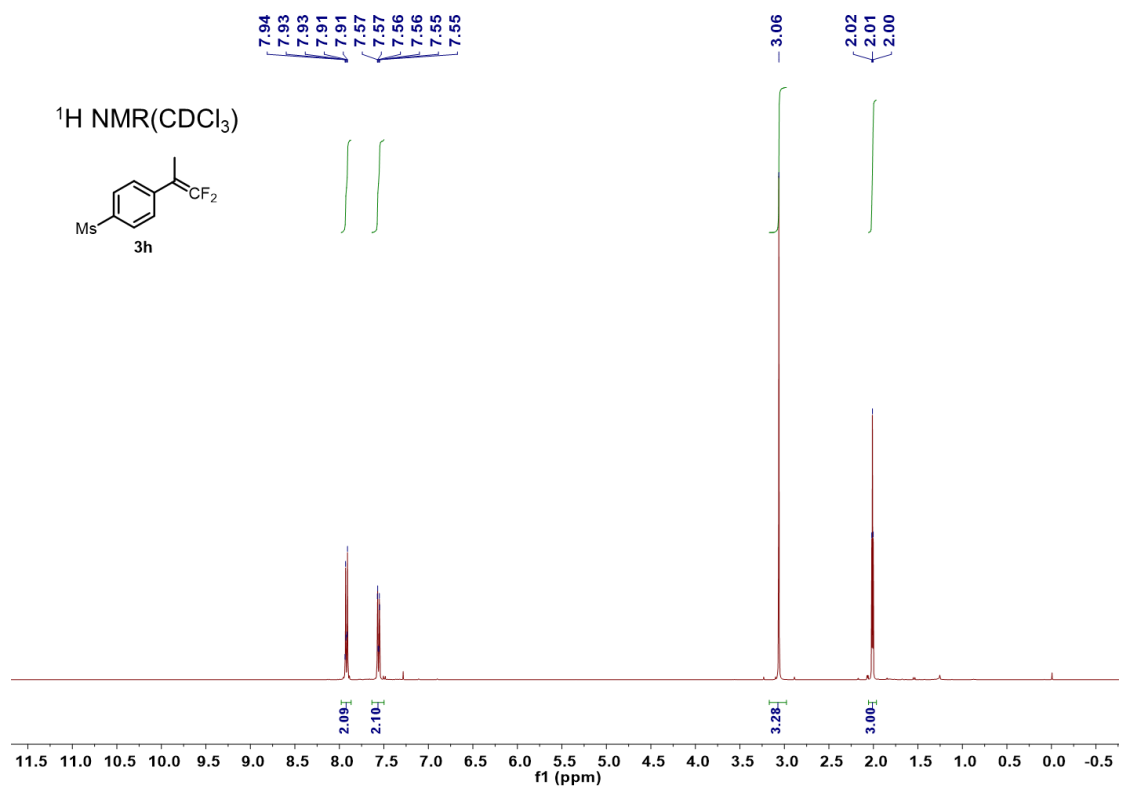

Supplementary Figure 79. <sup>1</sup>H NMR Spectrum of 3h.

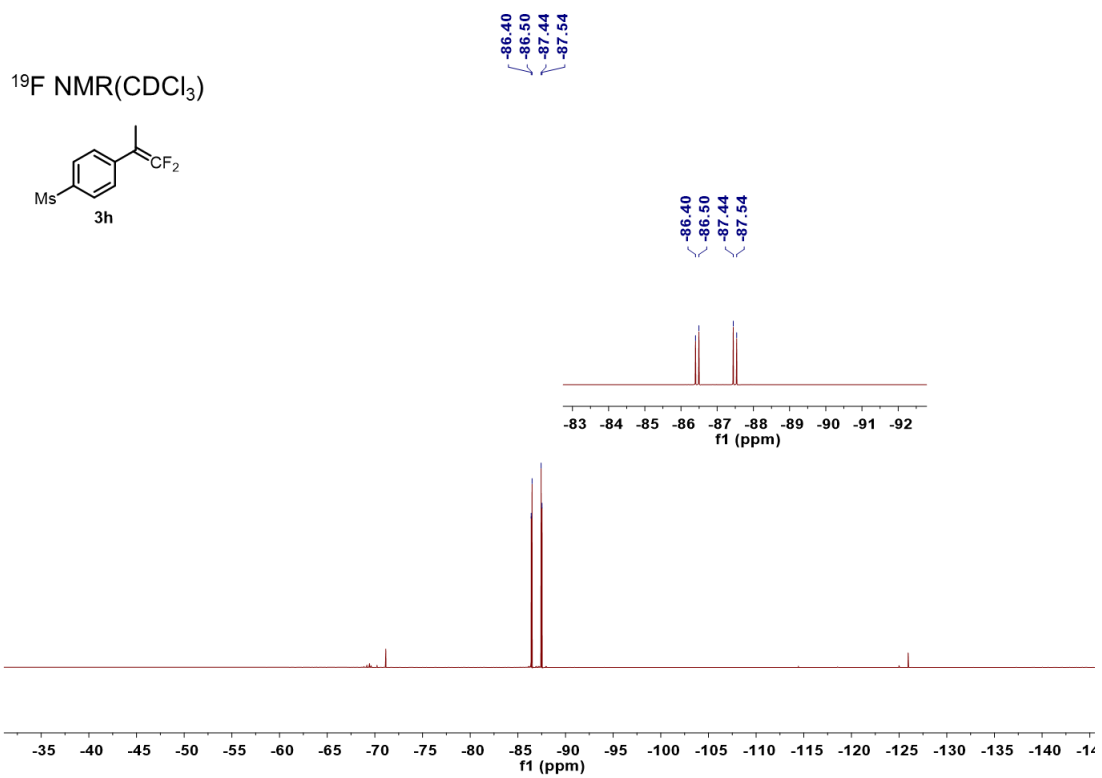

Supplementary Figure 80. <sup>19</sup>F NMR Spectrum of 3h.

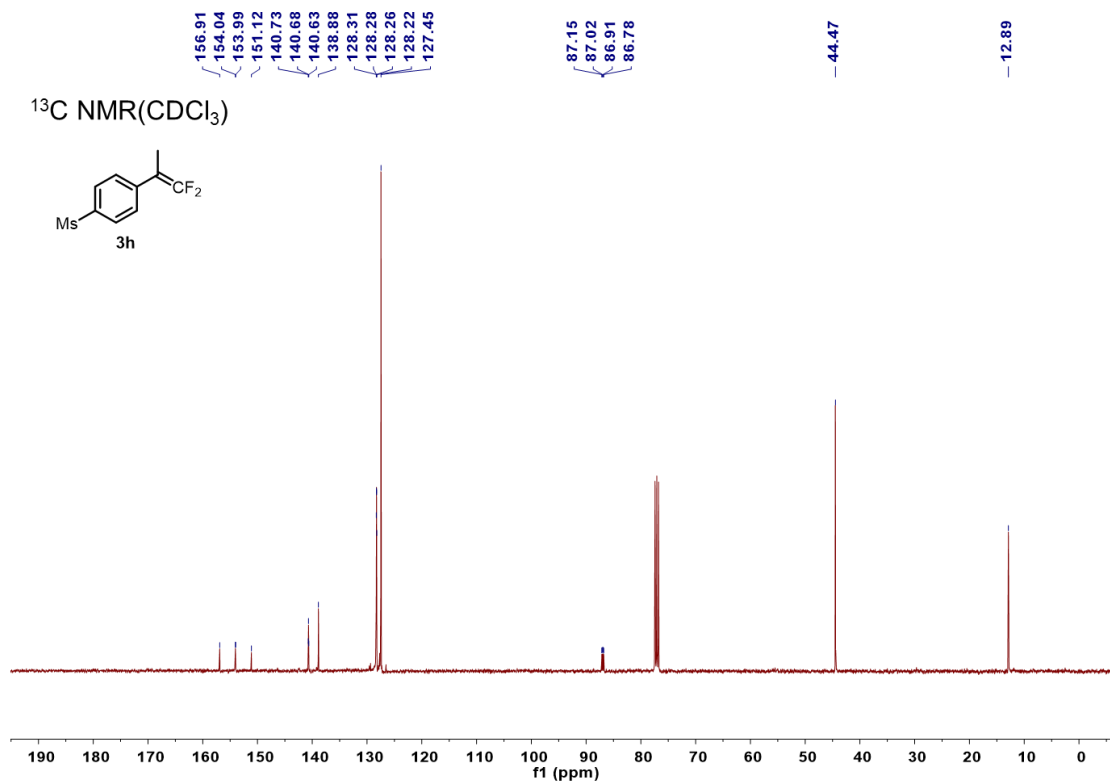

Supplementary Figure 81. <sup>13</sup>C NMR Spectrum of 3h.

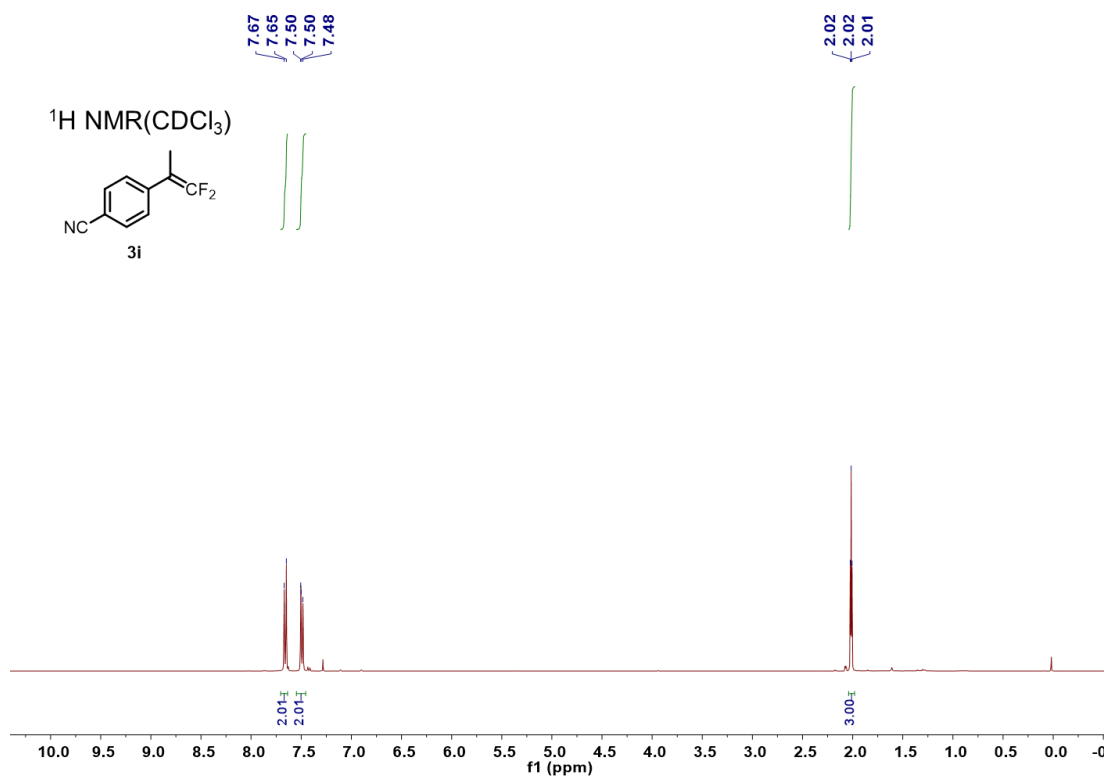

Supplementary Figure 82. <sup>1</sup>H NMR Spectrum of 3i.

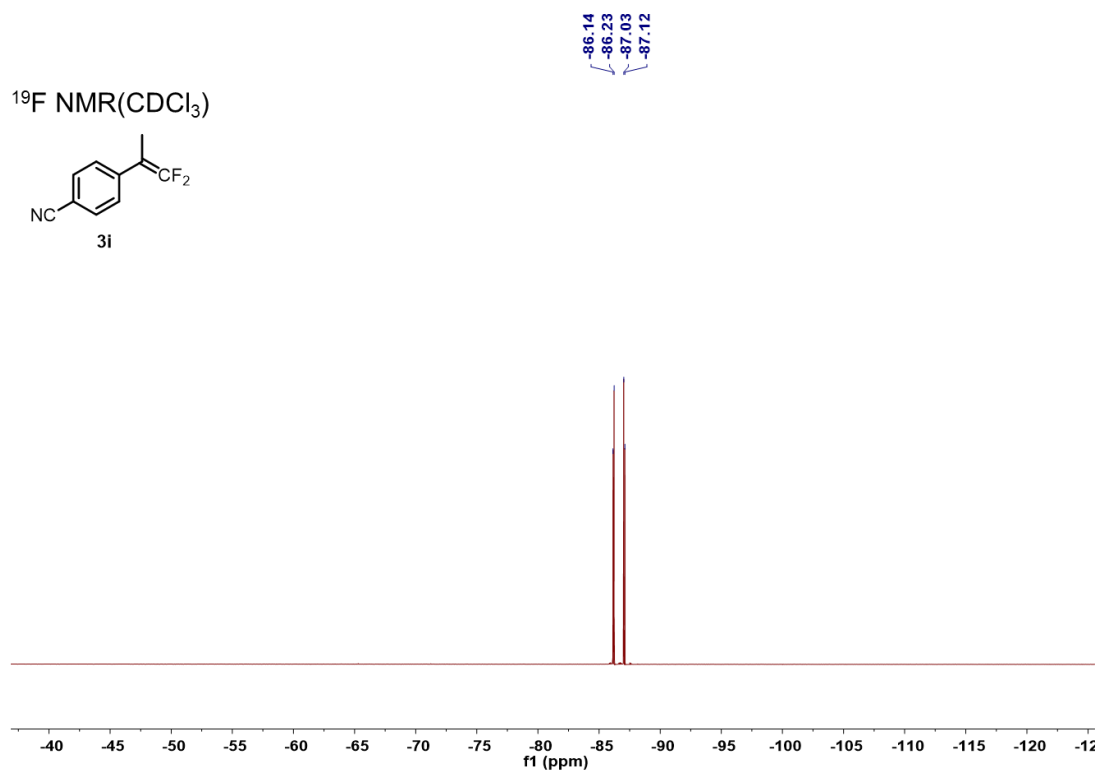

Supplementary Figure 83. <sup>19</sup>F NMR Spectrum of 3i.

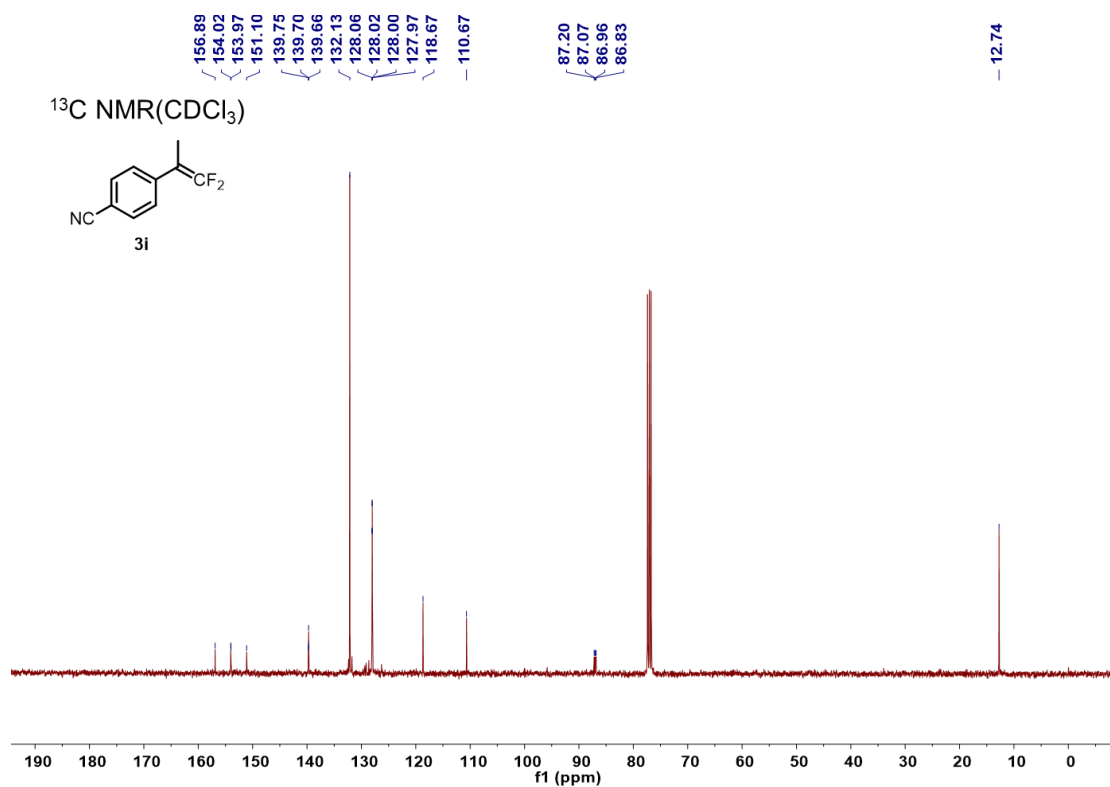

Supplementary Figure 84. <sup>13</sup>C NMR Spectrum of 3i.

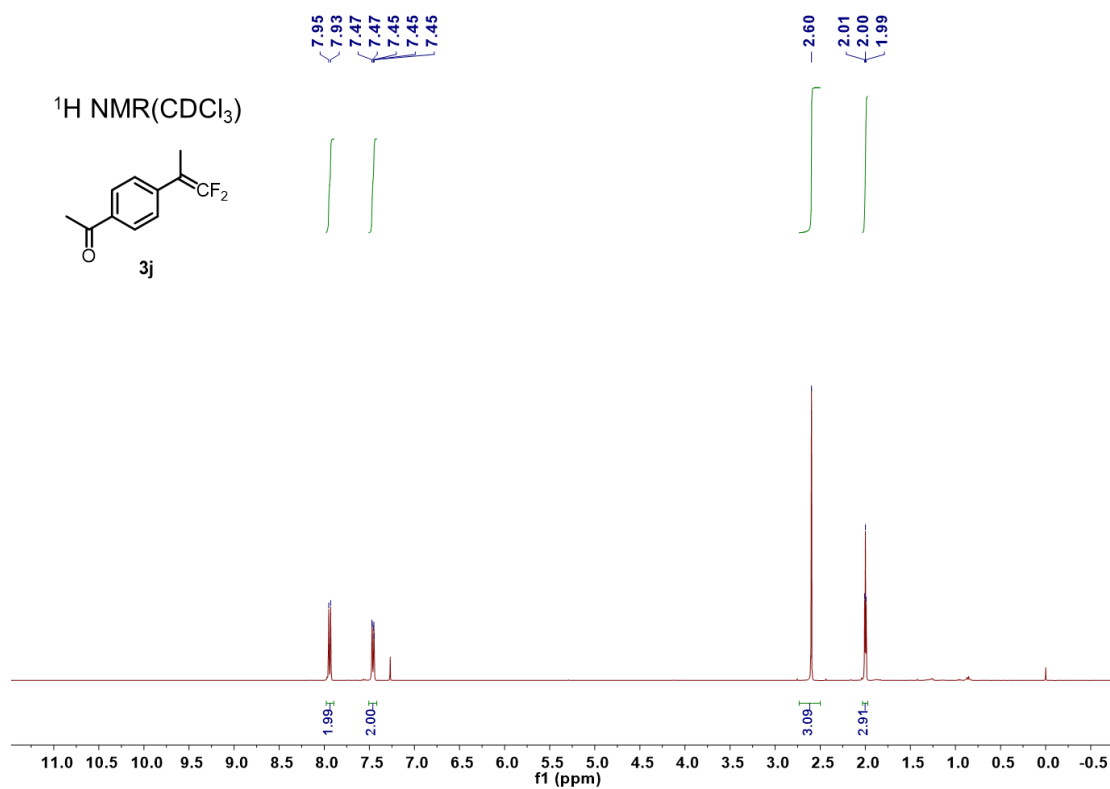

Supplementary Figure 85. <sup>1</sup>H NMR Spectrum of 3j.

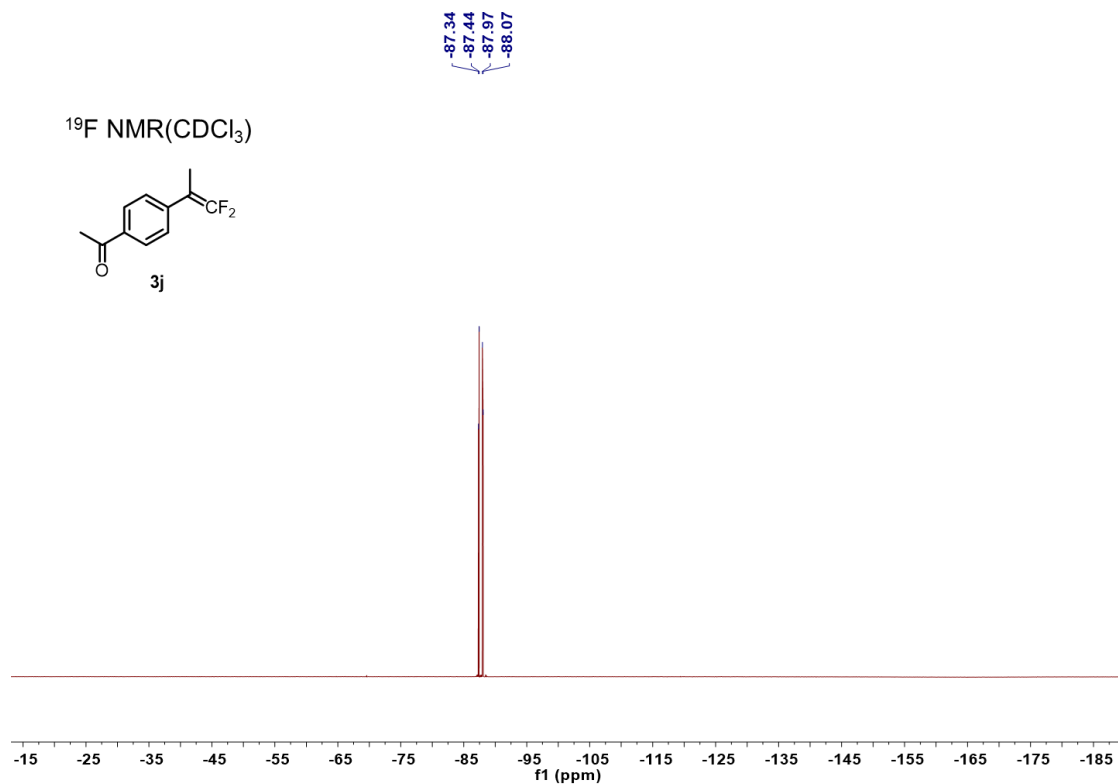

Supplementary Figure 86. <sup>19</sup>F NMR Spectrum of 3j.

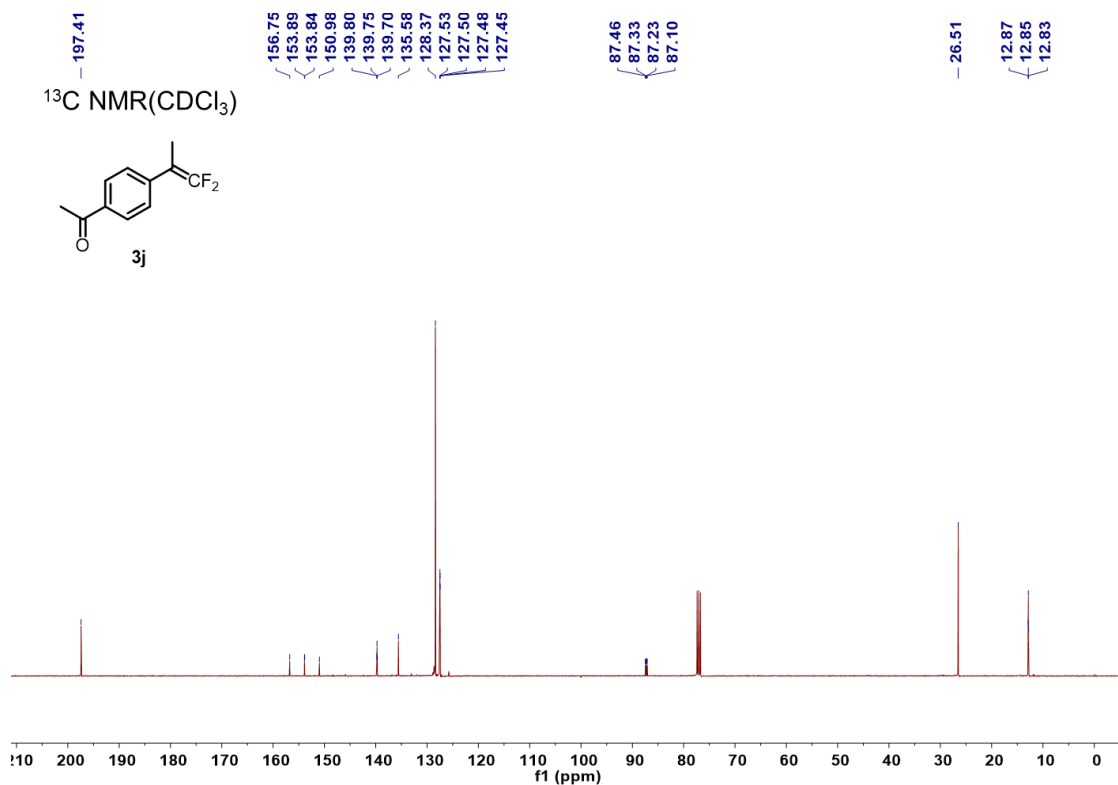

Supplementary Figure 87. <sup>13</sup>C NMR Spectrum of 3j.

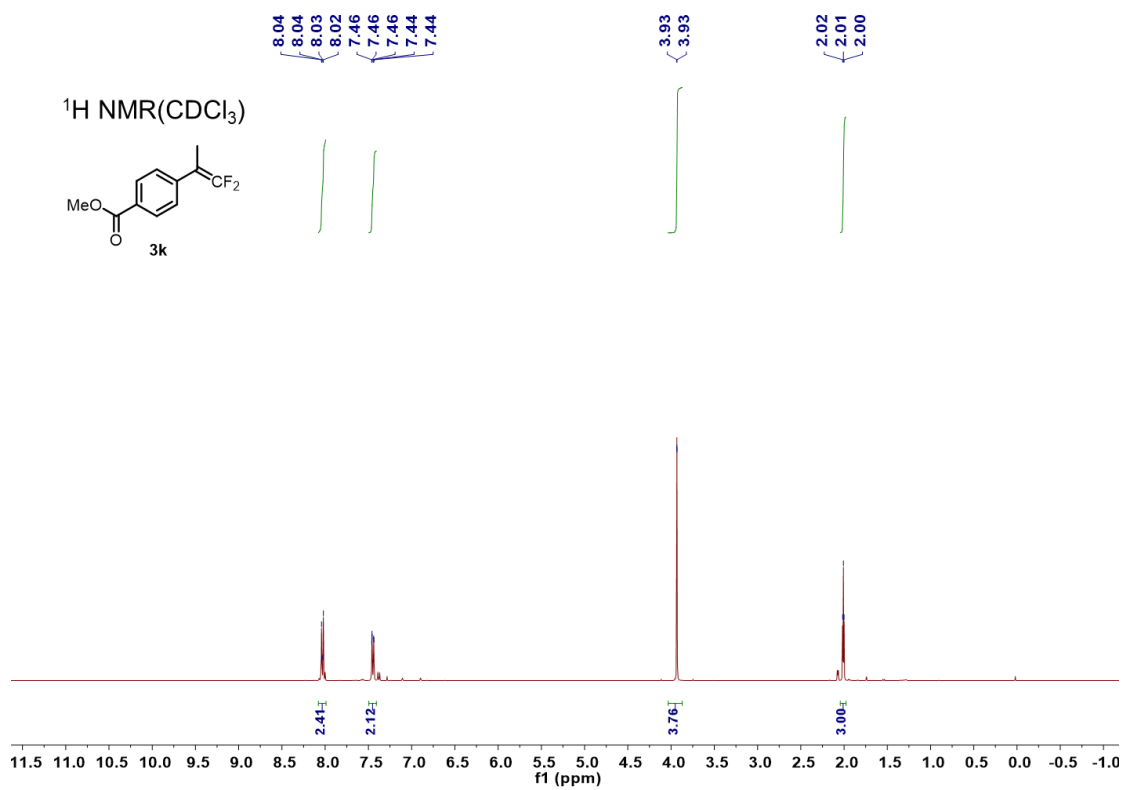

Supplementary Figure 88. <sup>1</sup>H NMR Spectrum of 3k.

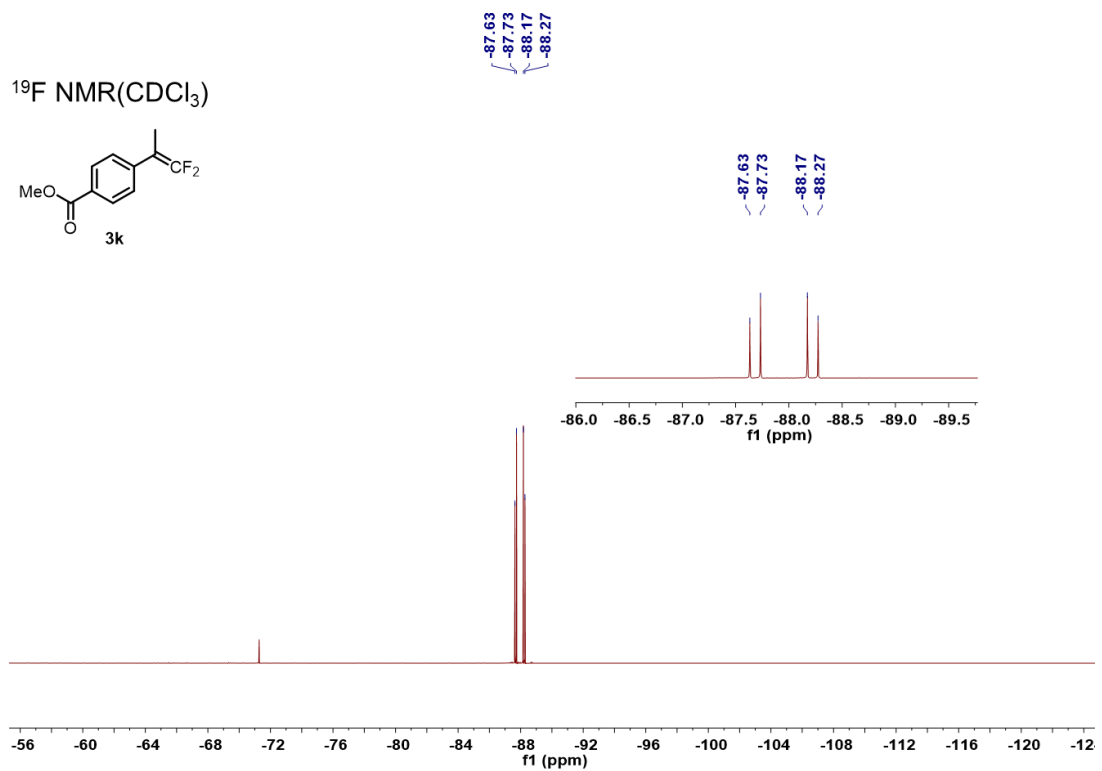

Supplementary Figure 89. <sup>19</sup>F NMR Spectrum of 3k.

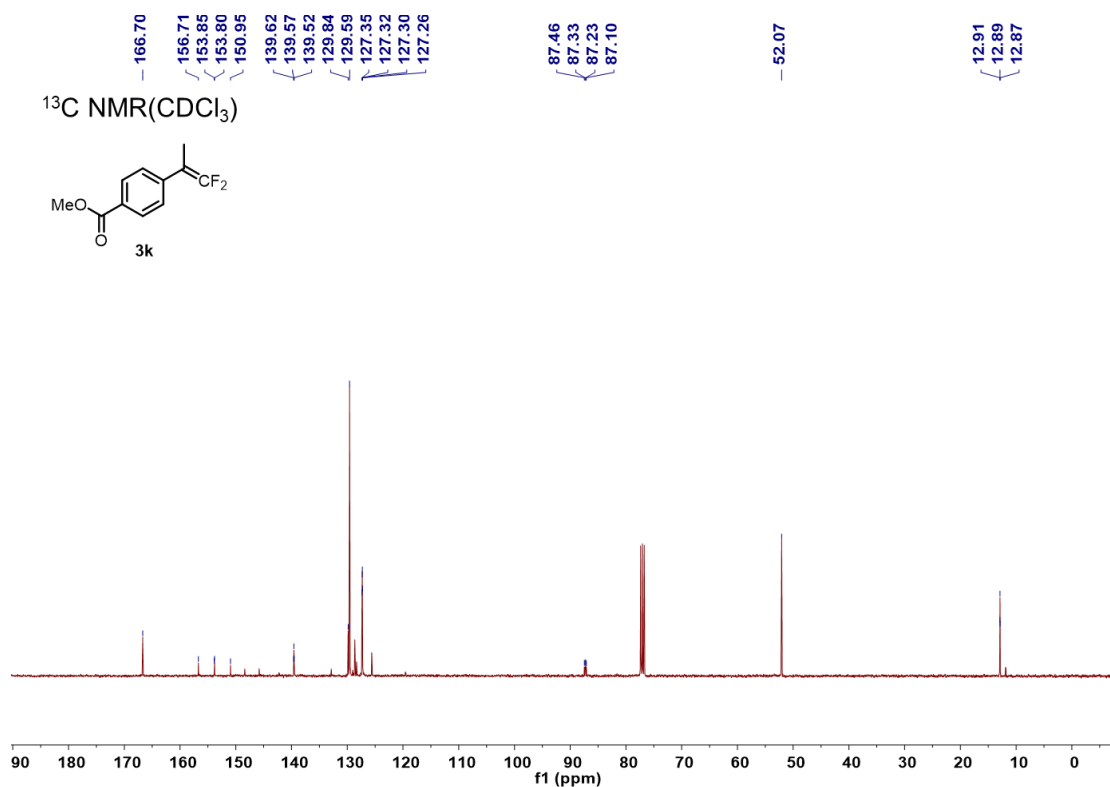

Supplementary Figure 90. <sup>13</sup>C NMR Spectrum of **3k**.

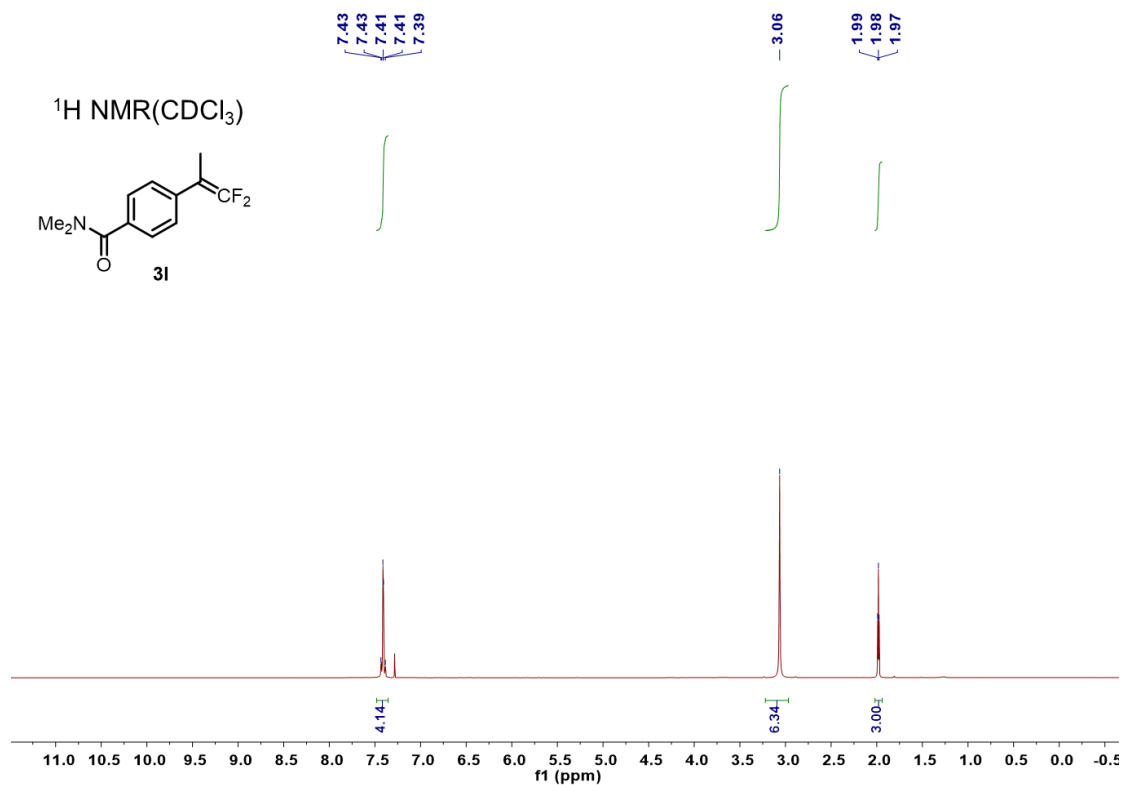

Supplementary Figure 91. <sup>1</sup>H NMR Spectrum of **3l**.



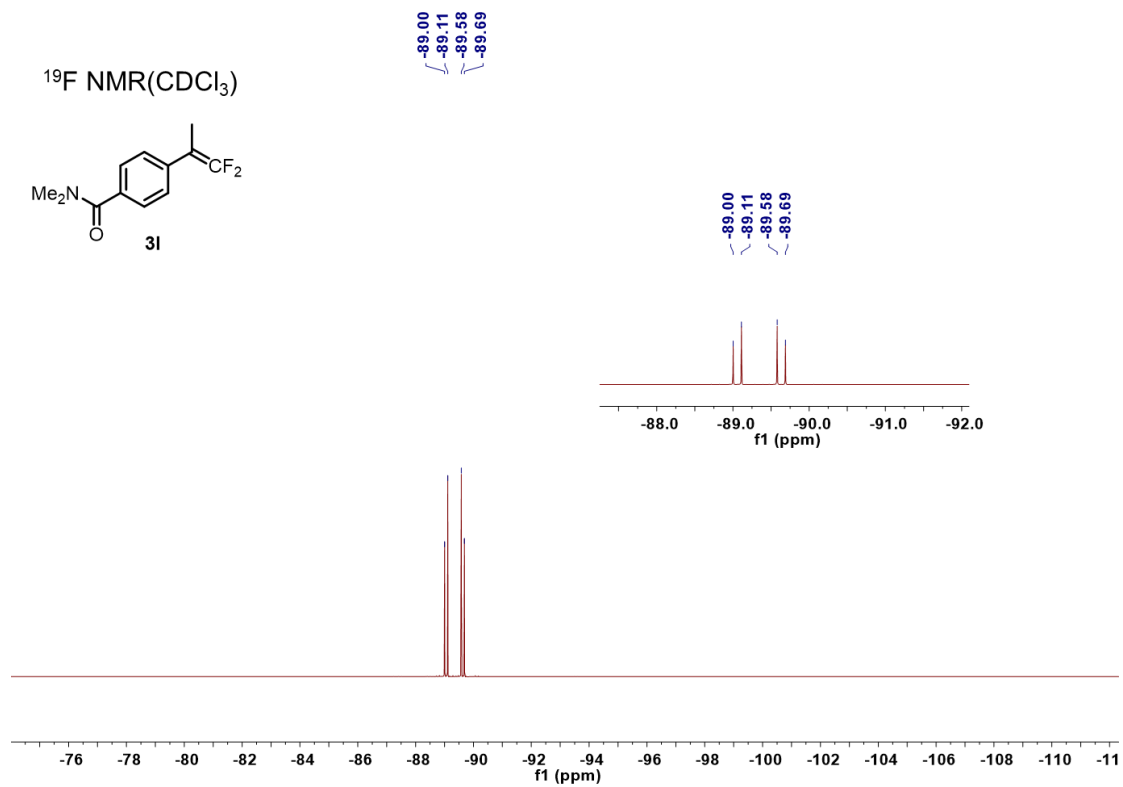

Supplementary Figure 92. <sup>19</sup>F NMR Spectrum of 31.

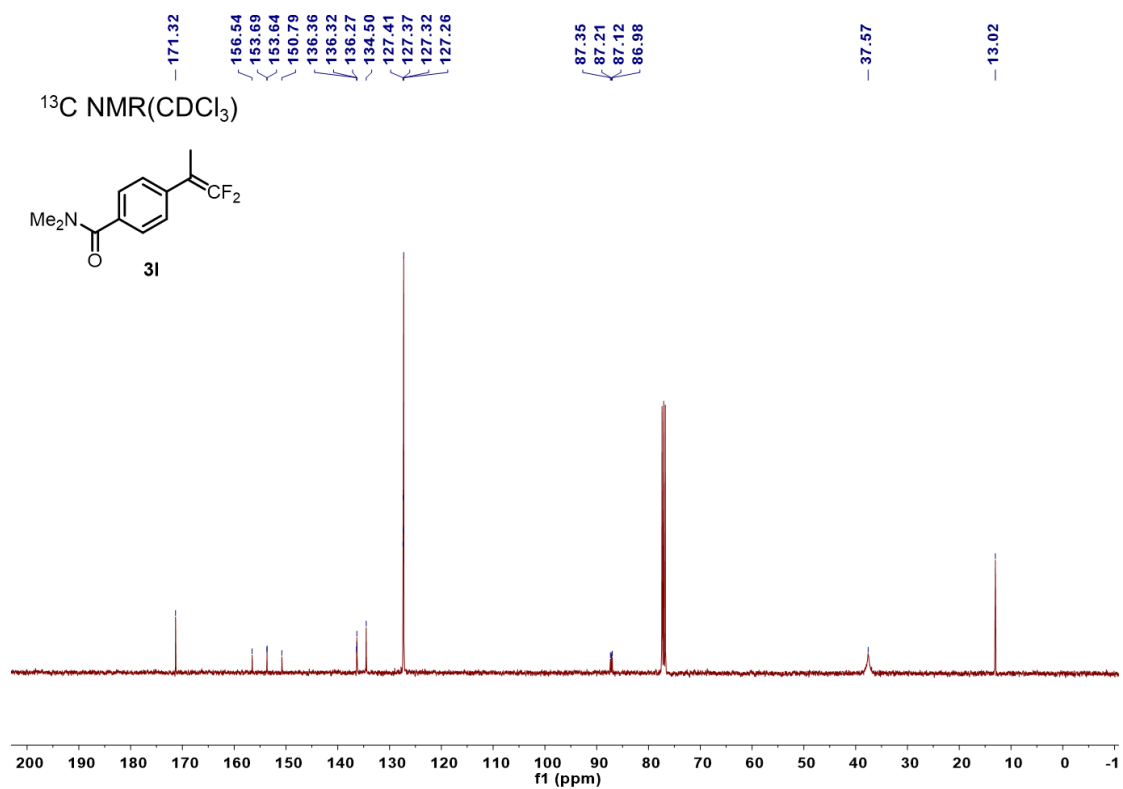

Supplementary Figure 93. <sup>13</sup>C NMR Spectrum of 31.

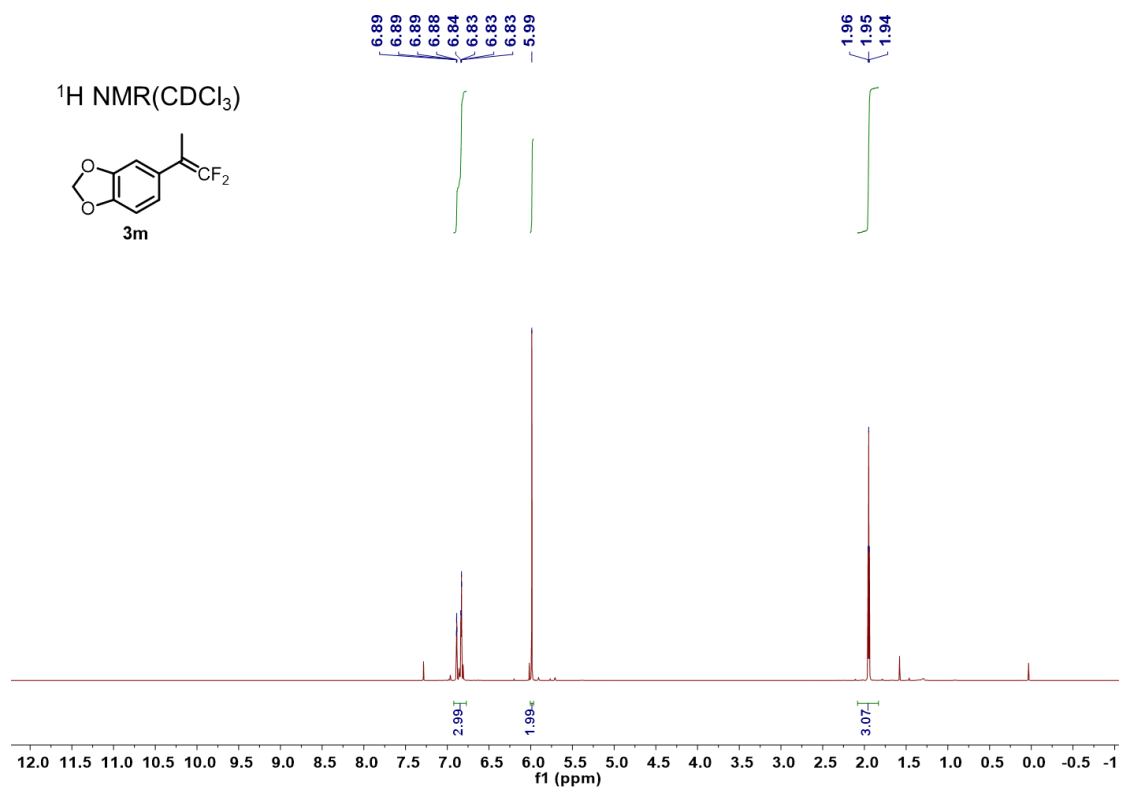

Supplementary Figure 94. <sup>1</sup>H NMR Spectrum of **3m**.

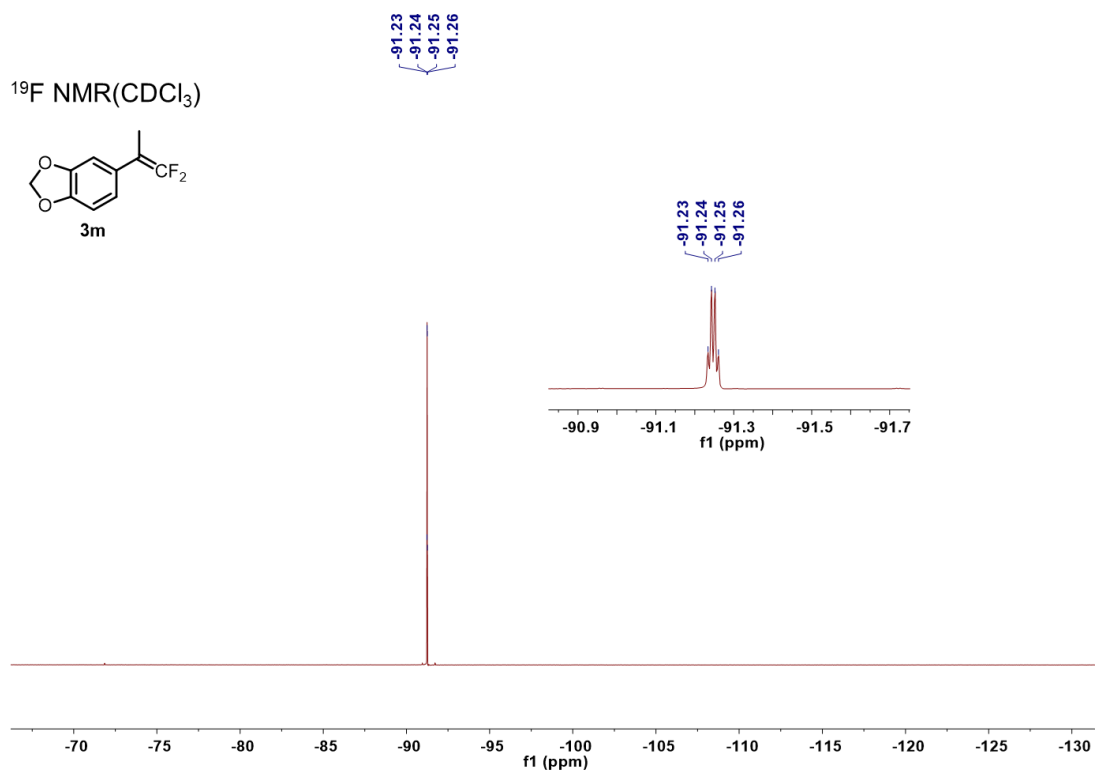

Supplementary Figure 95. <sup>19</sup>F NMR Spectrum of **3m**.

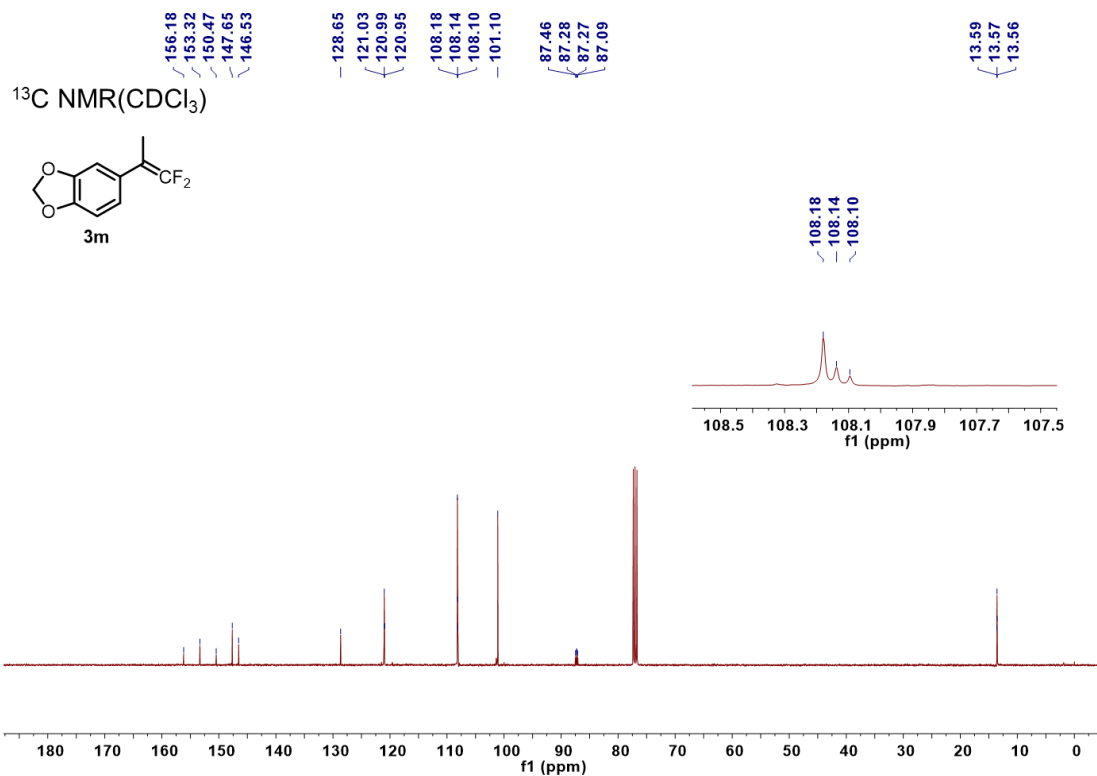

Supplementary Figure 96. <sup>13</sup>C NMR Spectrum of 3m.

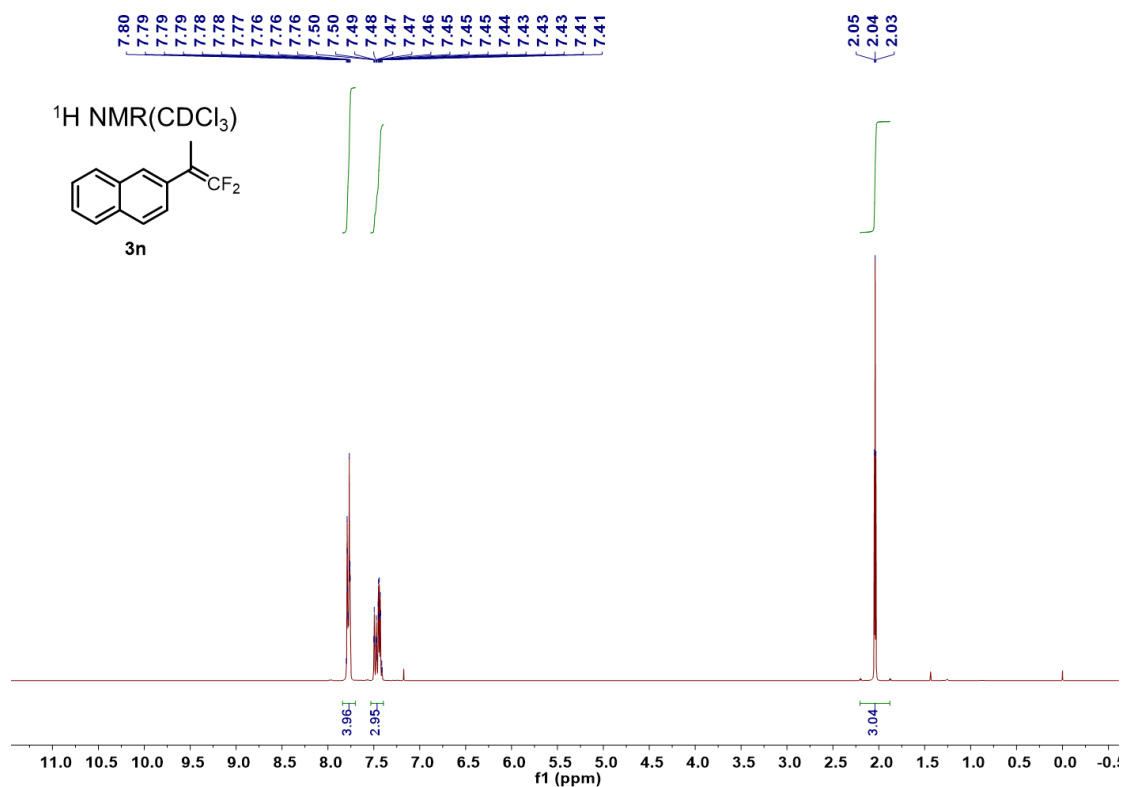

Supplementary Figure 97. <sup>1</sup>H NMR Spectrum of 3n.

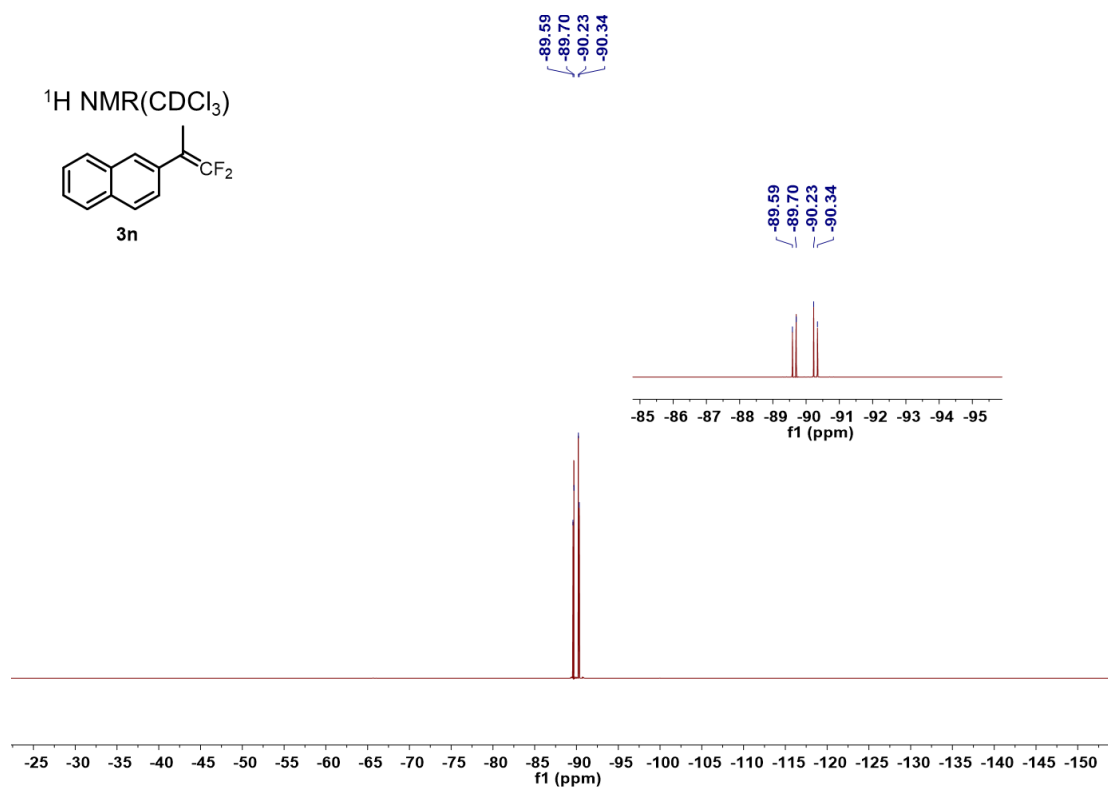

Supplementary Figure 98. <sup>19</sup>F NMR Spectrum of 3n.

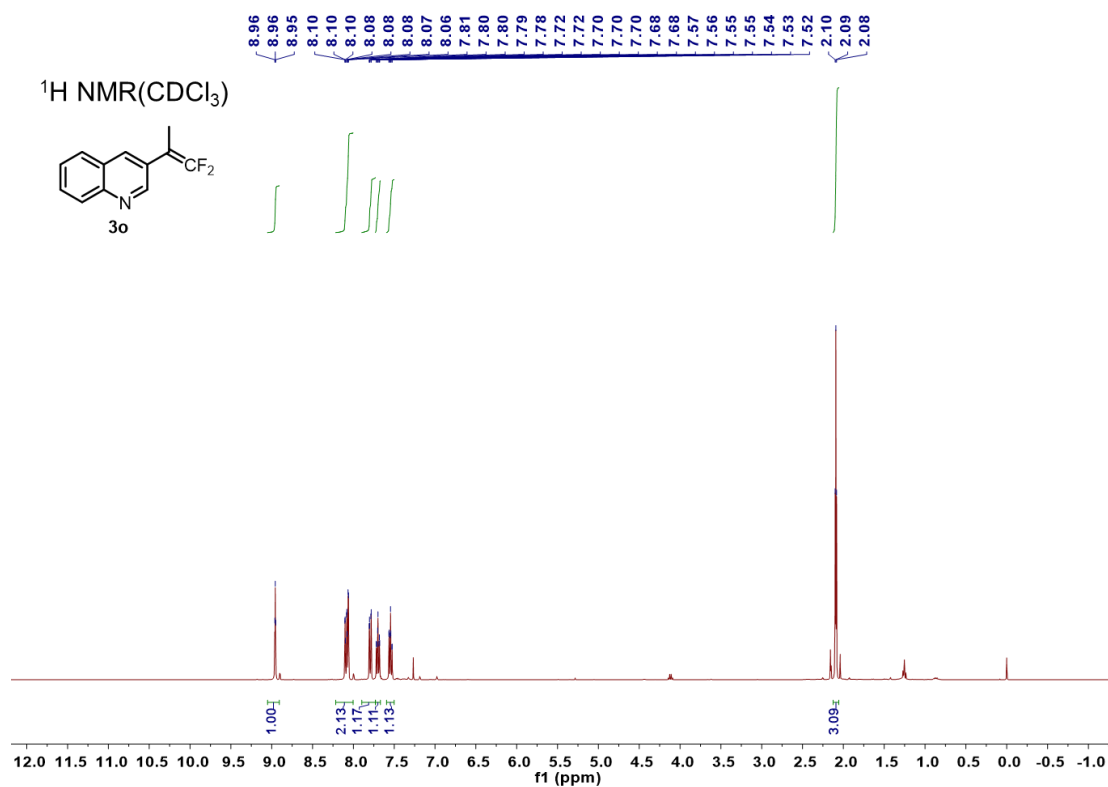

Supplementary Figure 99. <sup>1</sup>H NMR Spectrum of 3o.

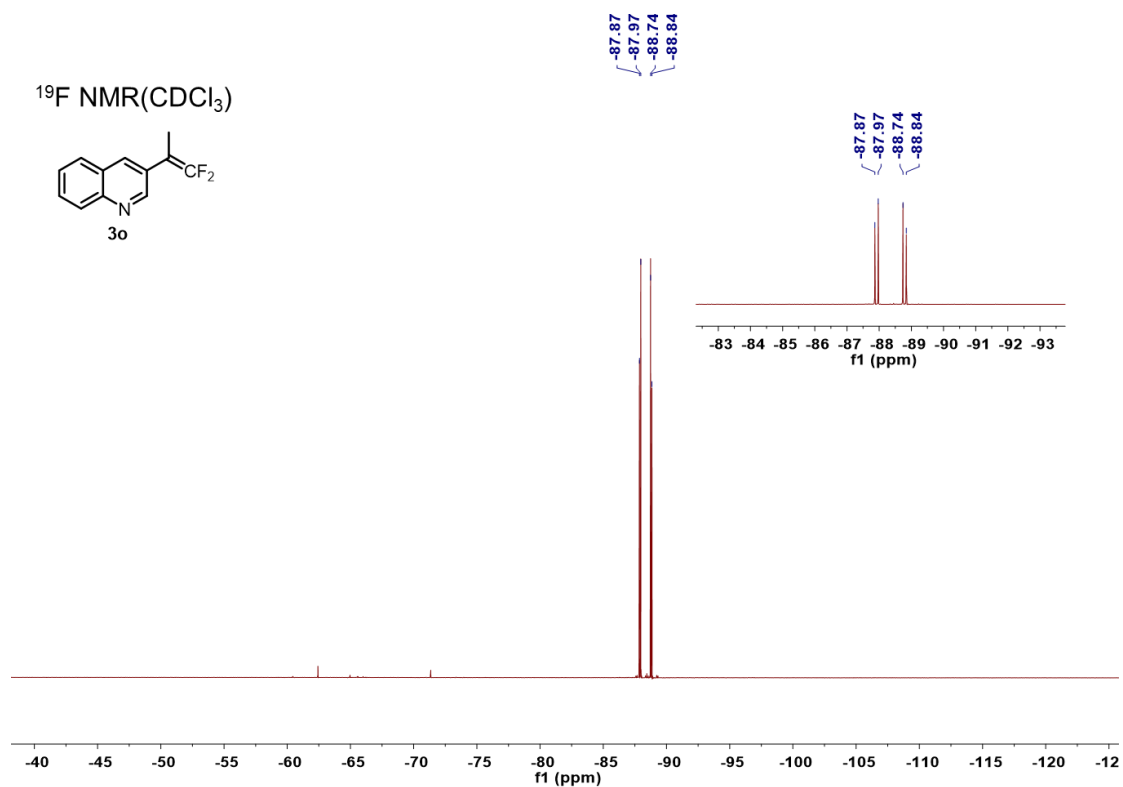

Supplementary Figure 100. <sup>19</sup>F NMR Spectrum of 3o.

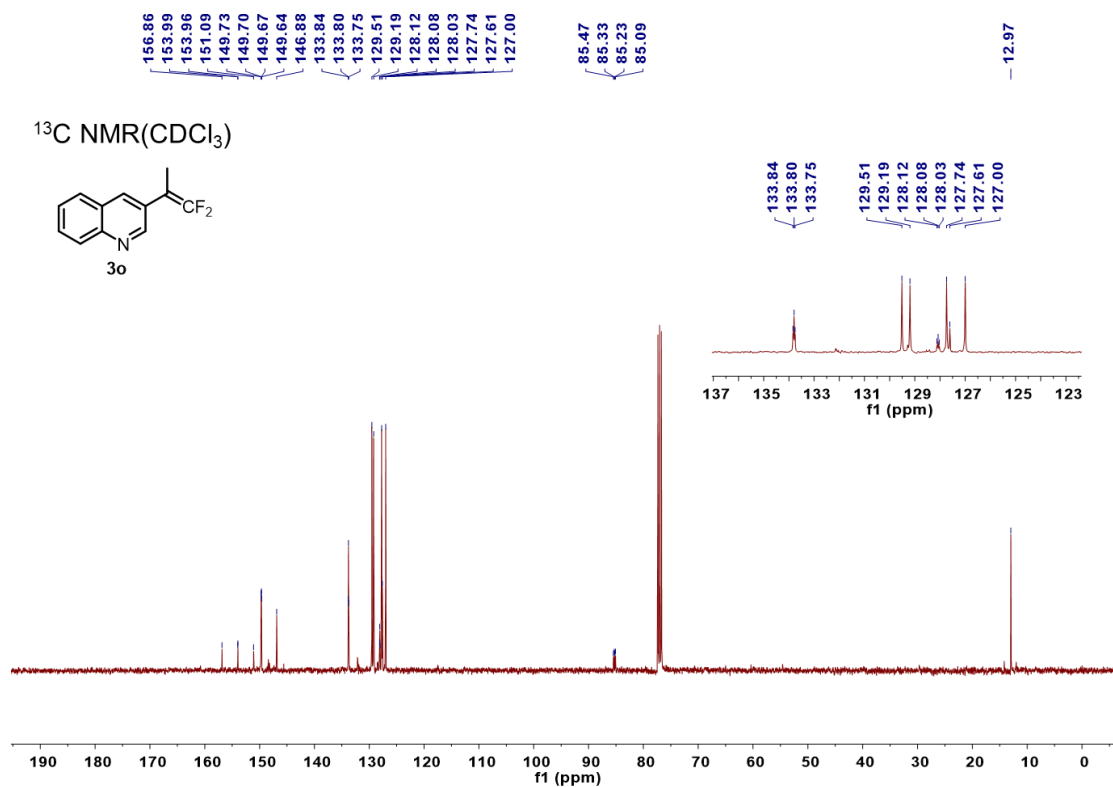

Supplementary Figure 101. <sup>13</sup>C NMR Spectrum of 3o.

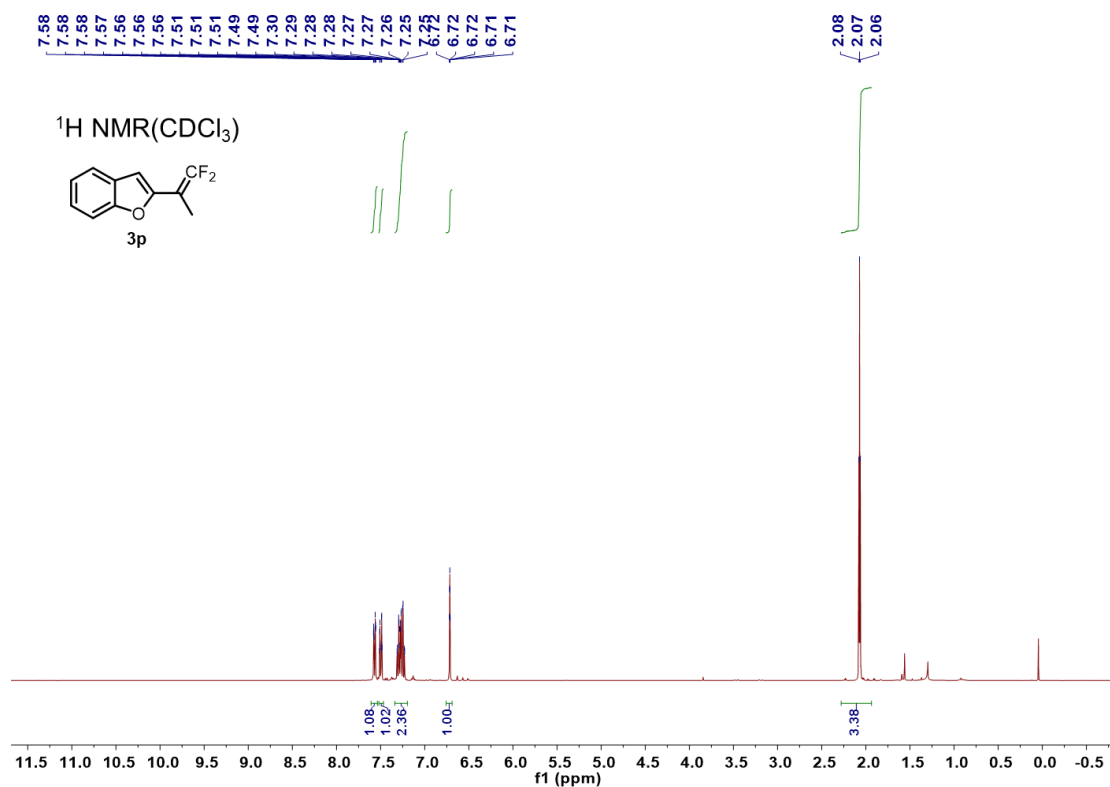

Supplementary Figure 102. <sup>1</sup>H NMR Spectrum of **3p**.

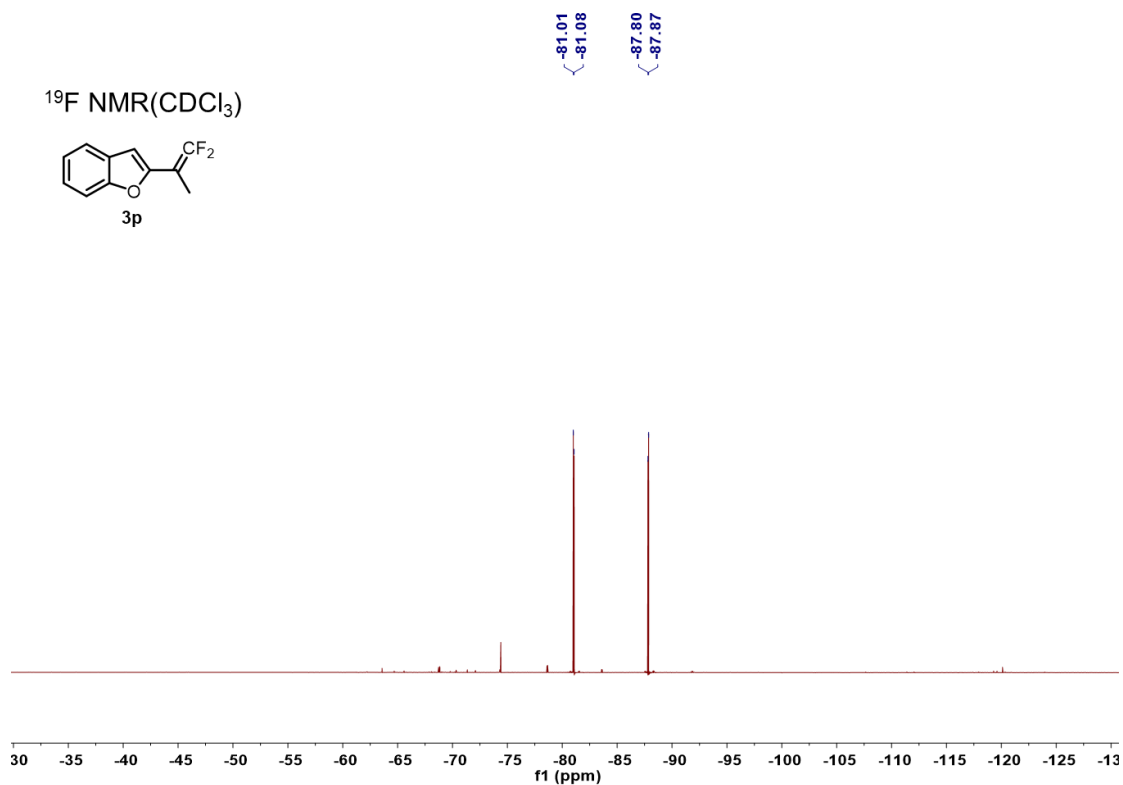

Supplementary Figure 103. <sup>19</sup>F NMR Spectrum of **3p**.

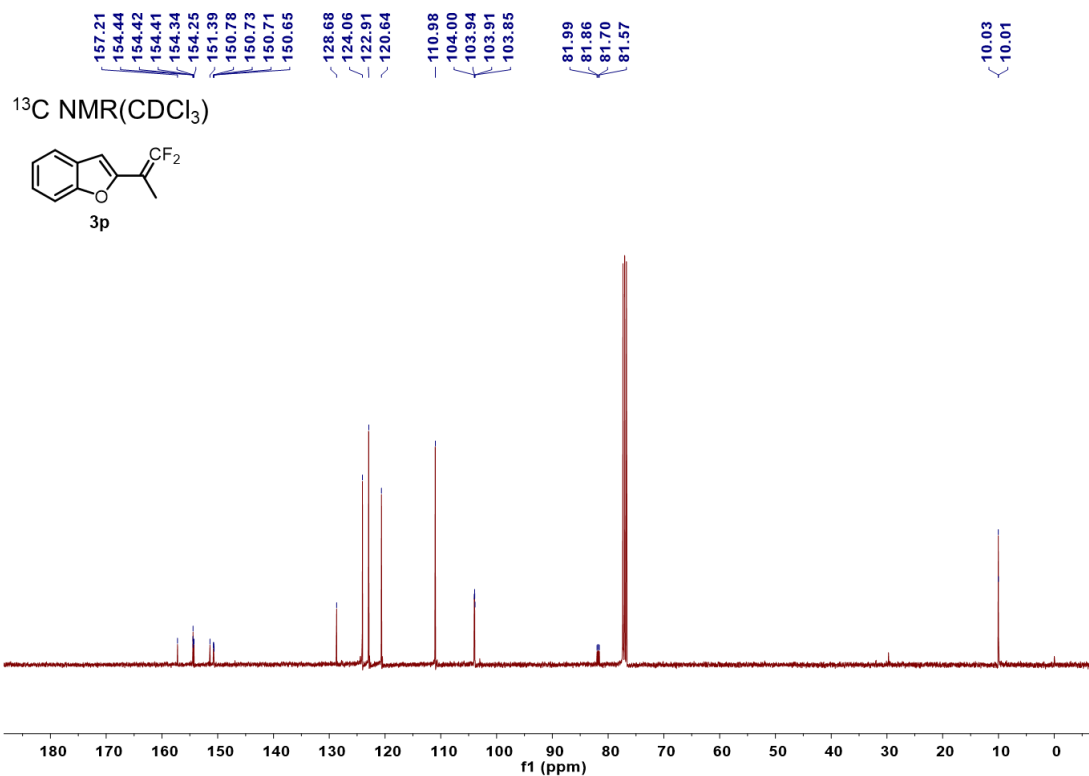

Supplementary Figure 104. <sup>13</sup>C NMR Spectrum of 3p.

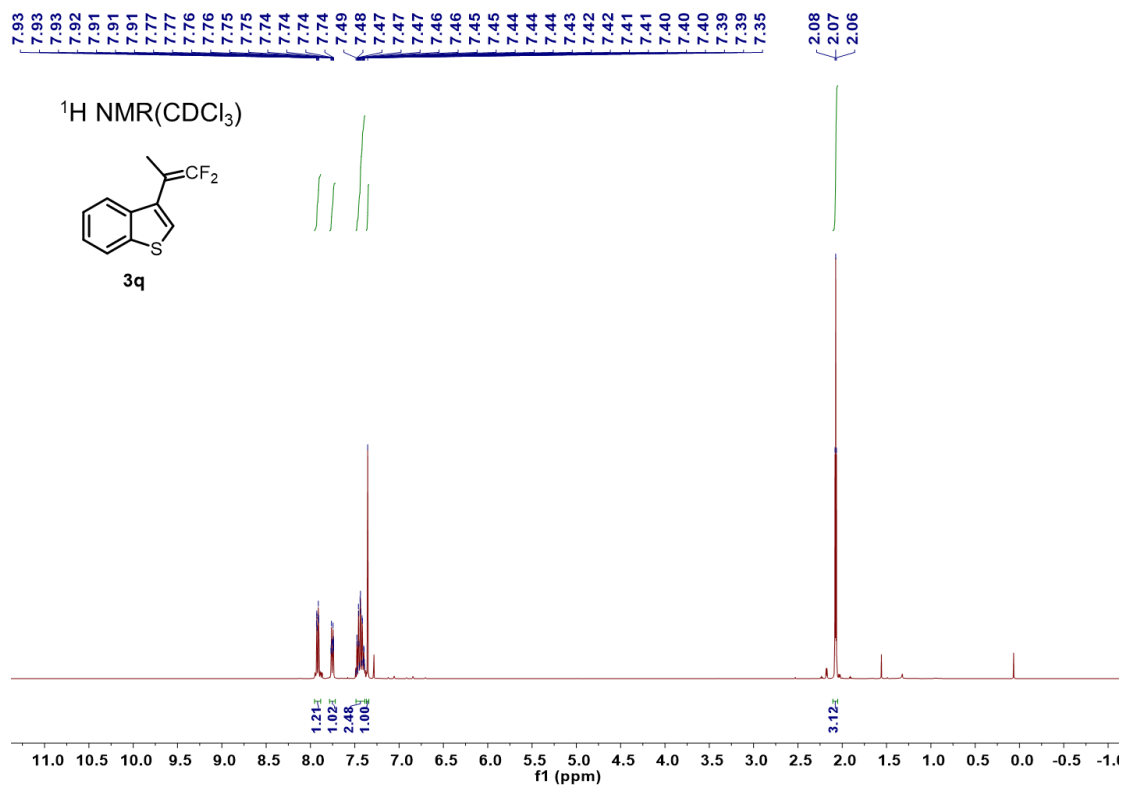

Supplementary Figure 105. <sup>1</sup>H NMR Spectrum of 3q.

<sup>19</sup>F NMR(CDCl<sub>3</sub>)

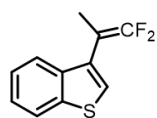

**3q**

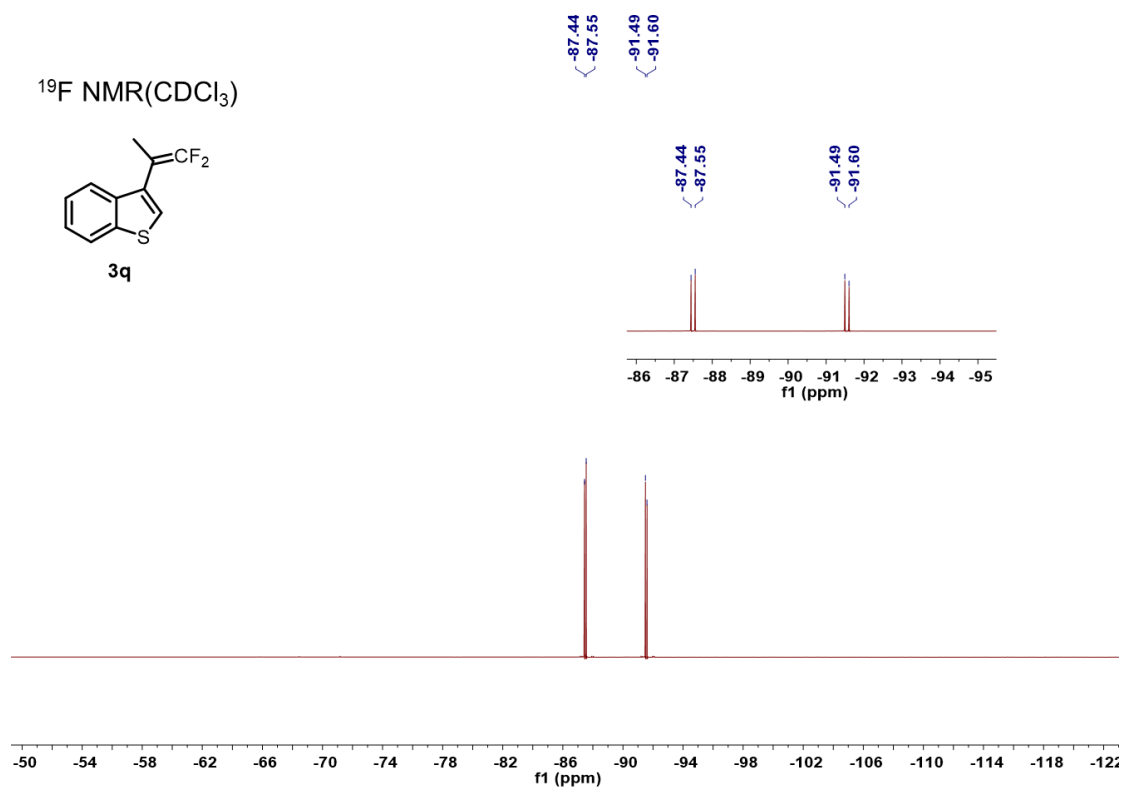

Supplementary Figure 106. <sup>19</sup>F NMR Spectrum of **3q**.

<sup>13</sup>C NMR(CDCl<sub>3</sub>)

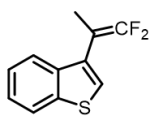

**3q**

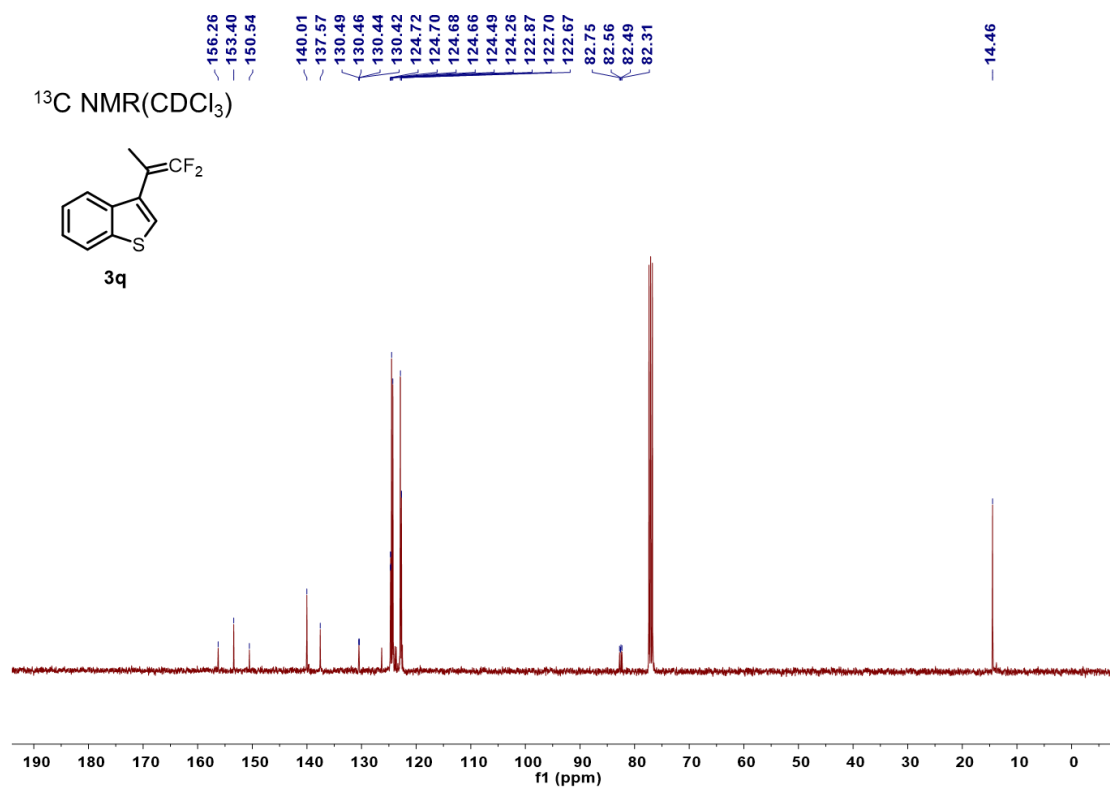

Supplementary Figure 107. <sup>13</sup>C NMR Spectrum of **3q**.



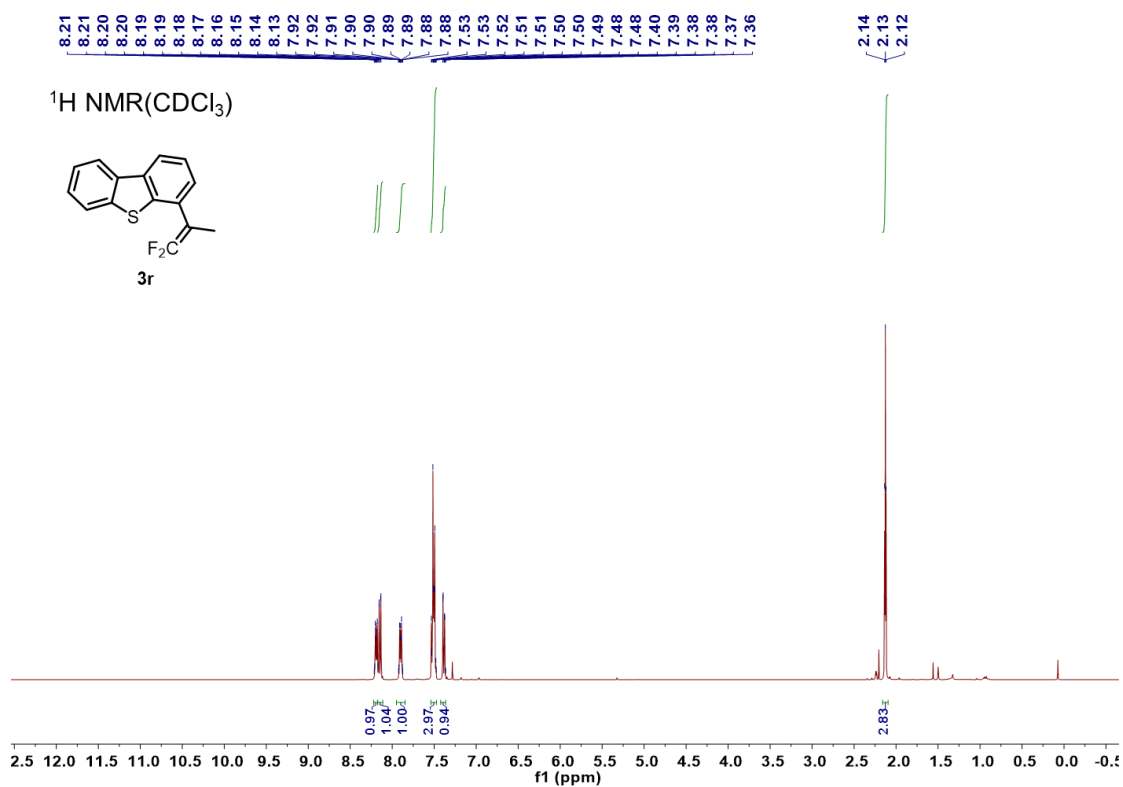

Supplementary Figure 108. <sup>1</sup>H NMR Spectrum of **3r**.

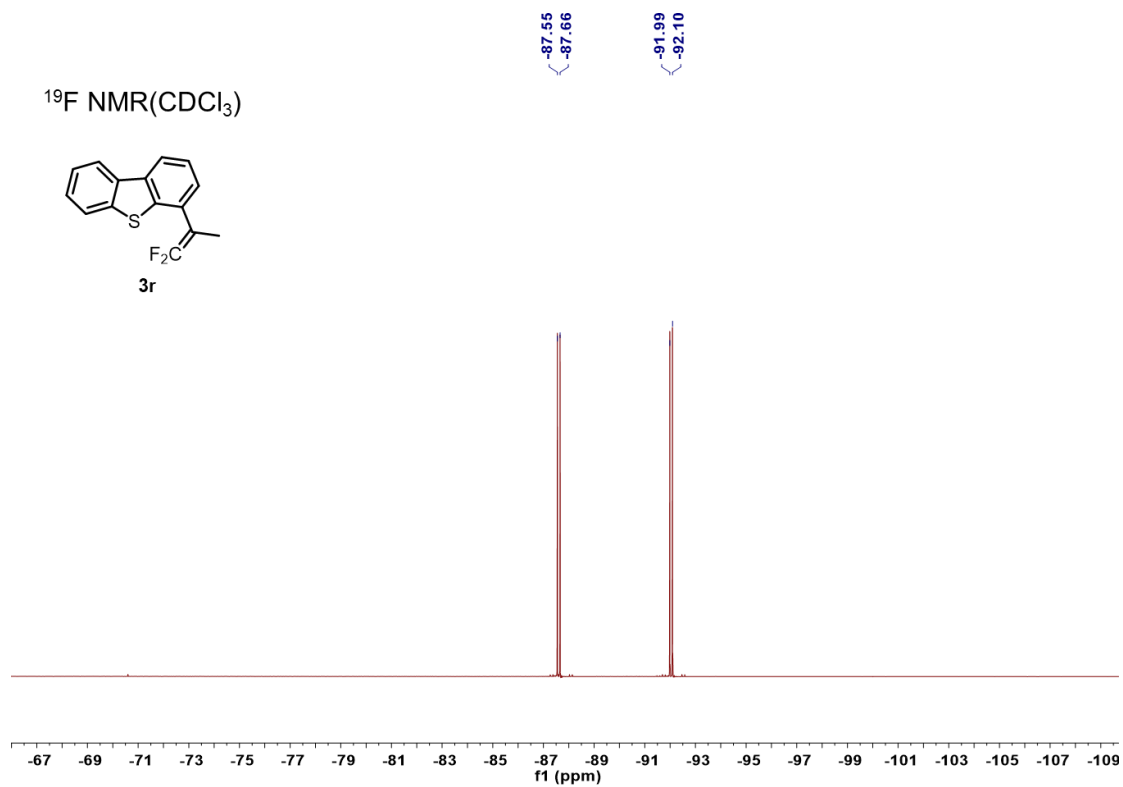

Supplementary Figure 109. <sup>19</sup>F NMR Spectrum of **3r**.

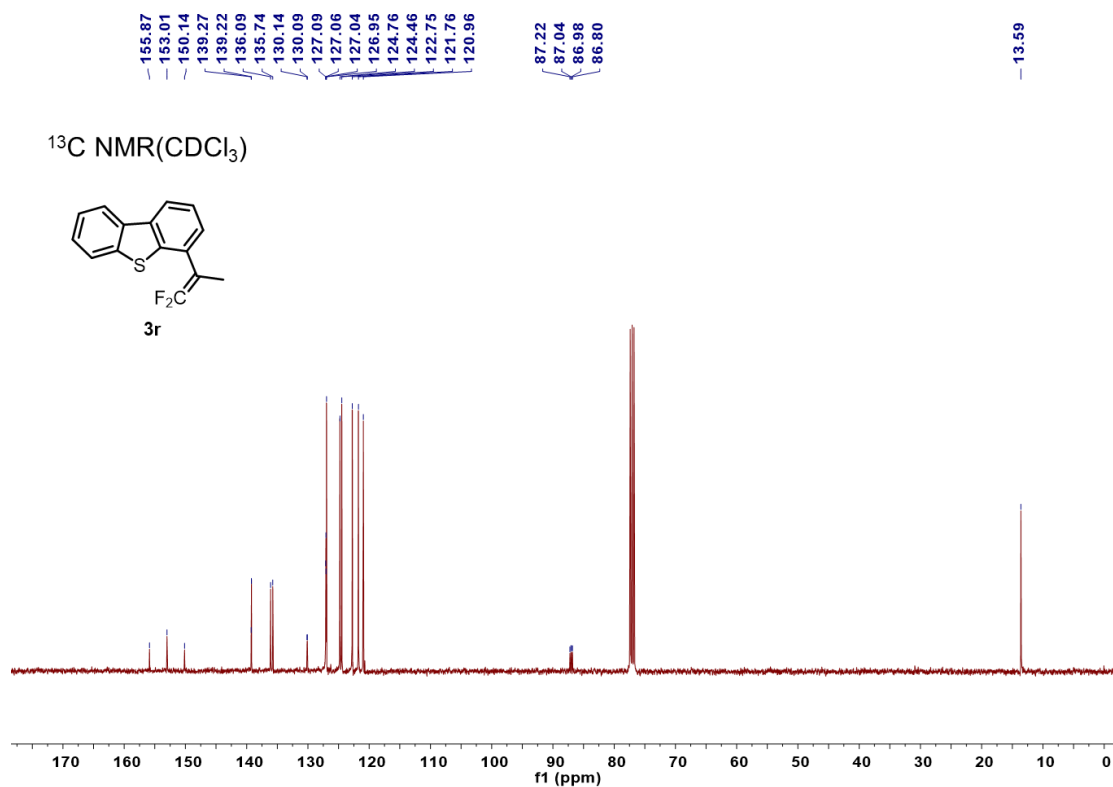

Supplementary Figure 110. <sup>13</sup>C NMR Spectrum of **3r**.

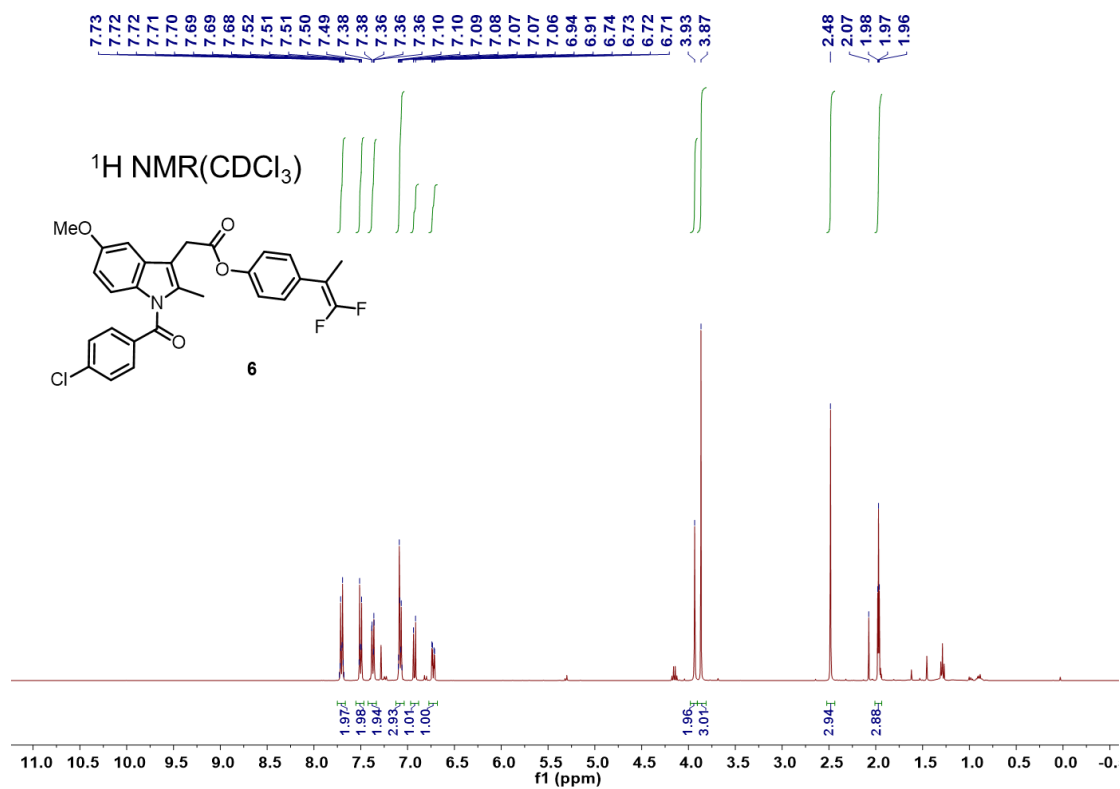

Supplementary Figure 111. <sup>1</sup>H NMR Spectrum of **6**.

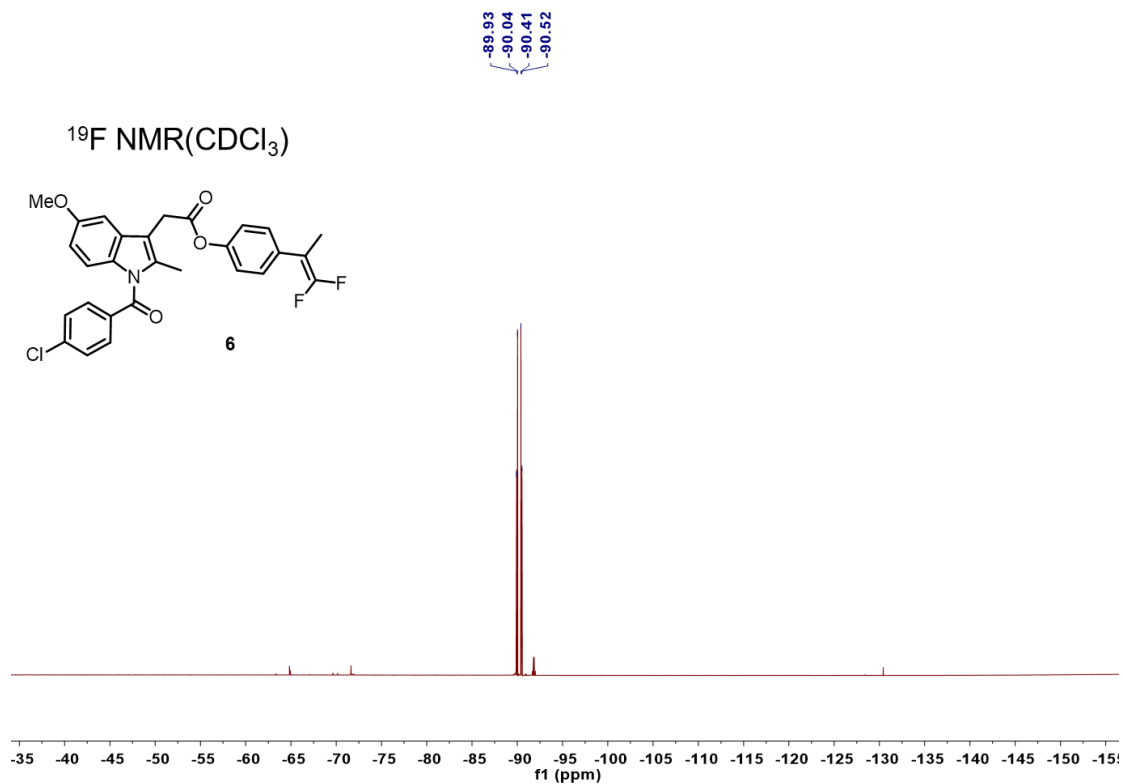

Supplementary Figure 112. <sup>19</sup>F NMR Spectrum of **6**.

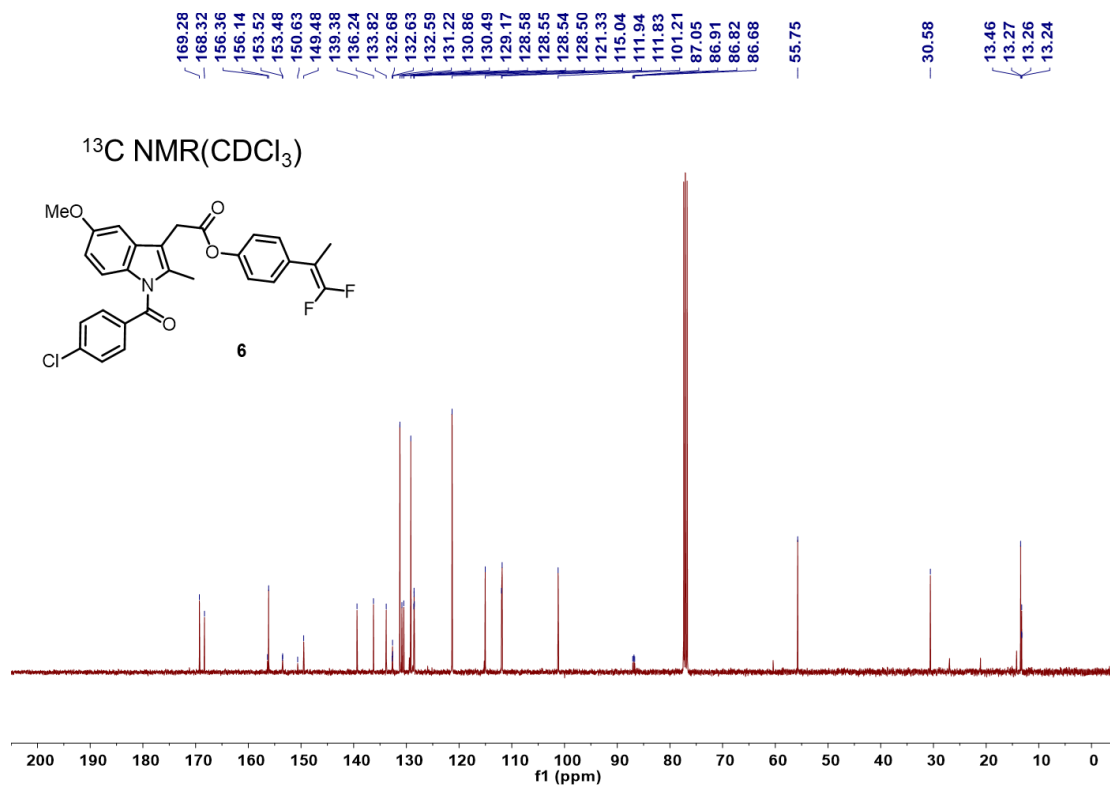

Supplementary Figure 113. <sup>13</sup>C NMR Spectrum of **6**.

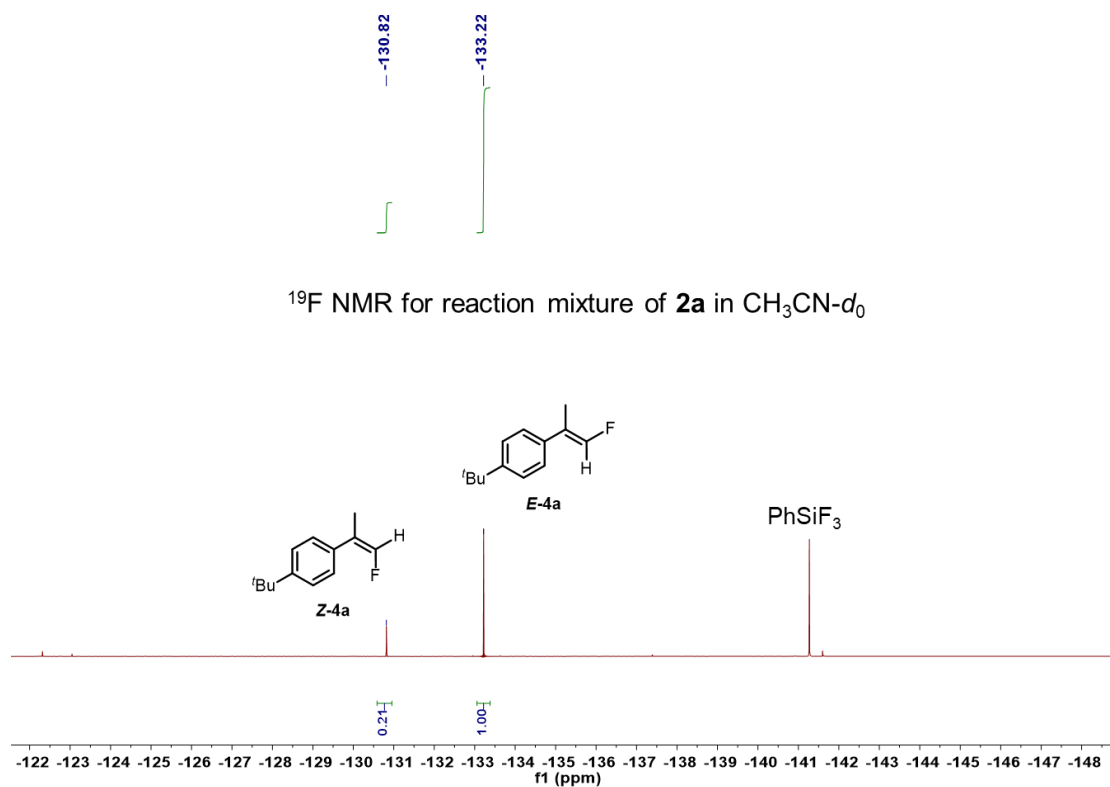

Supplementary Figure 114. <sup>19</sup>F NMR Spectrum for Reaction Mixture of **2a**.

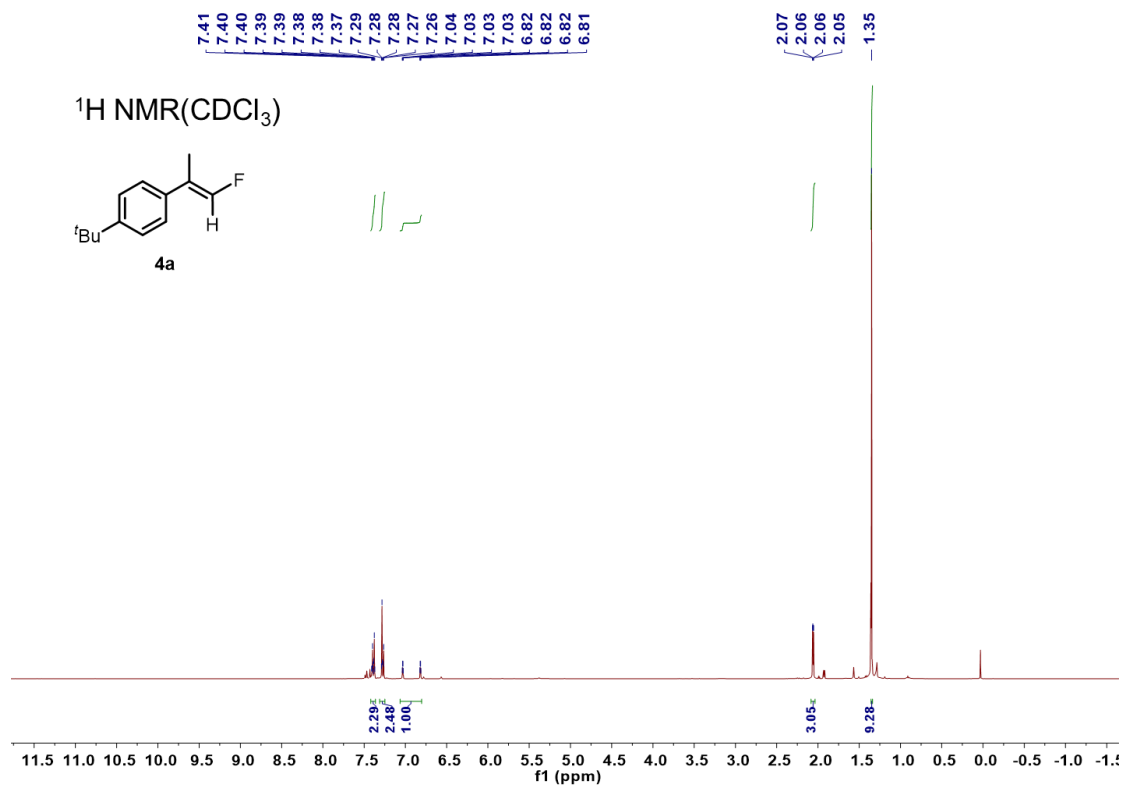

Supplementary Figure 115. <sup>1</sup>H NMR Spectrum of **4a**.

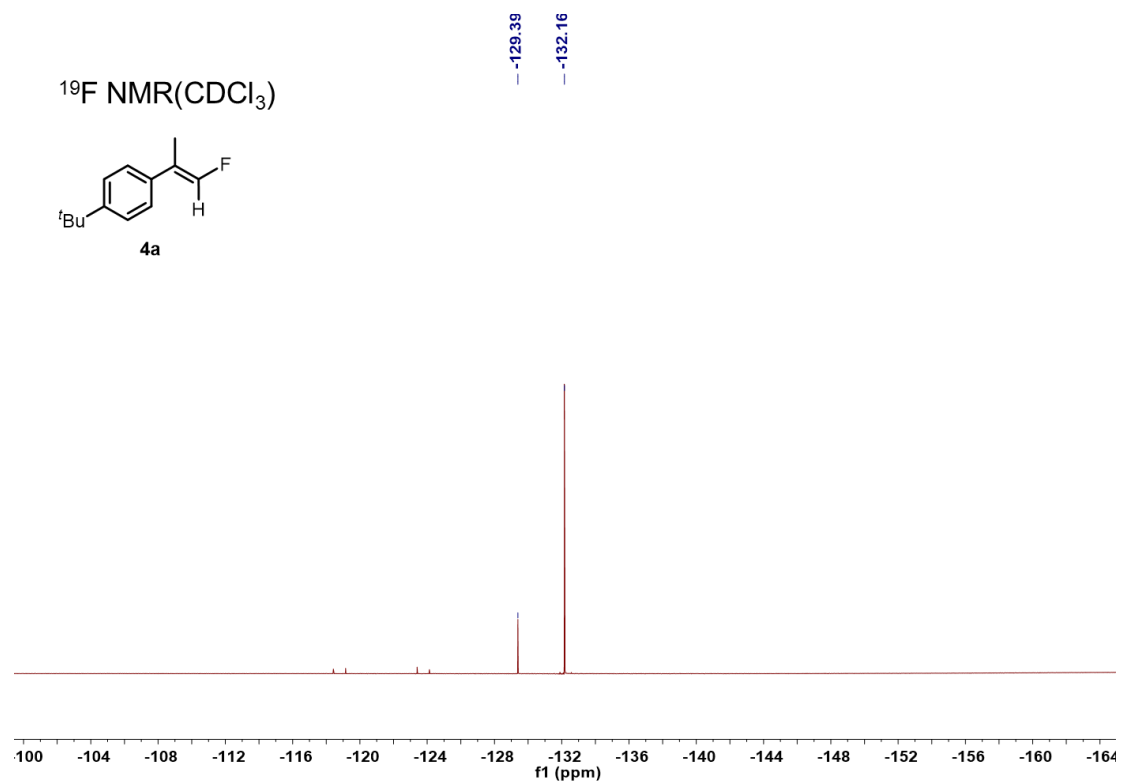

Supplementary Figure 116.  $^{19}\text{F}$  NMR Spectrum of **4a**.

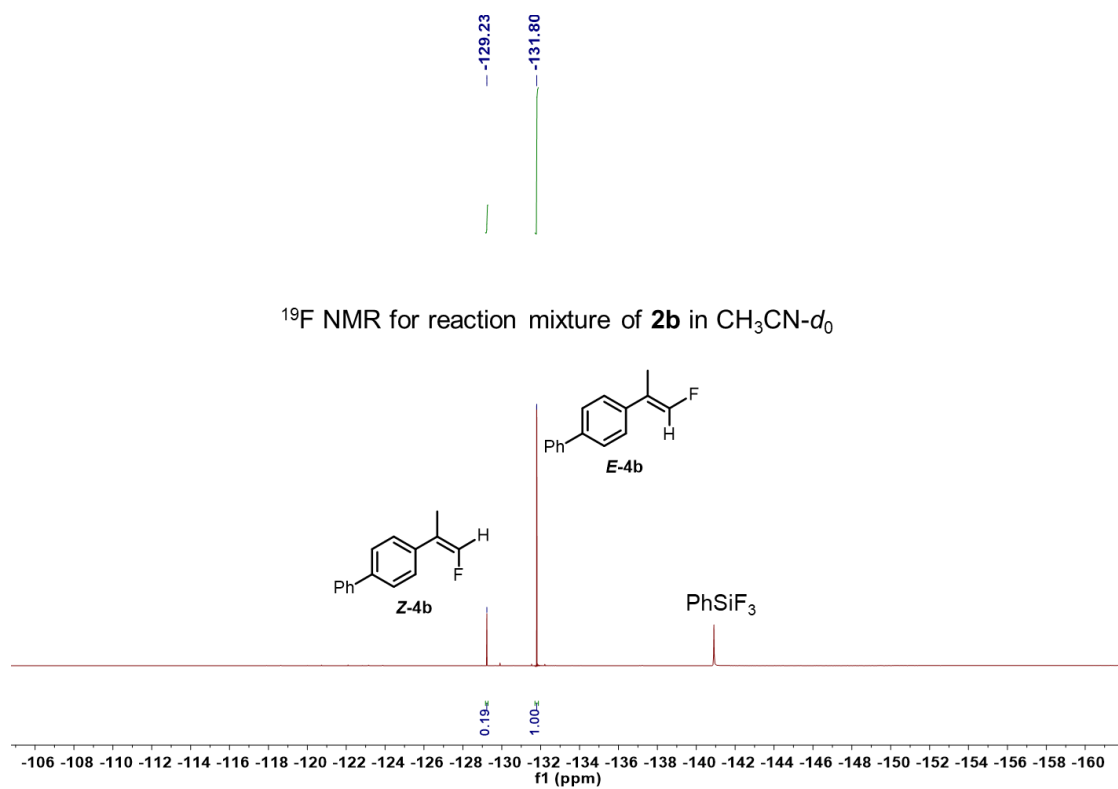

Supplementary Figure 117.  $^{19}\text{F}$  NMR Spectrum for Reaction Mixture of **2b**.

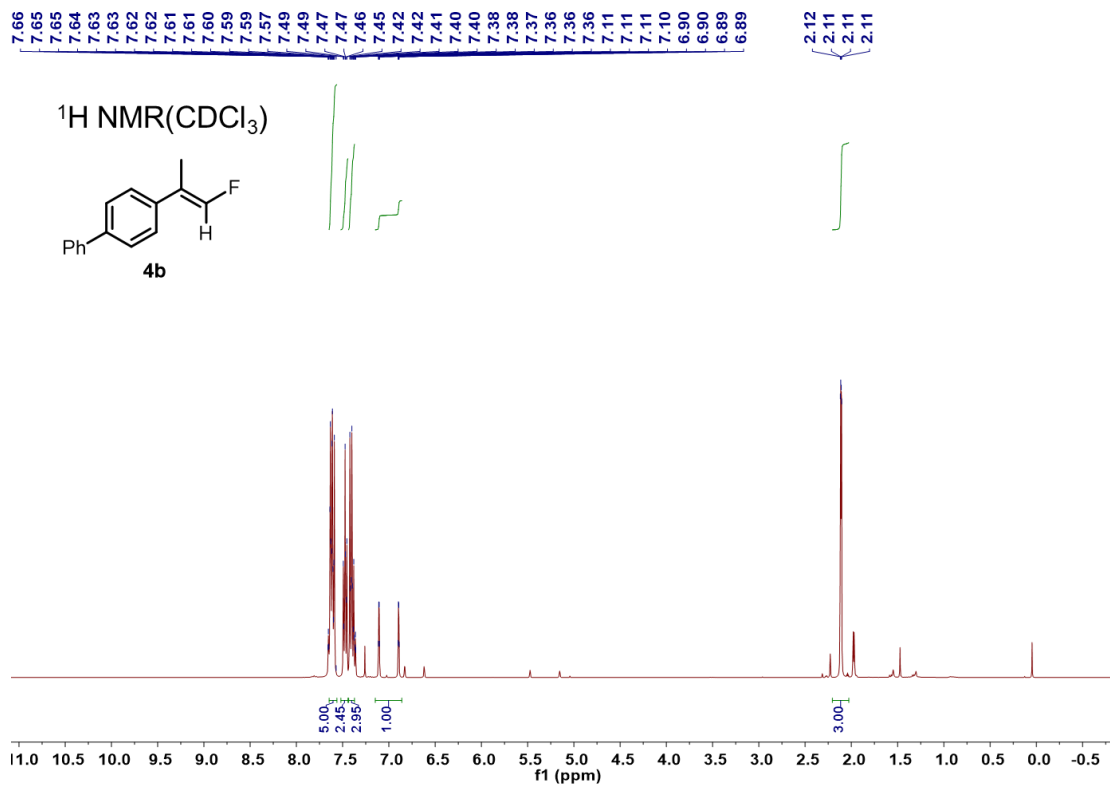

Supplementary Figure 118. <sup>1</sup>H NMR Spectrum of **4b**.

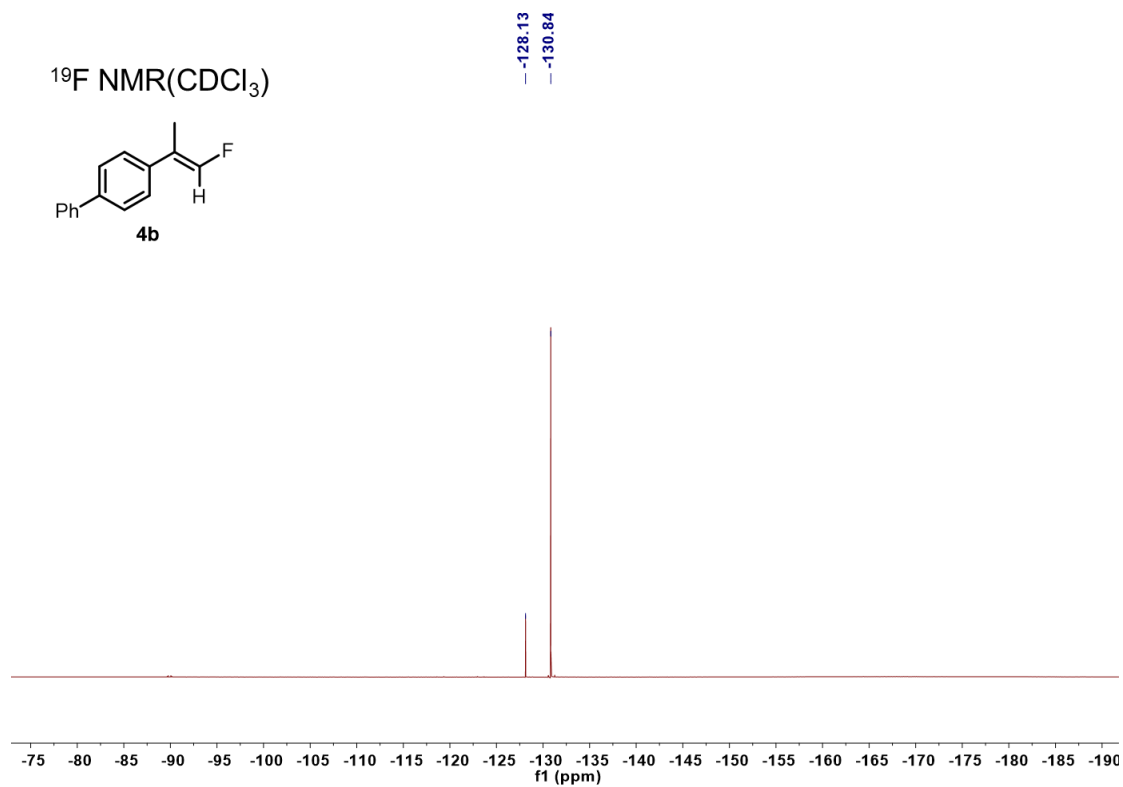

Supplementary Figure 119. <sup>19</sup>F NMR Spectrum of **4b**.

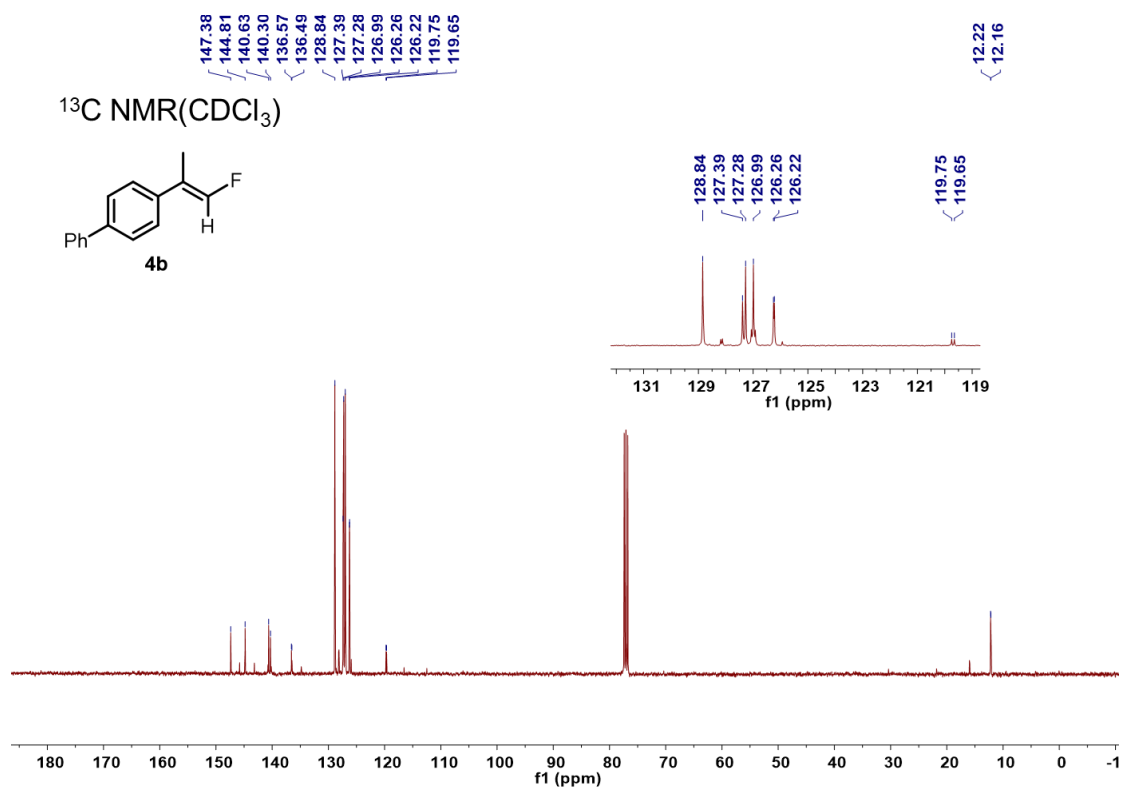

Supplementary Figure 120. <sup>13</sup>C NMR Spectrum of **4b**.

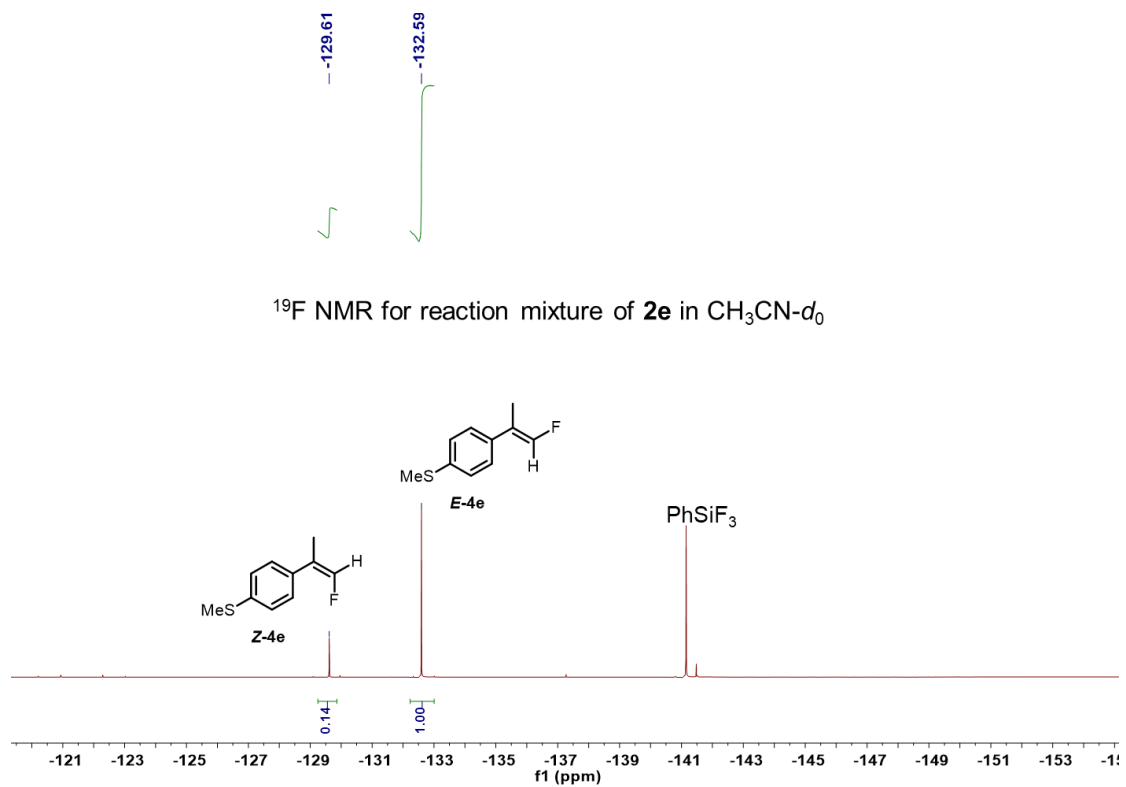

Supplementary Figure 121. <sup>19</sup>F NMR Spectrum for Reaction Mixture of **2e**.

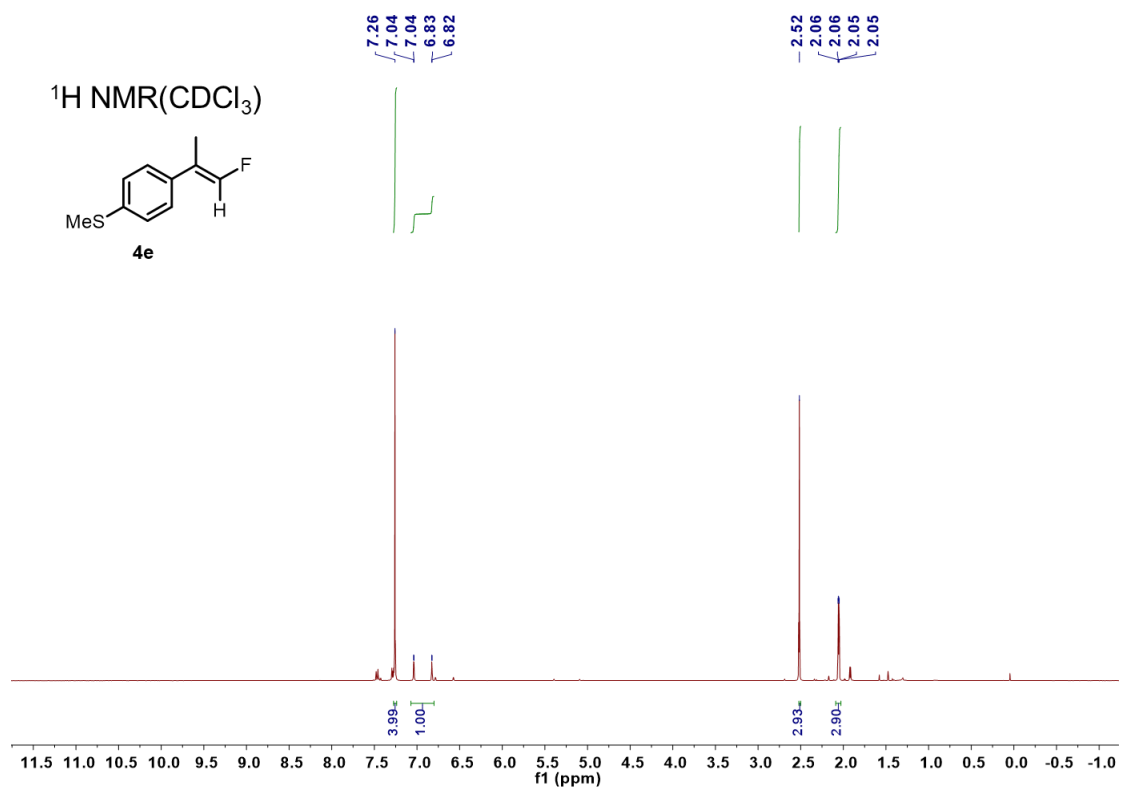

Supplementary Figure 122. <sup>1</sup>H NMR Spectrum of **4e**.

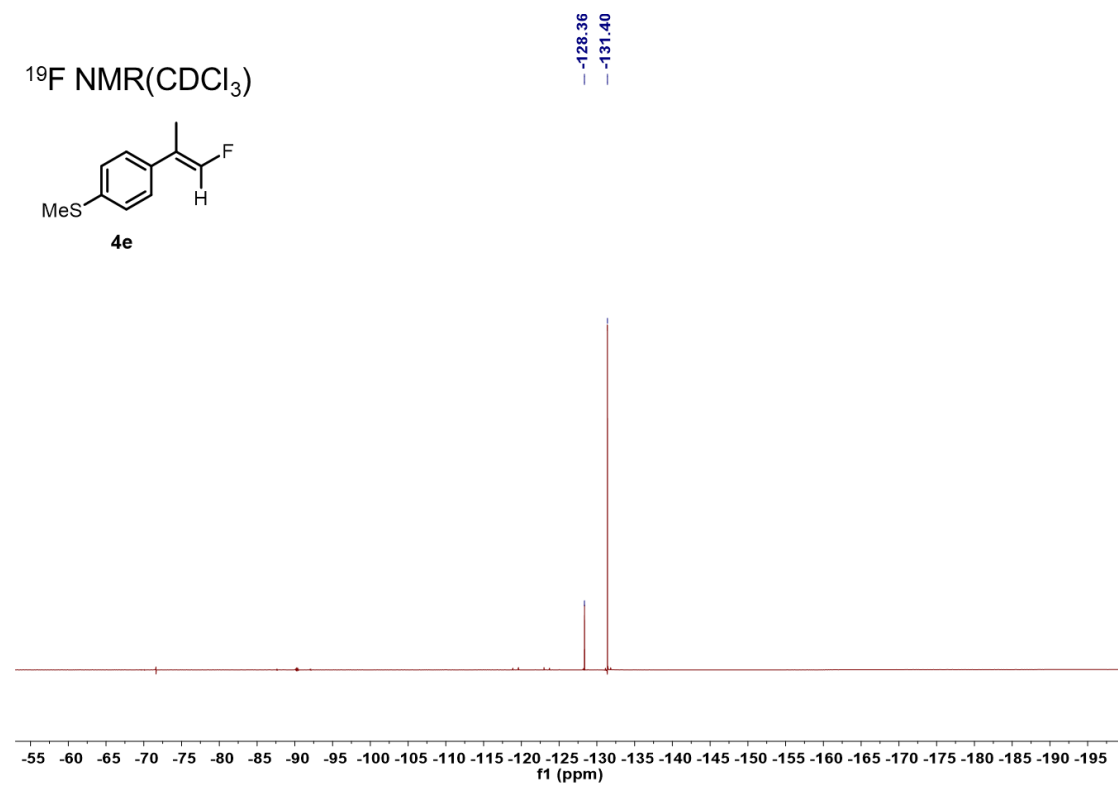

Supplementary Figure 123. <sup>19</sup>F NMR Spectrum of **4e**.



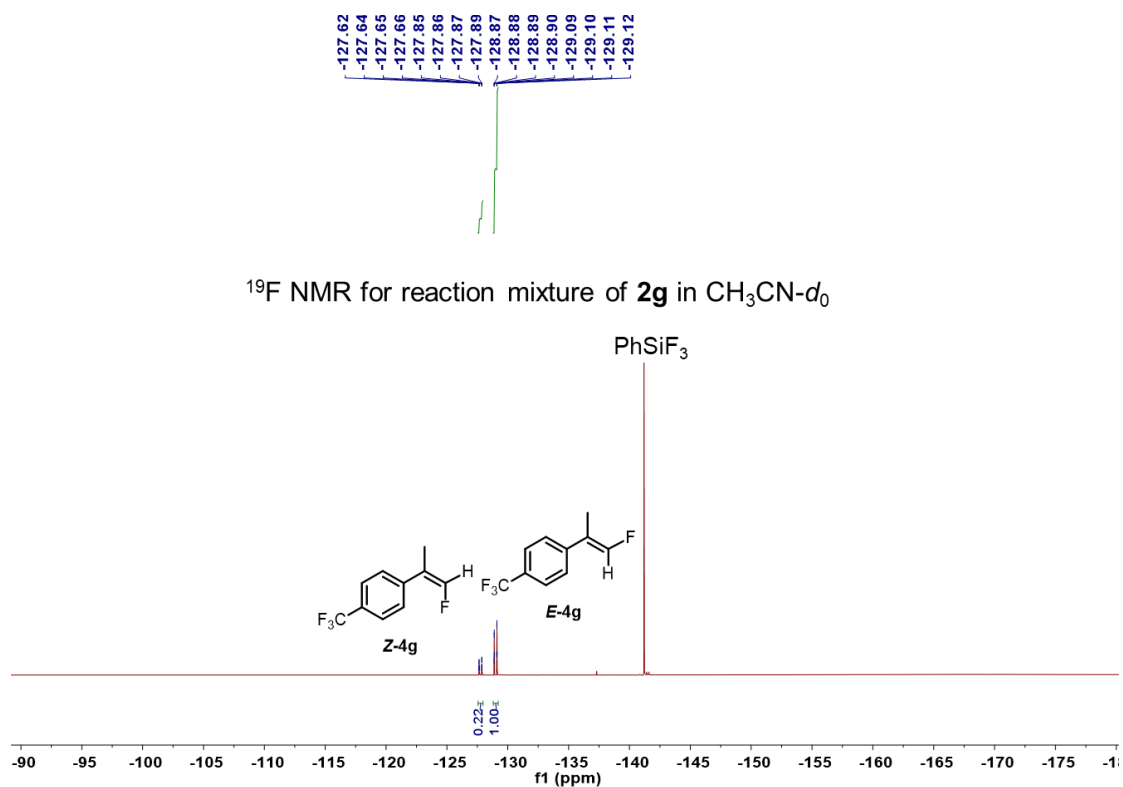

Supplementary Figure 124. <sup>19</sup>F NMR Spectrum for Reaction Mixture of **2g**.

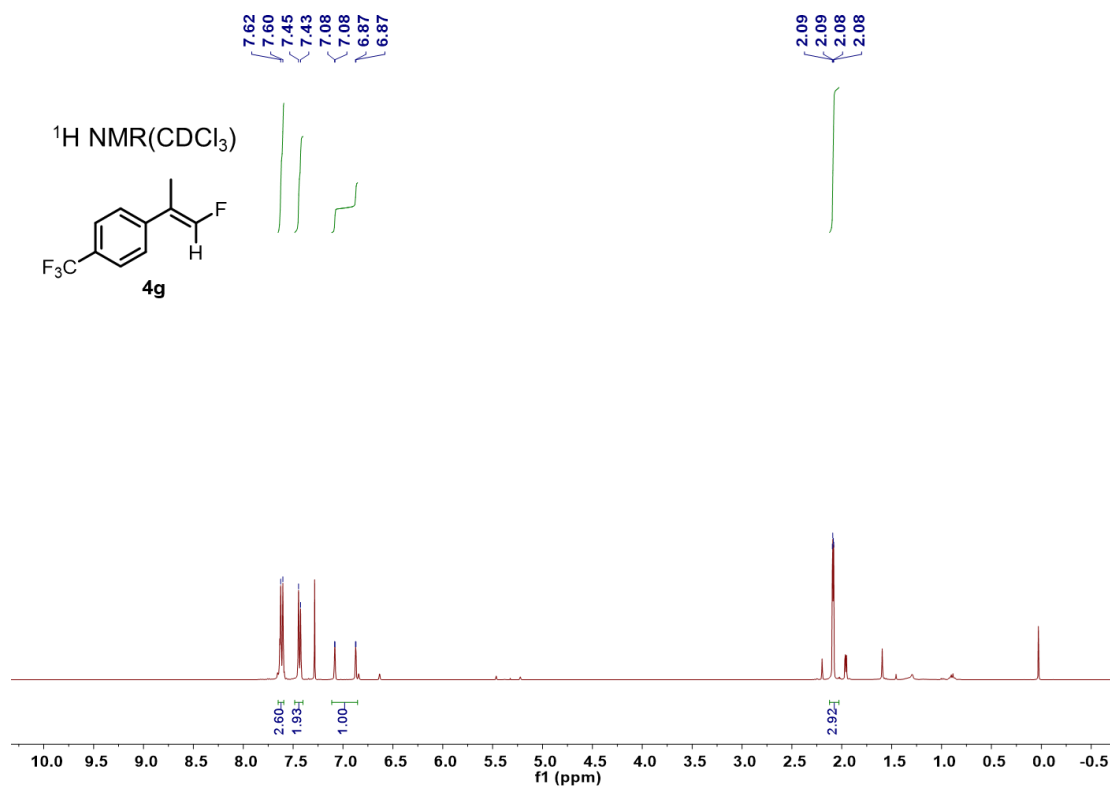

Supplementary Figure 125. <sup>1</sup>H NMR Spectrum of **4g**.

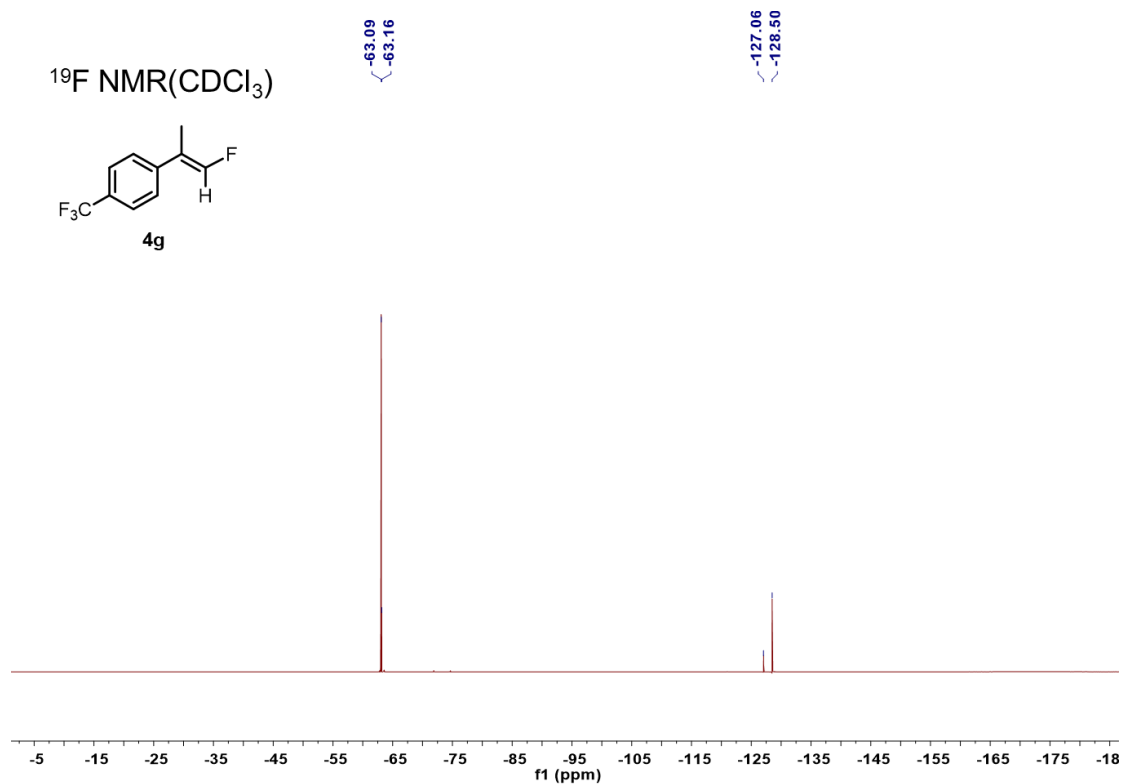

Supplementary Figure 126. <sup>19</sup>F NMR Spectrum of **4g**.

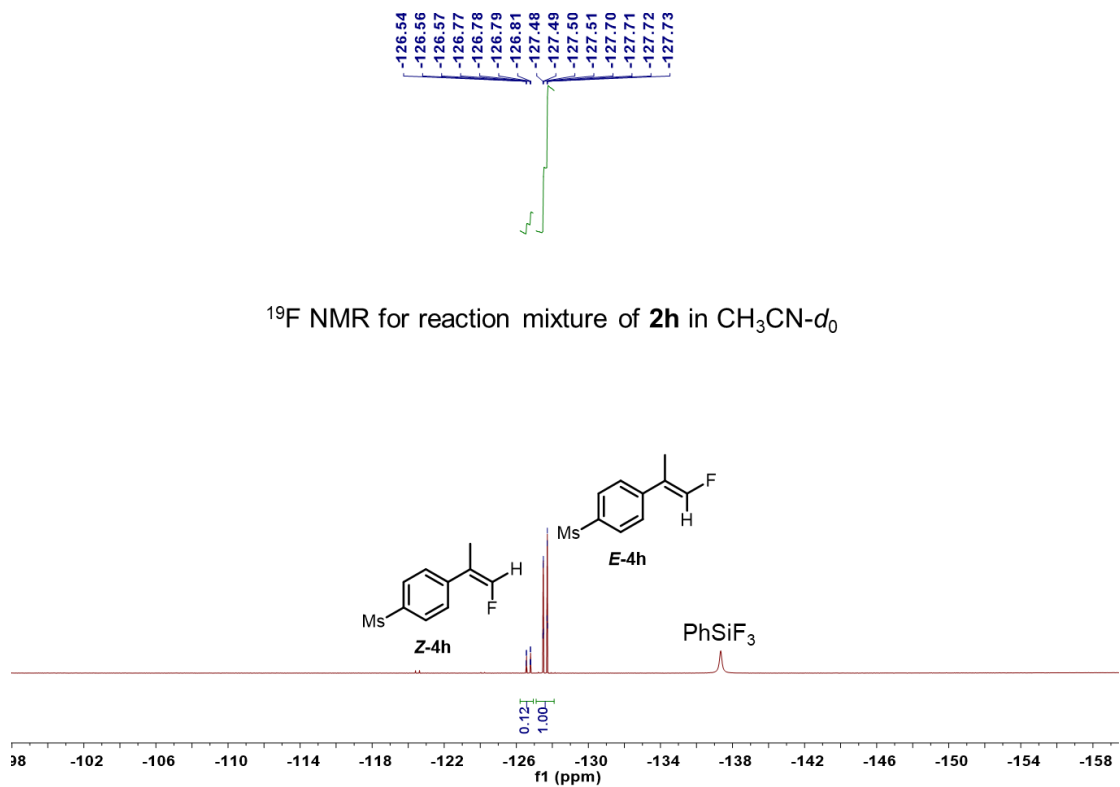

Supplementary Figure 127. <sup>19</sup>F NMR Spectrum for Reaction Mixture of **2h**.

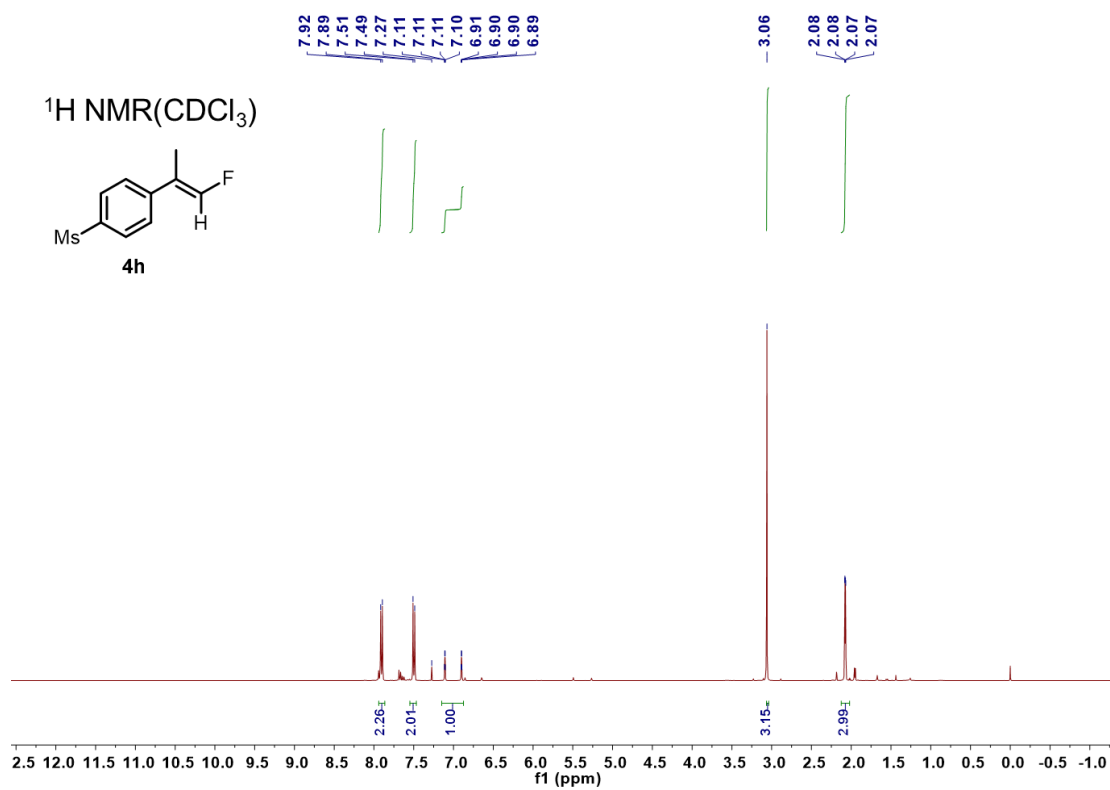

Supplementary Figure 128. <sup>1</sup>H NMR Spectrum of **4h**.

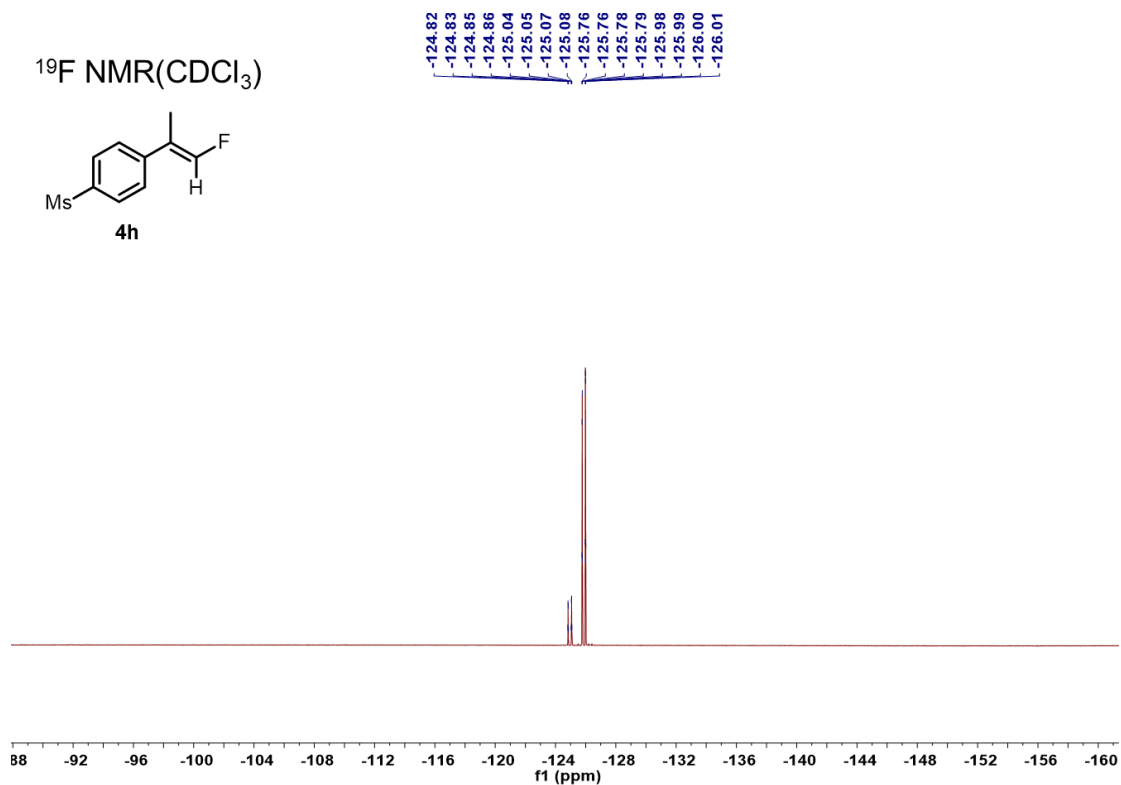

Supplementary Figure 129. <sup>19</sup>F NMR Spectrum of **4h**.

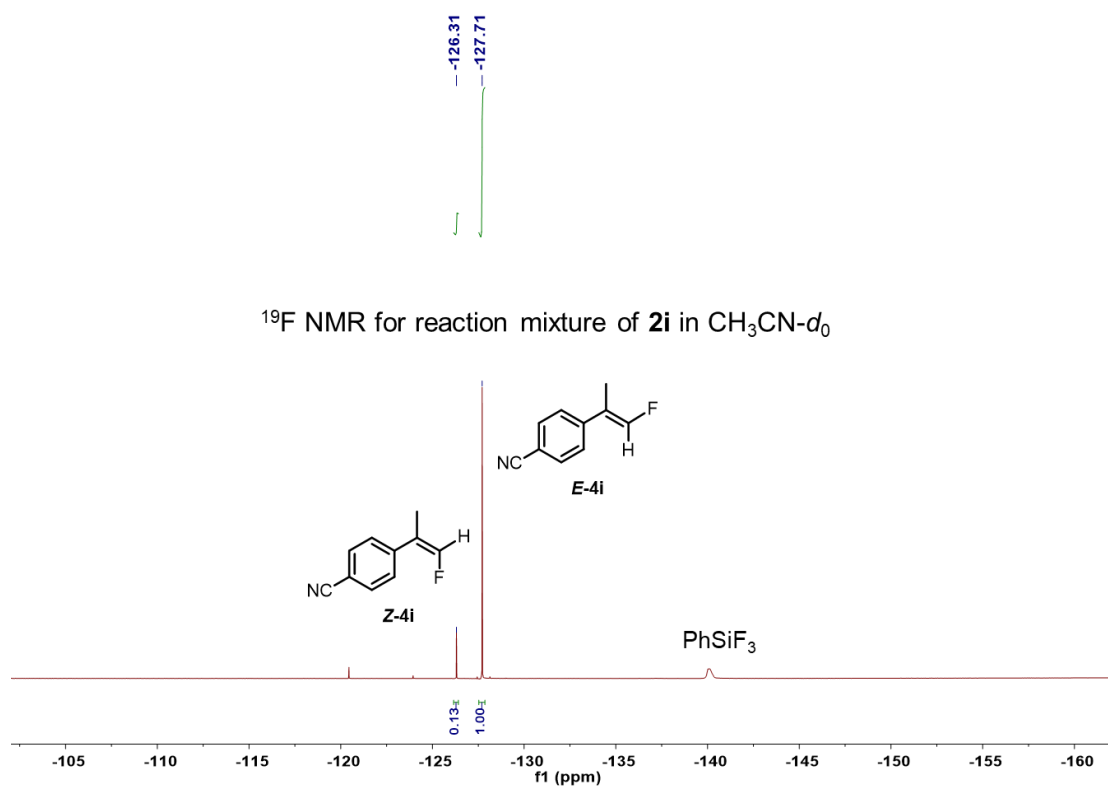

Supplementary Figure 130. <sup>19</sup>F NMR Spectrum for Reaction Mixture of **2i**.

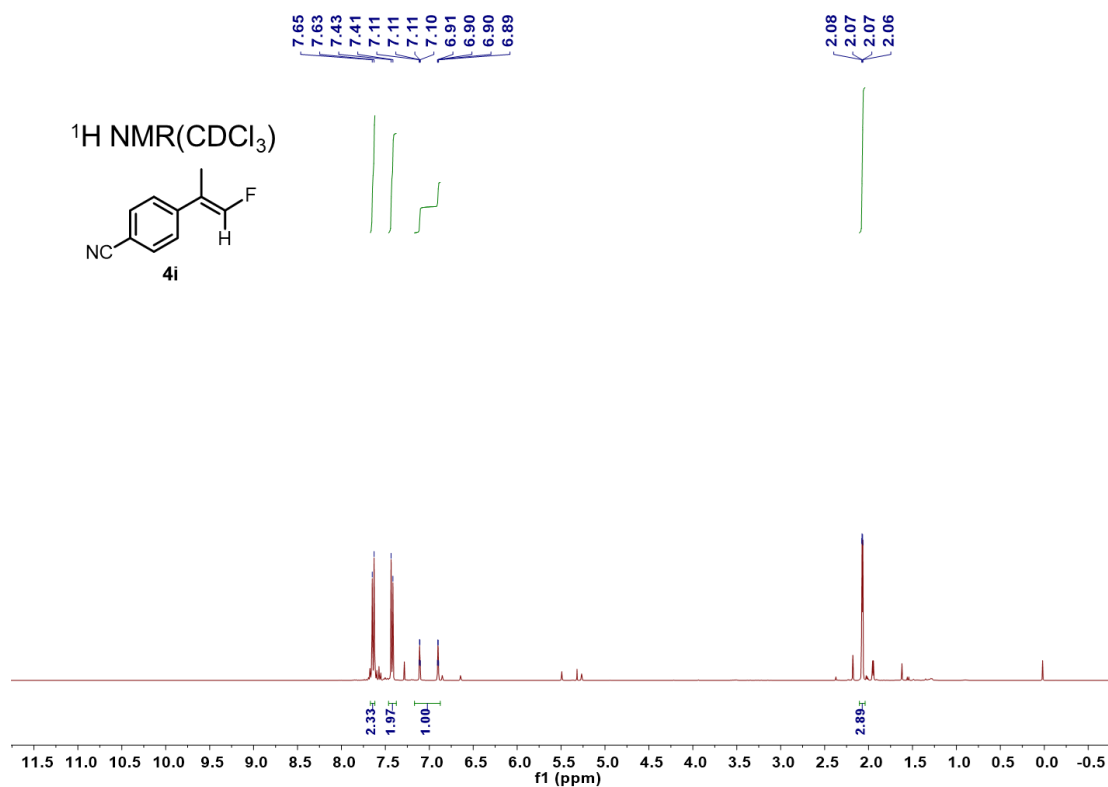

Supplementary Figure 131. <sup>1</sup>H NMR Spectrum of **4i**.

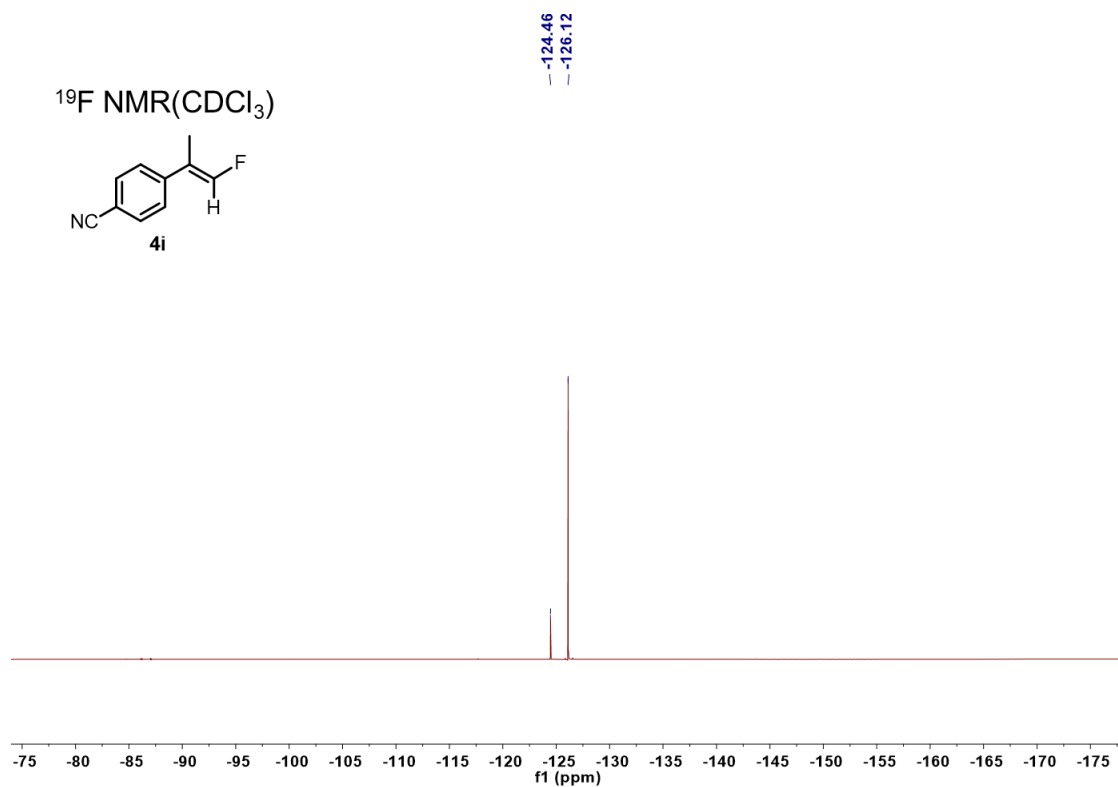

Supplementary Figure 132. <sup>19</sup>F NMR Spectrum of 4i.

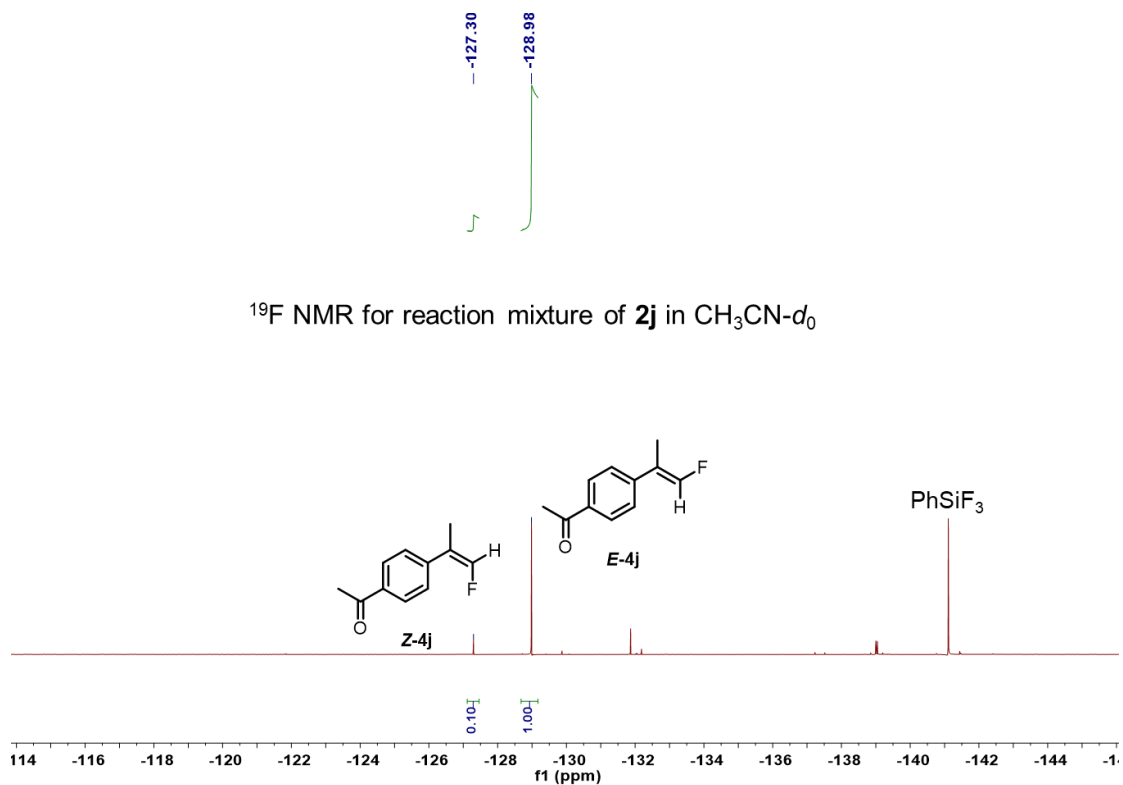

Supplementary Figure 133. <sup>19</sup>F NMR Spectrum for Reaction Mixture of 2j.

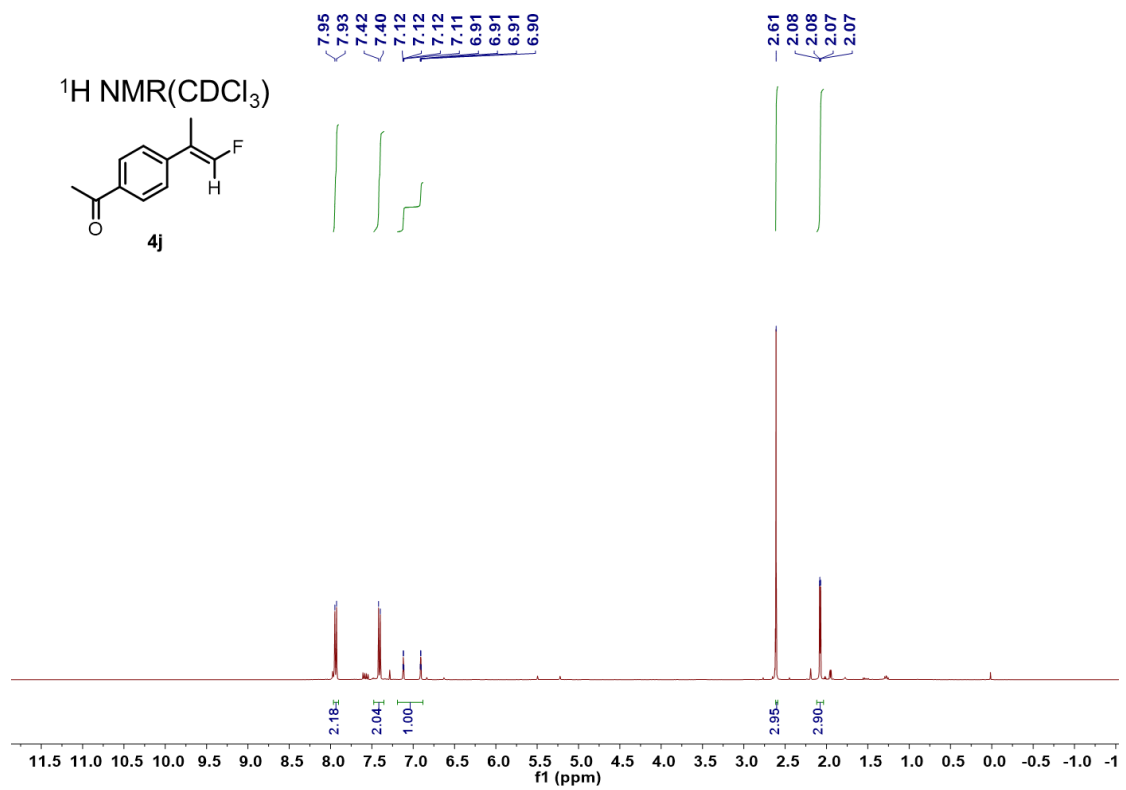

Supplementary Figure 134. <sup>1</sup>H NMR Spectrum of 4j.

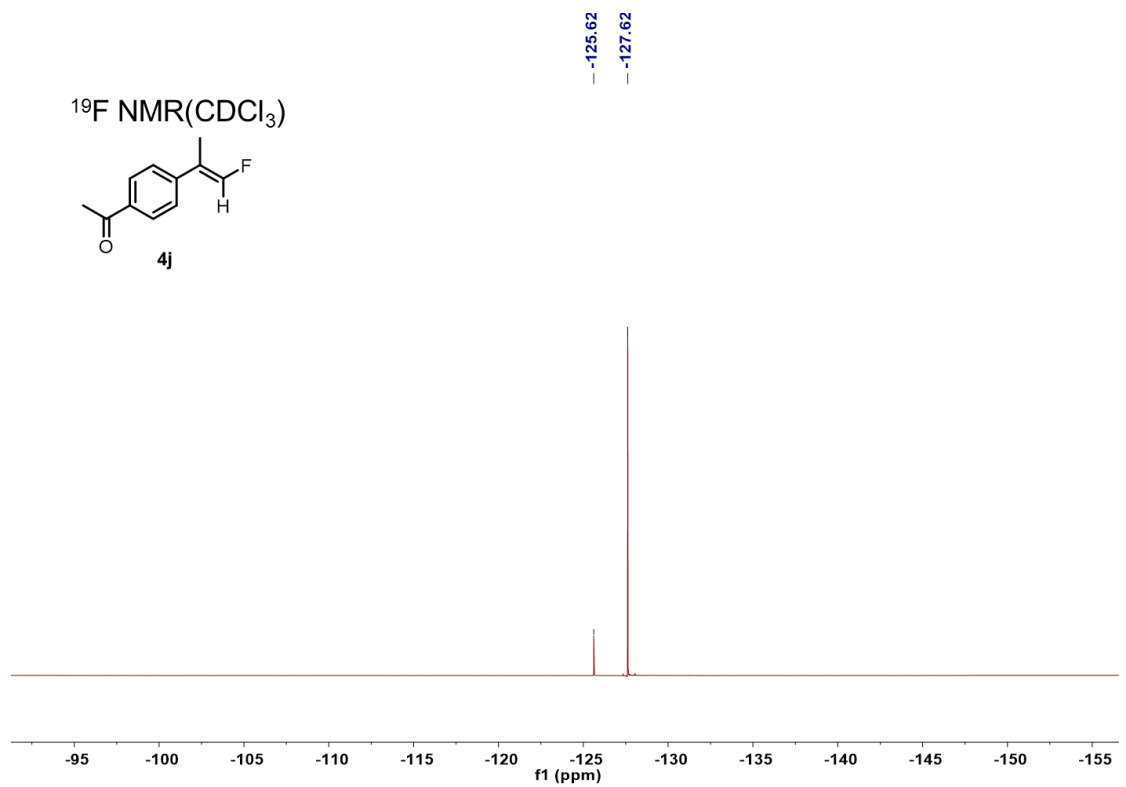

Supplementary Figure 135. <sup>19</sup>F NMR Spectrum of 4j.

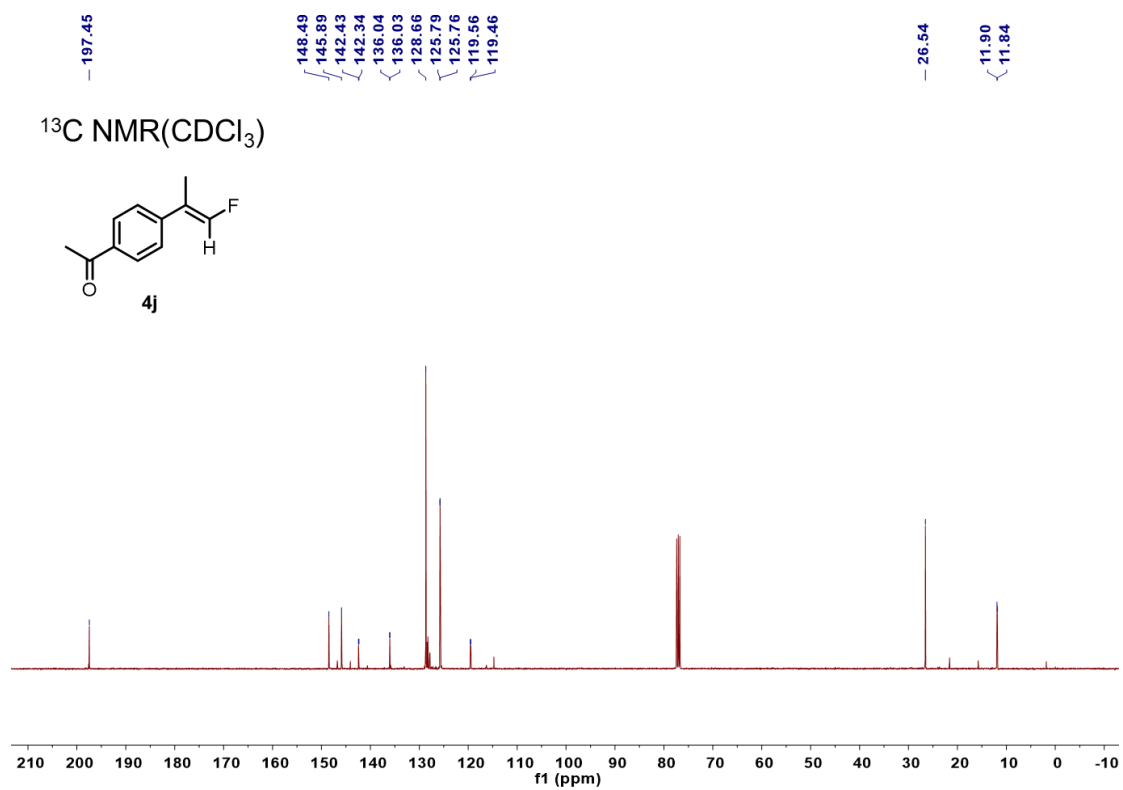

Supplementary Figure 136. <sup>13</sup>C NMR Spectrum of **4j**.

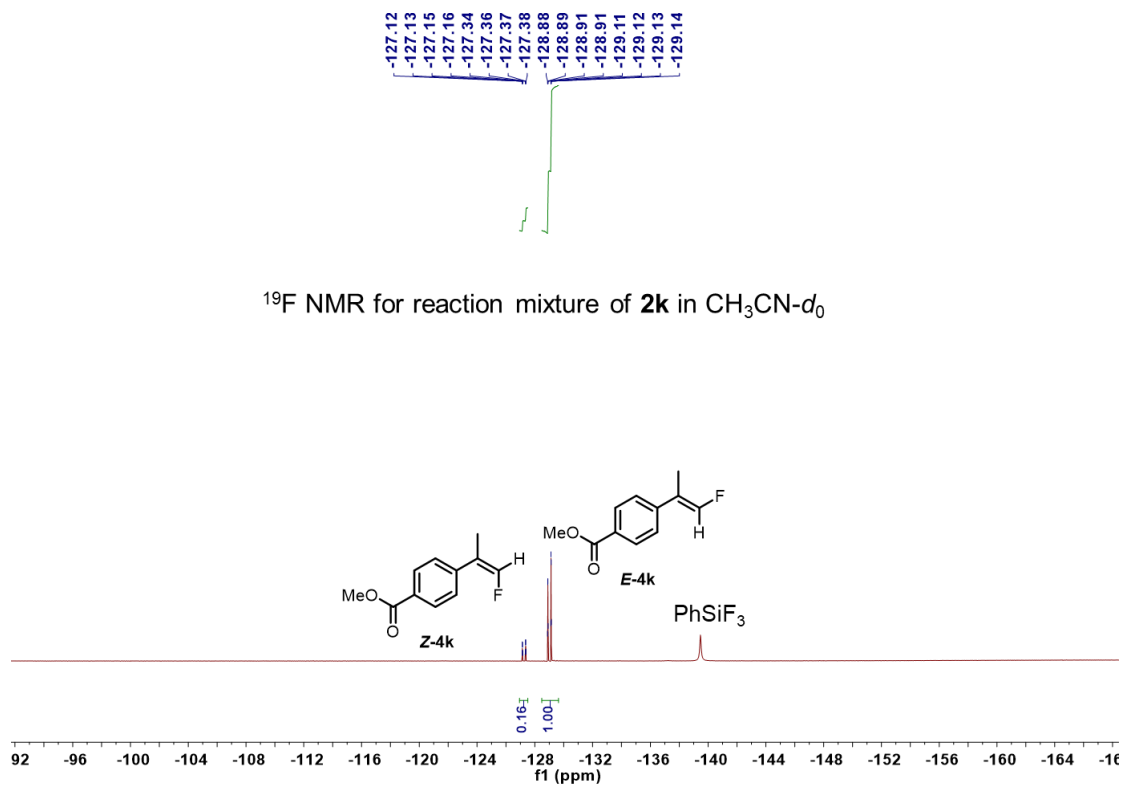

Supplementary Figure 137. <sup>19</sup>F NMR Spectrum for Reaction Mixture of **2k**.

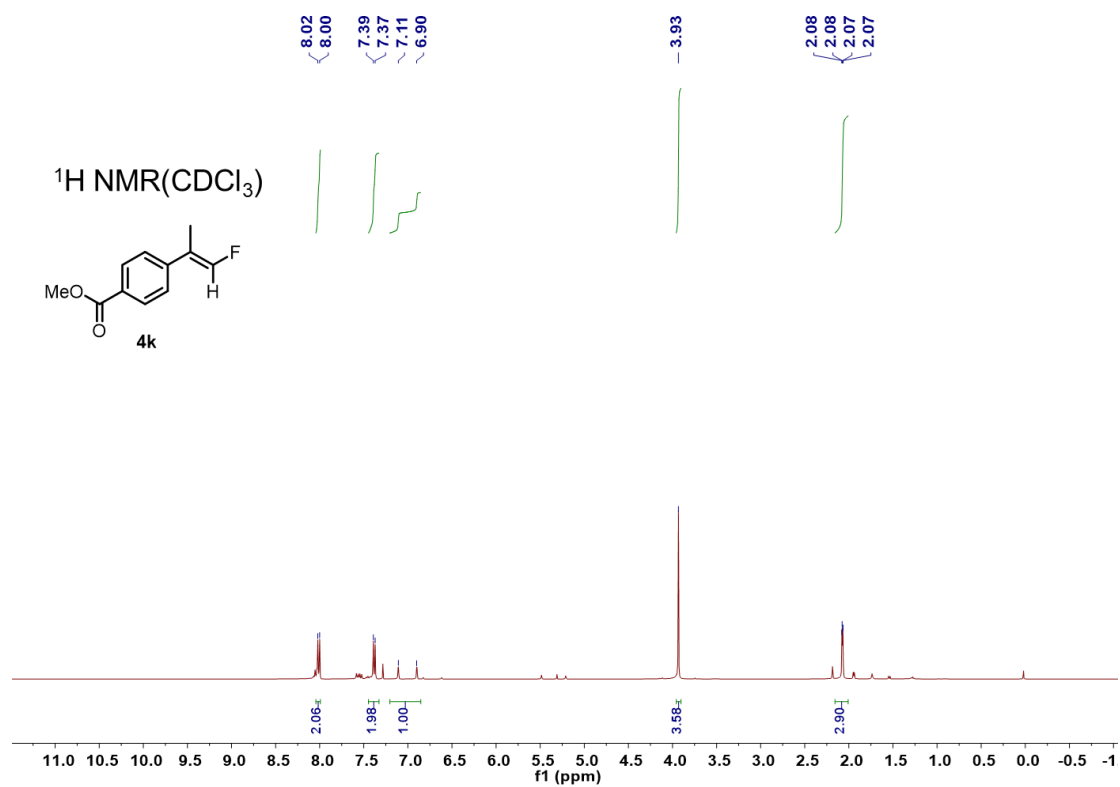

Supplementary Figure 138. <sup>1</sup>H NMR Spectrum of 4k.

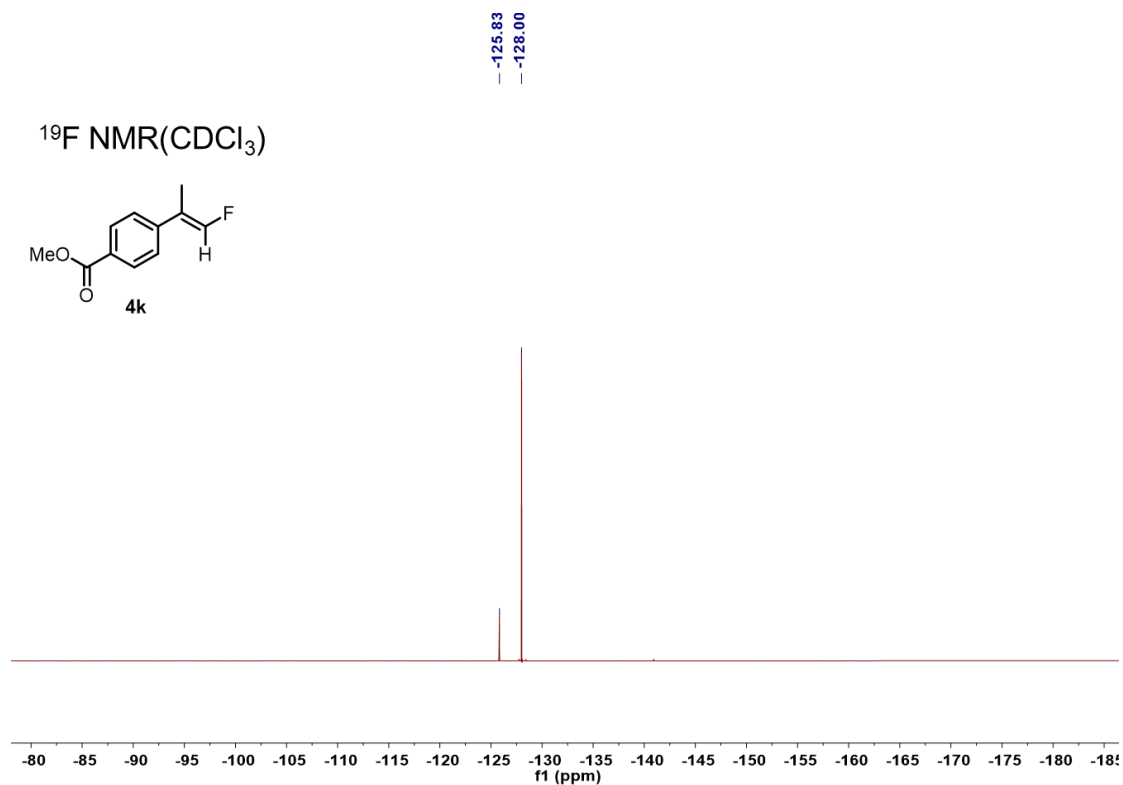

Supplementary Figure 139. <sup>19</sup>F NMR Spectrum of 4k.



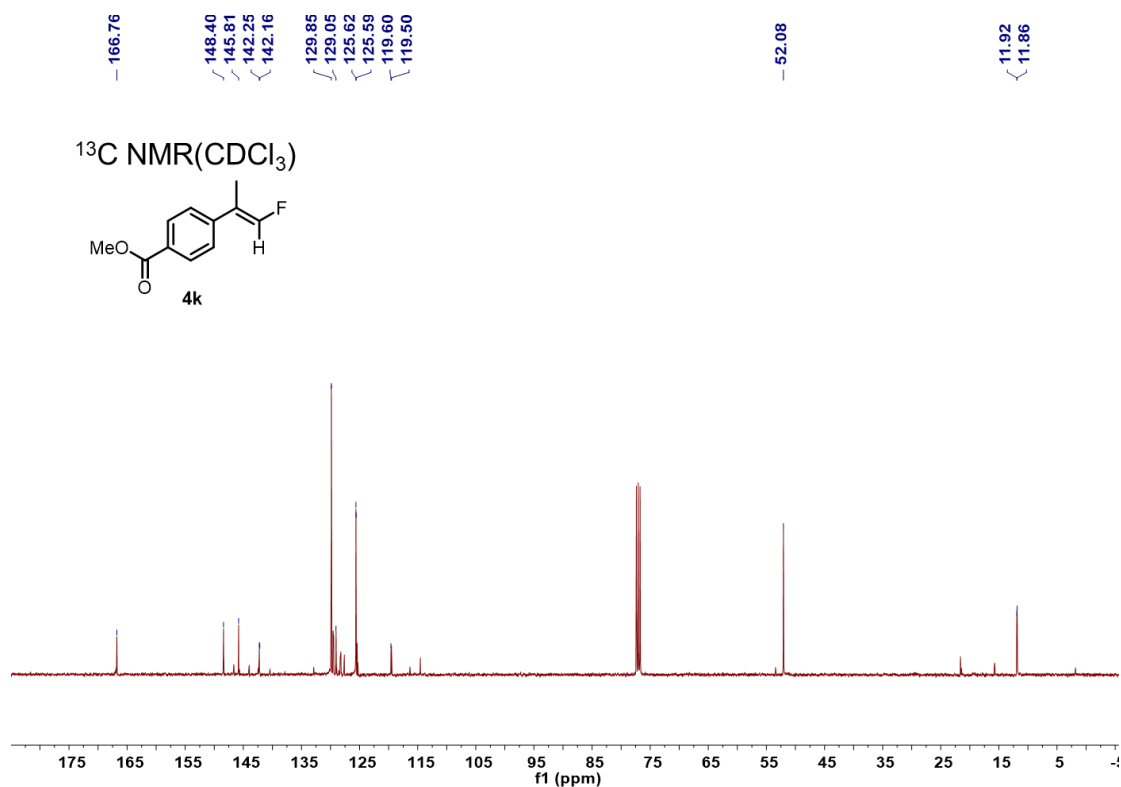

Supplementary Figure 140. <sup>13</sup>C NMR Spectrum of **4k**.

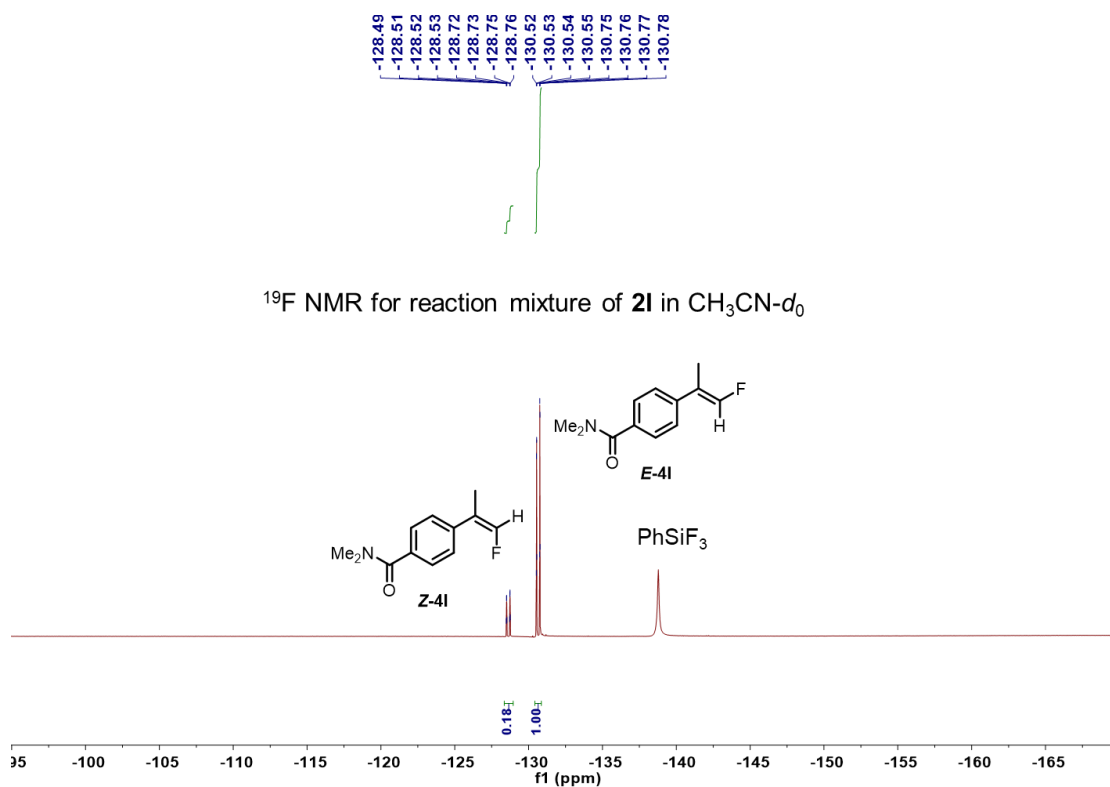

Supplementary Figure 141. <sup>19</sup>F NMR Spectrum for Reaction Mixture of **2l**.

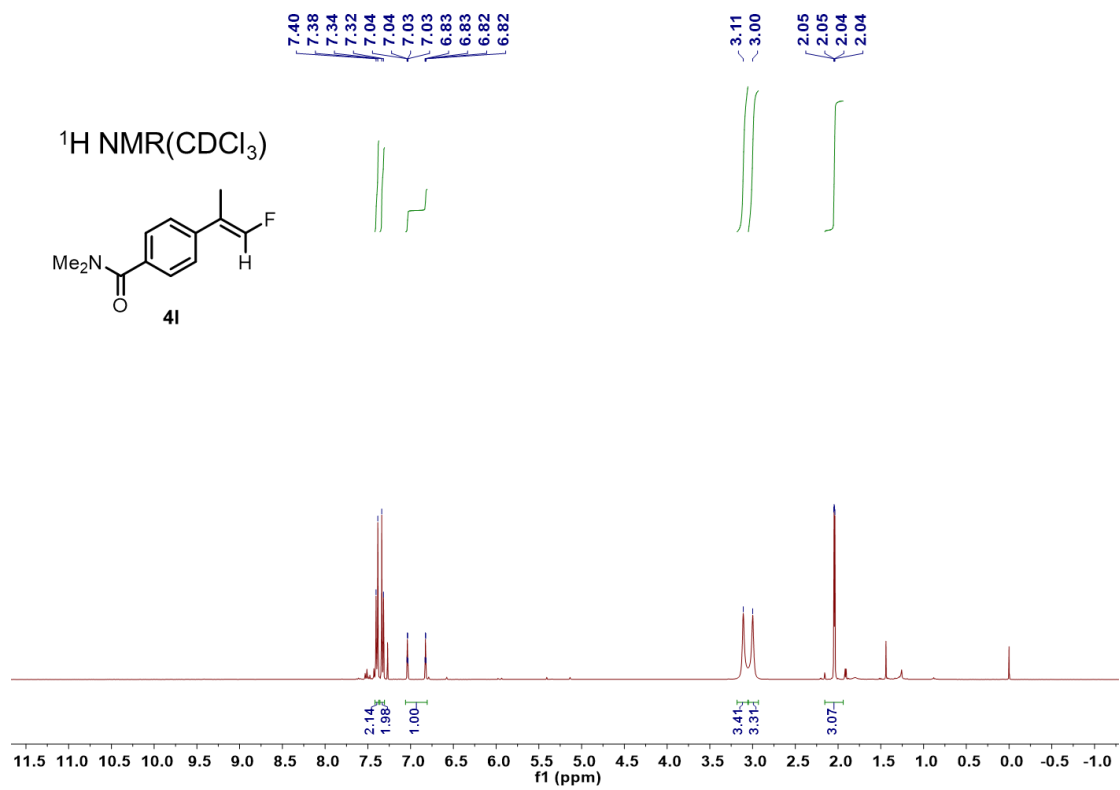

Supplementary Figure 142. <sup>1</sup>H NMR Spectrum of 41.

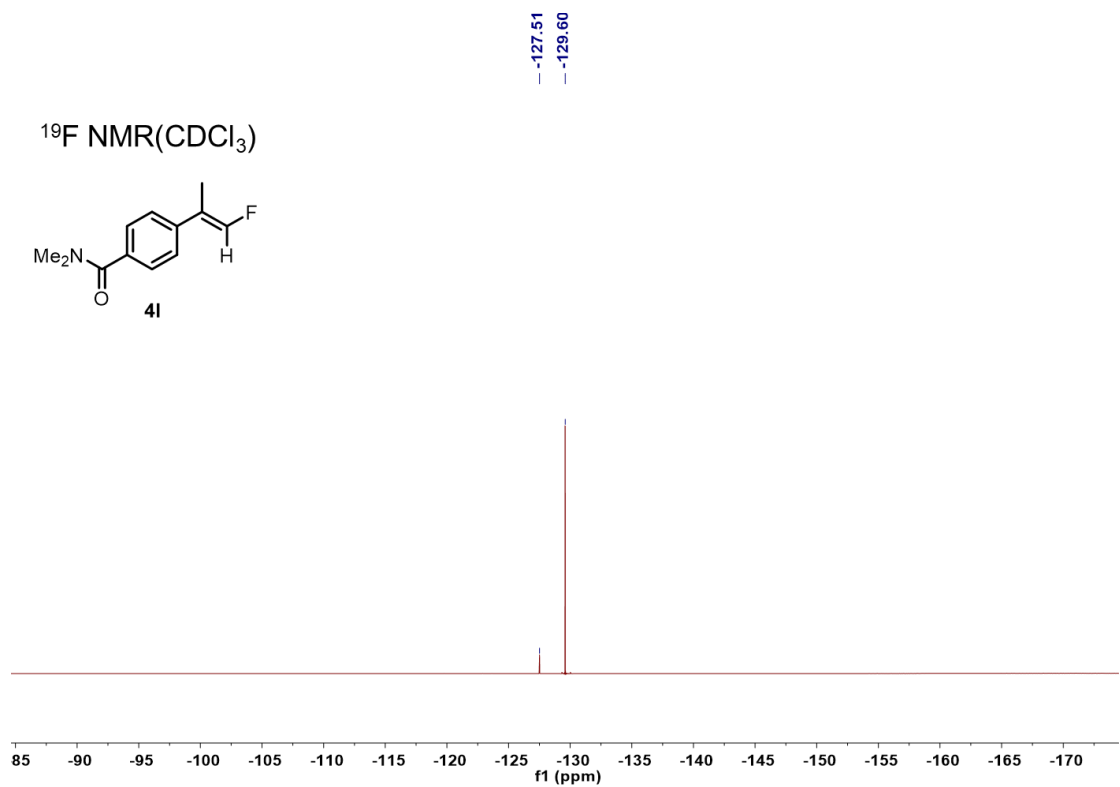

Supplementary Figure 143. <sup>19</sup>F NMR Spectrum of 41.

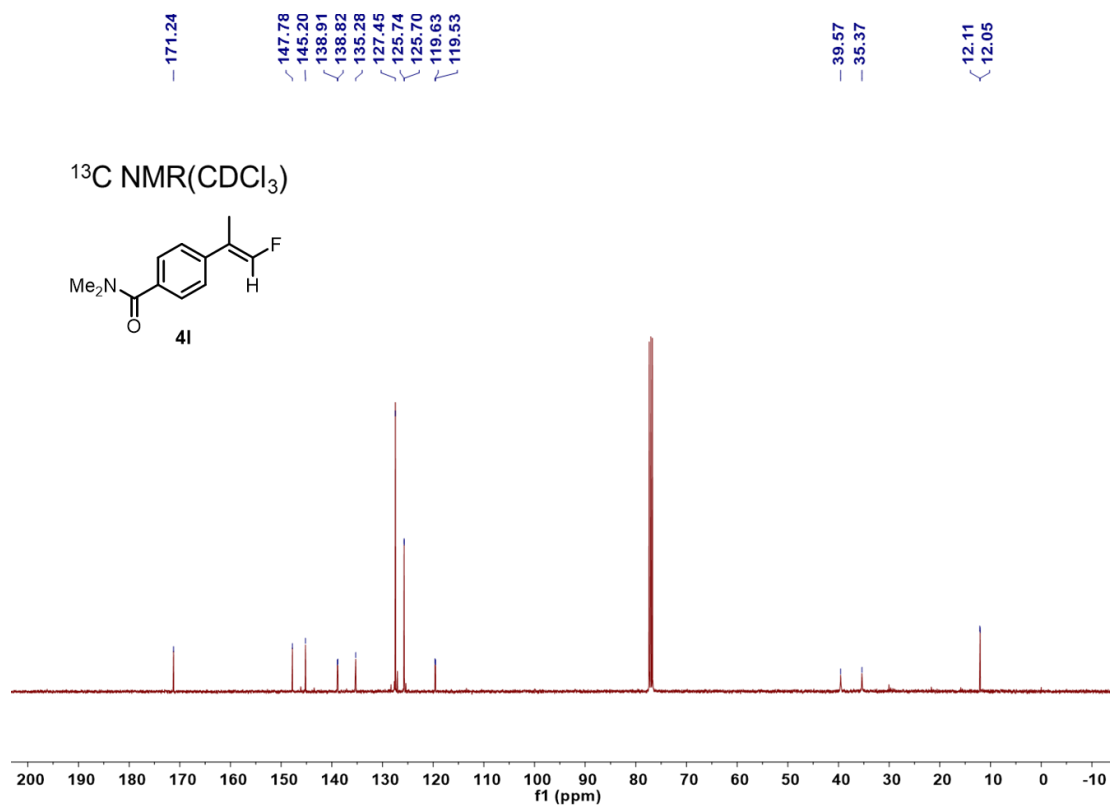

Supplementary Figure 144. <sup>13</sup>C NMR Spectrum of **4l**.

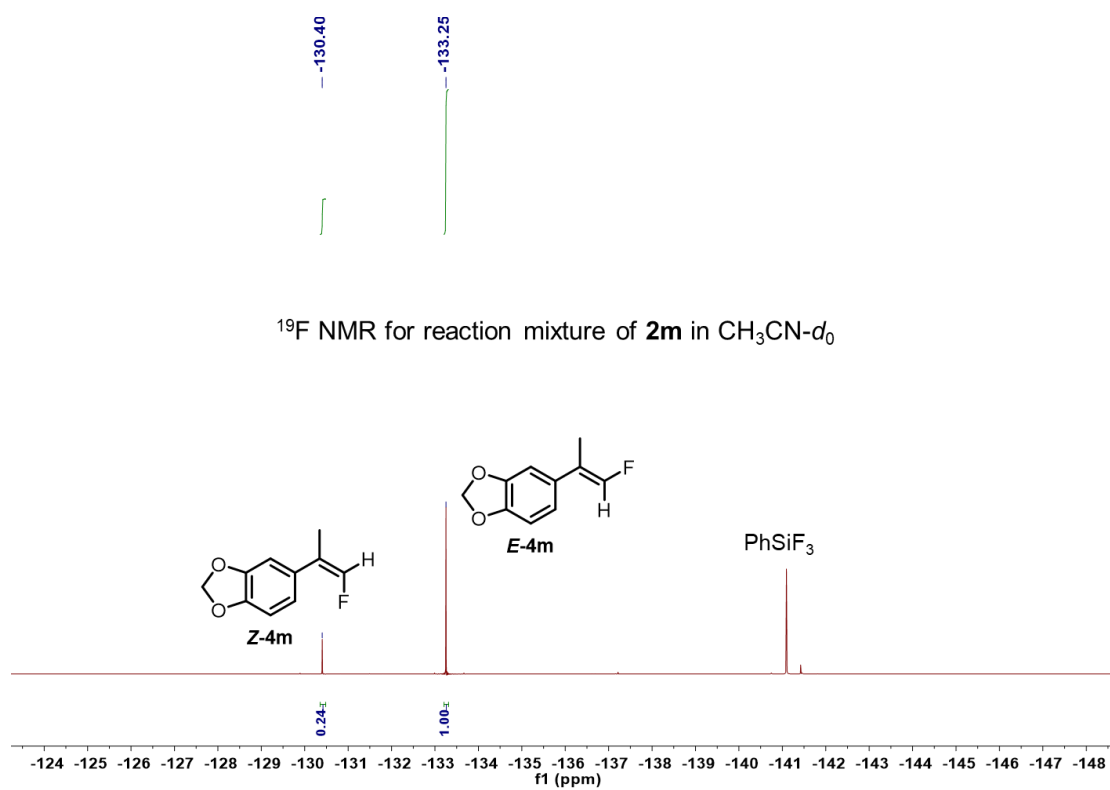

Supplementary Figure 145. <sup>19</sup>F NMR Spectrum for Reaction Mixture of **2m**.

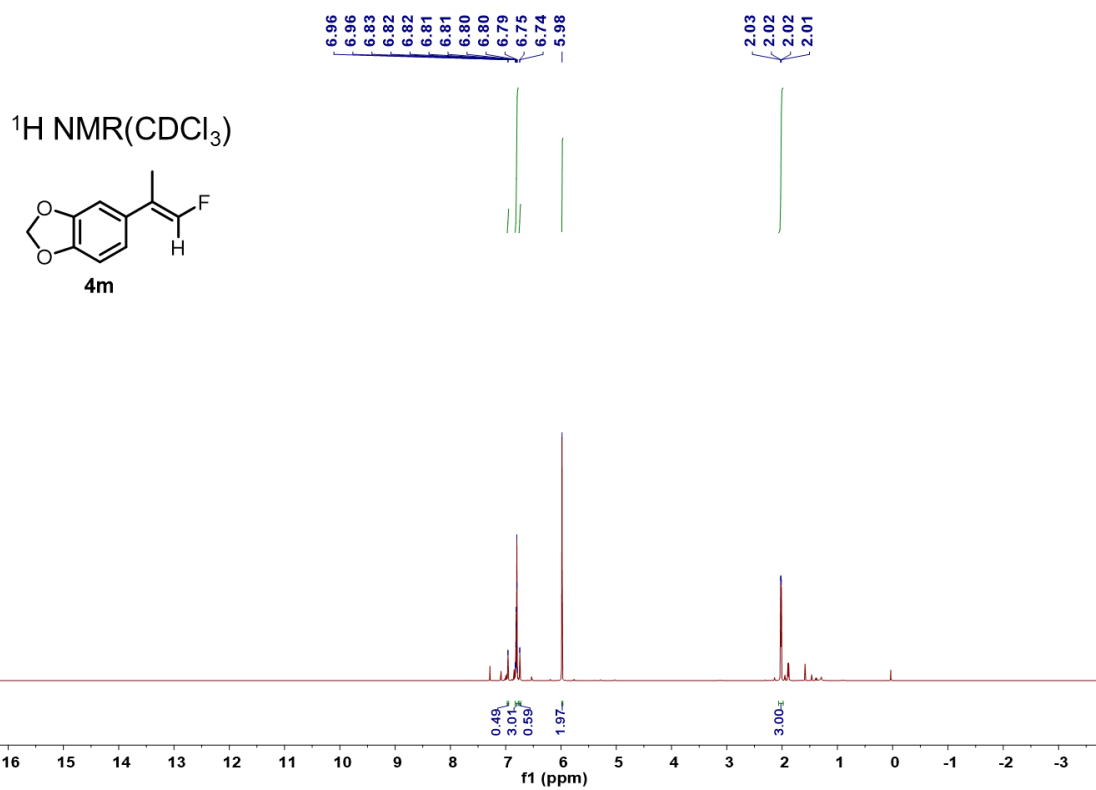

Supplementary Figure 146. <sup>1</sup>H NMR Spectrum of **4m**.

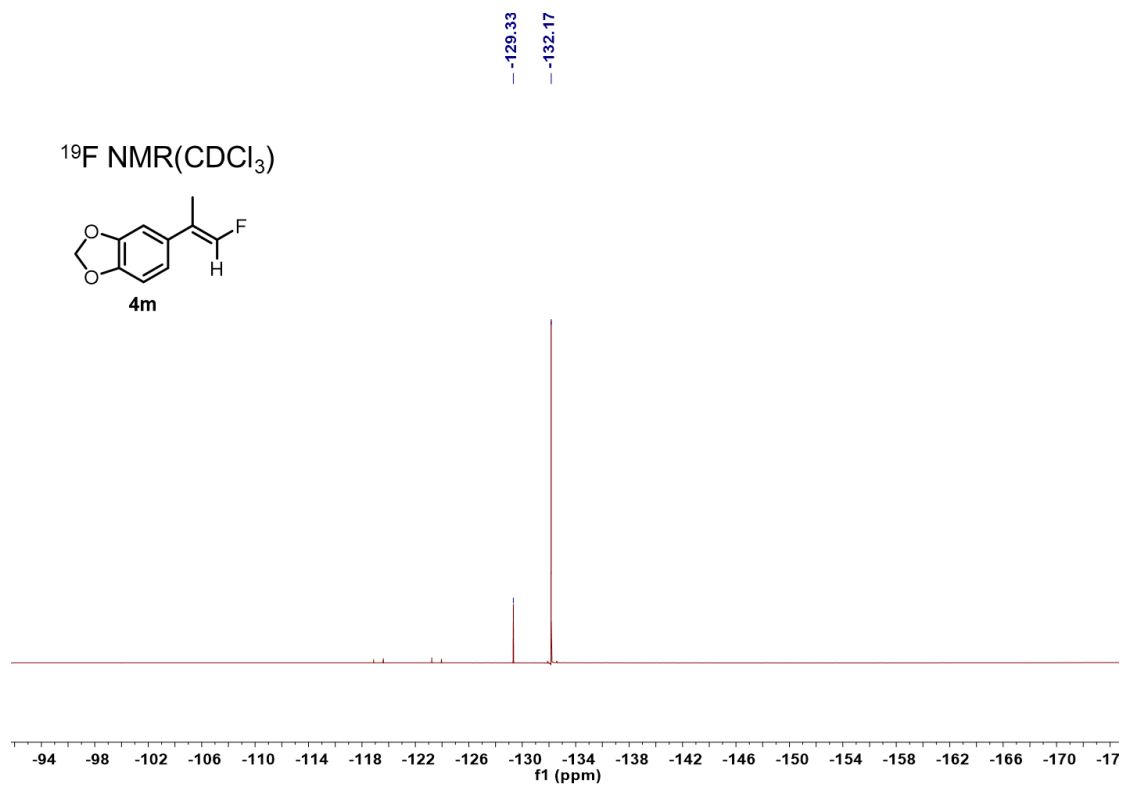

Supplementary Figure 147. <sup>19</sup>F NMR Spectrum of **4m**.

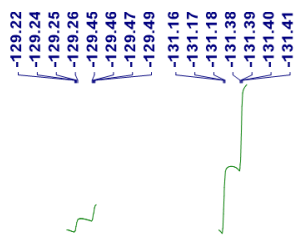

$^{19}\text{F}$  NMR for reaction mixture of **2n** in  $\text{CH}_3\text{CN}-d_0$

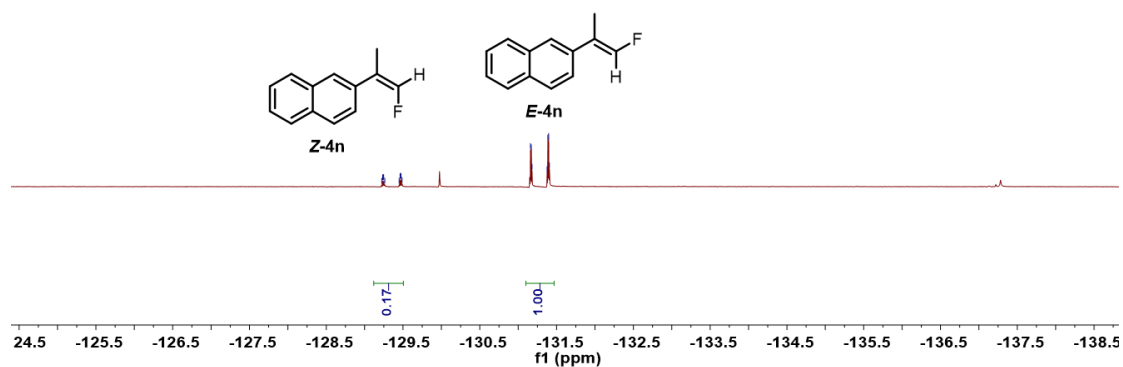

Supplementary Figure 148.  $^{19}\text{F}$  NMR Spectrum for Reaction Mixture of **2n**.

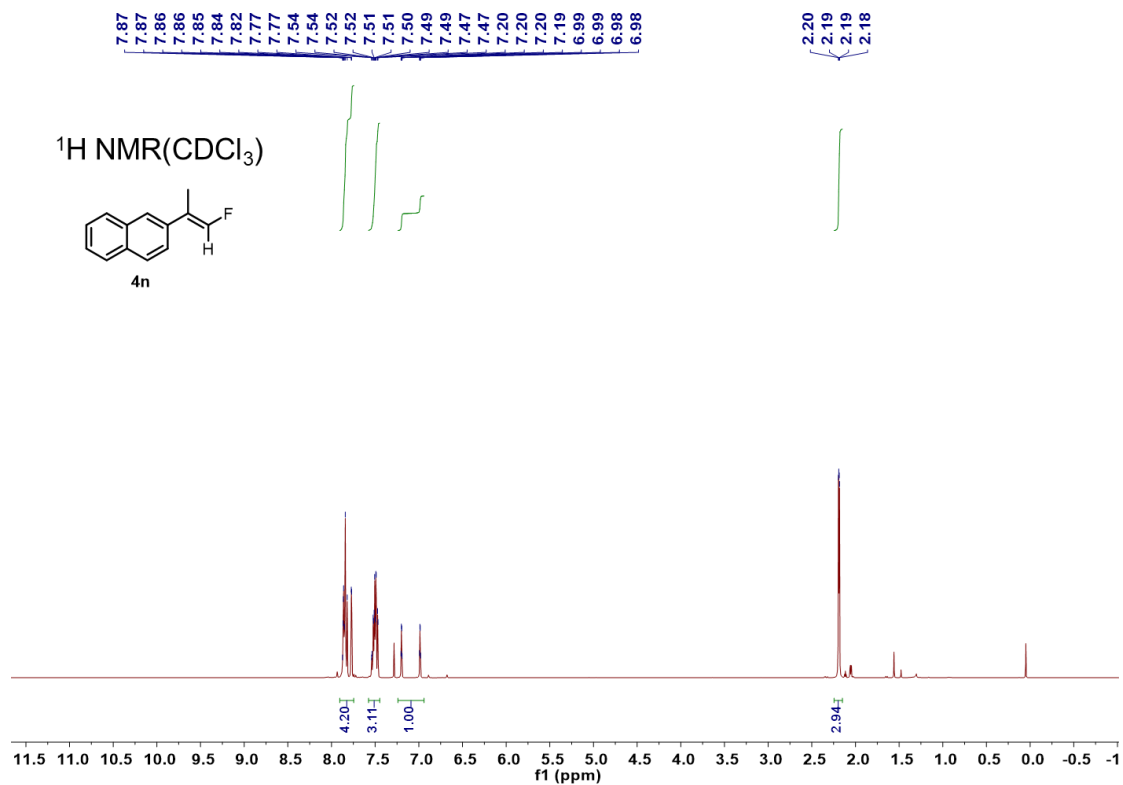

Supplementary Figure 149.  $^1\text{H}$  NMR Spectrum of **4n**.

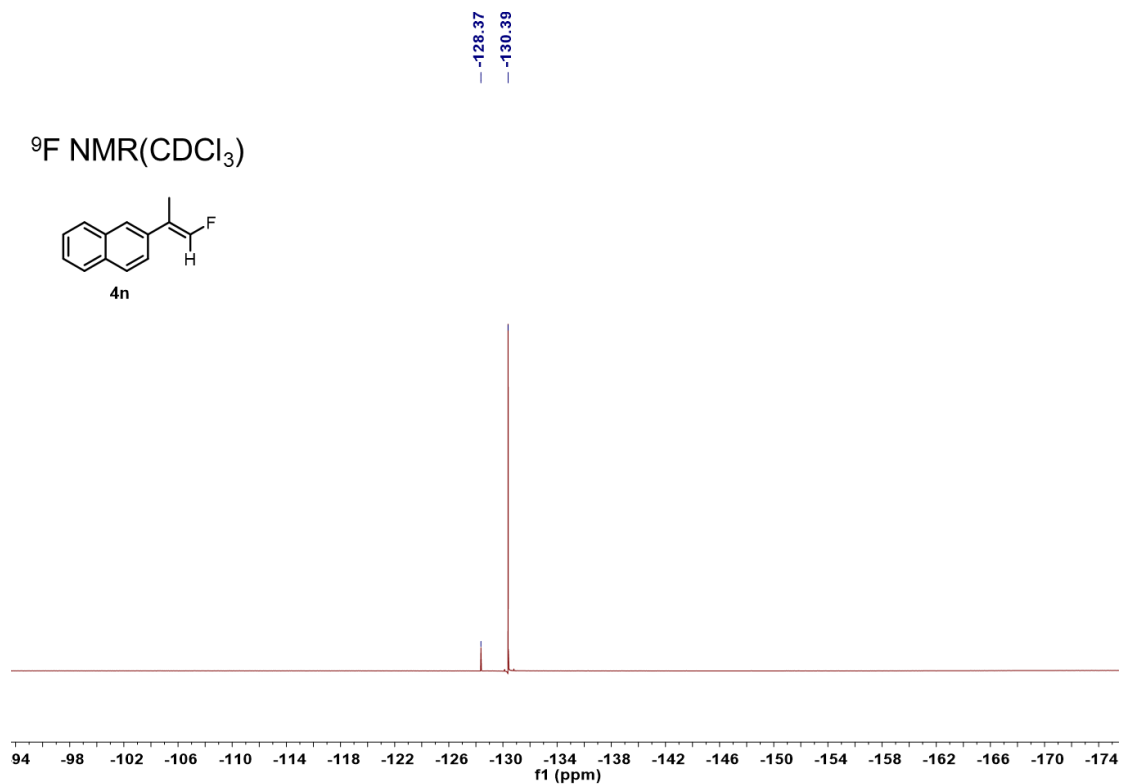

Supplementary Figure 150.  $^{19}\text{F}$  NMR Spectrum of **4n**.

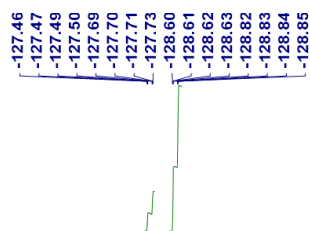

$^{19}\text{F}$  NMR for reaction mixture of **2o** in  $\text{CH}_3\text{CN}-d_0$

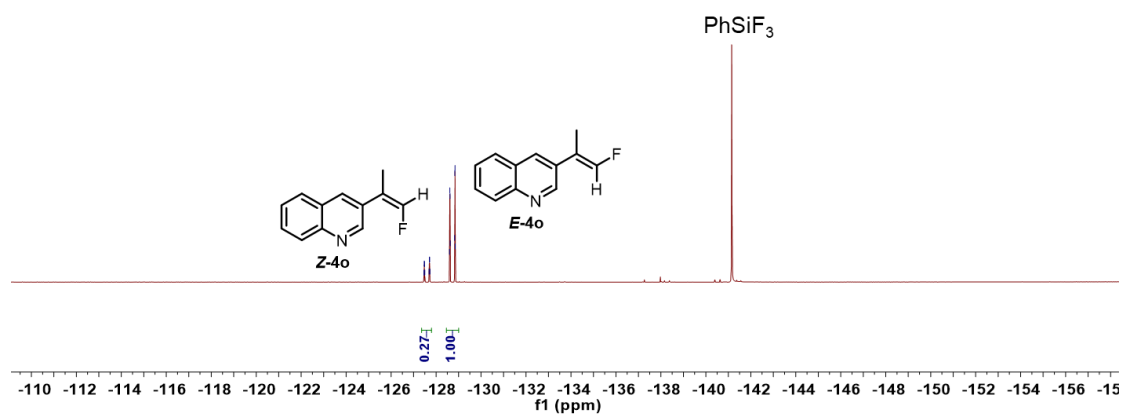

Supplementary Figure 151.  $^{19}\text{F}$  NMR Spectrum for Reaction Mixture of **2o**.

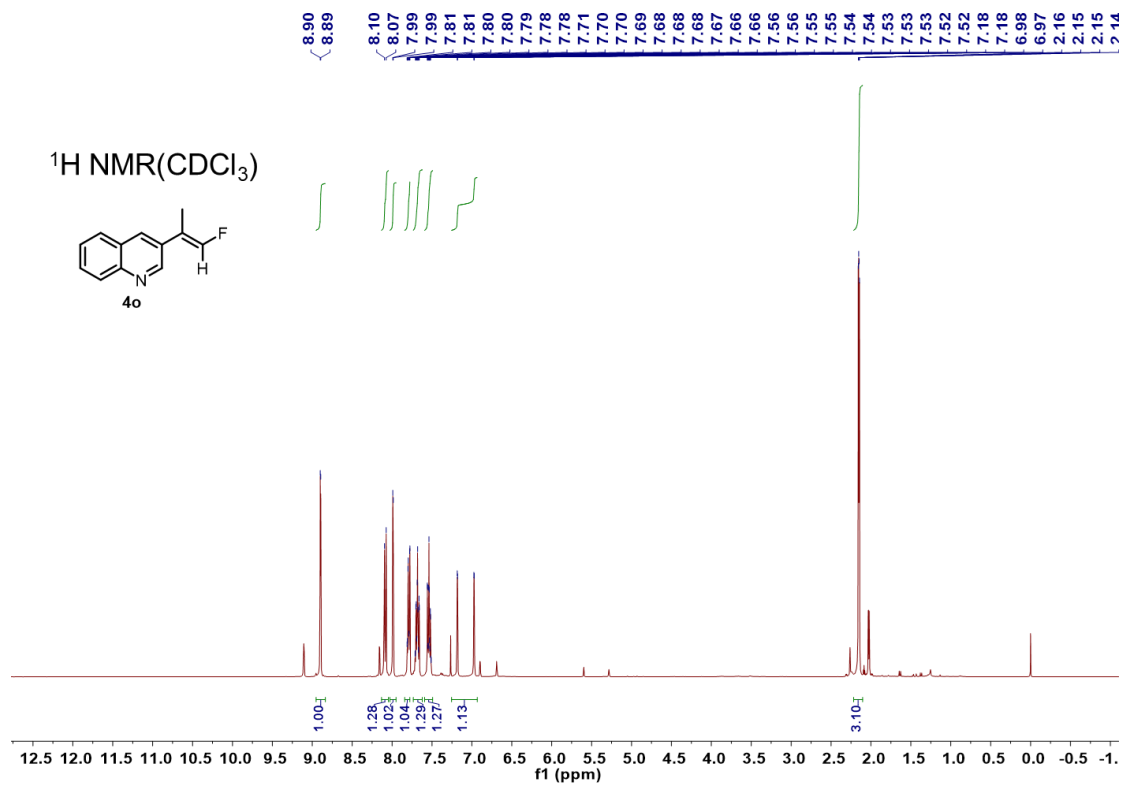

Supplementary Figure 152. <sup>1</sup>H NMR Spectrum of **4o**.

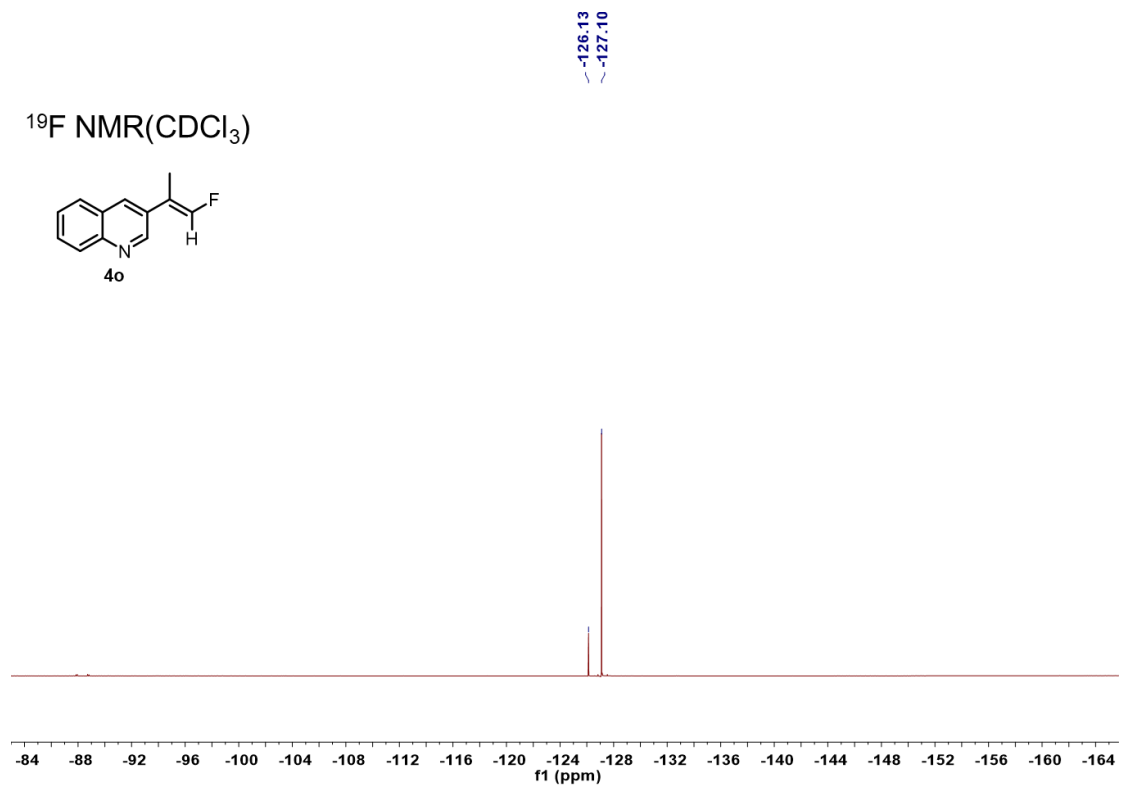

Supplementary Figure 153. <sup>19</sup>F NMR Spectrum of **4o**.

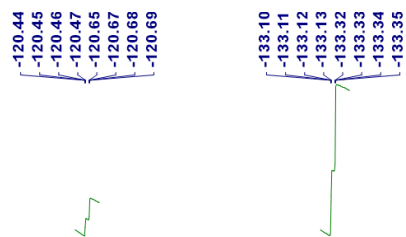

$^{19}\text{F}$  NMR for reaction mixture of **2p** in  $\text{CH}_3\text{CN-d}_0$

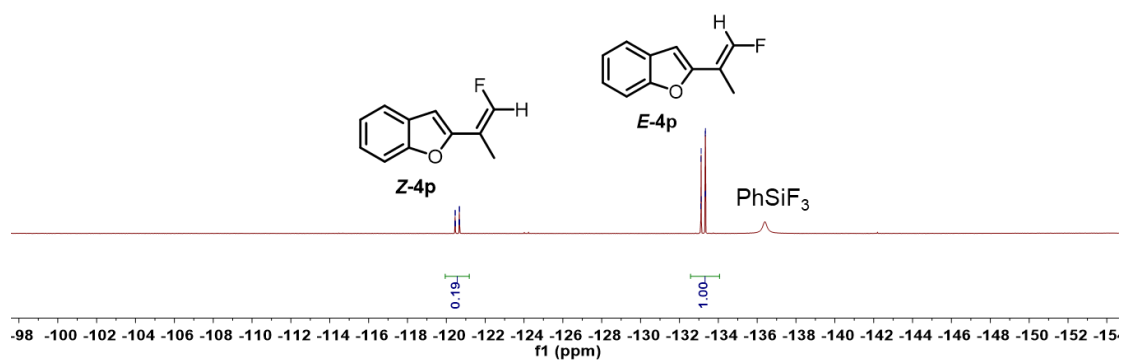

Supplementary Figure 154.  $^{19}\text{F}$  NMR Spectrum for Reaction Mixture of **2p**.

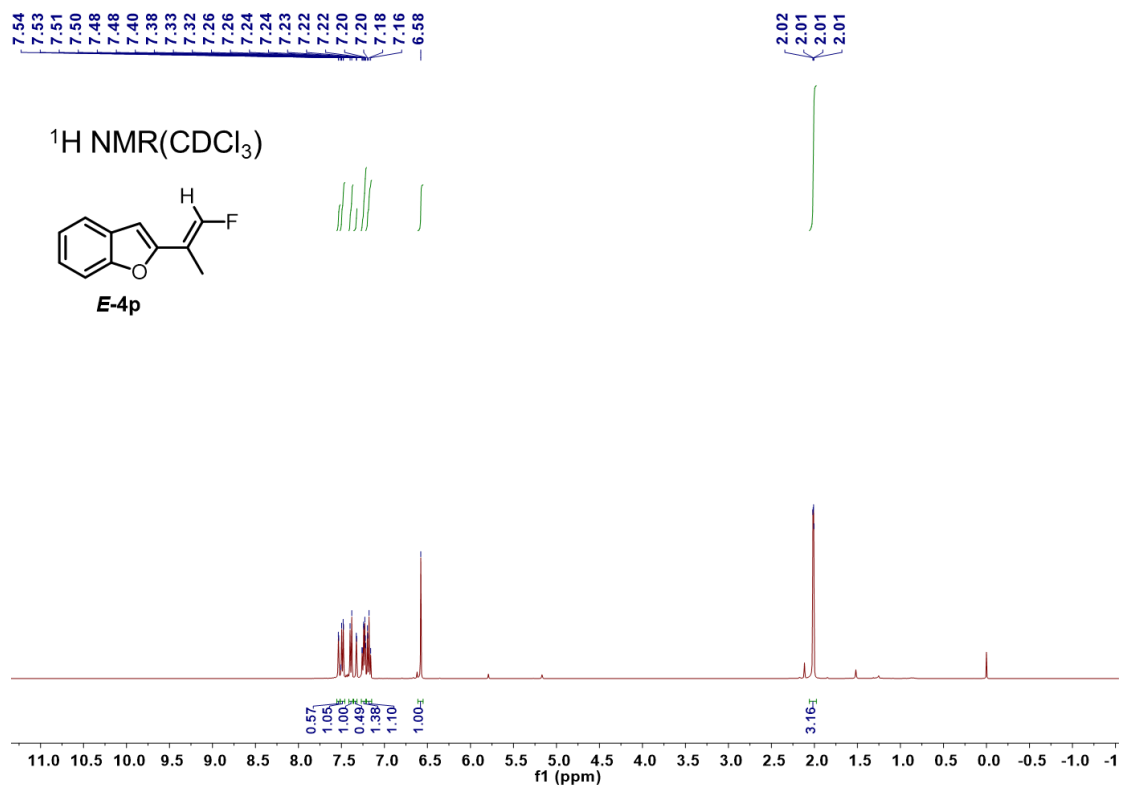

Supplementary Figure 155.  $^1\text{H}$  NMR Spectrum of **E-4p**.



$^{19}\text{F}$  NMR( $\text{CDCl}_3$ )

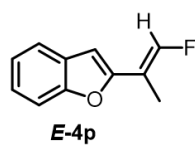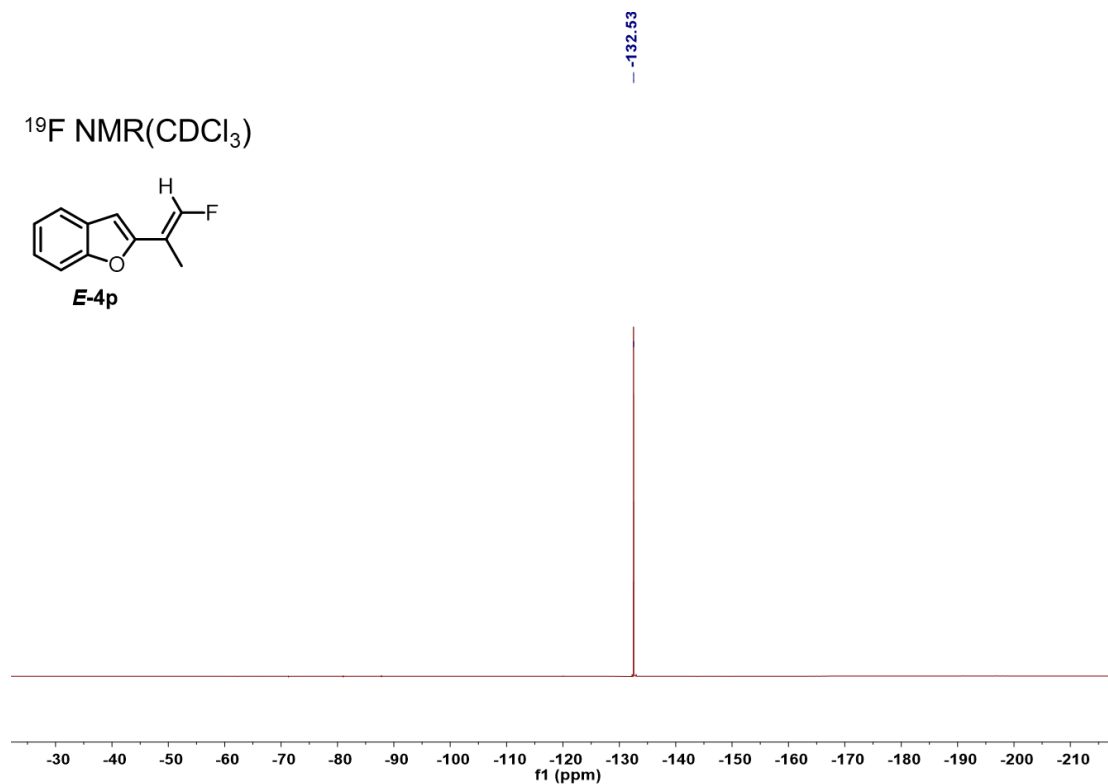

Supplementary Figure 156.  $^{19}\text{F}$  NMR Spectrum of **E-4p**.

$^{13}\text{C}$  NMR( $\text{CDCl}_3$ )

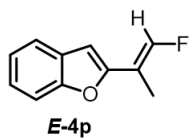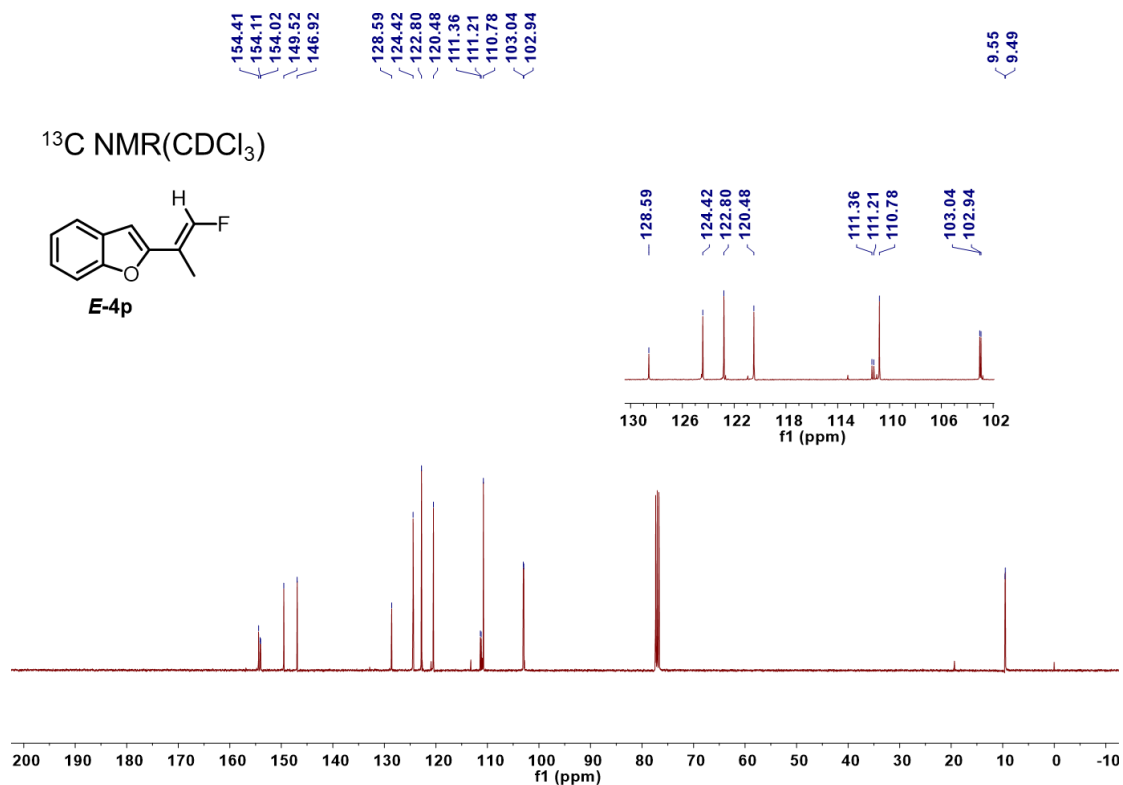

Supplementary Figure 157.  $^{13}\text{C}$  NMR Spectrum of **E-4p**.

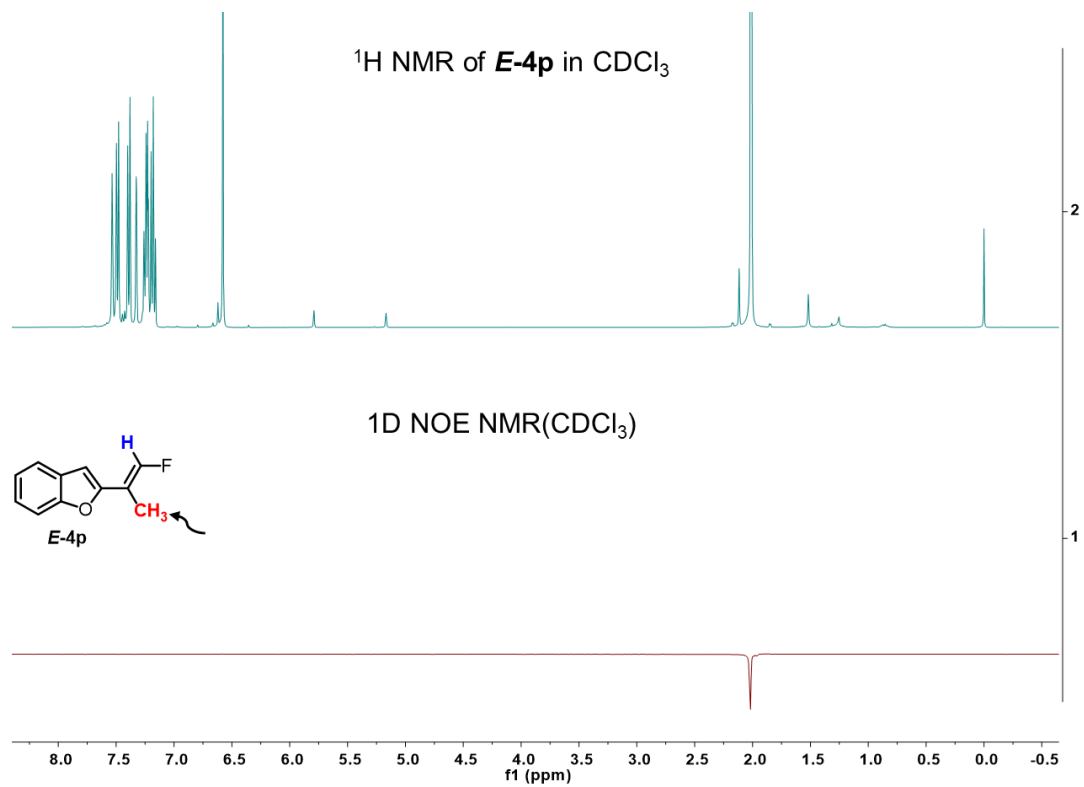

Supplementary Figure 158. 1D NOE Spectrum of **E-4p**.

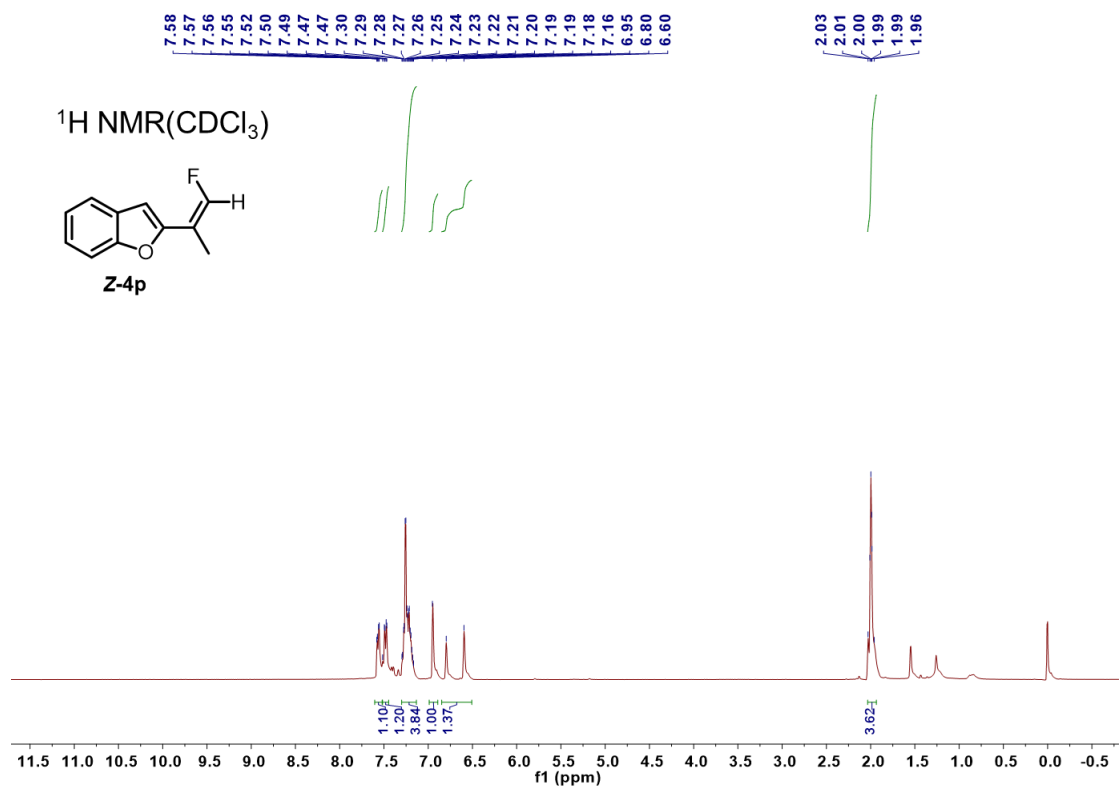

Supplementary Figure 159. <sup>1</sup>H NMR Spectrum of **Z-4p**.

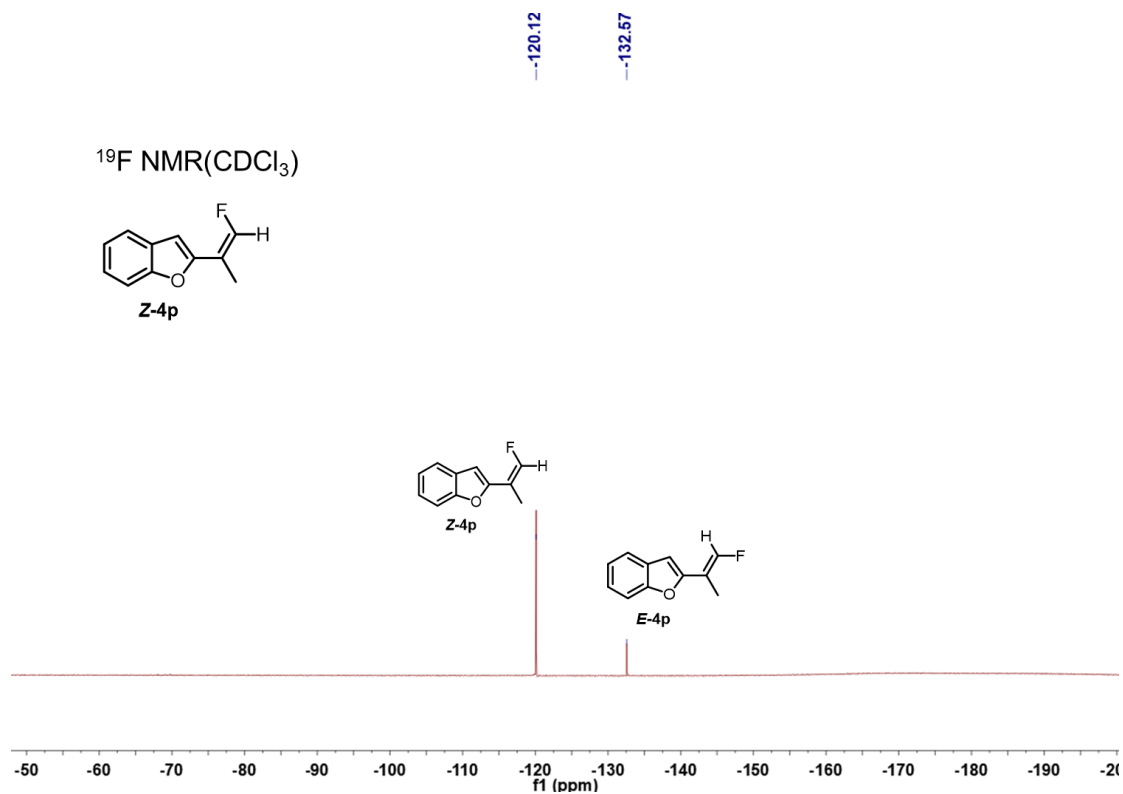

Supplementary Figure 160.  $^{19}\text{F}$  NMR Spectrum of **Z-4p**.

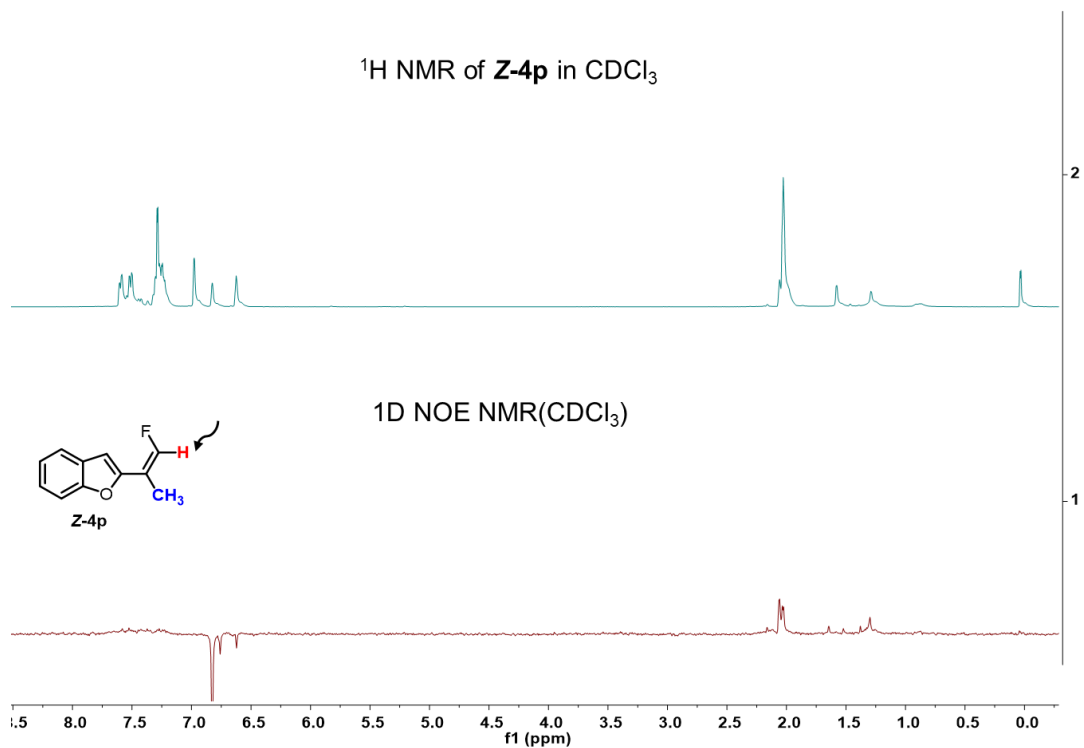

Supplementary Figure 161. 1D NOE Spectrum of **Z-4p**.

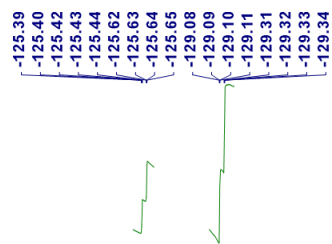

$^{19}\text{F}$  NMR for reaction mixture of **2q** in  $\text{CH}_3\text{CN}-d_0$

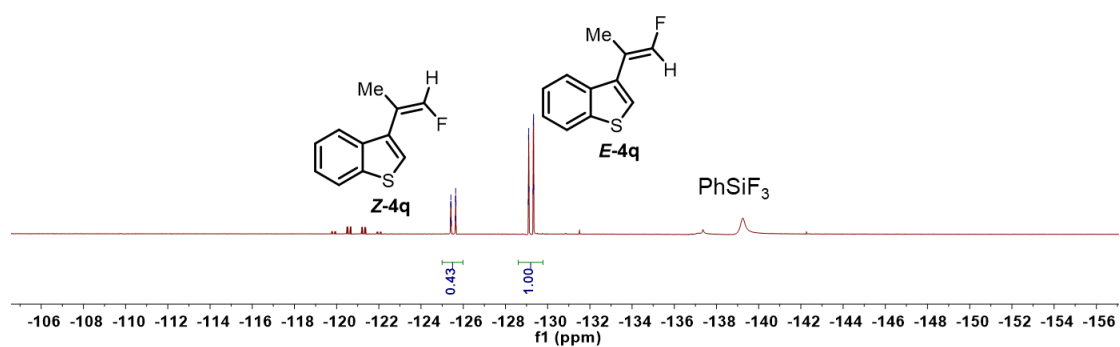

Supplementary Figure 162.  $^{19}\text{F}$  NMR Spectrum for Reaction Mixture of **2q**.

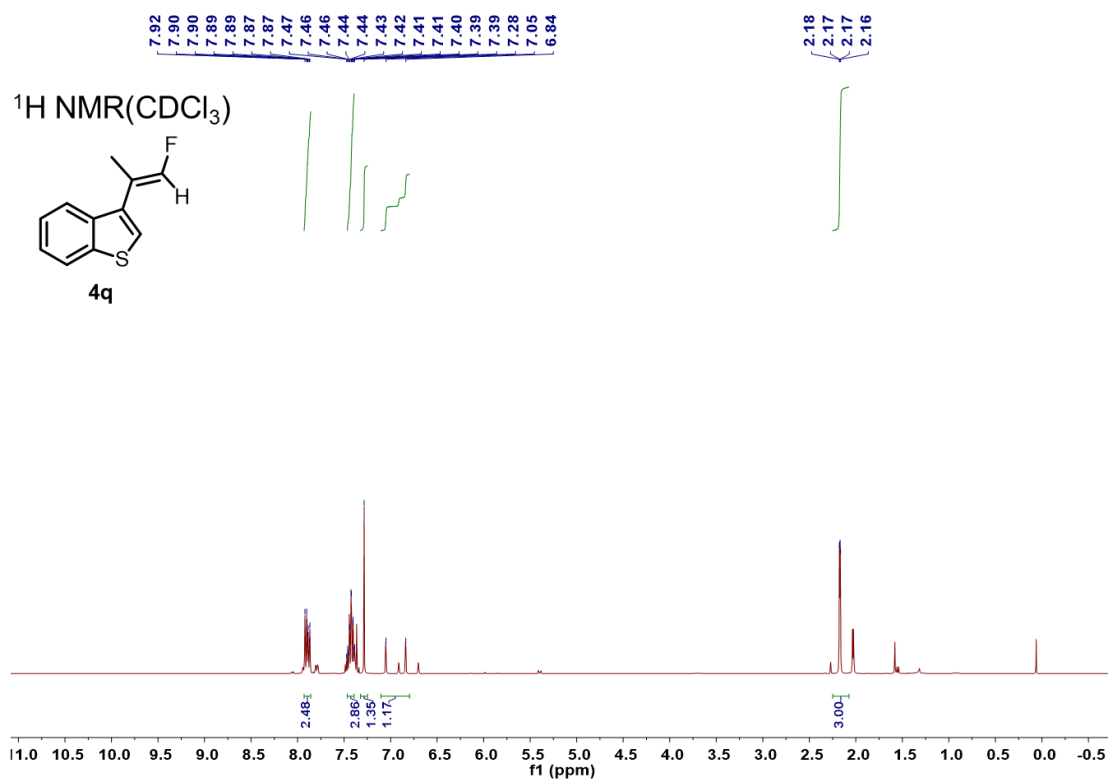

Supplementary Figure 163.  $^1\text{H}$  NMR Spectrum for **4q**.

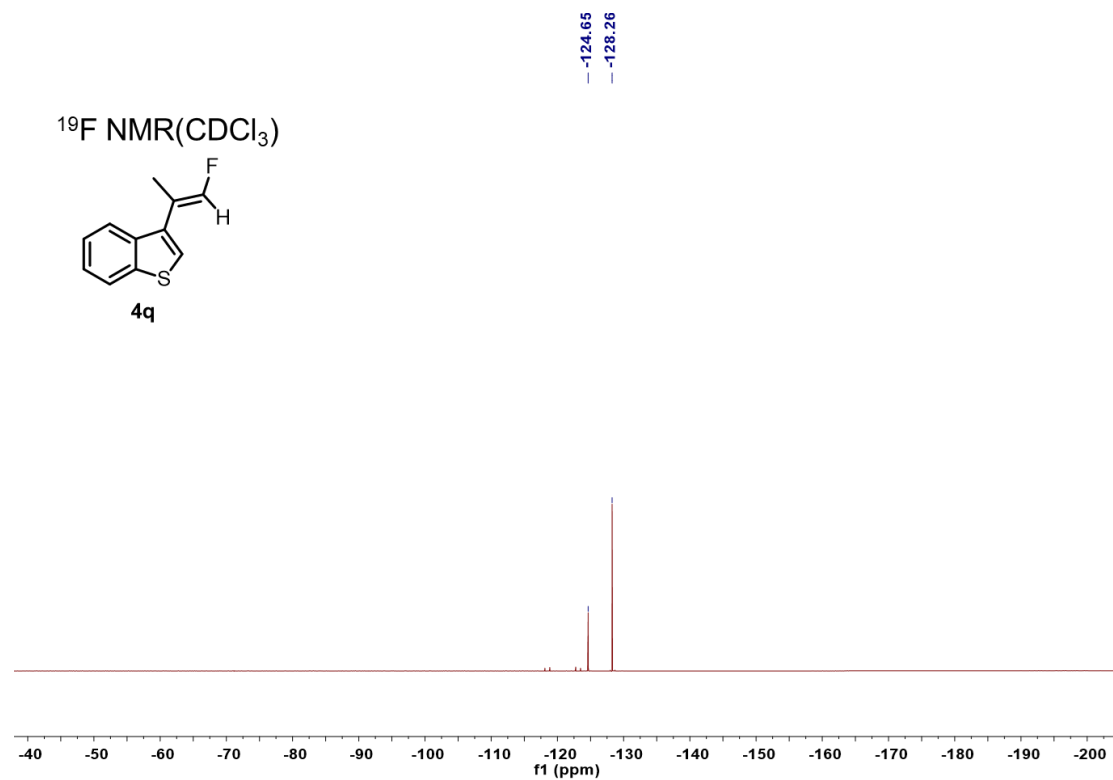

Supplementary Figure 164. <sup>19</sup>F NMR Spectrum for **4q**.

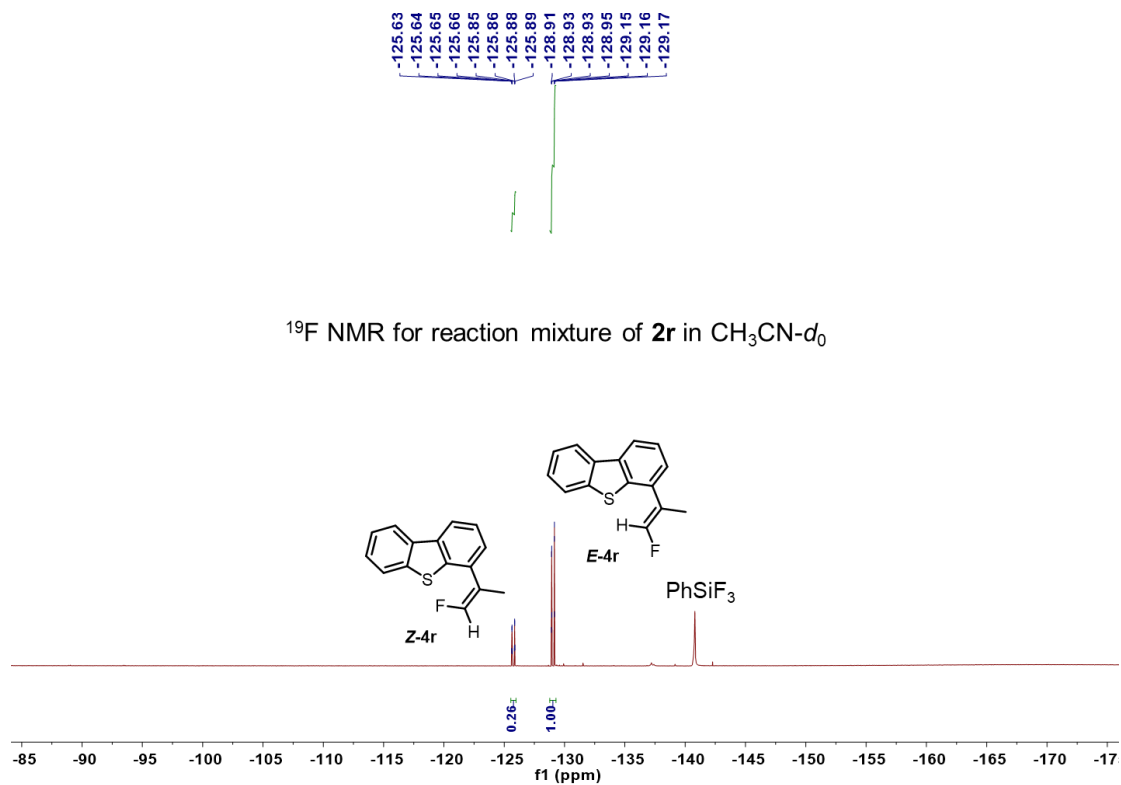

Supplementary Figure 165. <sup>19</sup>F NMR Spectrum for Reaction Mixture of **2r**.

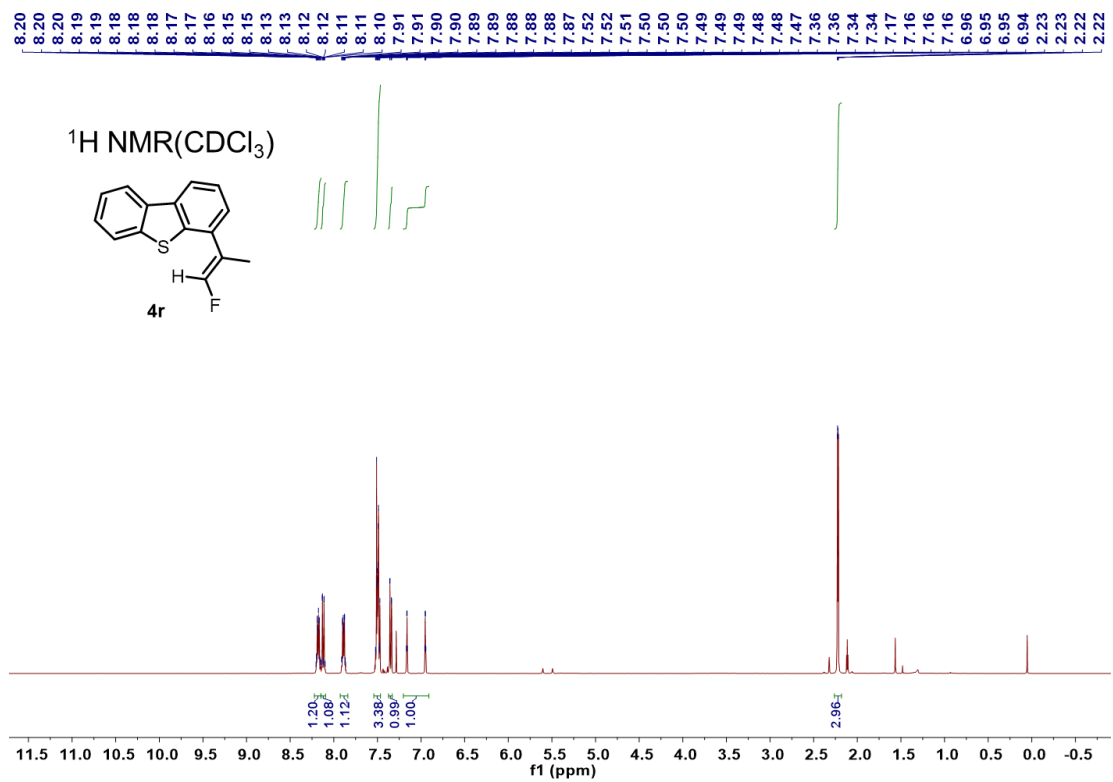

Supplementary Figure 166. <sup>1</sup>H NMR Spectrum for **4r**.

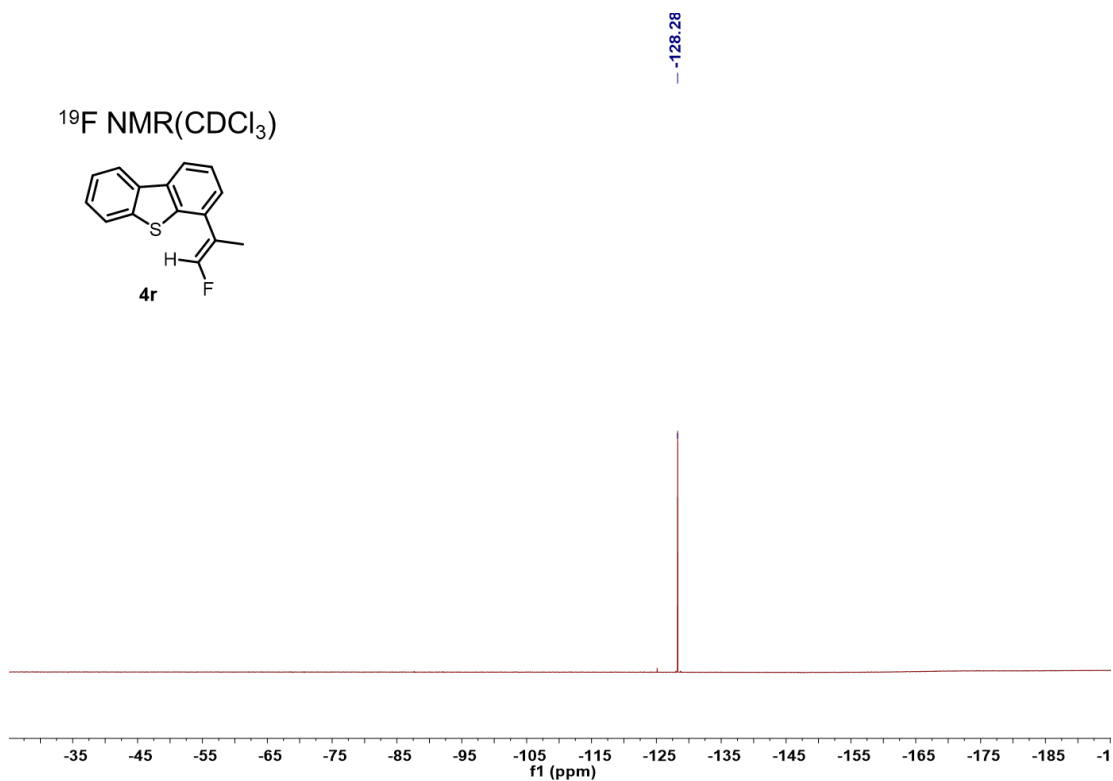

Supplementary Figure 167. <sup>19</sup>F NMR Spectrum for **4r**.

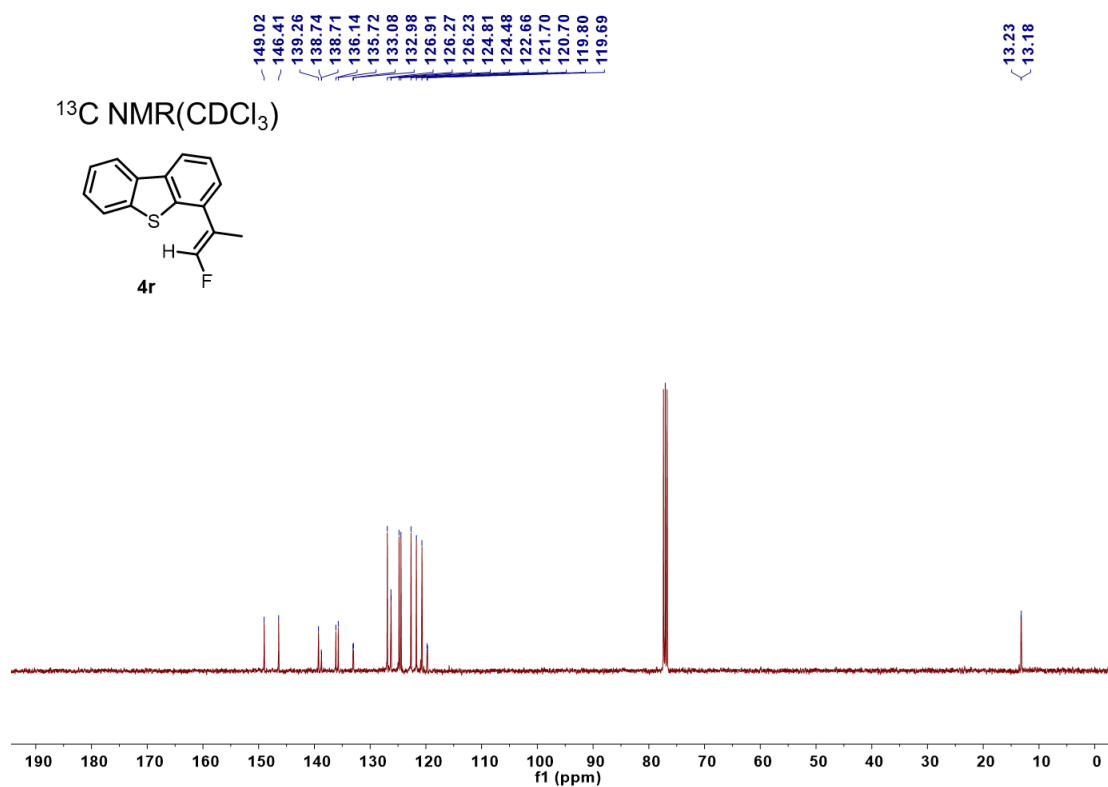

Supplementary Figure 168. <sup>13</sup>C NMR Spectrum for 4r.

SMD-M06-2X/6-31+G(d) calculated cartesian coordinates and energies

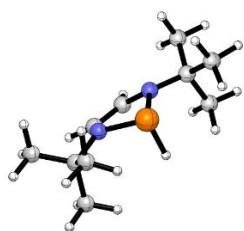

**1**

|   |             |             |             |
|---|-------------|-------------|-------------|
| C | 0.67199900  | -1.47102800 | -0.00052700 |
| C | -0.67199100 | -1.47103400 | -0.00052900 |
| H | 1.30943400  | -2.34009900 | 0.10508000  |
| H | -1.30941700 | -2.34011200 | 0.10507200  |
| N | -1.22405600 | -0.20749000 | -0.31245700 |
| N | 1.22405500  | -0.20748100 | -0.31244300 |
| C | -2.65439200 | 0.05669300  | -0.02542700 |
| C | -2.97999900 | 1.49828400  | -0.41849200 |
| C | -3.50562200 | -0.89136400 | -0.87487700 |
| C | -2.95874100 | -0.15121400 | 1.46344500  |
| H | -2.47183900 | 2.22348900  | 0.22907800  |
| H | -2.69463500 | 1.69650300  | -1.45779900 |
| H | -4.05713800 | 1.66650300  | -0.31752900 |
| H | -3.30982600 | -1.94151500 | -0.63538000 |
| H | -4.56793600 | -0.69989600 | -0.68873300 |
| H | -3.30376600 | -0.73464600 | -1.94032500 |

|   |             |             |             |
|---|-------------|-------------|-------------|
| H | -4.00929500 | 0.08082200  | 1.67046500  |
| H | -2.77419100 | -1.18921300 | 1.76244000  |
| H | -2.33513800 | 0.50065200  | 2.08589300  |
| C | 2.65439200  | 0.05669900  | -0.02542800 |
| C | 3.50559400  | -0.89142900 | -0.87482400 |
| C | 2.98003800  | 1.49826100  | -0.41856800 |
| C | 2.95873300  | -0.15114300 | 1.46345500  |
| H | 3.30973700  | -1.94156000 | -0.63528900 |
| H | 3.30376600  | -0.73474200 | -1.94028200 |
| H | 4.56791400  | -0.70000600 | -0.68866500 |
| H | 2.47190000  | 2.22351500  | 0.22896500  |
| H | 4.05718100  | 1.66645700  | -0.31761500 |
| H | 2.69467900  | 1.69643500  | -1.45788500 |
| H | 4.00929400  | 0.08087400  | 1.67046600  |
| H | 2.33514700  | 0.50077400  | 2.08586700  |
| H | 2.77415300  | -1.18912000 | 1.76250300  |
| P | -0.00000500 | 0.99545600  | -0.02788700 |
| H | -0.00001500 | 0.95148400  | 1.43690700  |

Zero-point correction= 0.301634 (Hartree/Particle)

Thermal correction to Energy= 0.316973

Thermal correction to Enthalpy= 0.317917

Thermal correction to Gibbs Free Energy= 0.260728

Sum of electronic and zero-point Energies= -843.995832

Sum of electronic and thermal Energies= -843.980493

Sum of electronic and thermal Enthalpies= -843.979549

Sum of electronic and thermal Free Energies= -844.036738

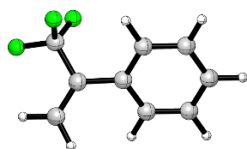

**2c**

|   |             |             |             |
|---|-------------|-------------|-------------|
| C | 2.96590700  | 0.88362600  | 0.32995800  |
| C | 1.62607200  | 1.25423800  | 0.25483600  |
| C | 0.64414300  | 0.32051000  | -0.10692900 |
| C | 1.03466300  | -1.00134400 | -0.36610700 |
| C | 2.37666500  | -1.37043300 | -0.28712700 |
| C | 3.34729500  | -0.43089800 | 0.05714100  |
| H | 3.71144600  | 1.62113500  | 0.61446800  |
| H | 1.33643900  | 2.27333400  | 0.49666500  |
| H | 0.30013800  | -1.75098400 | -0.64500400 |
| H | 2.66046200  | -2.39753700 | -0.49898200 |
| H | 4.39233700  | -0.72139900 | 0.11874400  |
| C | -0.77382600 | 0.75651100  | -0.20702200 |
| C | -1.16121100 | 1.98265500  | -0.56744100 |



|   |             |             |             |
|---|-------------|-------------|-------------|
| H | -0.43170200 | 2.73621400  | -0.84914700 |
| H | -2.20807800 | 2.26615900  | -0.60062000 |
| C | -1.83292700 | -0.26564300 | 0.11585900  |
| F | -1.97051100 | -1.18857300 | -0.86445900 |
| F | -1.54895000 | -0.95341900 | 1.24136400  |
| F | -3.04961900 | 0.27507500  | 0.29252500  |

Zero-point correction= 0.140004 (Hartree/Particle)

Thermal correction to Energy= 0.149875

Thermal correction to Enthalpy= 0.150819

Thermal correction to Gibbs Free Energy= 0.103647

Sum of electronic and zero-point Energies= -646.335958

Sum of electronic and thermal Energies= -646.326087

Sum of electronic and thermal Enthalpies= -646.325142

Sum of electronic and thermal Free Energies= -646.372315

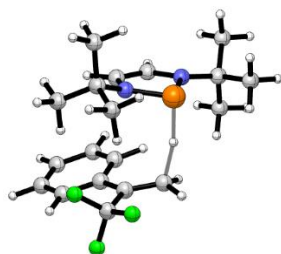

**TS1**

|   |             |             |             |
|---|-------------|-------------|-------------|
| C | 2.14510200  | 0.63940900  | 1.25611000  |
| C | 1.11425700  | -0.08355900 | 1.73564000  |
| H | 2.56564200  | 1.53237600  | 1.70044200  |
| H | 0.57284500  | 0.10326200  | 2.65320700  |
| N | 0.77881400  | -1.16228800 | 0.90954900  |
| C | 0.01955400  | -2.33313300 | 1.41755600  |
| C | -0.40610100 | -3.19259600 | 0.22647200  |
| C | 0.91291300  | -3.14484100 | 2.36047900  |
| C | -1.22609800 | -1.83943700 | 2.15814600  |
| H | -0.94552600 | -2.59236800 | -0.51548600 |
| H | 0.45451000  | -3.66383900 | -0.26126800 |
| H | -1.07226800 | -3.99030400 | 0.57031900  |
| H | 1.22014800  | -2.53779900 | 3.21970100  |
| H | 0.37558500  | -4.02371100 | 2.73459300  |
| H | 1.81239600  | -3.48471200 | 1.83403500  |
| H | -1.85076500 | -2.69811000 | 2.42618800  |
| H | -0.97306300 | -1.31553300 | 3.08542600  |
| H | -1.81261600 | -1.16692400 | 1.52355400  |
| C | 3.70135300  | 0.83664200  | -0.70577900 |
| C | 4.91052900  | 1.12010500  | 0.18940300  |
| C | 4.13989300  | -0.03528300 | -1.88191100 |
| C | 3.10251700  | 2.14789600  | -1.22917100 |
| H | 4.65218400  | 1.77171900  | 1.03035900  |

|   |             |             |             |
|---|-------------|-------------|-------------|
| H | 5.32049500  | 0.18476400  | 0.58567200  |
| H | 5.68897500  | 1.62230100  | -0.39464500 |
| H | 3.31187100  | -0.22972900 | -2.57546100 |
| H | 4.92265000  | 0.48584500  | -2.44177400 |
| H | 4.54444500  | -0.99316300 | -1.53663500 |
| H | 3.84669200  | 2.69258700  | -1.82083400 |
| H | 2.23448700  | 1.94549900  | -1.86707100 |
| H | 2.78648800  | 2.79330500  | -0.40151900 |
| C | -2.73771200 | -0.57716600 | -1.54391600 |
| C | -1.66157400 | 0.40562000  | -1.24595400 |
| C | -1.86518500 | 1.35692900  | -0.15080700 |
| C | -3.09243900 | 1.48666600  | 0.53836000  |
| C | -0.80814800 | 2.19818800  | 0.25439800  |
| C | -3.25142800 | 2.42084700  | 1.55683500  |
| H | -3.94100700 | 0.86322600  | 0.27473800  |
| C | -0.97554800 | 3.13704400  | 1.27068400  |
| H | 0.16313200  | 2.11602600  | -0.22445100 |
| C | -2.19712500 | 3.25917500  | 1.93077200  |
| H | -4.21216900 | 2.49788200  | 2.05969500  |
| H | -0.13563200 | 3.76822300  | 1.55177200  |
| H | -2.32736700 | 3.99053500  | 2.72322400  |
| F | -3.17214300 | -1.29176000 | -0.47156100 |
| F | -2.38129200 | -1.49276300 | -2.46870800 |
| F | -3.86823000 | 0.01201600  | -2.03520200 |
| C | -0.54292500 | 0.41181600  | -2.05763200 |
| H | 0.05928800  | 1.31571200  | -2.11962500 |
| H | -0.52678400 | -0.20375900 | -2.95294300 |
| P | 1.70064000  | -1.16080900 | -0.53692000 |
| N | 2.67793000  | 0.10888600  | 0.07782600  |
| H | 0.66253600  | -0.33074100 | -1.41791300 |

Zero-point correction= 0.440653 (Hartree/Particle)

Thermal correction to Energy= 0.466991

Thermal correction to Enthalpy= 0.467935

Thermal correction to Gibbs Free Energy= 0.384772

Sum of electronic and zero-point Energies= -1490.324394

Sum of electronic and thermal Energies= -1490.298056

Sum of electronic and thermal Enthalpies= -1490.297112

Sum of electronic and thermal Free Energies= -1490.380275

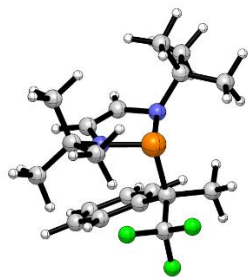

A

|   |             |             |             |
|---|-------------|-------------|-------------|
| C | -2.63071500 | -2.07951400 | -2.63153700 |
| C | -2.80307600 | -0.74197200 | -2.27534100 |
| C | -2.28879000 | -0.25595100 | -1.07515700 |
| C | -1.58995700 | -1.09635500 | -0.19095500 |
| C | -1.44883900 | -2.44481800 | -0.55184500 |
| C | -1.95532300 | -2.92932200 | -1.75780900 |
| H | -3.02479000 | -2.45496600 | -3.57192900 |
| H | -3.33385700 | -0.06398100 | -2.93906200 |
| H | -2.41638900 | 0.79571600  | -0.84987100 |
| H | -0.92708800 | -3.13709800 | 0.09950600  |
| H | -1.81859100 | -3.97774100 | -2.00989500 |
| C | -0.94159200 | -0.57570600 | 1.07939700  |
| C | -1.85794300 | 0.39184700  | 1.81290000  |
| C | -0.58609600 | -1.68826500 | 2.07789900  |
| H | -0.14339300 | -1.27461000 | 2.98858600  |
| H | -1.47438900 | -2.26667600 | 2.35539400  |
| H | 0.14384000  | -2.36973900 | 1.63927400  |
| F | -2.09093200 | 1.54901300  | 1.15536100  |
| F | -3.07427600 | -0.14270200 | 2.06775100  |
| F | -1.35723900 | 0.76158100  | 3.01262400  |
| C | 0.71107600  | 0.45339400  | -1.78237000 |
| C | 1.31934900  | -0.70398200 | -1.48876500 |
| N | 1.55720000  | -0.91739300 | -0.09912100 |
| N | 0.42172500  | 1.26122800  | -0.66071200 |
| P | 0.74918200  | 0.36064900  | 0.76823800  |
| C | 0.51338800  | 2.74251300  | -0.79835700 |
| C | 0.56119700  | 3.40058500  | 0.58041700  |
| C | 1.78473300  | 3.12009600  | -1.56751200 |
| C | -0.72595400 | 3.23260700  | -1.55287000 |
| H | -0.28902600 | 3.10453900  | 1.20346500  |
| H | 1.48715700  | 3.15590300  | 1.11222800  |
| H | 0.52254000  | 4.48738100  | 0.45203100  |
| H | 1.76116500  | 2.74335800  | -2.59565600 |
| H | 1.88566700  | 4.21022400  | -1.61002600 |
| H | 2.67044500  | 2.70914100  | -1.06815800 |
| H | -0.65421900 | 4.31072300  | -1.73657000 |
| H | -0.82477000 | 2.73130200  | -2.52246500 |

|   |             |             |             |
|---|-------------|-------------|-------------|
| H | -1.63256900 | 3.03977000  | -0.96919700 |
| C | 2.95399400  | -1.30119700 | 0.28923600  |
| C | 3.37969700  | -2.50353200 | -0.55807600 |
| C | 3.91995800  | -0.13366600 | 0.05717600  |
| C | 2.97392200  | -1.71270000 | 1.76091300  |
| H | 2.62468700  | -3.29706900 | -0.50939700 |
| H | 3.54132500  | -2.23510800 | -1.60673500 |
| H | 4.32355800  | -2.90092200 | -0.17040800 |
| H | 3.68455200  | 0.70837800  | 0.72054600  |
| H | 4.95245100  | -0.44311500 | 0.25675700  |
| H | 3.86234100  | 0.21327100  | -0.98137100 |
| H | 4.00124800  | -1.95341400 | 2.05478200  |
| H | 2.61998100  | -0.90781800 | 2.41502400  |
| H | 2.35273900  | -2.59862700 | 1.92926700  |
| H | 0.40286000  | 0.77360300  | -2.77218500 |
| H | 1.58016300  | -1.47441700 | -2.20435500 |

Zero-point correction= 0.447470 (Hartree/Particle)

Thermal correction to Energy= 0.473285

Thermal correction to Enthalpy= 0.474229

Thermal correction to Gibbs Free Energy= 0.393899

Sum of electronic and zero-point Energies= -1490.379673

Sum of electronic and thermal Energies= -1490.353858

Sum of electronic and thermal Enthalpies= -1490.352913

Sum of electronic and thermal Free Energies= -1490.433244

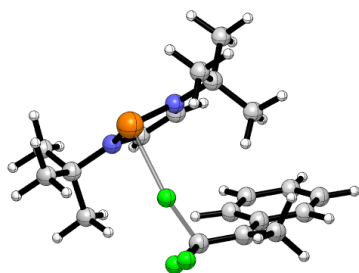

**TS2**

|   |             |             |             |
|---|-------------|-------------|-------------|
| C | -2.86829500 | 0.64104700  | 3.04985000  |
| C | -1.70135100 | -0.05084300 | 2.71067600  |
| C | -1.58438000 | -0.70716600 | 1.48983200  |
| C | -2.64107800 | -0.71254800 | 0.54618900  |
| C | -3.80750700 | 0.00227800  | 0.90658500  |
| C | -3.91793600 | 0.66044800  | 2.13074000  |
| H | -2.95296100 | 1.15548500  | 4.00302500  |
| H | -0.85927300 | -0.06487600 | 3.40002400  |
| H | -0.64326500 | -1.19425800 | 1.25031300  |
| H | -4.64455400 | 0.04348900  | 0.21502200  |
| H | -4.83549300 | 1.19602800  | 2.36425600  |
| C | -2.54910300 | -1.33177300 | -0.76920800 |
| C | -1.47485900 | -2.12452000 | -1.09706900 |

|   |             |             |             |
|---|-------------|-------------|-------------|
| C | -3.48155200 | -0.87773400 | -1.86794800 |
| H | -3.16700400 | -1.26352700 | -2.84120800 |
| H | -4.51545100 | -1.21407200 | -1.70865300 |
| H | -3.51557000 | 0.21952300  | -1.94537500 |
| F | -0.90421300 | -2.93006000 | -0.17569000 |
| F | -1.49112200 | -2.79235300 | -2.26441000 |
| F | -0.00273600 | -1.26731800 | -1.42025600 |
| C | 1.89711400  | 0.70887300  | 1.49229000  |
| C | 1.02976800  | 1.66818300  | 1.07073000  |
| N | 0.98267800  | 1.73982000  | -0.29873300 |
| N | 2.49296000  | 0.06806400  | 0.43421600  |
| P | 1.97462100  | 0.62420700  | -1.05784800 |
| C | 3.46141800  | -1.05935700 | 0.63692800  |
| C | 3.94982000  | -1.54636700 | -0.72482800 |
| C | 4.63901300  | -0.53447800 | 1.45849400  |
| C | 2.72769300  | -2.18616600 | 1.36510700  |
| H | 3.12537800  | -1.93035500 | -1.33729200 |
| H | 4.47246100  | -0.75435100 | -1.27361200 |
| H | 4.65652400  | -2.36620000 | -0.56712100 |
| H | 4.32454000  | -0.20507600 | 2.45372800  |
| H | 5.37233000  | -1.33722400 | 1.58446500  |
| H | 5.12324700  | 0.30267500  | 0.94468200  |
| H | 3.41664700  | -3.02422900 | 1.51093600  |
| H | 2.37049200  | -1.86449000 | 2.34871400  |
| H | 1.87390900  | -2.53333900 | 0.77401500  |
| C | 0.06444800  | 2.69118600  | -1.00875800 |
| C | -1.37068100 | 2.30127600  | -0.65324700 |
| C | 0.39802500  | 4.11050600  | -0.55016400 |
| C | 0.27979800  | 2.56399000  | -2.51438900 |
| H | -1.57172400 | 1.27333400  | -0.97335700 |
| H | -1.55274700 | 2.37676600  | 0.42513200  |
| H | -2.06514200 | 2.97467500  | -1.16668600 |
| H | 1.44575500  | 4.34702800  | -0.76434400 |
| H | -0.23750800 | 4.81746500  | -1.09270000 |
| H | 0.21556900  | 4.24558800  | 0.52032600  |
| H | -0.39120300 | 3.26552600  | -3.01847700 |
| H | 1.30724700  | 2.81626200  | -2.80105800 |
| H | 0.03792400  | 1.55716800  | -2.87503600 |
| H | 2.12321800  | 0.43655900  | 2.51434300  |
| H | 0.41837100  | 2.31268200  | 1.68761400  |

Zero-point correction= 0.443837 (Hartree/Particle)

Thermal correction to Energy= 0.471168

Thermal correction to Enthalpy= 0.472112

Thermal correction to Gibbs Free Energy= 0.386131

Sum of electronic and zero-point Energies= -1490.342784

Sum of electronic and thermal Energies= -1490.315453

Sum of electronic and thermal Enthalpies= -1490.314509

Sum of electronic and thermal Free Energies= -1490.400490

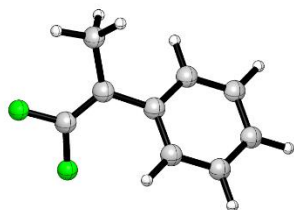

**3c**

|   |             |             |             |
|---|-------------|-------------|-------------|
| C | 2.67882600  | 0.92277300  | -0.45918800 |
| C | 1.31061200  | 1.18321900  | -0.40151300 |
| C | 0.41523300  | 0.20933800  | 0.06433100  |
| C | 0.92882700  | -1.02331700 | 0.49454100  |
| C | 2.29686200  | -1.28162100 | 0.43689000  |
| C | 3.17768500  | -0.31163600 | -0.04329000 |
| H | 3.35566500  | 1.68782500  | -0.82972000 |
| H | 0.93705000  | 2.14920100  | -0.73002000 |
| H | 0.25934500  | -1.77835800 | 0.89606900  |
| H | 2.67528500  | -2.24060800 | 0.78015600  |
| H | 4.24444700  | -0.51346600 | -0.08433100 |
| C | -1.03455200 | 0.52560600  | 0.13566700  |
| C | -1.94990800 | -0.39738400 | -0.13051800 |
| C | -1.46789400 | 1.92521900  | 0.49316500  |
| H | -1.25663100 | 2.62054200  | -0.32642500 |
| H | -2.53754800 | 1.97336900  | 0.70705100  |
| H | -0.92085300 | 2.27202800  | 1.37564000  |
| F | -1.72221600 | -1.64960800 | -0.51546400 |
| F | -3.26566200 | -0.20413800 | -0.07663800 |

Zero-point correction= 0.147866 (Hartree/Particle)

Thermal correction to Energy= 0.157499

Thermal correction to Enthalpy= 0.158443

Thermal correction to Gibbs Free Energy= 0.112310

Sum of electronic and zero-point Energies= -547.095010

Sum of electronic and thermal Energies= -547.085377

Sum of electronic and thermal Enthalpies= -547.084433

Sum of electronic and thermal Free Energies= -547.130566

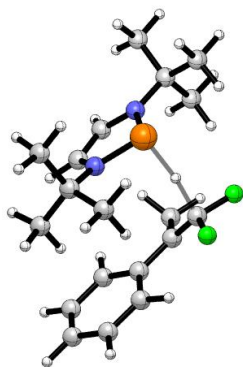

**TS3**

|   |             |             |             |
|---|-------------|-------------|-------------|
| C | -3.80102300 | -0.61682400 | -1.91047300 |
| C | -2.57260800 | -1.18274700 | -1.57104600 |
| C | -2.19611200 | -1.38614900 | -0.22377500 |
| C | -3.13207600 | -0.99673200 | 0.76403600  |
| C | -4.35272300 | -0.42707200 | 0.41922300  |
| C | -4.70155700 | -0.22865200 | -0.92024200 |
| H | -4.04868100 | -0.47521300 | -2.95976900 |
| H | -1.89587400 | -1.46693600 | -2.37097300 |
| H | -2.91279000 | -1.15501600 | 1.81341600  |
| H | -5.04466600 | -0.14277800 | 1.20847800  |
| H | -5.65885600 | 0.21296000  | -1.18300400 |
| C | -0.90413600 | -2.01326300 | 0.06847600  |
| C | -0.19809500 | -1.77506400 | 1.22585400  |
| C | -0.12707400 | -2.62810100 | -1.06286800 |
| H | 0.27818400  | -1.85705600 | -1.74252200 |
| H | 0.71463800  | -3.22061700 | -0.69788100 |
| H | -0.76527300 | -3.28485700 | -1.66435900 |
| F | -0.81219900 | -1.40414100 | 2.37687800  |
| F | 0.82489900  | -2.60724300 | 1.56992600  |
| C | 1.60967600  | 0.55805300  | -1.63022900 |
| C | 0.42585000  | 1.17821000  | -1.43886300 |
| H | 2.00843300  | 0.20106700  | -2.57071100 |
| H | -0.29952200 | 1.43114700  | -2.20045200 |
| N | 0.20039200  | 1.49480600  | -0.09714800 |
| N | 2.34797400  | 0.43969000  | -0.44823400 |
| C | -0.80136400 | 2.49558300  | 0.35739500  |
| C | -1.21208900 | 2.15227300  | 1.79076000  |
| C | -0.17708300 | 3.89246800  | 0.29724900  |
| C | -2.03736100 | 2.42928900  | -0.54000600 |
| H | -1.63095300 | 1.14088900  | 1.83983900  |
| H | -0.36758800 | 2.21931100  | 2.48692600  |
| H | -1.97513000 | 2.85932300  | 2.13196500  |
| H | 0.14559200  | 4.12368000  | -0.72440100 |
| H | -0.90614500 | 4.64900800  | 0.60940400  |

|   |             |             |             |
|---|-------------|-------------|-------------|
| H | 0.69355700  | 3.95502700  | 0.96039600  |
| H | -2.81823600 | 3.06754500  | -0.11361100 |
| H | -1.83189500 | 2.79031700  | -1.55297000 |
| H | -2.41954200 | 1.40552100  | -0.59739600 |
| C | 3.66057300  | -0.24814000 | -0.41251200 |
| C | 4.60172800  | 0.42724700  | -1.41322200 |
| C | 4.24956700  | -0.13129100 | 0.99298800  |
| C | 3.46601500  | -1.72547900 | -0.76470300 |
| H | 4.23305000  | 0.33766600  | -2.44016600 |
| H | 4.71673100  | 1.49013500  | -1.17417600 |
| H | 5.58692400  | -0.04886200 | -1.36772200 |
| H | 3.61976600  | -0.62967400 | 1.74089400  |
| H | 5.22784900  | -0.62164000 | 1.00891600  |
| H | 4.38689000  | 0.91611000  | 1.28413600  |
| H | 4.42827200  | -2.24802300 | -0.72872300 |
| H | 2.78585100  | -2.19901700 | -0.04856000 |
| H | 3.05023700  | -1.84220300 | -1.77187600 |
| P | 1.41872400  | 0.85898700  | 0.92074000  |
| H | 0.66480000  | -0.57329600 | 1.14198200  |

Zero-point correction= 0.447019 (Hartree/Particle)

Thermal correction to Energy= 0.473187

Thermal correction to Enthalpy= 0.474131

Thermal correction to Gibbs Free Energy= 0.392486

Sum of electronic and zero-point Energies= -1391.076730

Sum of electronic and thermal Energies= -1391.050563

Sum of electronic and thermal Enthalpies= -1391.049619

Sum of electronic and thermal Free Energies= -1391.131263

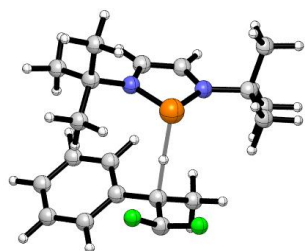

**TS3'**

|   |             |             |             |
|---|-------------|-------------|-------------|
| C | -2.87581800 | 0.58196400  | -2.03329800 |
| C | -1.80541500 | -0.16684900 | -1.54889300 |
| C | -2.00357400 | -1.17654300 | -0.59681600 |
| C | -3.30951000 | -1.42410100 | -0.15111600 |
| C | -4.38009300 | -0.66868000 | -0.62802000 |
| C | -4.16903000 | 0.33946000  | -1.56927200 |
| H | -2.69639600 | 1.36194000  | -2.76893400 |
| H | -0.79892700 | 0.05508200  | -1.89700400 |
| H | -3.49143900 | -2.21937100 | 0.56561600  |
| H | -5.38417800 | -0.87654000 | -0.26767400 |



|   |             |             |             |
|---|-------------|-------------|-------------|
| H | -5.00473600 | 0.92610400  | -1.94119900 |
| C | -0.82277600 | -1.94981600 | -0.08540100 |
| C | -1.01230000 | -2.73520800 | 1.06228700  |
| C | 0.09935600  | -2.53481200 | -1.14196000 |
| H | 0.43817400  | -1.75296200 | -1.82721400 |
| H | 0.97845900  | -2.99544700 | -0.68355000 |
| H | -0.42912100 | -3.29427700 | -1.72928700 |
| F | -1.60292800 | -2.10172000 | 2.13602700  |
| F | 0.12426400  | -3.32209700 | 1.57506700  |
| C | 1.88933200  | 1.27016400  | -1.41543900 |
| C | 0.83608200  | 2.04313200  | -1.08066100 |
| H | 2.46708900  | 1.32251500  | -2.32862100 |
| H | 0.39650100  | 2.82605700  | -1.68293200 |
| N | 0.30529400  | 1.71438100  | 0.16681500  |
| N | 2.21057400  | 0.34058900  | -0.41978400 |
| C | -0.62787800 | 2.57730300  | 0.94118900  |
| C | -1.60324400 | 1.67797500  | 1.70470200  |
| C | 0.18632300  | 3.43416100  | 1.91690100  |
| C | -1.41547800 | 3.48075300  | -0.00606300 |
| H | -2.21904000 | 1.09287900  | 1.01208500  |
| H | -1.07742000 | 0.98729800  | 2.37653200  |
| H | -2.26265800 | 2.29601600  | 2.32283400  |
| H | 0.90831100  | 4.05002500  | 1.36864100  |
| H | -0.47498500 | 4.09655700  | 2.48661900  |
| H | 0.73398000  | 2.80259400  | 2.62592300  |
| H | -2.17571100 | 4.01421100  | 0.57334900  |
| H | -0.77606100 | 4.22999100  | -0.48411200 |
| H | -1.92291700 | 2.89533300  | -0.78036100 |
| C | 3.50260100  | -0.39335400 | -0.42372200 |
| C | 4.64291300  | 0.62019500  | -0.28653500 |
| C | 3.53122400  | -1.36543700 | 0.75535700  |
| C | 3.64208600  | -1.17962100 | -1.73015800 |
| H | 4.65144900  | 1.32136800  | -1.12829600 |
| H | 4.53309300  | 1.19075600  | 0.64263400  |
| H | 5.60659900  | 0.09960300  | -0.26536300 |
| H | 2.68763300  | -2.06603000 | 0.71789300  |
| H | 4.45517000  | -1.95046500 | 0.71212500  |
| H | 3.51379500  | -0.83810400 | 1.71541200  |
| H | 4.59686700  | -1.71611200 | -1.72987400 |
| H | 2.83446500  | -1.91161400 | -1.83085900 |
| H | 3.62993800  | -0.52194700 | -2.60519100 |
| P | 1.07510900  | 0.35069100  | 0.85065200  |
| H | 0.02352000  | -0.84038000 | 0.34347900  |

Zero-point correction= 0.446764 (Hartree/Particle)

Thermal correction to Energy= 0.473259  
 Thermal correction to Enthalpy= 0.474203  
 Thermal correction to Gibbs Free Energy= 0.390169  
 Sum of electronic and zero-point Energies= -1391.052992  
 Sum of electronic and thermal Energies= -1391.026497  
 Sum of electronic and thermal Enthalpies= -1391.025553  
 Sum of electronic and thermal Free Energies= -1391.109588

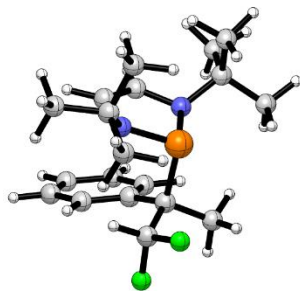

**B**

|   |             |             |             |
|---|-------------|-------------|-------------|
| C | -0.92497400 | 0.97009900  | -1.44984700 |
| C | -0.65400800 | -0.30034100 | -1.77837000 |
| H | -0.93605700 | 1.80104600  | -2.14560300 |
| H | -0.41722200 | -0.64553800 | -2.77835300 |
| N | -0.59738000 | -1.20627900 | -0.68729700 |
| N | -1.11586900 | 1.20970700  | -0.06208700 |
| C | -1.30560000 | -2.51569600 | -0.83310300 |
| C | -0.92686500 | -3.41765100 | 0.34140000  |
| C | -2.82390500 | -2.31332000 | -0.86966100 |
| C | -0.83911500 | -3.18270600 | -2.13032300 |
| H | 0.14954700  | -3.62273000 | 0.34471300  |
| H | -1.20352000 | -2.97087900 | 1.30320100  |
| H | -1.45616100 | -4.37247700 | 0.25434500  |
| H | -3.10045500 | -1.61556000 | -1.66890700 |
| H | -3.33401000 | -3.26588800 | -1.05416800 |
| H | -3.18764000 | -1.91275100 | 0.08413400  |
| H | -1.22258700 | -4.20785100 | -2.16634000 |
| H | -1.20823200 | -2.66278000 | -3.01999700 |
| H | 0.25561700  | -3.22210500 | -2.17419000 |
| C | -2.30553500 | 2.02691500  | 0.33772800  |
| C | -3.60428800 | 1.24210900  | 0.12322200  |
| C | -2.17017600 | 2.42261100  | 1.80762600  |
| C | -2.32720700 | 3.30446700  | -0.50677100 |
| H | -3.66449300 | 0.86941100  | -0.90632000 |
| H | -3.66337100 | 0.38682800  | 0.80741800  |
| H | -4.47391800 | 1.88394500  | 0.30636000  |
| H | -1.31373500 | 3.08957600  | 1.95481600  |
| H | -3.07454600 | 2.95172600  | 2.12725100  |
| H | -2.04840600 | 1.54765600  | 2.45662200  |

|   |             |             |             |
|---|-------------|-------------|-------------|
| H | -3.07122900 | 3.99430700  | -0.09495500 |
| H | -1.34903500 | 3.79938500  | -0.48451600 |
| H | -2.59974400 | 3.10803800  | -1.54846800 |
| P | -0.74019200 | -0.26912000 | 0.77673400  |
| C | 2.63318700  | 2.43189900  | -1.42424300 |
| C | 1.99966800  | 1.94427600  | -0.28216300 |
| C | 1.89827100  | 0.56627300  | -0.03799400 |
| C | 2.49247500  | -0.30549200 | -0.96603100 |
| C | 3.13274700  | 0.18042100  | -2.10466200 |
| C | 3.19793800  | 1.55240300  | -2.34757800 |
| H | 2.68435000  | 3.50490600  | -1.59047600 |
| H | 1.56540800  | 2.65372100  | 0.41442500  |
| H | 2.45158300  | -1.38113500 | -0.82453500 |
| H | 3.57680100  | -0.52064300 | -2.80658000 |
| H | 3.69149800  | 1.93122900  | -3.23852100 |
| C | 1.12911500  | 0.05844100  | 1.16480900  |
| C | 1.70063400  | -1.26983500 | 1.63479000  |
| C | 1.13522300  | 1.04108100  | 2.34385000  |
| H | 0.65308500  | 0.59968100  | 3.22133300  |
| H | 2.16025600  | 1.31982700  | 2.61147700  |
| H | 0.59142400  | 1.95500500  | 2.09667900  |
| F | 3.00785400  | -1.11492400 | 2.03908000  |
| F | 1.02953600  | -1.72077000 | 2.74690700  |
| H | 1.67838700  | -2.07762900 | 0.90387100  |

Zero-point correction= 0.456254 (Hartree/Particle)

Thermal correction to Energy= 0.481395

Thermal correction to Enthalpy= 0.482339

Thermal correction to Gibbs Free Energy= 0.403657

Sum of electronic and zero-point Energies= -1391.146580

Sum of electronic and thermal Energies= -1391.121440

Sum of electronic and thermal Enthalpies= -1391.120496

Sum of electronic and thermal Free Energies= -1391.199177

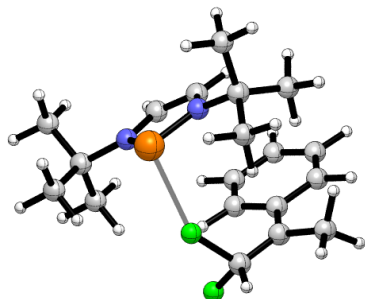

**TS4**

|   |             |            |             |
|---|-------------|------------|-------------|
| C | -1.73932000 | 1.89417300 | -0.77074000 |
| C | -2.50084400 | 0.79974500 | -1.06283300 |
| H | -1.65840300 | 2.80601000 | -1.34728700 |
| H | -3.14824300 | 0.66688900 | -1.91979700 |

|   |             |             |             |
|---|-------------|-------------|-------------|
| N | -2.35376500 | -0.17992900 | -0.12156100 |
| N | -1.03863900 | 1.72260800  | 0.38965200  |
| C | -3.08252700 | -1.49009900 | -0.21578900 |
| C | -2.69709100 | -2.36165200 | 0.97625200  |
| C | -4.58240500 | -1.19718300 | -0.19202100 |
| C | -2.66582400 | -2.17617800 | -1.51644700 |
| H | -1.62314100 | -2.58398300 | 0.98705100  |
| H | -2.98311200 | -1.90009900 | 1.92860400  |
| H | -3.23173800 | -3.31235400 | 0.89311900  |
| H | -4.88733500 | -0.59100100 | -1.05066800 |
| H | -5.12961200 | -2.14412700 | -0.23237100 |
| H | -4.85717300 | -0.67227100 | 0.72896100  |
| H | -3.18785600 | -3.13524100 | -1.59229400 |
| H | -2.92904100 | -1.57673500 | -2.39360800 |
| H | -1.58720200 | -2.36570500 | -1.52386500 |
| C | -0.10410200 | 2.77301700  | 0.91596300  |
| C | -0.91308200 | 4.04504700  | 1.16737100  |
| C | 0.52146100  | 2.27871000  | 2.21705800  |
| C | 0.98627500  | 2.99133900  | -0.13195500 |
| H | -1.34387100 | 4.43772400  | 0.24111400  |
| H | -1.72116200 | 3.85345000  | 1.88135500  |
| H | -0.25089100 | 4.80968800  | 1.58533200  |
| H | 1.11565500  | 1.36984700  | 2.06163800  |
| H | 1.19503800  | 3.05520200  | 2.59093100  |
| H | -0.23355900 | 2.09200100  | 2.98966400  |
| H | 1.70551100  | 3.72358600  | 0.24923800  |
| H | 1.51334900  | 2.05136800  | -0.32873200 |
| H | 0.57468300  | 3.37445400  | -1.07125900 |
| P | -1.28897600 | 0.22869200  | 1.11216900  |
| C | 2.66214200  | 0.85192300  | -2.62236400 |
| C | 3.20111600  | 0.23206100  | -1.49586100 |
| C | 2.45189800  | -0.67755500 | -0.70542300 |
| C | 1.11142300  | -0.90289500 | -1.12626100 |
| C | 0.58008900  | -0.27765600 | -2.24927500 |
| C | 1.34588600  | 0.60920900  | -3.01584000 |
| H | 3.28275100  | 1.53661600  | -3.19707800 |
| H | 4.22943600  | 0.45510200  | -1.22479600 |
| H | 0.48402600  | -1.58641200 | -0.56238600 |
| H | -0.44871200 | -0.48976800 | -2.53337600 |
| H | 0.92458300  | 1.09367100  | -3.89241600 |
| C | 3.03941000  | -1.29712700 | 0.46535800  |
| C | 2.37781300  | -2.24098700 | 1.23843200  |
| C | 4.34617900  | -0.76208600 | 1.00597500  |
| H | 4.62259400  | -1.28364700 | 1.92931500  |

|   |            |             |            |
|---|------------|-------------|------------|
| H | 5.18390900 | -0.89225200 | 0.30505500 |
| H | 4.30447700 | 0.31362800  | 1.24194900 |
| F | 1.12487600 | -1.63156600 | 2.21127100 |
| F | 1.56554200 | -3.16419000 | 0.60684500 |
| H | 2.92176100 | -2.72381200 | 2.04480500 |

Zero-point correction= 0.453035 (Hartree/Particle)

Thermal correction to Energy= 0.479213

Thermal correction to Enthalpy= 0.480158

Thermal correction to Gibbs Free Energy= 0.397824

Sum of electronic and zero-point Energies= -1391.107678

Sum of electronic and thermal Energies= -1391.081499

Sum of electronic and thermal Enthalpies= -1391.080555

Sum of electronic and thermal Free Energies= -1391.162889

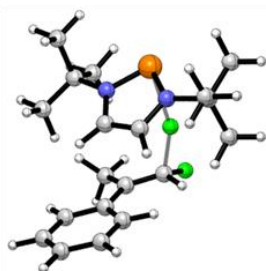

**TS5**

|   |             |             |             |
|---|-------------|-------------|-------------|
| C | -0.49954100 | 1.18635400  | -1.14029300 |
| C | -1.46334100 | 0.29031000  | -1.49817400 |
| H | 0.35630000  | 1.49342600  | -1.72636000 |
| H | -1.53126800 | -0.25789700 | -2.42866400 |
| N | -2.40602600 | 0.14470000  | -0.51662300 |
| N | -0.72854600 | 1.70350600  | 0.10573300  |
| C | -3.55451100 | -0.81023800 | -0.65583000 |
| C | -2.98187200 | -2.21256400 | -0.86645200 |
| C | -4.38989300 | -0.77666200 | 0.62109500  |
| C | -4.39980100 | -0.36503500 | -1.84884500 |
| H | -2.40033300 | -2.27638000 | -1.79182700 |
| H | -2.34337900 | -2.49677100 | -0.02393400 |
| H | -3.80897000 | -2.92641600 | -0.93547100 |
| H | -4.81074700 | 0.21843800  | 0.80631700  |
| H | -5.22325600 | -1.47531500 | 0.50392100  |
| H | -3.80850800 | -1.09467500 | 1.49448600  |
| H | -5.25454400 | -1.04098000 | -1.95152700 |
| H | -4.77437200 | 0.65255800  | -1.69591600 |
| H | -3.82852800 | -0.39566200 | -2.78203100 |
| C | 0.19919600  | 2.70236600  | 0.73241600  |
| C | 0.21628600  | 3.94995500  | -0.15086600 |
| C | -0.31327400 | 3.05195700  | 2.12648700  |
| C | 1.58737800  | 2.06762900  | 0.82784600  |
| H | 0.60609700  | 3.72995000  | -1.14972000 |

|   |             |             |             |
|---|-------------|-------------|-------------|
| H | -0.79158200 | 4.36721700  | -0.24761400 |
| H | 0.86491100  | 4.70282600  | 0.30786300  |
| H | -0.33580700 | 2.17348600  | 2.78212600  |
| H | 0.36885400  | 3.78205100  | 2.57148100  |
| H | -1.31124500 | 3.50431600  | 2.09100000  |
| H | 2.27210900  | 2.77986900  | 1.29975700  |
| H | 1.55358100  | 1.15696500  | 1.43574600  |
| H | 1.98587700  | 1.81693500  | -0.16161500 |
| P | -2.08765900 | 1.06328700  | 0.84542100  |
| C | 4.72859800  | 0.14386200  | -0.60733800 |
| C | 3.95269700  | -0.67416700 | 0.21521200  |
| C | 2.69492200  | -1.18559100 | -0.19743400 |
| C | 2.29604700  | -0.83446000 | -1.51736700 |
| C | 3.06944500  | -0.01570100 | -2.32884400 |
| C | 4.29809700  | 0.49443000  | -1.88606400 |
| H | 5.68170100  | 0.51396400  | -0.23463900 |
| H | 4.32509800  | -0.90979300 | 1.20787400  |
| H | 1.35836700  | -1.21244900 | -1.91760900 |
| H | 2.71196100  | 0.22575900  | -3.32824400 |
| H | 4.90080700  | 1.13314900  | -2.52540400 |
| C | 1.91354500  | -2.02119500 | 0.69410900  |
| C | 0.54837400  | -2.18513000 | 0.48555100  |
| C | 2.47870200  | -2.39347200 | 2.04437800  |
| H | 1.79208800  | -3.05234900 | 2.58508400  |
| H | 3.43919900  | -2.92166600 | 1.96480100  |
| H | 2.65895700  | -1.51726400 | 2.68932400  |
| F | -0.02968100 | -3.32078000 | 1.02609400  |
| F | -0.39078100 | -1.13044700 | 1.36728200  |
| H | 0.10137900  | -1.97489100 | -0.48219500 |

Zero-point correction= 0.453000 (Hartree/Particle)

Thermal correction to Energy= 0.479298

Thermal correction to Enthalpy= 0.480243

Thermal correction to Gibbs Free Energy= 0.396948

Sum of electronic and zero-point Energies= -1391.107631

Sum of electronic and thermal Energies= -1391.081333

Sum of electronic and thermal Enthalpies= -1391.080389

Sum of electronic and thermal Free Energies= -1391.163683

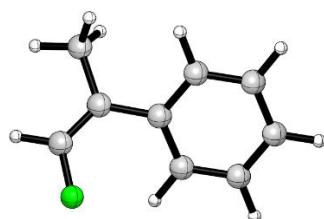

Z-4c

|   |             |            |             |
|---|-------------|------------|-------------|
| C | -2.28322600 | 0.98916400 | -0.44932600 |
|---|-------------|------------|-------------|

|   |             |             |             |
|---|-------------|-------------|-------------|
| C | -0.90550900 | 1.19828400  | -0.40372700 |
| C | -0.04099100 | 0.19289700  | 0.05468100  |
| C | -0.59840000 | -1.01945500 | 0.49110500  |
| C | -1.97600800 | -1.22495000 | 0.45141000  |
| C | -2.82438600 | -0.22390300 | -0.02373800 |
| H | -2.93443800 | 1.77796300  | -0.81628400 |
| H | -0.50173400 | 2.14980500  | -0.73872400 |
| H | 0.04812800  | -1.79938800 | 0.88196800  |
| H | -2.38704900 | -2.16818900 | 0.80111400  |
| H | -3.89834200 | -0.38571900 | -0.05442000 |
| C | 1.42359800  | 0.43947200  | 0.11104000  |
| C | 2.33244600  | -0.49745300 | -0.15697300 |
| C | 1.91235100  | 1.81848200  | 0.47762900  |
| H | 3.00001800  | 1.83000400  | 0.59249700  |
| H | 1.64940400  | 2.55033300  | -0.29387400 |
| H | 1.45911000  | 2.15198800  | 1.41774500  |
| F | 1.99074900  | -1.75242500 | -0.55393100 |
| H | 3.40891700  | -0.37020600 | -0.11724700 |

Zero-point correction= 0.155447 (Hartree/Particle)

Thermal correction to Energy= 0.164346

Thermal correction to Enthalpy= 0.165290

Thermal correction to Gibbs Free Energy= 0.120929

Sum of electronic and zero-point Energies= -447.873984

Sum of electronic and thermal Energies= -447.865084

Sum of electronic and thermal Enthalpies= -447.864140

Sum of electronic and thermal Free Energies= -447.908502

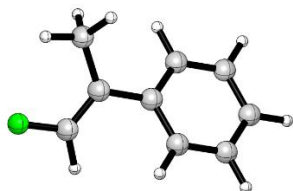

**E-4c**

|   |             |             |             |
|---|-------------|-------------|-------------|
| C | 2.41880800  | 1.03329600  | -0.30623100 |
| C | 1.03134400  | 1.16409300  | -0.25821700 |
| C | 0.21538800  | 0.06021200  | 0.03093800  |
| C | 0.83159500  | -1.17290300 | 0.29690800  |
| C | 2.21752800  | -1.30388000 | 0.24422200  |
| C | 3.01834400  | -0.20148000 | -0.05902000 |
| H | 3.03113600  | 1.90051400  | -0.53845400 |
| H | 0.58121100  | 2.13306700  | -0.45643900 |
| H | 0.22419100  | -2.03226100 | 0.56860000  |
| H | 2.67389000  | -2.26736800 | 0.45537000  |
| H | 4.09958600  | -0.30281900 | -0.09198600 |
| C | -1.26274600 | 0.21687700  | 0.06867800  |

|   |             |             |             |
|---|-------------|-------------|-------------|
| C | -2.02994700 | -0.81057000 | -0.29225100 |
| C | -1.84788600 | 1.54031800  | 0.48487800  |
| H | -2.92000500 | 1.45734500  | 0.67533400  |
| H | -1.35782000 | 1.90647700  | 1.39323300  |
| H | -1.70275200 | 2.29626400  | -0.29544300 |
| F | -3.38638400 | -0.71833400 | -0.25791000 |
| H | -1.70655600 | -1.78200500 | -0.64845700 |

Zero-point correction= 0.155672 (Hartree/Particle)

Thermal correction to Energy= 0.164539

Thermal correction to Enthalpy= 0.165484

Thermal correction to Gibbs Free Energy= 0.121488

Sum of electronic and zero-point Energies= -447.874892

Sum of electronic and thermal Energies= -447.866024

Sum of electronic and thermal Enthalpies= -447.865080

Sum of electronic and thermal Free Energies= -447.909075

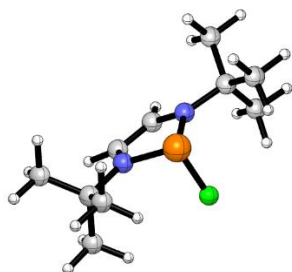

**1-F**

|   |             |             |             |
|---|-------------|-------------|-------------|
| C | -0.67205600 | 1.44233400  | 0.59624700  |
| C | 0.67206700  | 1.44233100  | 0.59624500  |
| H | -1.32636800 | 2.20252100  | 1.00080600  |
| H | 1.32639000  | 2.20251800  | 1.00079100  |
| N | 1.19583500  | 0.30604400  | -0.04340600 |
| N | -1.19583300 | 0.30605400  | -0.04341100 |
| C | 2.66019100  | 0.09610400  | -0.16245600 |
| C | 2.92982700  | -1.15541700 | -0.99721500 |
| C | 3.27932200  | 1.30839800  | -0.86436400 |
| C | 3.26273400  | -0.07683800 | 1.23572000  |
| H | 2.53734000  | -2.05959000 | -0.51715200 |
| H | 2.49316500  | -1.06848500 | -1.99847700 |
| H | 4.01169600  | -1.28171800 | -1.10574200 |
| H | 3.15173200  | 2.22510700  | -0.27957700 |
| H | 4.35366000  | 1.14562200  | -1.00081200 |
| H | 2.82196700  | 1.45642600  | -1.84881000 |
| H | 4.34525400  | -0.22982800 | 1.16343900  |
| H | 3.08465700  | 0.81035200  | 1.85315200  |
| H | 2.82150400  | -0.94453200 | 1.73842600  |
| C | -2.66019000 | 0.09610900  | -0.16245400 |
| C | -3.27931900 | 1.30829100  | -0.86456200 |
| C | -2.92980900 | -1.15553700 | -0.99702900 |



|   |             |             |             |
|---|-------------|-------------|-------------|
| C | -3.26275500 | -0.07662200 | 1.23574000  |
| H | -3.15178300 | 2.22509100  | -0.27990800 |
| H | -2.82192700 | 1.45618500  | -1.84901200 |
| H | -4.35364600 | 1.14546600  | -1.00103300 |
| H | -2.53736900 | -2.05964300 | -0.51680300 |
| H | -4.01167600 | -1.28183300 | -1.10559300 |
| H | -2.49308800 | -1.06877600 | -1.99828000 |
| H | -4.34527800 | -0.22959300 | 1.16347000  |
| H | -2.82155300 | -0.94425500 | 1.73857500  |
| H | -3.08465600 | 0.81065300  | 1.85304400  |
| P | -0.00000300 | -0.85374000 | -0.35925900 |
| F | -0.00000700 | -1.70724400 | 1.14343100  |

Zero-point correction= 0.295975 (Hartree/Particle)

Thermal correction to Energy= 0.312508

Thermal correction to Enthalpy= 0.313453

Thermal correction to Gibbs Free Energy= 0.253493

Sum of electronic and zero-point Energies= -943.285001

Sum of electronic and thermal Energies= -943.268467

Sum of electronic and thermal Enthalpies= -943.267523

Sum of electronic and thermal Free Energies= -943.327482

## Supplementary References

- Zhang, J., Yang, J.-D. & Cheng, J.-P. A Nucleophilicity Scale for the Reactivity of Diazaphospholenium Hydrides: Structural Insights and Synthetic Applications. *Angew. Chem. Int. Ed.* **58**, 5983-5987 (2019).
- Frisch, M. J. T., G. W.; Schlegel, H. B.; Scuseria, G. E.; Robb, M. A.; Cheeseman, J. R.; Scalmani, G.; Barone, V.; Mennucci, B.; Petersson, G. A.; Nakatsuji, H.; Caricato, M.; Li, X.; Hratchian, H.P.; Izmaylov, A. F.; Bloino, J.; Zheng, G.; Sonnenberg, J. L.; Hada, M.; Ehara, M.; Toyota, K.; Fukuda, R.; Hasegawa, J.; Ishida, M.; Nakajima, T.; Honda, Y.; Kitao, O.; Nakai, H.; Vreven, T.; Montgomery, J. A., Jr.; J. E, P.; Ogliaro, F.; Bearpark, M.; Heyd, J. J.; Brothers, E.; Kudin, K.N.; Staroverov, V. N.; Keith, T.; Kobayashi, R.; Normand, J.; Raghavachari, K.; Rendell, A.; Burant, J. C.; Iyengar, S. S.; Tomasi, J.; Cossi, M.; Rega, N.; Millam, J. M.; Klene, M.; Knox, J. E.; Cross, J.B.; Bakken, V.; Adamo, C.; Jaramillo, J.; Gomperts, R.; Stratmann, R.E.; Yazyev, O.; Austin, A. J.; Cammi, R.; Pomelli, C.; Ochterski, J. W.; Martin, R. L.; Morokuma, K.; Zakrzewski, V. G.; Voth, G. A.; Salvador, P.; Dannenberg, J. J.; Dapprich, S.; Daniels, A. D.; Farkas, O.; Foresman, J. B.; Ortiz, J. V.; Cioslowski, J.; Fox, D. J. Gaussian 09, Revision D.01, Gaussian, Inc., Wallingford, CT, 2013.
- Zhao, Y. & Truhlar, D. G. Density Functionals with Broad Applicability in Chemistry. *Acc. Chem. Res.* **41**, 157-167 (2008).
- Zhao, Y. & Truhlar, D. G. Applications and Validations of the Minnesota Density Functionals. *Chem. Phys. Lett.* **502**, 1-13 (2011).
- Marenich, A. V., Cramer, C. J. & Truhlar, D. G. Universal Solvation Model Based on Solute Electron Density and on a Continuum Model of the Solvent Defined by the Bulk Dielectric Constant and Atomic Surface Tensions. *J. Phys. Chem. B* **113**, 6378-6396 (2009).
- Yao, C., Wang, S., Norton, J. & Hammond, M. Catalyzing the Hydrodefluorination of CF<sub>3</sub>-Substituted

- Alkenes by PhSiH<sub>3</sub>. H• Transfer from a Nickel Hydride. *J. Am. Chem. Soc.* **142**, 4793-4799 (2020).
7. Engman, M., Cheruku, P., Tolstoy, P., Bergquist, J., Völker, S. F. & Andersson, P. G. Highly Selective Iridium-Catalyzed Asymmetric Hydrogenation of Trifluoromethyl Olefins: A New Route to Trifluoromethyl- Bearing Stereocenters. *Adv. Synth. Catal.* **351**, 375-378 (2009).
  8. Guo, Y.-Q., Wang, R., Song, H., Liu, Y. & Wang, Q. Visible-Light-Induced Deoxygenation/Defluorination Protocol for Synthesis of  $\gamma,\gamma$ -Difluoroallylic Ketones. *Org. Lett.* **22**, 709-713 (2020).
  9. Hamlin, T. A., Kelly, C. B., Cywar, R. M. & Leadbeater, N. E. Methylenation of Perfluoroalkyl Ketones using a Peterson Olefination Approach. *J. Org. Chem.* **79**, 1145-1155 (2014).
  10. Phelan, J. P., *et al.* Redox-Neutral Photocatalytic Cyclopropanation via Radical/Polar Crossover. *J. Am. Chem. Soc.* **140**, 8037-8047 (2018).
  11. Chen, F., Xu, X., He, Y., Huang, G. & Zhu, S. NiH-Catalyzed Migratory Defluorinative Olefin Cross-Coupling: Trifluoromethyl-Substituted Alkenes as Acceptor Olefins to Form gem-Difluoroalkenes. *Angew. Chem. Int. Ed.* **59**, 5398-5402 (2020).
  12. Li, Y., *et al.* Palladium-catalyzed Suzuki–Miyaura Reaction of Fluorinated Vinyl Chloride: A New Approach for Synthesis  $\alpha$  and  $\alpha,\beta$ -Trifluoromethylstyrenes. *Tetrahedron* **72**, 5684-5690 (2016).
  13. Fujita, T., *et al.* Flash Generation and Borylation of 1-(Trifluoromethyl)vinyllithium toward Synthesis of  $\alpha$ -(Trifluoromethyl)styrenes. *J. Fluorine Chem.* **207**, 72-76 (2018).
  14. Liu, Y., Zhou, Y., Zhao, Y. & Qu, J. Synthesis of gem-Difluoroallylboronates via FeCl<sub>2</sub>-Catalyzed Boration/ $\beta$ -Fluorine Elimination of Trifluoromethyl Alkenes. *Org. Lett.* **19**, 946-949 (2017).
  15. Feng, S., Tang, Y., Yang, C., Shen, C. & Dong, K. Synthesis of Enantioenriched  $\alpha,\alpha$ -Difluoro- $\beta$ -arylbutanoic Esters by Pd-Catalyzed Asymmetric Hydrogenation. *Org. Lett.* **22**, 7508-7512 (2020).
  16. Lang, S. B., Wiles, R. J., Kelly, C. B. & Molander, G. A. Photoredox Generation of Carbon-Centered Radicals Enables the Construction of 1,1-Difluoroalkene Carbonyl Mimics. *Angew. Chem. Int. Ed.* **56**, 15073-15077 (2017).
  17. Trost, B. M. & Debieu, L. Palladium-Catalyzed Trimethylenemethane Cycloaddition of Olefins Activated by the  $\sigma$ -Electron-Withdrawing Trifluoromethyl Group. *J. Am. Chem. Soc.* **137**, 11606-11609 (2015).
  18. Wang, X., *et al.* Pd–Carbene Migratory Insertion: Application to the Synthesis of Trifluoromethylated Alkenes and Dienes. *Chem. Eur. J.* **20**, 961-965 (2014).
  19. Liu, Z., Tu, X.-S., Guo, L.-T. & Wang, X.-C. Aluminum-Catalyzed Tunable Halodefluorination of Trifluoromethyl- and Difluoroalkyl-Substituted Olefins. *Chem. Sci.* **11**, 11548-11553 (2020).
  20. Lu, X., Wang, X.-X., Gong, T.-J., Pi, J.-J., He, S.-J. & Fu, Y. Nickel-Catalyzed Allylic Defluorinative Alkylation of Trifluoromethyl Alkenes with Reductive Decarboxylation of Redox-Active Esters. *Chem. Sci.* **10**, 809-814 (2019).
  21. Krishnamoorthy, S., Kothandaraman, J., Saldana, J. & Prakash, G. K. S. Direct Difluoromethylenation of Carbonyl Compounds by Using TMSCF<sub>3</sub>: The Right Conditions. *Eur. J. Org. Chem.* **2016**, 4965-4969 (2016).
  22. Zhang, Z., Yu, W., Wu, C., Wang, C., Zhang, Y. & Wang, J. Reaction of Diazo Compounds with Difluorocarbene: An Efficient Approach towards 1,1-Difluoroolefins. *Angew. Chem. Int. Ed.* **55**, 273-277 (2016).
  23. Hu, M., Ni, C., Li, L., Han, Y. & Hu, J. gem-Difluoroolefination of Diazo Compounds with TMSCF<sub>3</sub> or TMSCF<sub>2</sub>Br: Transition-Metal-Free Cross-Coupling of Two Carbene Precursors. *J. Am. Chem. Soc.* **137**, 14496-14501 (2015).
  24. Tian, H., Shimakoshi, H., Imamura, K., Shiota, Y., Yoshizawa, K. & Hisaeda, Y. Photocatalytic Alkene Reduction by A B<sub>12</sub>-TiO<sub>2</sub> Hybrid Catalyst Coupled with C–F Bond Cleavage for gem-Difluoroolefin

- Synthesis. *Chem. Commun.* **53**, 9478-9481 (2017).
25. Loska, R. & Bukowska, P. A Three-Component Synthesis of Aryl(heteroaryl)acylamides. *Org. Biomol. Chem.* **13**, 9872-9882 (2015).
  26. Qiao, Y., Si, T., Yang, M.-H. & Altman, R. A. Metal-Free Trifluoromethylation of Aromatic and Heteroaromatic Aldehydes and Ketones. *J. Org. Chem.* **79**, 7122-7131 (2014).
  27. Hu, M., He, Z., Gao, B., Li, L., Ni, C. & Hu, J. Copper-Catalyzed gem-Difluoroolefination of Diazo Compounds with TMSCF<sub>3</sub> via C–F Bond Cleavage. *J. Am. Chem. Soc.* **135**, 17302-17305 (2013).
  28. Greedy, B. & Gouverneur, V. Fluorodesilylation of Alkenyltrimethylsilanes: A New Route to Fluoroalkenes and Difluoromethyl-Substituted Amides, Alcohols or Ethers. *Chem. Commun.*, 233-234 (2001).
  29. Poutrel, P., Pannecoucke, X., Jubault, P. & Poisson, T. Stereoselective Synthesis of Terminal Monofluoroalkenes from Trifluoromethylated Alkenes. *Org. Lett.* **22**, 4858-4863 (2020).
  30. Liu, Q., Shen, X., Ni, C. & Hu, J. Stereoselective Carbonyl Olefination with Fluorosulfoximines: Facile Access to Z or E Terminal Monofluoroalkenes. *Angew. Chem. Int. Ed.* **56**, 619-623 (2017).
